# Supplementary material for: Proteomics of Aggregatibacter actinomycetemcomitans Outer Membrane Vesicles
Source: PLoS One. 2015 Sep 18;10(9):e0138591. doi: 10.1371/journal.pone.0138591 (PMC4575117; doi:10.1371/journal.pone.0138591)
Supplement: S1 Table — In total, 504 proteins were identified. (XLSX) [file pone.0138591.s002.xlsx]

## Sheet: New Sheet
S1 Table. Proteins identified by LC-MS/MS in at least one of the four independent OMV preparations of A. actinomycetemcomitans strain 173. In total, 504 proteins were identified.
Subcellular locations were predicted using PSORT3b [1] and Pathway annotation was performed using KOBAS 2.0 [2].
Proteomics	Proteomics	Proteomics	Proteomics	Proteomics	Proteomics	Proteomics	Proteomics	Proteomics	Localization prediction	Localization prediction	Localization prediction	KOBAS 2 KEGG	KOBAS 2 KEGG	Metabolism	Metabolism	Metabolism	Metabolism; overview	Metabolism; overview	Metabolism; Amino acid metabolism	Metabolism; Amino acid metabolism	Metabolism; Amino acid metabolism	Metabolism; Metabolism of other amino acids	Metabolism; Metabolism of other amino acids	Metabolism; Nucleotide metabolism	Metabolism; Nucleotide metabolism	Metabolism; Carbohydrate metabolism	Metabolism; Carbohydrate metabolism	Metabolism; Carbohydrate metabolism	Metabolism; Carbohydrate metabolism	Metabolism; Carbohydrate metabolism	Metabolism; Carbohydrate metabolism	Metabolism; Carbohydrate metabolism	Metabolism; Carbohydrate metabolism	Metabolism; Energy metabolism	Metabolism; Energy metabolism	Metabolism; Lipid metabolism	Metabolism; Lipid metabolism	Metabolism; Glycan biosynthesis and metabolism	Metabolism; Metabolism of cofactors and vitamins	Metabolism; Metabolism of cofactors and vitamins	Metabolism; Metabolism of cofactors and vitamins	Genetic information processing; Translation	Genetic information processing; Translation	Genetic Information Processing; Folding, sorting and degradation	Genetic information processing; Folding, sorting and degradation	Genetic information processing; Folding, sorting and degradation	Genetic information processing; Replication and repair	Genetic information processing; Replication and repair	Genetic information processing; Replication and repair
Row	Accession	gi number (NCBInr)	Protein description	MW [kDa]	Mascot Score	Peptides matched	Sequence coverage [%]	Detected in at least three prep. (151 proteins)	PSORT 3b localization score	Predicted localization PSORT 3b)	Note	D7S homolog for KEGG annotation (482 proteins)	Any KEGG annotation (244 proteins)	KEGG metabolism (110 proteins)	KEGG biosynthesis of secondary metabolites (52 proteins)	KEGG microbial metabolism in diverse envrionments (36 proteins)	KEGG carbon metabolism (29 proteins)	KEGG biosynthesis of amino acids (20 proteins)	KEGG Alanine, aspartate and glutamate metabolism (6 proteins)	KEGG Glycine, serine and threonine metabolism (6 proteins)	KEGG Cysteine and methionine metabolism (4 proteins)	KEGG glutathione metabolism (4 proteins)	KEGG selenocompound metabolism (4 proteins)	KEGG purine metabolism (17 proteins)	KEGG pyrimidine metabolism (14 proteins)	KEGG glycolysis (17 proteins)	KEGG amino sugar and nucleotide metabolism (17 proteins)	KEGG pyruvate metabolism (15 proteins)	KEGG fructose and mannose metabolism (11 proteins)	KEGG propanoate metabolism (8 proteins)	KEGG TCA cycle (8 proteins)	KEGG pentose phosphate pathway (6 proteins)	KEGG butanoate metabolism (4 proteins)	KEGG Oxidative phosphorylation (9 proteins)	KEGG methane metabolism (8 proteins)	KEGG glycero-phospholipid metabolism (8 proteins)	KEGG fatty acid biosynthesis (6 proteins)	KEGG lipopolysaccharide biosynthesis (7 proteins)	KEGG porphyrin and chlorophyll metabolism (4 proteins)	KEGG nicotinate and nicotinamide metabolism (4 proteins)	KEGG thiamine metabolism (2 proteins)	KEGG Ribosomes (36 proteins)	KEGG Aminoacyl t-RNA biosynthesis (13 proteins)	KEGG Protein export (11 proteins)	KEGG RNA degradation (10 proteins)	KEGG sulfur relay system (1 protein)	KEGG homologous recombination (4 proteins)	KEGG mismatch repair (4 proteins)	KEGG DNA replication (3 proteins)
			Carbon and carbohydrate metabolism
2	EGY34365	gi|347992988	pyruvate dehydrogenase subunit E1	99.0	4204.9	52	63.7	Yes	9.97	Cytoplasmic		Yes	Yes	Yes	Yes	Yes	Yes									Yes		Yes			Yes		Yes
7	EGY33510	gi|347992085	L-lactate dehydrogenase LctD	42.0	3570.8	49	86.4	Yes	9.97	Cytoplasmic		Yes	Yes	Yes														Yes
8	EGY33246	gi|347991783	formate acetyltransferase	86.2	3408.9	42	59.0	Yes	9.97	Cytoplasmic		Yes	Yes	Yes														Yes		Yes			Yes
17	EGY34754	gi|347993386	glyceraldehyde-3-phosphate dehydrogenase, type I	35.6	2659.2	33	62.9	Yes	9.97	Cytoplasmic		Yes	Yes	Yes	Yes	Yes		Yes								Yes
23	EGY34366	gi|347992989	dihydrolipoamide acetyltransferase component of pyruvate dehydrogenase complex	55.6	2501.2	34	49.9	Yes	9.97	Cytoplasmic		Yes	Yes	Yes	Yes	Yes	Yes									Yes		Yes			Yes
26	EGY34357	gi|347992980	phosphate acetyltransferase	76.8	2204.3	28	58.1	Yes	9.97	Cytoplasmic		Yes	Yes	Yes		Yes	Yes											Yes		Yes					Yes
33	EGY34367	gi|347992990	dihydrolipoyl dehydrogenase	50.7	1845.6	23	54.0	Yes	9.97	Cytoplasmic		Yes	Yes	Yes	Yes	Yes	Yes			Yes						Yes		Yes			Yes
37	EGY34358	gi|347992981	acetate kinase	43.8	1795.3	22	72.0	Yes	9.97	Cytoplasmic		Yes	Yes	Yes		Yes	Yes											Yes		Yes					Yes
41	EGY32987	gi|347991524	phosphoglycerate kinase	41.0	1730.0	23	69.5	Yes	9.97	Cytoplasmic		Yes	Yes	Yes	Yes	Yes	Yes	Yes								Yes
42	EGY35094	gi|347993756	transketolase	72.7	1727.7	20	45.0	Yes	9.26	Cytoplasmic		Yes	Yes	Yes	Yes	Yes	Yes	Yes														Yes
45	EGY32637	gi|347991138	phosphoglucomutase/phosphomannomutase	59.4	1695.7	23	65.2	Yes	9.26	Cytoplasmic		Yes	Yes	Yes	Yes												Yes		Yes
46	EGY33618	gi|347992202	MtlA protein	66.6	1631.4	20	38.8	Yes	10	CytoplasmicMembrane		Yes	Yes																Yes
56	EGY33407	gi|347991967	PTS system mannose-specific EIIAB component	36.1	1417.6	19	70.2	Yes	9.97	Cytoplasmic		Yes	Yes	Yes													Yes		Yes
70	EGY32468	gi|347990952	phosphoenolpyruvate carboxykinase	59.1	1192.2	15	43.9	Yes	9.97	Cytoplasmic		Yes	Yes	Yes	Yes	Yes										Yes		Yes			Yes
90	EGY34527	gi|347993150	pyruvate kinase	50.0	1049.5	14	44.0	Yes	9.97	Cytoplasmic		Yes	Yes	Yes	Yes	Yes	Yes	Yes						Yes		Yes		Yes
93	EGY33405	gi|347991965	mannose-specific PTS system protein IID	30.2	998.3	12	37.4	Yes	10	CytoplasmicMembrane		Yes	Yes	Yes													Yes		Yes
95	EGY33541	gi|347992116	alpha-ketoglutarate decarboxylase	109.0	983.9	14	23.3		9.97	Cytoplasmic		Yes	Yes	Yes	Yes	Yes	Yes														Yes
97	EGY33542	gi|347992117	dihydrolipoyllysine-residue succinyltransferase	44.5	977.3	14	42.3		9.97	Cytoplasmic		Yes	Yes	Yes	Yes	Yes	Yes														Yes
132	EGY32425	gi|347990909	phosphopyruvate hydratase	46.1	726.0	9	33.5		9.97	Cytoplasmic		Yes	Yes	Yes	Yes	Yes	Yes	Yes								Yes									Yes										Yes
137	EGY34015	gi|347992630	5,10-methylenetetrahydrofolate reductase	33.2	715.7	12	55.1		9.97	Cytoplasmic		Yes	Yes	Yes		Yes	Yes
142	EGY33512	gi|347992087	ribose-Phosphate pyrophosphokinase	34.3	697.3	10	49.1	Yes	9.97	Cytoplasmic		Yes	Yes	Yes	Yes	Yes	Yes	Yes						Yes								Yes
146	EGY33619	gi|347992203	mannitol-1-phosphate 5-dehydrogenase	41.8	678.9	7	27.0		9.97	Cytoplasmic		Yes	Yes																Yes
152	EGY34518	gi|347993141	oxaloacetate decarboxylase alpha subunit	64.7	657.1	10	25.8		9.97	Cytoplasmic		Yes	Yes	Yes														Yes
158	EGY33240	gi|347991777	6-phosphofructokinase	35.2	651.2	9	41.7	Yes	9.97	Cytoplasmic		Yes	Yes	Yes	Yes	Yes	Yes	Yes								Yes			Yes			Yes			Yes
177	EGY33005	gi|347991542	FruA protein	57.4	560.6	5	21.5		10	CytoplasmicMembrane		Yes	Yes	Yes															Yes
182	EGY34315	gi|347992938	acetyl-CoA carboxylase, carboxyl transferase, alpha subunit	35.3	555.1	8	35.6		9.97	Cytoplasmic		Yes	Yes	Yes	Yes	Yes	Yes											Yes		Yes							Yes
196	EGY33406	gi|347991966	PTS system mannose/fructose/sorbose family IIC subunit	28.1	527.1	6	36.7		10	CytoplasmicMembrane		Yes	Yes	Yes													Yes		Yes
200	EGY33107	gi|347991644	triose-phosphate isomerase	27.7	505.2	6	40.3	Yes	9.26	Cytoplasmic		Yes	Yes	Yes	Yes	Yes	Yes	Yes								Yes			Yes
207	EGY33007	gi|347991544	multiphosphoryl transfer protein	53.2	474.7	5	19.4	Yes	9.26	Cytoplasmic		Yes	Yes	Yes															Yes
209	EGY32636	gi|347991137	2,3-bisphosphoglycerate-dependent phosphoglycerate mutase	18.7	468.2	9	45.4		8.96	Cytoplasmic		Yes	Yes	Yes	Yes	Yes	Yes	Yes		Yes						Yes									Yes
228	EGY32689	gi|347991196	fructose-1,6-bisphosphatase	37.3	397.7	7	26.6			Unknown		Yes	Yes	Yes	Yes	Yes	Yes									Yes			Yes			Yes			Yes
229	EGY34416	gi|347993039	acetyl-CoA carboxylase, carboxyl transferase, beta subunit	32.7	396.5	5	24.8		9.26	Cytoplasmic		Yes	Yes	Yes	Yes	Yes	Yes											Yes		Yes							Yes
234	EGY34862	gi|347993507	glucose-specific PTS system component	17.9	384.7	5	53.0	Yes	9.97	Cytoplasmic		Yes	Yes													Yes	Yes
236	EGY33114	gi|347991651	acetyl-CoA carboxylase, biotin carboxylase	49.0	377.2	6	16.5		9.97	Cytoplasmic		Yes	Yes	Yes	Yes	Yes	Yes											Yes		Yes							Yes
237	EGY34879	gi|347993524	glucose-6-phosphate isomerase	61.5	377.0	4	12.4		9.97	Cytoplasmic		Yes	Yes	Yes	Yes	Yes	Yes									Yes	Yes					Yes
266	EGY34310	gi|347992933	UDP-glucose 4-epimerase	37.2	328.4	5	17.5		9.26	Cytoplasmic		Yes	Yes	Yes	Yes												Yes
277	EGY35215	gi|347993886	phosphoglucosamine mutase	47.5	314.8	5	23.4		9.97	Cytoplasmic		Yes	Yes	Yes													Yes
314	EGY33629	gi|347992213	methylmalonate-semialdehyde dehydrogenase	54.3	262.2	2	12.7		9.97	Cytoplasmic		Yes	Yes	Yes																Yes
316	EGY34077	gi|347992692	pts system, N-acetylglucosamine-specific iibc component	52.3	259.9	4	10.5		10	CytoplasmicMembrane		Yes	Yes														Yes
333	EGY33635	gi|347992219	oxidoreductase domain protein	95.6	236.3	4	6.8		9.97	Cytoplasmic		Yes	Yes	Yes	Yes	Yes										Yes		Yes					Yes
335	EGY34729	gi|347993361	UDP-N-acetylglucosamine 1-carboxyvinyltransferase	45.5	230.6	4	16.3		9.97	Cytoplasmic		Yes	Yes	Yes													Yes
342	EGY35160	gi|347993831	Chb protein	43.2	221.0	3	15.5		9.44	Periplasmic		Yes	Yes	Yes	Yes												Yes
366	EGY34082	gi|347992697	N-acetylmannosamine kinase	31.2	190.3	3	20.4		9.26	Cytoplasmic		Yes	Yes	Yes	Yes												Yes
387	EGY34081	gi|347992696	putative N-acetylmannosamine-6-phosphate 2-epimerase	24.8	176.9	3	24.0		8.96	Cytoplasmic		Yes	Yes														Yes
391	EGY33194	gi|347991731	malate dehydrogenase	65.0	175.8	3	14.6		9.97	Cytoplasmic		Yes	Yes	Yes		Yes	Yes											Yes
397	EGY32635	gi|347991136	2,3-bisphosphoglycerate-dependent phosphoglycerate mutase	7.8	173.6	3	31.4			Unknown		Yes	Yes	Yes	Yes	Yes	Yes	Yes		Yes						Yes									Yes
406	EGY32430	gi|347990914	UTP-glucose-1-phosphate uridylyltransferase	32.3	168.1	2	11.2		9.97	Cytoplasmic		Yes	Yes	Yes	Yes												Yes
454	EGY33543	gi|347992118	seryl-tRNA synthetase	41.8	131.1	2	5.1		8.96	Cytoplasmic		Yes	Yes	Yes	Yes	Yes	Yes													Yes	Yes
438	EGY33780	gi|347992377	fumarate reductase flavoprotein subunit	66.3	141.2	2	4.5		9.99	CytoplasmicMembrane		Yes	Yes	Yes	Yes	Yes	Yes														Yes		Yes	Yes
487	EGY34302	gi|347992925	pts system maltose-and glucose-specific eiicb component	53.8	110.3	2	5.0		10	CytoplasmicMembrane		Yes	Yes													Yes
500	EGY34179	gi|347992802	NagC protein	32.8	101.3	2	7.9		9.97	Cytoplasmic		Yes	Yes		Yes												Yes
			Energy metabolism, oxidative phosphorylation
35	EGY34394	gi|347993017	Ndh protein	48.8	1841.3	24	61.3	Yes	7.88	CytoplasmicMembrane		Yes	Yes																					Yes
58	EGY33393	gi|347991953	F0F1 ATP synthase subunit alpha	55.6	1389.1	19	43.3	Yes	9.97	Cytoplasmic		Yes	Yes	Yes																				Yes
61	EGY33395	gi|347991955	ATP synthase F1, beta subunit	49.8	1336.9	16	58.6	Yes		Cytoplasmic	This protein may have multiple localization sites	Yes	Yes	Yes																				Yes
125	EGY33585	gi|347992169	cytochrome bd ubiquinol oxidase subunit I	58.4	771.6	10	24.0	Yes	10	CytoplasmicMembrane		Yes	Yes	Yes																				Yes
164	EGY33391	gi|347991951	F0F1 ATP synthase subunit B	14.9	622.7	10	70.4		9.82	CytoplasmicMembrane		Yes	Yes	Yes																				Yes
205	EGY33394	gi|347991954	F0F1 ATP synthase subunit gamma	31.8	482.3	6	34.9			Unknown	This protein may have multiple localization sites	Yes	Yes	Yes																				Yes
373	EGY33396	gi|347991956	ATP synthase F1, epsilon subunit	15.6	185.7	2	28.2		9.12	Cytoplasmic	This protein may have multiple localization sites	Yes	Yes	Yes																				Yes
468	EGY33390	gi|347991950	AtpE protein	8.7	123.3	2	21.4		10	CytoplasmicMembrane		Yes	Yes	Yes																				Yes
			Nucleotide metabolism
29	EGY34334	gi|347992957	hypothetical protein	54.4	1999.4	25	58.9	Yes	10	CytoplasmicMembrane		Yes	Yes	Yes																										Yes
1	EGY32992	gi|347991529	DNA-directed RNA polymerase, beta' subunit	157.9	4475.2	59	56.2	Yes	9.97	Cytoplasmic		Yes	Yes	Yes										Yes	Yes
5	EGY32993	gi|347991530	DNA-directed RNA polymerase, beta subunit	149.8	3836.8	45	48.1	Yes	9.97	Cytoplasmic		Yes	Yes	Yes										Yes	Yes
66	EGY33699	gi|347992290	NAD nucleotidase	66.6	1236.6	19	43.7	Yes	9.76	Periplasmic		Yes	Yes	Yes	Yes									Yes	Yes															Yes
82	EGY34660	gi|347993286	DNA-directed RNA polymerase, alpha subunit	36.4	1109.1	13	57.4	Yes	9.97	Cytoplasmic		Yes	Yes	Yes										Yes	Yes
94	EGY35219	gi|347993890	inosine-5'-monophosphate dehydrogenase	52.1	986.5	13	44.1		9.97	Cytoplasmic		Yes	Yes	Yes	Yes									Yes
100	EGY33135	gi|347991672	polynucleotide phosphorylase/polyadenylase	81.9	952.3	13	24.3	Yes	9.97	Cytoplasmic		Yes	Yes											Yes	Yes																				Yes
115	EGY35187	gi|347993858	adenylosuccinate synthetase	47.1	884.1	13	40.7		9.97	Cytoplasmic		Yes	Yes	Yes					Yes					Yes
134	EGY33161	gi|347991698	uracil phosphoribosyltransferase	22.6	725.7	10	54.3	Yes	9.97	Cytoplasmic		Yes	Yes	Yes											Yes
186	EGY32388	gi|347990872	GTP pyrophosphokinase	84.3	543.9	8	15.9		8.96	Cytoplasmic		Yes	Yes											Yes
197	EGY35254	gi|347993930	UMP kinase	25.7	524.7	7	39.7		9.97	Cytoplasmic		Yes	Yes	Yes											Yes
202	EGY34891	gi|347993536	ribonucleotide-diphosphate reductase subunit alpha	84.7	491.9	8	15.0		9.97	Cytoplasmic		Yes	Yes	Yes										Yes	Yes
330	EGY34263	gi|347992886	orotidine 5'-phosphate decarboxylase	25.3	238.2	4	27.8		9.97	Cytoplasmic		Yes	Yes	Yes											Yes
375	EGY34278	gi|347992901	adenine phosphoribosyltransferase	22.0	185.2	2	18.2		9.97	Cytoplasmic		Yes	Yes	Yes										Yes
394	EGY34213	gi|347992836	dGTP triphosphohydrolase	52.0	174.4	3	6.4		9.97	Cytoplasmic		Yes	Yes											Yes
399	EGY34307	gi|347992930	adenylate kinase	23.5	170.9	4	21.0		9.97	Cytoplasmic		Yes	Yes	Yes	Yes									Yes
420	EGY32745	gi|347991255	CTP synthase	60.0	156.6	2	9.4		9.97	Cytoplasmic		Yes	Yes	Yes											Yes
421	EGY34187	gi|347992810	thioredoxin-disulfide reductase	34.4	155.5	2	17.4		9.97	Cytoplasmic		Yes	Yes										Yes		Yes
479	EGY34624	gi|347993250	uridine phosphorylase	27.3	117.1	3	19.0		9.97	Cytoplasmic		Yes	Yes	Yes											Yes
496	EGY33902	gi|347992505	phosphoribosylformylglycinamidine cyclo-ligase	36.9	102.1	2	10.5		9.97	Cytoplasmic		Yes	Yes	Yes	Yes									Yes
501	EGY34051	gi|347992666	2',3'-cyclic-nucleotide 2'-phosphodiesterase	72.6	100.9	2	4.1		10	Periplasmic		Yes	Yes											Yes	Yes
			Biosynthesis and metabolism of amino acids
43	EGY32382	gi|347990866	aspartate ammonia-lyase	51.4	1711.0	22	65.7	Yes	9.97	Cytoplasmic		Yes	Yes	Yes					Yes
53	EGY33612	gi|347992196	serine hydroxymethyltransferase	45.8	1507.9	19	49.8	Yes	9.97	Cytoplasmic		Yes	Yes	Yes	Yes	Yes	Yes	Yes		Yes															Yes
55	EGY34250	gi|347992873	5-methyltetrahydropteroyltriglutamate--homocysteine S-methyltransferase	84.9	1452.1	21	36.6		8.96	Cytoplasmic		Yes	Yes	Yes	Yes			Yes			Yes		Yes
59	EGY32461	gi|347990945	D-fructose-6-phosphate amidotransferase	67.0	1383.8	20	48.9	Yes	9.97	Cytoplasmic		Yes	Yes	Yes	Yes				Yes								Yes
79	EGY35095	gi|347993757	transaldolase	35.1	1135.5	16	67.2	Yes	8.86	Cytoplasmic		Yes	Yes	Yes	Yes	Yes	Yes	Yes														Yes
96	EGY33159	gi|347991696	glutamate--cysteine ligase/gamma-glutamylcysteine synthetase	85.2	979.5	15	29.7		9.97	Cytoplasmic		Yes	Yes	Yes								Yes
108	EGY34711	gi|347993343	hypothetical protein	88.6	908.2	11	20.6		9.26	Cytoplasmic		Yes	Yes	Yes	Yes	Yes	Yes	Yes		Yes	Yes
129	EGY33981	gi|347992589	cysteine synthase A	28.4	756.8	10	58.2	Yes	9.26	Cytoplasmic		Yes	Yes	Yes		Yes	Yes	Yes			Yes
187	EGY32991	gi|347991528	phosphatidylserine synthase	52.9	543.6	8	22.9		9.97	Cytoplasmic		Yes	Yes	Yes						Yes																Yes
191	EGY34286	gi|347992909	glutathione S-transferase	22.7	532.6	8	71.9		9.26	Cytoplasmic		Yes	Yes									Yes
260	EGY34056	gi|347992671	gamma-glutamyltransferase	63.2	336.2	5	13.8		10	Periplasmic		Yes	Yes	Yes								Yes
261	EGY33182	gi|347991719	aspartate aminotransferase	45.4	335.8	5	18.1		9.97	Cytoplasmic		Yes	Yes	Yes	Yes			Yes	Yes
294	EGY34722	gi|347993354	glutamine synthetase, type I	52.3	281.8	4	17.7		9.97	Cytoplasmic		Yes	Yes	Yes		Yes		Yes	Yes
322	EGY33660	gi|347992244	aminotransferase, class I and II	42.5	250.4	4	16.1		9.97	Cytoplasmic		Yes	Yes	Yes	Yes			Yes
325	EGY35195	gi|347993866	cystathionine beta-lyase	44.1	245.8	4	10.9		9.97	Cytoplasmic		Yes	Yes	Yes	Yes			Yes			Yes		Yes
341	EGY34058	gi|347992673	argininosuccinate synthase	49.9	224.5	4	13.7		9.97	Cytoplasmic		Yes	Yes	Yes	Yes			Yes	Yes
444	EGY34018	gi|347992633	cytosol aminopeptidase	53.5	137.8	3	6.9		9.97	Cytoplasmic		Yes	Yes	Yes								Yes
			Lipid metabolism
34	EGY35003	gi|347993662	glycerophosphoryl diester phosphodiesterase	41.4	1843.0	28	73.1	Yes	8.89	Extracellular	This protein may have multiple localization sites	Yes	Yes																							Yes
118	EGY33052	gi|347991589	3-ketoacyl-acyl carrier protein reductase	25.5	855.6	9	48.3	Yes	9.26	Cytoplasmic		Yes	Yes	Yes																							Yes
126	EGY34995	gi|347993654	glycerol-3-phosphate acyltransferase	92.9	767.2	12	22.4		7.88	CytoplasmicMembrane		Yes	Yes	Yes																						Yes
168	EGY33041	gi|347991578	phosphatidylserine decarboxylase	32.9	578.7	6	31.1		9.82	CytoplasmicMembrane		Yes	Yes	Yes																						Yes
172	EGY34393	gi|347993016	glycerol-3-phosphate dehydrogenase	58.1	572.5	9	25.9		9.97	Cytoplasmic		Yes	Yes																							Yes
175	EGY33051	gi|347991588	malonyl CoA-acyl carrier protein transacylase	33.3	570.9	7	49.0		9.97	Cytoplasmic		Yes	Yes	Yes																							Yes
223	EGY32317	gi|347990779	Beta-ketoacyl synthase	42.6	410.5	4	20.4		9.97	Cytoplasmic		Yes	Yes	Yes																							Yes
274	EGY33378	gi|347991938	hypothetical protein	36.5	316.5	4	20.4		9.97	Cytoplasmic		Yes	Yes																							Yes
471	EGY34445	gi|347993068	2-acyl-glycerophospho-ethanolamine acyltransferase	127.1	122.3	2	2.9		10	CytoplasmicMembrane		Yes	Yes																							Yes
474	EGY33049	gi|347991586	fatty acid/phospholipid synthesis protein PlsX	36.5	121.8	2	10.9		9.26	Cytoplasmic		Yes	Yes	Yes																						Yes
			Glycan biosynthesis and metabolism
166	EGY34207	gi|347992830	bifunctional protein HldE	51.8	604.9	8	26.5		9.97	Cytoplasmic		Yes	Yes	Yes																								Yes
226	EGY35209	gi|347993880	3-deoxy-8-phosphooctulonate synthase	30.9	401.1	4	32.7		9.97	Cytoplasmic		Yes	Yes	Yes																								Yes
242	EGY35267	gi|347993943	lipid-A-disaccharide synthase	44.2	374.1	5	29.2		9.97	Cytoplasmic		Yes	Yes	Yes																								Yes
256	EGY35265	gi|347993941	UDP-N-acetylglucosamine acyltransferase	28.6	337.8	5	26.7		9.97	Cytoplasmic		Yes	Yes	Yes																								Yes
273	EGY33697	gi|347992288	ADP-glyceromanno-heptose 6-epimerase	34.7	317.0	4	18.8		9.97	Cytoplasmic		Yes	Yes	Yes																								Yes
379	EGY33820	gi|347992417	phosphoheptose isomerase	21.3	180.8	3	17.5		9.97	Cytoplasmic		Yes	Yes	Yes																								Yes
475	EGY34206	gi|347992829	lipid A biosynthesis lauroyl acyltransferase	35.7	119.5	2	15.1		7.88	CytoplasmicMembrane		Yes	Yes	Yes																								Yes
			Metabolism of cofactors and vitamins
60	EGY32476	gi|347990960	HemX protein	51.0	1354.1	17	49.9	Yes		Unknown		Yes	Yes	Yes	Yes																								Yes
117	EGY34335	gi|347992958	pyridine nucleotide transhydrogenase	50.3	857.1	11	27.8	Yes	10	CytoplasmicMembrane		Yes	Yes	Yes																										Yes
192	EGY34450	gi|347993073	ferritin like protein-1	18.7	532.0	7	47.2	Yes	9.97	Cytoplasmic		Yes	Yes																										Yes
296	EGY34451	gi|347993074	ferritin like protein-2	18.9	279.4	5	49.7		9.26	Cytoplasmic		Yes	Yes																										Yes
370	EGY32805	gi|347991323	glutamate-1-semialdehyde-2,1-aminomutase	45.8	187.8	4	19.0		9.97	Cytoplasmic		Yes	Yes	Yes	Yes																								Yes
446	EGY34712	gi|347993344	nicotinamide phosphoribosyltransferase	52.9	137.5	2	4.7		8.96	Cytoplasmic		Yes	Yes	Yes																										Yes
460	EGY34413	gi|347993036	1-deoxy-D-xylulose-5-phosphate synthase	67.6	127.2	2	6.3		9.97	Cytoplasmic		Yes	Yes	Yes	Yes																										Yes
			Other metabolic functions
38	EGY35394	gi|347994075	penicillin-binding protein 1A	93.9	1785.1	23	39.0	Yes	9.82	CytoplasmicMembrane		Yes	Yes	Yes
157	EGY33589	gi|347992173	protein TolQ	25.5	653.6	9	40.6	Yes	10	CytoplasmicMembrane		Yes	Yes			Yes
210	EGY32629	gi|347991130	acid phosphatase/phosphotransferase	26.3	465.1	8	51.1			Unknown	This protein may have multiple localization sites	Yes	Yes			Yes
244	EGY35401	gi|347994082	phosphopantothenoylcysteine decarboxylase/phosphopantothenate--cysteine ligase	42.7	369.6	3	19.0		9.97	Cytoplasmic		Yes	Yes	Yes
300	EGY32720	gi|347991227	octaprenyl-diphosphate synthase	35.3	277.0	4	26.9		9.97	Cytoplasmic		Yes	Yes		Yes
320	EGY33108	gi|347991645	naphthoate synthase	31.7	253.2	3	13.0		9.97	Cytoplasmic		Yes	Yes	Yes	Yes
352	EGY34220	gi|347992843	ascorbate-specific PTS system enzyme IIC	47.5	206.2	3	13.1		10	CytoplasmicMembrane		Yes	Yes	Yes		Yes
369	EGY34177	gi|347992800	GTP cyclohydrolase II	24.2	188.2	3	24.9		9.97	Cytoplasmic		Yes	Yes	Yes
380	EGY34164	gi|347992787	dTDP-D-glucose 4,6-dehydratase	40.0	180.8	3	16.3		9.97	Cytoplasmic		Yes	Yes	Yes	Yes
386	EGY33062	gi|347991599	DacC protein	43.9	177.0	3	9.3		9.97	Cytoplasmic		Yes	Yes	Yes
389	EGY35257	gi|347993933	1-deoxy-D-xylulose 5-phosphate reductoisomerase	46.5	176.5	3	5.9		9.82	CytoplasmicMembrane		Yes	Yes	Yes	Yes
395	EGY34166	gi|347992789	dTDP-4-keto-L-rhamnose reductase	31.9	174.3	3	20.5		9.97	Cytoplasmic		Yes	Yes	Yes	Yes
407	EGY34314	gi|347992937	pyridoxal kinase	31.2	167.6	2	13.7		9.97	Cytoplasmic		Yes	Yes	Yes
449	EGY34878	gi|347993523	alanine racemase	39.3	134.7	3	17.8		9.97	Cytoplasmic		Yes	Yes	Yes
461	EGY34075	gi|347992690	biotin synthase	36.9	126.9	2	10.2		9.97	Cytoplasmic		Yes	Yes	Yes
481	EGY35173	gi|347993844	SuhB protein	28.8	113.9	2	12.5		9.97	Cytoplasmic		Yes	Yes	Yes	Yes
			Genetic information processing, translation
13	EGY34259	gi|347992882	ribosomal protein S1	59.4	2860.1	33	60.0	Yes	9.97	Cytoplasmic		Yes	Yes																													Yes
69	EGY34638	gi|347993264	ribosomal protein L2	29.9	1193.4	18	58.6	Yes	9.97	Cytoplasmic		Yes	Yes																													Yes
80	EGY34659	gi|347993285	ribosomal protein S4	23.5	1113.7	15	58.7	Yes	9.97	Cytoplasmic		Yes	Yes																													Yes
89	EGY34641	gi|347993267	ribosomal protein S3	25.9	1063.3	16	64.7	Yes	9.97	Cytoplasmic		Yes	Yes																													Yes
110	EGY32392	gi|347990876	30S ribosomal protein S2	26.3	900.2	12	75.8		9.97	Cytoplasmic		Yes	Yes																													Yes
135	EGY35235	gi|347993911	ribosomal protein S7	17.6	721.1	11	63.5		9.97	Cytoplasmic		Yes	Yes																													Yes
143	EGY32996	gi|347991533	ribosomal protein L1	24.1	684.5	8	46.3	Yes	9.97	Cytoplasmic		Yes	Yes																													Yes
144	EGY34647	gi|347993273	50S ribosomal protein L5	20.3	684.2	11	54.2	Yes	9.97	Cytoplasmic		Yes	Yes																													Yes
151	EGY34636	gi|347993262	ribosomal protein L4/L1 family	22.0	660.7	8	50.0	Yes	9.97	Cytoplasmic		Yes	Yes																													Yes
180	EGY34635	gi|347993261	ribosomal protein L3	22.3	558.8	7	44.7	Yes	9.97	Cytoplasmic		Yes	Yes																													Yes
181	EGY34650	gi|347993276	50S ribosomal protein L6	19.0	557.9	9	62.7	Yes	9.26	Cytoplasmic		Yes	Yes																													Yes
184	EGY34652	gi|347993278	30S ribosomal protein S5	17.4	549.3	7	50.0	Yes	9.26	Cytoplasmic		Yes	Yes																													Yes
185	EGY34657	gi|347993283	ribosomal protein S13p/S18e	13.2	544.1	10	65.3		9.97	Cytoplasmic		Yes	Yes																													Yes
193	EGY35012	gi|347993671	50S ribosomal protein L19	13.2	530.8	8	67.2	Yes	9.97	Cytoplasmic		Yes	Yes																													Yes
201	EGY35236	gi|347993912	ribosomal protein S12	16.1	503.4	4	34.3		9.97	Cytoplasmic		Yes	Yes																													Yes
204	EGY34649	gi|347993275	ribosomal protein S8	14.0	484.0	6	60.8		9.26	Cytoplasmic		Yes	Yes																													Yes
212	EGY34997	gi|347993656	ribosomal protein S6	14.5	458.1	5	50.4	Yes	9.97	Cytoplasmic		Yes	Yes																													Yes
222	EGY34658	gi|347993284	30S ribosomal protein S11	13.9	411.7	6	48.8	Yes	9.26	Cytoplasmic		Yes	Yes																													Yes
239	EGY34645	gi|347993271	50S ribosomal protein L14	13.5	376.5	5	44.7		9.97	Cytoplasmic		Yes	Yes																													Yes
254	EGY34654	gi|347993280	ribosomal protein L15	15.2	338.5	5	38.2	Yes	9.97	Cytoplasmic		Yes	Yes																													Yes
257	EGY32719	gi|347991226	ribosomal protein L21	11.3	336.9	6	42.7	Yes	9.97	Cytoplasmic		Yes	Yes																													Yes
259	EGY34640	gi|347993266	ribosomal protein L22	12.2	336.3	7	58.2		9.97	Cytoplasmic		Yes	Yes																													Yes
269	EGY34403	gi|347993026	ribosomal protein L20	10.0	322.8	6	48.3		9.26	Cytoplasmic		Yes	Yes																													Yes
276	EGY32997	gi|347991534	50S ribosomal protein L11	14.9	315.9	5	29.6		9.26	Cytoplasmic		Yes	Yes																													Yes
279	EGY34634	gi|347993260	RpsJ protein	11.8	308.8	4	35.0		9.97	Cytoplasmic		Yes	Yes																													Yes
280	EGY34642	gi|347993268	50S ribosomal protein L16	15.2	306.8	4	39.0		9.97	Cytoplasmic		Yes	Yes																													Yes
308	EGY34559	gi|347993182	30S ribosomal protein S9	14.7	264.7	4	26.2	Yes	9.97	Cytoplasmic		Yes	Yes																													Yes
311	EGY34661	gi|347993287	ribosomal protein L17	14.5	263.5	4	24.8		9.97	Cytoplasmic		Yes	Yes																													Yes
324	EGY32994	gi|347991531	ribosomal protein L7/L12	12.4	246.6	3	32.5			Unknown	This protein may have multiple localization sites	Yes	Yes																													Yes
334	EGY35000	gi|347993659	ribosomal protein L9	16.1	231.0	4	24.8		9.97	Cytoplasmic		Yes	Yes																													Yes
367	EGY35404	gi|347994085	RpmB protein	9.0	188.2	3	34.6		9.26	Cytoplasmic		Yes	Yes																													Yes
385	EGY34639	gi|347993265	30S ribosomal protein S19	10.3	177.2	3	45.1		9.26	Cytoplasmic		Yes	Yes																													Yes
426	EGY34644	gi|347993270	ribosomal protein S17	9.8	153.1	3	31.8		9.97	Cytoplasmic		Yes	Yes																													Yes
431	EGY34637	gi|347993263	ribosomal protein L23	11.1	147.1	2	31.0		9.26	Cytoplasmic		Yes	Yes																													Yes
476	EGY34560	gi|347993183	ribosomal protein L13	15.9	117.7	2	21.8		9.97	Cytoplasmic		Yes	Yes																													Yes
502	EGY32679	gi|347991186	30S ribosomal protein S20	9.6	100.9	2	12.6		9.26	Cytoplasmic		Yes	Yes																													Yes
63	EGY35327	gi|347994008	glycyl-tRNA synthetase beta subunit	76.6	1287.1	16	40.6		9.97	Cytoplasmic		Yes	Yes																														Yes
75	EGY34399	gi|347993022	threonyl-tRNA synthetase	73.9	1167.0	18	31.1	Yes	10	Cytoplasmic		Yes	Yes																														Yes
81	EGY34491	gi|347993114	phenylalanyl-tRNA synthetase, beta subunit	87.5	1112.0	15	31.7		9.97	Cytoplasmic		Yes	Yes																														Yes
98	EGY34538	gi|347993161	asparaginyl-tRNA synthetase	52.7	969.7	14	36.0	Yes	10	Cytoplasmic		Yes	Yes																														Yes
105	EGY32433	gi|347990917	alanyl-tRNA synthetase	96.6	921.3	15	24.0		9.97	Cytoplasmic		Yes	Yes																														Yes
113	EGY35371	gi|347994052	leucyl-tRNA synthetase	98.2	886.4	11	22.2		9.97	Cytoplasmic		Yes	Yes																														Yes
183	EGY35163	gi|347993834	methionyl-tRNA synthetase	77.1	553.4	7	16.3		9.97	Cytoplasmic		Yes	Yes										Yes																				Yes
195	EGY33455	gi|347992019	ProS protein	63.5	528.3	7	21.5		10	Cytoplasmic		Yes	Yes																														Yes
224	EGY35333	gi|347994014	glycyl-tRNA synthetase subunit alpha	34.4	409.8	6	34.2		9.97	Cytoplasmic		Yes	Yes																														Yes
271	EGY34430	gi|347993053	glutaminyl-tRNA synthetase	64.8	321.8	5	14.9		9.97	Cytoplasmic		Yes	Yes	Yes																													Yes
286	EGY33527	gi|347992102	seryl-tRNA synthetase	48.8	298.2	3	14.4		10	Cytoplasmic		Yes	Yes																														Yes
353	EGY32867	gi|347991391	valyl-tRNA synthetase	108.6	204.1	4	7.1		9.97	Cytoplasmic		Yes	Yes																														Yes
355	EGY34492	gi|347993115	phenylalanyl-tRNA synthetase, alpha subunit	37.9	200.1	4	16.4		10	Cytoplasmic		Yes	Yes																														Yes
			Genetic information processing, folding, sorting and degradation
50	EGY33639	gi|347992223	protein-export membrane protein SecD	66.8	1531.6	18	39.3	Yes	10	CytoplasmicMembrane		Yes	Yes																															Yes
88	EGY35376	gi|347994057	preprotein translocase, SecA subunit	102.4	1075.3	17	27.5	Yes	9.12	Cytoplasmic	This protein may have multiple localization sites	Yes	Yes																															Yes
123	EGY33233	gi|347991770	LepB protein	39.1	775.7	10	36.5	Yes	10	CytoplasmicMembrane		Yes	Yes																															Yes
138	EGY33228	gi|347991765	putative inner membrane protein translocase component YidC	61.4	714.3	9	22.1	Yes	10	CytoplasmicMembrane		Yes	Yes																															Yes
167	EGY33638	gi|347992222	protein-export membrane protein SecF	37.1	599.2	6	22.2		10	CytoplasmicMembrane		Yes	Yes																															Yes
171	EGY35353	gi|347994034	signal recognition particle protein	50.6	576.1	7	24.0		7.88	CytoplasmicMembrane		Yes	Yes																															Yes
233	EGY32621	gi|347991122	cell division protein FtsY	52.2	385.8	7	15.4		9.12	Cytoplasmic	This protein may have multiple localization sites	Yes	Yes																															Yes
327	EGY33377	gi|347991937	protein-export chaperone SecB	19.3	243.4	3	25.3		9.97	Cytoplasmic		Yes	Yes																															Yes
458	EGY35323	gi|347994004	pep:novel supercontig:GCA_000226755.2:contig00003:14060:14290:1 gene:SC1083_0018 transcript:EGY35323 description:"Tat family twin arginine targeting protein TatA"	8.5	129.2	2	25.0		10	CytoplasmicMembrane		Yes	Yes																															Yes
478	EGY34655	gi|347993281	preprotein translocase, SecY subunit	48.1	117.3	2	5.2		10	CytoplasmicMembrane		Yes	Yes																															Yes
485	EGY33640	gi|347992224	preprotein translocase subunit YajC	11.0	111.8	2	22.2		10	CytoplasmicMembrane		Yes	Yes																															Yes
12	EGY35202	gi|347993873	heat shock protein 70	68.4	2928.9	37	69.1	Yes	9.97	Cytoplasmic		Yes	Yes																																Yes
14	EGY32379	gi|347990863	chaperonin GroL	57.4	2368.3	31	69.8	Yes	9.97	Cytoplasmic		Yes	Yes																																Yes
19	EGY32702	gi|347991209	ribonuclease E	108.8	2627.9	34	56.1	Yes	9.97	Cytoplasmic		Yes	Yes																																Yes
91	EGY33137	gi|347991674	ATP-dependent RNA helicase	67.2	1037.1	16	37.8	Yes	9.97	Cytoplasmic		Yes	Yes																																Yes
114	EGY33055	gi|347991592	transcription termination factor Rho	45.9	885.8	12	38.1	Yes	9.97	Cytoplasmic		Yes	Yes																																Yes
263	EGY35008	gi|347993667	ribonuclease R	90.8	333.9	6	7.9		9.97	Cytoplasmic		Yes	Yes																																Yes
376	EGY34848	gi|347993493	RNA-binding protein Hfq	11.0	184.4	2	42.9		9.26	Cytoplasmic		Yes	Yes																																Yes
457	EGY33056	gi|347991593	ATP-dependent RNA helicase RhlB	47.3	129.5	2	14.1		9.97	Cytoplasmic		Yes	Yes																																Yes
77	EGY35170	gi|347993841	cysteine desulfurase IscS	45.0	1158.1	16	55.9	Yes	9.97	Cytoplasmic		Yes	Yes																												Yes					Yes
			Genetic information processing, replication and repair
147	EGY33223	gi|347991760	DNA polymerase III, beta subunit	41.5	668.5	9	33.3	Yes	9.97	Cytoplasmic		Yes	Yes	Yes										Yes	Yes																						Yes	Yes	Yes
159	EGY35091	gi|347993753	protein RecA	37.9	645.9	9	41.2		9.97	Cytoplasmic		Yes	Yes																																		Yes
328	EGY35382	gi|347994063	single-strand DNA-binding protein	17.8	243.0	3	25.2		9.26	Cytoplasmic		Yes	Yes																																		Yes	Yes	Yes
498	EGY34770	gi|347993406	single strand binding protein	16.4	101.5	3	17.9		9.26	Cytoplasmic		Yes	Yes																																		Yes	Yes	Yes
304	EGY33016	gi|347991553	DNA mismatch repair protein MutS	97.1	273.0	3	8.7		9.97	Cytoplasmic		Yes	Yes																																			Yes
388	EGY35381	gi|347994062	excinuclease ABC, A subunit	104.2	176.6	4	6.6		9.97	Cytoplasmic		Yes	Yes
			Environmental information processing, signal transduction
301	EGY33721	gi|347992312	regulatory protein UhpC	49.7	276.5	5	16.6		10	CytoplasmicMembrane		Yes	Yes
424	EGY32441	gi|347990925	OmpR protein	25.9	154.8	2	13.4		9.97	Cytoplasmic		Yes	Yes
463	EGY32708	gi|347991215	TorCAD operon transcriptional regulatory protein TorR	27.4	124.6	2	15.3		9.97	Cytoplasmic		Yes	Yes
465	EGY33526	gi|347992101	C4-dicarboxylate membrane transporter	59.8	123.8	2	4.7		10	CytoplasmicMembrane		Yes	Yes
467	EGY33375	gi|347991935	anaerobic C4-dicarboxylate membrane transporter	46.7	123.4	2	4.3		10	CytoplasmicMembrane		Yes	Yes
492	EGY34055	gi|347992670	sensor protein QseC	52.2	105.4	2	7.2		10	CytoplasmicMembrane		Yes	Yes
			Environmental information processing, membrane transport
102	EGY34861	gi|347993506	phosphoenolpyruvate-protein phosphotransferase	63.5	947.4	13	37.0	Yes	9.97	Cytoplasmic		Yes	Yes
44	EGY33529	gi|347992104	spermidine/putrescine-binding periplasmic protein 1 precursor	43.7	1706.7	21	71.0	Yes	9.44	Periplasmic		Yes	Yes
48	EGY32664	gi|347991165	D-methionine-binding lipoprotein MetQ	30.0	1609.8	19	56.2	Yes	9.97	CytoplasmicMembrane		Yes	Yes
65	EGY32666	gi|347991167	D-methionine ABC transporter, ATP-binding protein	37.7	1246.0	16	60.6		7.88	CytoplasmicMembrane		Yes	Yes
106	EGY35175	gi|347993846	ferric transporter ATP-binding subunit	38.7	914.4	11	47.1	Yes	10	CytoplasmicMembrane		Yes	Yes
174	EGY33532	gi|347992107	putrescine/spermidine ABC transporter ATPase protein	42.3	571.6	7	29.8	Yes	7.88	CytoplasmicMembrane		Yes	Yes
188	EGY33363	gi|347991923	L-cystine import ATP-binding protein TcyN	28.7	540.1	8	47.8		10	CytoplasmicMembrane		Yes	Yes
198	EGY33362	gi|347991922	glutamine-binding periplasmic protein/glutamine transport system permease protein	26.8	522.8	7	26.7		10	CytoplasmicMembrane		Yes	Yes
231	EGY34232	gi|347992855	putative ABC-type chelated iron transport system, ATPase component	32.7	390.7	6	32.1		10	CytoplasmicMembrane		Yes	Yes
235	EGY32403	gi|347990887	ferric iron binding protein	36.3	378.9	7	32.5		10	Periplasmic		Yes	Yes
247	EGY34233	gi|347992856	putative periplasmic chelated iron binding protein	32.5	359.9	5	27.6		10	Periplasmic		Yes	Yes
249	EGY34350	gi|347992973	lipid A export permease/ATP-binding protein MsbA	64.4	353.7	5	12.0		10	CytoplasmicMembrane		Yes	Yes
282	EGY35178	gi|347993849	cystathionine beta-lyase	37.7	305.1	6	20.5		9.76	Periplasmic		Yes	Yes
346	EGY34019	gi|347992634	molybdate ABC transporter, ATP-binding protein	39.8	216.6	3	17.8		9.99	CytoplasmicMembrane		Yes	Yes
349	EGY34072	gi|347992687	thiamine ABC transporter, ATP-binding protein	23.2	211.7	3	24.2		9.98	CytoplasmicMembrane	This protein may have multiple localization sites	Yes	Yes
360	EGY34185	gi|347992808	ABC transporter, CydDC cysteine exporter	64.4	195.6	3	7.6		10	CytoplasmicMembrane		Yes	Yes
363	EGY34016	gi|347992631	conserved permease	40.0	193.2	2	11.8		10	CytoplasmicMembrane		Yes	Yes
374	EGY34186	gi|347992809	cysteine/glutathione ABC transporter membrane/ATP-binding component	65.5	185.4	2	7.5		10	CytoplasmicMembrane		Yes	Yes
381	EGY34874	gi|347993519	lipoprotein releasing system, transmembrane protein LolE	46.2	178.9	2	16.6		10	CytoplasmicMembrane		Yes	Yes
382	EGY33861	gi|347992461	maltose/maltodextrin import ATP-binding protein MalK	41.3	178.3	2	13.2		9.99	CytoplasmicMembrane		Yes	Yes
419	EGY35176	gi|347993847	binding-protein-dependent transport systems inner membrane component	75.3	158.0	3	5.1		10	CytoplasmicMembrane		Yes	Yes
428	EGY34745	gi|347993377	ABC transporter, ATP-binding protein	26.8	151.6	2	8.7		9.12	Cytoplasmic	This protein may have multiple localization sites	Yes	Yes
433	EGY35252	gi|347993928	ABC transporter ATP-binding protein	69.5	146.3	2	7.1		10	CytoplasmicMembrane		Yes	Yes
451	EGY32492	gi|347990976	monosaccharide-transporting ATPase	33.5	132.8	2	8.9		9.76	Periplasmic		Yes	Yes
473	EGY33862	gi|347992462	maltose ABC transporter periplasmic protein	43.4	121.9	2	6.8		9.76	Periplasmic		Yes	Yes
504	EGY32665	gi|347991166	D-methionine transport system permease protein MetI	24.6	100.4	2	9.8		10	CytoplasmicMembrane		Yes	Yes
			No KEGG annotation using the genome of A. actionmycetemcomitans D7S as template
3	EGY33571	gi|347992155	outer membrane protein 64	72.0	4080.7	51	73.2	Yes	10	OuterMembrane		Yes
4	EGY35261	gi|347993937	outer membrane protein assembly complex, YaeT protein	88.3	3849.6	44	66.7	Yes	10	OuterMembrane		Yes
6	EGY33615	gi|347992199	leukotoxin	113.9	3789.3	50	53.5	Yes	10	Extracellular		Yes
9	EGY34391	gi|347993014	LppC family lipoprotein	63.2	3257.3	36	69.2	Yes		Unknown		Yes
10	EGY33838	gi|347992435	tight adherence protein G	59.3	3221.0	42	53.3	Yes		Unknown		Yes
11	EGY32758	gi|347991272	OmpA-like outer membrane protein	36.9	3011.6	33	77.7	Yes	10	OuterMembrane		Yes
15	EGY33724	gi|347992315	biofilm PGA synthesis lipoprotein PgaB	72.9	2785.2	34	72.5	Yes		Unknown		No
16	EGY33725	gi|347992316	biofilm PGA synthesis protein PgaA precursor	91.0	2729.2	39	60.4	Yes		Unknown		Yes
18	EGY33831	gi|347992428	flp operon protein D	41.6	2648.7	30	67.1	Yes	8.96	Cytoplasmic		Yes
20	EGY35196	gi|347993867	outer membrane protein 39	39.0	2612.2	31	75.1	Yes	10	OuterMembrane		Yes
21	EGY33970	gi|347992578	ATP-dependent protease La	89.9	2582.2	34	56.1	Yes	9.97	Cytoplasmic		Yes
22	EGY32844	gi|347991368	alpha-2-macroglobulin domain protein	181.2	2533.9	34	33.6	Yes		Unknown		Yes
24	EGY35234	gi|347993910	elongation factor G	77.3	2476.5	29	65.6	Yes	9.97	Cytoplasmic		Yes
25	EGY33592	gi|347992176	translocation protein TolB	45.5	2214.6	29	72.8	Yes	9.76	Periplasmic		Yes
27	EGY34202	gi|347992825	HflC protein	34.2	2169.8	25	74.0	Yes	8.96	Cytoplasmic		Yes
28	EGY34295	gi|347992918	outer membrane protein A	38.2	2010.4	24	66.6	Yes	10	OuterMembrane		Yes
30	EGY33829	gi|347992426	GspD protein	50.1	1928.9	26	64.3	Yes	10	OuterMembrane		Yes
31	EGY32827	gi|347991351	TonB-dependent siderophore receptor	78.7	1928.6	23	50.3	Yes	10	OuterMembrane		Yes
32	EGY33479	gi|347992049	organic solvent tolerance protein	93.6	1927.2	25	40.9	Yes	10	OuterMembrane		Yes
36	EGY33832	gi|347992429	tight adherence protein A	47.1	1802.8	20	67.4	Yes	9.97	Cytoplasmic		Yes
39	EGY35122	gi|347993787	DsbB family disulfide bond formation protein	56.4	1751.0	22	54.7	Yes	10	CytoplasmicMembrane		Yes
40	EGY33835	gi|347992432	putative nonspecific tight adherence protein D	28.4	1743.9	22	65.2	Yes		Unknown		Yes
47	EGY35203	gi|347993874	hypothetical protein	52.9	1623.4	23	62.8	Yes	9.82	CytoplasmicMembrane		Yes
49	EGY33115	gi|347991652	lipoprotein, putative	26.6	1567.1	19	67.3	Yes		Unknown		Yes
51	EGY33160	gi|347991697	SurA protein	68.0	1522.6	19	52.2	Yes	9.82	CytoplasmicMembrane		Yes
52	EGY35213	gi|347993884	hypothetical protein	17.0	1517.0	18	61.3	Yes		Unknown		Yes
54	EGY33828	gi|347992425	flp operon protein C	30.5	1490.3	17	65.0	Yes		Unknown		Yes
57	EGY34427	gi|347993050	putative TdeA	51.1	1396.9	19	50.3	Yes	9.95	OuterMembrane		Yes
62	EGY34296	gi|347992919	protease DegQ	48.8	1295.9	15	50.4	Yes	9.76	Periplasmic		Yes
64	EGY34369	gi|347992992	signal peptide peptidase SppA, 67K type	69.6	1261.0	16	38.4	Yes	9.82	CytoplasmicMembrane		Yes
67	EGY34706	gi|347993338	HflK protein	46.6	1221.5	16	56.8	Yes	8.96	Cytoplasmic		Yes
68	EGY35418	gi|347994099	acriflavine resistance protein	111.2	1216.2	16	19.7	Yes	10	CytoplasmicMembrane		Yes
71	EGY33703	gi|347992294	outer membrane protein 18/16	20.3	1191.8	16	51.9	Yes	9.52	OuterMembrane		Yes
72	EGY35174	gi|347993845	hypothetical protein	79.2	1188.5	15	33.0		9.49	OuterMembrane		Yes
73	EGY34705	gi|347993337	HflC protein	33.0	1185.1	13	56.9	Yes	8.96	Cytoplasmic		Yes
74	EGY34726	gi|347993358	FadL protein	51.9	1169.7	15	35.8	Yes	10	OuterMembrane		Yes
76	EGY33192	gi|347991729	factor H-binding protein	28.1	1161.5	14	56.3	Yes		Unknown		Yes
78	EGY32683	gi|347991190	P4 lipoprotein	29.8	1150.9	11	63.0	Yes		Unknown		Yes
83	EGY35009	gi|347993668	Rod shape-determining protein MreB	37.6	1101.4	15	63.2		9.97	Cytoplasmic		Yes
84	EGY32420	gi|347990904	thiamine biosynthesis lipoprotein ApbE	39.7	1095.2	15	53.0	Yes		Unknown		Yes
85	EGY34615	gi|347993241	hypothetical protein	26.7	1089.1	16	73.6	Yes	9.52	OuterMembrane		Yes
86	EGY33837	gi|347992434	tight adherence protein F	21.9	1087.5	11	42.7	Yes		Unknown		Yes
87	EGY32631	gi|347991132	heat shock protein HslVU, ATPase subunit HslU	49.5	1080.8	15	45.1	Yes	9.97	Cytoplasmic		Yes
92	EGY33370	gi|347991930	peroxiredoxin like protein	26.9	1006.7	14	64.5	Yes	8.86	Cytoplasmic		Yes
99	EGY33800	gi|347992397	cell division protein FtsZ	44.7	960.9	11	49.2	Yes		Cytoplasmic	This protein may have multiple localization sites	Yes
101	EGY33486	gi|347992056	DNA gyrase, B subunit	90.0	949.8	14	25.9	Yes	9.26	Cytoplasmic		Yes
103	EGY35206	gi|347993877	outer membrane lipoprotein pcp	15.0	936.1	11	66.2	Yes	9.92	OuterMembrane		Yes
104	EGY33593	gi|347992177	peptidoglycan-associated lipoprotein	16.7	934.6	8	56.8	Yes	10	OuterMembrane		Yes
107	EGY34720	gi|347993352	autotransporter adhesin precursor	106.3	913.4	12	20.5		9.83	OuterMembrane	This protein may have multiple localization sites	Yes
109	EGY33155	gi|347991692	ATP-dependent Clp protease, ATP-binding subunit ClpX	45.7	906.2	13	41.8		9.97	Cytoplasmic		Yes
111	EGY34193	gi|347992816	outer membrane protein	21.1	899.9	10	53.0		9.92	OuterMembrane		Yes
112	EGY32625	gi|347991126	HtpX protein	27.9	896.6	9	45.5			Unknown		Yes
116	EGY33451	gi|347992015	lipoprotein, putative	34.1	874.6	13	50.0	Yes		Unknown		Yes
119	EGY34323	gi|347992946	transcription elongation factor NusA	55.6	850.8	10	34.1		9.97	Cytoplasmic		Yes
120	EGY33797	gi|347992394	heat shock protein 90	71.0	827.1	10	24.6	Yes	9.97	Cytoplasmic		Yes
121	EGY32754	gi|347991268	thioredoxin peroxidase	17.5	812.2	7	91.6	Yes	9.44	Periplasmic		Yes
122	EGY35417	gi|347994098	AcrA protein	43.0	777.2	10	33.9	Yes	9.82	CytoplasmicMembrane		Yes
124	EGY34986	gi|347993645	outer membrane antigenic lipoprotein B	41.0	773.0	10	34.7	Yes	8.86	OuterMembrane		Yes
127	EGY34388	gi|347993011	OsmY protein	20.9	764.2	9	51.8	Yes	9.76	Periplasmic		Yes
128	EGY34289	gi|347992912	putative adhesin/invasin	32.0	761.5	12	31.2	Yes	9.93	OuterMembrane		Yes
130	EGY32477	gi|347990961	HemY protein	46.8	739.0	10	34.2	Yes	9.97	CytoplasmicMembrane		Yes
131	EGY34397	gi|347993020	SmpA/OmlA domain-containing protein	30.7	734.3	10	50.7		9.92	OuterMembrane		Yes
133	EGY34080	gi|347992695	anaerobic C4-dicarboxylate transporter	36.3	725.9	7	45.7		9.76	Periplasmic		Yes
136	EGY33860	gi|347992460	maltoporin	48.4	716.5	10	29.3		10	OuterMembrane		Yes
139	EGY35021	gi|347993680	lipoprotein	29.7	714.2	8	44.7	Yes	9.93	OuterMembrane		Yes
140	EGY32633	gi|347991134	lipoprotein VacJ	28.6	702.4	9	58.1	Yes	9.92	OuterMembrane		Yes
141	EGY33727	gi|347992318	pyrimidine nucleoside transport protein	43.7	700.8	6	19.2		10	CytoplasmicMembrane		Yes
145	EGY33220	gi|347991757	copper/zinc superoxide dismutase	20.2	682.6	8	46.1	Yes	10	Periplasmic		Yes
148	EGY34442	gi|347993065	lipoprotein HlpB	21.9	667.6	9	58.9	Yes		Unknown		Yes
149	EGY34582	gi|347993205	ATP-dependent metallopeptidase HflB	71.8	666.9	9	21.7		10	CytoplasmicMembrane		Yes
150	EGY34456	gi|347993079	DNA topoisomerase I	97.9	663.2	7	13.8		9.97	Cytoplasmic		Yes
153	EGY33043	gi|347991580	lysophospholipase	41.1	656.3	8	30.6		9.97	Cytoplasmic		No
154	EGY35306	gi|347993987	6-phosphogluconate dehydrogenase, decarboxylating	55.9	656.1	8	28.2		8.86	Cytoplasmic		No
155	EGY33580	gi|347992164	excinuclease ABC subunit A	14.8	655.3	7	53.7	Yes		Unknown		Yes
156	EGY34324	gi|347992947	translation initiation factor IF-2	90.6	655.2	10	19.4		9.97	Cytoplasmic		Yes
160	EGY33834	gi|347992431	Flp pilus assembly protein	32.2	644.3	9	38.5		10	CytoplasmicMembrane		Yes
161	EGY32319	gi|347990781	hemoglobin binding protein A	116.5	634.0	11	14.5		10	OuterMembrane		Yes
162	EGY33899	gi|347992502	ATP-dependent chaperone ClpB	67.5	628.8	11	23.5	Yes	9.97	Cytoplasmic		Yes
163	EGY34454	gi|347993077	UspA protein	34.6	623.7	8	41.9		9.97	Cytoplasmic		Yes
165	EGY32634	gi|347991135	YfbU family protein	19.4	611.8	11	73.2			Unknown		Yes
169	EGY34613	gi|347993239	large conductance mechanosensitive channel	14.5	578.6	8	46.6		10	CytoplasmicMembrane		Yes
170	EGY34273	gi|347992896	potassium efflux protein KefA	124.8	576.2	9	11.3	Yes	10	CytoplasmicMembrane		Yes
173	EGY34855	gi|347993500	putative inner membrane protein	56.9	571.7	10	23.1		10	CytoplasmicMembrane		Yes
176	EGY34447	gi|347993070	chromosome partition protein MukB	171.3	568.0	8	8.2			Unknown	This protein may have multiple localization sites	Yes
178	EGY34994	gi|347993653	MdlB protein	68.3	560.2	8	15.5	Yes	10	CytoplasmicMembrane		Yes
179	EGY33235	gi|347991772	autonomous glycyl radical cofactor	14.3	559.4	6	60.6		9.97	Cytoplasmic		Yes
189	EGY32410	gi|347990894	pyruvate formate lyase-activating enzyme 1	21.8	537.8	6	37.6	Yes		Unknown		Yes
190	EGY34717	gi|347993349	NlpB protein	36.7	537.2	8	40.4		9.92	OuterMembrane		Yes
194	EGY32463	gi|347990947	DNA-binding protein HU	9.3	530.4	7	72.2	Yes	9.26	Cytoplasmic		Yes
199	EGY32408	gi|347990892	murein transglycosylase C	40.5	509.9	6	24.0		9.44	Periplasmic		Yes
203	EGY32843	gi|347991367	alpha-2-macroglobulin domain protein	33.6	489.4	6	28.6		9.83	Periplasmic		Yes
206	EGY35183	gi|347993854	GTP-binding protein EngA	57.2	479.6	6	16.0		9.12	Cytoplasmic	This protein may have multiple localization sites	Yes
208	EGY33301	gi|347991852	nicotinamide-nucleotide adenylyltransferase	49.6	469.1	6	22.0		8.96	Cytoplasmic		Yes
211	EGY33518	gi|347992093	putative phosphate transport regulator	26.4	459.0	6	43.4		8.96	Cytoplasmic		Yes
213	EGY32686	gi|347991193	murein transglycosylase A	40.6	455.9	7	31.7		9.93	OuterMembrane		Yes
214	EGY32413	gi|347990897	hypothetical protein	48.3	453.6	7	21.1	Yes	9.97	Cytoplasmic		Yes
215	EGY34585	gi|347993208	H-NS histone family	15.1	452.0	6	40.2		9.97	Cytoplasmic		Yes
216	EGY33833	gi|347992430	MaoC protein	34.3	451.8	4	19.7		10	CytoplasmicMembrane		Yes
217	EGY34368	gi|347992991	NfnB protein	20.3	441.0	7	56.5			Unknown		Yes
218	EGY33984	gi|347992592	GTP-binding protein YchF	39.8	428.2	6	28.9		8.96	Cytoplasmic		Yes
219	EGY34256	gi|347992879	TonB-dependent receptor	90.5	416.2	7	13.2		9.49	OuterMembrane		Yes
220	EGY33116	gi|347991653	chromosomal replication initiation protein	56.1	415.9	6	18.8		9.52	OuterMembrane		Yes
221	EGY33836	gi|347992433	tight adherence protein E	24.2	411.9	6	26.4	Yes		Unknown		Yes
225	EGY33266	gi|347991803	trigger factor	48.3	408.1	6	18.5	Yes	8.96	Cytoplasmic		Yes
227	EGY33900	gi|347992503	ATP-dependent chaperone ClpB	27.6	399.4	4	28.8		9.97	Cytoplasmic		Yes
230	EGY34750	gi|347993382	exodeoxyribonuclease VII large subunit	24.1	391.2	5	36.4		9.97	Cytoplasmic		Yes
232	EGY34181	gi|347992804	lipoprotein, putative	23.1	385.8	8	29.4			Unknown		Yes
238	EGY34287	gi|347992910	DNA topoisomerase IV subunit A	83.6	376.9	5	14.8		9.12	Cytoplasmic	This protein may have multiple localization sites	Yes
240	EGY32700	gi|347991207	thioredoxin	7.6	376.3	5	88.7		9.26	Cytoplasmic		Yes
241	EGY33029	gi|347991566	pyrimidine regulatory protein PyrR	40.0	374.6	5	26.5		9.8	Periplasmic		Yes
243	EGY35373	gi|347994054	RlpB protein	18.9	374.0	6	36.5		9.92	OuterMembrane		Yes
245	EGY33508	gi|347992083	hypothetical protein	13.5	368.8	6	31.8			Unknown		Yes
246	EGY33481	gi|347992051	inner membrane protein	23.1	368.4	4	29.9		10	CytoplasmicMembrane		Yes
248	EGY33830	gi|347992427	rough colony protein B	18.7	354.5	4	26.3	Yes		Unknown		Yes
250	EGY33516	gi|347992091	SH3 domain protein	23.2	353.5	5	29.1			Unknown		Yes
251	EGY33824	gi|347992421	lipoprotein, putative	27.8	350.0	5	25.3		8.96	Cytoplasmic		Yes
252	EGY33042	gi|347991579	lysophospholipase	24.4	347.9	5	30.0		9.97	Cytoplasmic		No
253	EGY35253	gi|347993929	potassium uptake protein TrkA, putative	59.1	339.7	4	14.1		10	CytoplasmicMembrane		Yes
255	EGY35005	gi|347993664	glycerol-3-phosphate transporter	54.2	337.9	6	14.2		10	CytoplasmicMembrane		Yes
258	EGY35190	gi|347993861	ribonuclease, Rne/Rng family	55.5	336.6	5	19.3		9.97	Cytoplasmic		Yes
262	EGY33139	gi|347991676	PmbA protein	49.0	335.0	4	19.9		9.97	Cytoplasmic		Yes
264	EGY34869	gi|347993514	glycerate dehydrogenase	34.1	333.4	5	24.5		9.26	Cytoplasmic		Yes
265	EGY33385	gi|347991945	NmrA family protein	30.7	331.3	4	23.2		8.96	Cytoplasmic		Yes
267	EGY34493	gi|347993116	heat shock protein HtpX	31.6	328.2	4	21.3		10	CytoplasmicMembrane		Yes
268	EGY32447	gi|347990931	conserved ATP-binding protein	54.7	326.7	4	14.6			Unknown		Yes
270	EGY32418	gi|347990902	hypothetical protein	45.8	324.9	5	16.3		7.88	CytoplasmicMembrane		Yes
272	EGY33907	gi|347992510	excinuclease ATPase subunit	15.3	317.2	5	22.0	Yes		Unknown		Yes
275	EGY34535	gi|347993158	carbohydrate kinase FGGY	57.0	316.4	4	15.3		9.26	Cytoplasmic		Yes
278	EGY33383	gi|347991943	protein MioC	16.0	312.9	4	83.7		8.96	Cytoplasmic		Yes
281	EGY33008	gi|347991545	DNA polymerase III subunit delta'	20.0	306.7	3	39.1			Unknown		Yes
283	EGY32998	gi|347991535	transcription termination/antitermination factor NusG	20.9	302.4	4	37.7		9.97	Cytoplasmic		Yes
284	EGY32793	gi|347991311	macrolide export ATP-binding/permease protein MacB	24.6	301.3	3	30.5		7.88	CytoplasmicMembrane		Yes
285	EGY32798	gi|347991316	high-affinity Fe2+/Pb2+ permease	71.7	298.6	5	16.5		10	CytoplasmicMembrane		Yes
287	EGY35191	gi|347993862	glutaredoxin 2	24.2	296.3	3	23.3		8.96	Cytoplasmic		Yes
288	EGY33637	gi|347992221	heme acquisition system receptor	99.7	294.2	3	6.6		10	OuterMembrane		Yes
289	EGY33572	gi|347992156	glycerol-3-phosphate transporter	49.0	291.9	5	18.1		10	CytoplasmicMembrane		Yes
290	EGY33784	gi|347992381	hypothetical protein	81.5	288.1	4	11.1		9.97	Cytoplasmic		Yes
291	EGY32434	gi|347990918	universal stress protein A	15.6	286.9	3	29.1	Yes	9.26	Cytoplasmic		Yes
292	EGY34616	gi|347993242	peptidylprolyl isomerase FKBP-type	22.0	286.9	3	27.7		9.97	Cytoplasmic		Yes
293	EGY33376	gi|347991936	PspE protein	16.2	282.8	4	41.1			Unknown		Yes
295	EGY34386	gi|347993009	peptide methionine sulfoxide reductase MsrA/msrB	40.4	279.7	4	14.6			Unknown	This protein may have multiple localization sites	Yes
297	EGY34364	gi|347992987	tellurite resistance protein TehB	33.1	279.4	4	25.5		8.96	Cytoplasmic		Yes
298	EGY34266	gi|347992889	DNA gyrase A	98.9	278.1	4	9.6		9.97	Cytoplasmic		Yes
299	EGY33166	gi|347991703	hypothetical protein	23.1	277.8	4	28.4			Unknown		Yes
302	EGY33371	gi|347991931	oxyR like protein	33.4	275.3	5	26.4		9.97	Cytoplasmic		Yes
303	EGY33509	gi|347992084	L-lactate transport	56.6	275.2	4	6.4		10	CytoplasmicMembrane		Yes
305	EGY34749	gi|347993381	exodeoxyribonuclease VII large subunit	15.9	272.0	3	40.3			Unknown		Yes
306	EGY35201	gi|347993872	chaperone protein DnaJ	41.3	272.0	5	21.1		9.97	Cytoplasmic		Yes
307	EGY32470	gi|347990954	putative tubulin binding protein	140.9	267.9	3	3.8		9.49	OuterMembrane		Yes
309	EGY34490	gi|347993113	integration host factor, alpha subunit	11.1	263.8	4	41.8		9.97	Cytoplasmic		Yes
310	EGY32803	gi|347991321	methionine aminopeptidase, type I	29.9	263.5	4	17.7		9.97	Cytoplasmic		Yes
312	EGY33801	gi|347992398	cell division protein FtsA	45.9	262.9	4	15.3		9.97	Cytoplasmic		Yes
313	EGY34853	gi|347993498	putative transmembrane protein	68.6	262.8	3	8.5		10	CytoplasmicMembrane		Yes
315	EGY33100	gi|347991637	prolipoprotein diacylglyceryl transferase	30.3	261.0	3	19.6		10	CytoplasmicMembrane		Yes
317	EGY33202	gi|347991739	cytochrome c-type biogenesis protein CcmE	19.2	259.1	3	21.5			Unknown		Yes
318	EGY34721	gi|347993353	TypA protein	68.3	257.6	4	7.3		7.88	CytoplasmicMembrane		Yes
319	EGY35124	gi|347993789	inner membrane protein YbhI	50.7	255.2	3	9.9		10	CytoplasmicMembrane		Yes
321	EGY35262	gi|347993938	Omp1-like protein	21.4	251.4	5	30.7	Yes	10	OuterMembrane		Yes
323	EGY33033	gi|347991570	hypothetical protein	20.4	249.0	3	22.4			Unknown		Yes
326	EGY34271	gi|347992894	protein SeqA	23.2	244.6	2	24.4			Unknown		Yes
329	EGY33373	gi|347991933	shikimate 5-dehydrogenase	61.6	242.7	2	8.9		10	CytoplasmicMembrane		Yes
331	EGY33723	gi|347992314	biofilm PGA synthesis N-glycosyltransferase PgaC	47.5	237.0	3	14.4		10	CytoplasmicMembrane		Yes
332	EGY35029	gi|347993688	magnesium and cobalt transport protein CorA	36.3	237.0	3	21.0		7.88	CytoplasmicMembrane		Yes
336	EGY35260	gi|347993936	RIP metalloprotease RseP	49.1	228.3	2	12.6		10	CytoplasmicMembrane		Yes
337	EGY32688	gi|347991195	UDP-N-acetylmuramate\x3aL-alanyl-gamma-D-glutamyl-meso-diaminopimelate ligase	50.8	228.3	3	10.3		9.97	Cytoplasmic		Yes
338	EGY34398	gi|347993021	fructosamine kinase	34.0	228.3	4	15.5		8.96	Cytoplasmic		Yes
339	EGY33815	gi|347992412	transaldolase B	58.8	226.2	3	9.6		10	CytoplasmicMembrane		Yes
340	EGY33814	gi|347992411	MraZ protein	21.8	224.9	4	21.1		9.26	Cytoplasmic		Yes
343	EGY33169	gi|347991706	hypothetical protein	38.4	220.5	3	13.2			Unknown		Yes
344	EGY34046	gi|347992661	NlpD protein	57.5	219.7	3	8.6		8.96	Cytoplasmic		Yes
345	EGY33368	gi|347991928	macrophage infectivity protein	25.8	216.6	3	19.5			Unknown	This protein may have multiple localization sites	Yes
347	EGY34396	gi|347993019	S49 family peptidase	39.2	214.9	4	19.6		10	CytoplasmicMembrane		Yes
348	EGY34429	gi|347993052	putative MacA	42.1	214.4	4	13.5		9.82	CytoplasmicMembrane		Yes
350	EGY32715	gi|347991222	GTPase ObgE	43.3	210.8	2	15.9		8.96	Cytoplasmic		Yes
351	EGY34942	gi|347993593	partition protein	23.3	210.4	4	29.6			Unknown		No
354	EGY34001	gi|347992616	thiol\x3adisulfide interchange protein DsbC	25.0	201.1	4	15.9		9.76	Periplasmic		Yes
356	EGY34457	gi|347993080	LysR protein	33.7	199.8	3	12.1		9.97	Cytoplasmic		Yes
357	EGY33067	gi|347991604	peptidyl-prolyl cis-trans isomerase cyclophilin type	18.9	199.3	4	36.5	Yes	9.97	Cytoplasmic		Yes
358	EGY34384	gi|347993007	phosphoribosylformylglycinamidine synthase	17.6	198.4	2	18.8			Unknown		Yes
359	EGY32797	gi|347991315	periplasmic protein-probably involved in high-affinity Fe2+ transport	19.1	196.7	4	34.1			Unknown		Yes
361	EGY32399	gi|347990883	DnaJ domain protein	31.5	195.3	3	10.9		9.82	CytoplasmicMembrane		Yes
362	EGY33591	gi|347992175	cell envelope integrity inner membrane protein TolA	42.9	194.1	2	9.1		8.96	Cytoplasmic		Yes
364	EGY34461	gi|347993084	aromatic amino acid aminotransferase	44.1	192.8	3	9.8		9.97	Cytoplasmic		Yes
365	EGY34026	gi|347992641	periplasmic serine peptidase DegS	36.2	191.0	3	9.4		9.44	Periplasmic		Yes
368	EGY34865	gi|347993510	periplasmic oligopeptide-binding protein	58.4	188.8	2	10.0			Unknown	This protein may have multiple localization sites	Yes
371	EGY33901	gi|347992504	lipoprotein, putative	19.2	187.4	3	19.9		9.65	Extracellular		Yes
372	EGY34632	gi|347993258	C4-dicarboxylate anaerobic carrier DcuC	55.7	187.2	4	5.7		10	CytoplasmicMembrane		Yes
377	EGY34736	gi|347993368	possible DNA-binding protein	29.1	181.4	3	15.7		8.96	Cytoplasmic		No
378	EGY33260	gi|347991797	opacity-associated protein OapB	12.1	181.3	3	30.8	Yes		Unknown		Yes
383	EGY33184	gi|347991721	Na+/H+ antiporter NhaB	56.5	178.2	2	6.2		10	CytoplasmicMembrane		Yes
384	EGY35250	gi|347993926	putative HTH-type transcriptional regulator YihW	28.1	177.9	2	12.0		9.26	Cytoplasmic		Yes
390	EGY34311	gi|347992934	putative ABC transporter	14.9	176.0	3	19.5		10	CytoplasmicMembrane		Yes
392	EGY34298	gi|347992921	hypothetical protein	15.5	175.3	3	21.3		9.82	CytoplasmicMembrane		Yes
393	EGY33372	gi|347991932	AcrR protein	23.5	174.5	3	19.4		9.26	Cytoplasmic		Yes
396	EGY33787	gi|347992384	possible AAA+ superfamily ATPase	46.5	174.1	3	12.1			Unknown		Yes
398	EGY33123	gi|347991660	naphthoate synthase	21.4	172.4	3	22.3			Unknown	This protein may have multiple localization sites	Yes
400	EGY32879	gi|347991403	DNA-binding protein	17.9	170.8	2	21.9		9.26	Cytoplasmic		Yes
401	EGY34541	gi|347993164	Gst protein	24.5	170.7	3	14.6		9.97	Cytoplasmic		Yes
402	EGY33979	gi|347992587	cell division protein ZipA	41.8	169.4	2	13.0		10	CytoplasmicMembrane		Yes
403	EGY32391	gi|347990875	hypothetical protein	30.1	169.2	2	10.3		9.97	Cytoplasmic		Yes
404	EGY33175	gi|347991712	serine transporter	46.0	169.0	3	7.7		10	CytoplasmicMembrane		Yes
405	EGY34446	gi|347993069	condesin subunit E	27.6	168.6	2	14.6		9.97	Cytoplasmic		Yes
408	EGY34288	gi|347992911	DNA topoisomerase IV, B subunit	70.2	167.3	2	10.3		9.97	Cytoplasmic		Yes
409	EGY32415	gi|347990899	NADH\x3aubiquinone oxidoreductase, C subunit	28.2	166.2	3	21.8			Unknown		Yes
410	EGY34290	gi|347992913	ABC transporter domain protein	61.6	163.8	2	7.3		9.97	Cytoplasmic		Yes
411	EGY34268	gi|347992891	ferric uptake regulatory protein	16.9	163.7	3	20.5		9.97	Cytoplasmic		Yes
412	EGY32795	gi|347991313	membrane protein	48.0	163.1	2	13.4		10	CytoplasmicMembrane		Yes
413	EGY33514	gi|347992089	outer membrane lipoprotein LolB	24.5	162.8	3	13.5			Unknown		Yes
414	EGY33254	gi|347991791	helix-turn-helix containing protein	25.5	161.0	2	19.6		8.96	Cytoplasmic		Yes
415	EGY33590	gi|347992174	biopolymer transport protein	15.5	160.8	3	30.0		9.82	CytoplasmicMembrane		Yes
416	EGY34262	gi|347992885	tetratricopeptide domain protein	45.0	160.3	3	8.7		8.96	Cytoplasmic		Yes
417	EGY34733	gi|347993365	conserved ABC-type transport system protein, periplasmic component	18.4	158.7	2	17.2		9.82	CytoplasmicMembrane		Yes
418	EGY33234	gi|347991771	GTP-binding protein LepA	67.4	158.6	2	7.1		10	CytoplasmicMembrane		Yes
422	EGY34156	gi|347992779	polysaccharide pyruvyl transferase YvfF	36.9	155.5	3	11.6		8.96	Cytoplasmic		Yes
423	EGY34200	gi|347992823	secreted protein	17.8	155.2	2	28.8			Unknown		Yes
425	EGY33947	gi|347992555	protein YbjQ	11.6	153.5	2	26.2			Unknown		Yes
427	EGY34400	gi|347993023	ferredoxin--NADP reductase	29.5	152.5	2	14.7		9.97	Cytoplasmic		Yes
429	EGY34747	gi|347993379	ATPase	32.5	149.0	2	9.4		9.97	Cytoplasmic		Yes
430	EGY34203	gi|347992826	regulator of membrane protease activity	16.4	147.5	3	18.9		10	CytoplasmicMembrane		Yes
432	EGY33450	gi|347992014	protein SapB	26.0	146.4	2	17.6		10	CytoplasmicMembrane		Yes
435	EGY33803	gi|347992400	D-alanine--D-alanine ligase B	34.1	142.4	2	15.2		9.97	Cytoplasmic		Yes
436	EGY33534	gi|347992109	mce related protein	96.7	141.6	2	4.9			Unknown		Yes
437	EGY35181	gi|347993852	sugar efflux transporter	45.4	141.4	2	6.0		8.96	Cytoplasmic		Yes
439	EGY32849	gi|347991373	ascorbate-specific PTS system enzyme IIC	64.3	140.9	2	6.4		10	CytoplasmicMembrane		Yes
440	EGY34778	gi|347993414	transport associated protein 8	26.0	139.7	2	11.8		8.96	Cytoplasmic		No
441	EGY34455	gi|347993078	universal stress protein UspE	31.3	139.5	3	14.7			Unknown		Yes
442	EGY34034	gi|347992649	arginine repressor	17.2	138.4	2	23.9		9.26	Cytoplasmic		Yes
443	EGY35155	gi|347993826	apolipoprotein N-acyltransferase	58.6	137.9	2	11.6		10	CytoplasmicMembrane		Yes
445	EGY34372	gi|347992995	ribosomal large subunit pseudouridine synthase B	36.6	137.7	2	8.1		9.97	Cytoplasmic		Yes
447	EGY33141	gi|347991678	ribonuclease activity regulator protein RraA	17.9	137.1	2	27.7		9.97	Cytoplasmic		Yes
448	EGY33245	gi|347991782	formate/nitrite transporter	30.9	134.7	2	10.2		10	CytoplasmicMembrane		Yes
450	EGY33625	gi|347992209	transcriptional regulator	30.9	133.8	2	15.5			Unknown		Yes
452	EGY33716	gi|347992307	ATP-dependent RNA helicase SrmB	50.1	132.6	2	8.6		9.97	Cytoplasmic		Yes
453	EGY32643	gi|347991144	Transposition helper protein	34.1	132.3	3	13.5		8.96	Cytoplasmic		No
455	EGY34625	gi|347993251	DNA-binding transcriptional regulator AsnC	17.1	130.7	2	14.7		9.97	Cytoplasmic		Yes
456	EGY32990	gi|347991527	ATP-dependent RNA helicase SrmB	39.8	130.2	3	6.7		9.97	Cytoplasmic		Yes
459	EGY33777	gi|347992374	metallophosphoesterase	40.4	128.6	2	12.9		10	CytoplasmicMembrane		Yes
464	EGY34022	gi|347992637	ModE protein	29.3	124.5	3	12.7		9.97	Cytoplasmic		Yes
466	EGY34061	gi|347992676	peptide chain release factor 3	59.3	123.6	2	8.3		9.97	Cytoplasmic		Yes
469	EGY33257	gi|347991794	elongation factor P	18.9	123.0	2	11.0		9.97	Cytoplasmic		Yes
470	EGY33971	gi|347992579	RNA polymerase sigma factor RpoD	70.3	122.5	2	2.9		9.97	Cytoplasmic		Yes
472	EGY35166	gi|347993837	Fe-S protein assembly chaperone HscA	66.8	121.8	2	4.7		9.97	Cytoplasmic		Yes
477	EGY35002	gi|347993661	Smf protein	26.1	117.6	2	16.9		8.96	Cytoplasmic		Yes
480	EGY34987	gi|347993646	lipopolysaccharide core biosynthesis glycosyltransferase KdtX	28.9	116.2	2	8.7			Unknown		Yes
482	EGY35407	gi|347994088	formamidopyrimidine-DNA glycosylase	39.8	113.7	2	12.9		8.96	Cytoplasmic		Yes
483	EGY32440	gi|347990924	SmpA protein	15.7	113.5	2	34.3		9.92	OuterMembrane		Yes
484	EGY32488	gi|347990972	protein YhgF	85.5	113.3	2	3.8		9.97	Cytoplasmic		Yes
486	EGY33662	gi|347992246	queuine tRNA-ribosyltransferase	43.4	110.5	2	11.5		9.97	Cytoplasmic		Yes
489	EGY33813	gi|347992410	S-adenosyl-methyltransferase MraW	35.8	109.7	2	14.6		9.97	Cytoplasmic		Yes
490	EGY34612	gi|347993238	TrkA domain-containing protein	49.9	108.5	2	3.9		7.88	CytoplasmicMembrane		Yes
491	EGY33190	gi|347991727	XkdP protein	15.7	106.2	2	17.0			Unknown		Yes
493	EGY33244	gi|347991781	hit-related protein	12.9	103.6	2	22.4		9.26	Cytoplasmic		Yes
495	EGY34487	gi|347993110	DoxX family protein	15.0	102.7	2	6.5		10	CytoplasmicMembrane		Yes
497	EGY34495	gi|347993118	arabinose 5-phosphate isomerase	33.9	101.8	2	12.2		8.96	Cytoplasmic		Yes
499	EGY33537	gi|347992112	carboxy-terminal protease	78.0	101.4	2	5.3		9.82	CytoplasmicMembrane		Yes
503	EGY34380	gi|347993003	DNA-binding transcriptional regulator FruR	36.9	100.7	2	9.1		9.97	Cytoplasmic		Yes
434	EGY32694	gi|347991201	hypothetical protein	7.4	146.0	2	52.3			Unknown		Not used for prediction of KEGG pathways
462	EGY34228	gi|347992851	hypothetical protein	24.1	126.5	2	18.6			Unknown		Not used for prediction of KEGG pathways
488	EGY33698	gi|347992289	hypothetical protein	29.9	110.0	2	9.3			Unknown		Not used for prediction of KEGG pathways
494	EGY35221	gi|347993892	hypothetical protein	6.3	102.9	2	62.7			Unknown		Not used for prediction of KEGG pathways
References
1. Yu NY, Wagner JR, Laird MR, Melli G, Rey S, Lo R, et al. PSORTb 3.0: improved protein subcellular localization prediction with refined localization subcategories and predictive capabilities for all prokaryotes. Bioinformatics. 2010; 26: 1608-1615. PMID: 20472543.
2. Xie C, Mao X, Huang J, Ding Y, Wu J, Dong S, et al. KOBAS 2.0: a web server for annotation and identification of enriched pathways and diseases. Nucleic Acids Res. 2011; 39: W316-W322. PMID: 21715386.
[truncated: 5 more columns]
