# Supplementary material for: Proteomics of Aggregatibacter actinomycetemcomitans Outer Membrane Vesicles
Source: PLoS One. 2015 Sep 18;10(9):e0138591. doi: 10.1371/journal.pone.0138591 (PMC4575117; doi:10.1371/journal.pone.0138591)
Supplement: S2 Table — A total of 151 proteins were identified. (XLSX) [file pone.0138591.s003.xlsx]

## Sheet: New Sheet
S2 Table. Proteins identified by LC-MS/MS in at least three of the four independent OMV preparations of A. actinomycetemcomitans strain 173.
Proteomics	Proteomics	Proteomics	Proteomics	Proteomics	Proteomics	Proteomics	Proteomics	Localization prediction	Localization prediction	Localization prediction	COG	COG classification	KEGG	KOBAS 2 KEGG	KOBAS 2 KEGG	Metabolism	Metabolism	Metabolism	Metabolism; overview	Metabolism; overview	Metabolism; Amino acid metabolism	Metabolism; Amino acid metabolism	Metabolism; Amino acid metabolism	Metabolism; Metabolism of other amino acids	Metabolism; Metabolism of other amino acids	Metabolism; Nucleotide metabolism	Metabolism; Nucleotide metabolism	Metabolism; Carbohydrate metabolism	Metabolism; Carbohydrate metabolism	Metabolism; Carbohydrate metabolism	Metabolism; Carbohydrate metabolism	Metabolism; Carbohydrate metabolism	Metabolism; Carbohydrate metabolism	Metabolism; Carbohydrate metabolism	Metabolism; Carbohydrate metabolism	Metabolism; Energy metabolism	Metabolism; Energy metabolism	Metabolism; Lipid metabolism	Metabolism; Lipid metabolism	Metabolism; Glycan biosynthesis and metabolism	Metabolism; Metabolism of cofactors and vitamins	Metabolism; Metabolism of cofactors and vitamins	Metabolism; Metabolism of cofactors and vitamins	Genetic information processing; Translation	Genetic information processing; Translation	Genetic Information Processing; Folding, sorting and degradation	Genetic information processing; Folding, sorting and degradation	Genetic information processing; Folding, sorting and degradation	Genetic information processing; Replication and repair
Row	Accession	gi number (NCBInr)	Protein description	MW [kDa]	Mascot Score	Peptides matched	Sequence coverage [%]	PSORT 3b localization score	Predicted localization PSORT 3b)	Note				D7S homolog for KEGG annotation (482 proteins)	Any KEGG annotation (244 proteins)	KEGG metabolism (110 proteins)	KEGG biosynthesis of secondary metabolites (52 proteins)	KEGG microbial metabolism in diverse envrionments (36 proteins)	KEGG carbon metabolism (29 proteins)	KEGG biosynthesis of amino acids (20 proteins)	KEGG Alanine, aspartate and glutamate metabolism (6 proteins)	KEGG Glycine, serine and threonine metabolism (6 proteins)	KEGG Cysteine and methionine metabolism (4 proteins)	KEGG glutathione metabolism (4 proteins)	KEGG selenocompound metabolism (4 proteins)	KEGG purine metabolism (17 proteins)	KEGG pyrimidine metabolism (14 proteins)	KEGG glycolysis (17 proteins)	KEGG amino sugar and nucleotide metabolism (17 proteins)	KEGG pyruvate metabolism (15 proteins)	KEGG fructose and mannose metabolism (11 proteins)	KEGG propanoate metabolism (8 proteins)	KEGG TCA cycle (8 proteins)	KEGG pentose phosphate pathway (6 proteins)	KEGG butanoate metabolism (4 proteins)	KEGG Oxidative phosphorylation (9 proteins)	KEGG methane metabolism (8 proteins)	KEGG glycero-phospholipid metabolism (8 proteins)	KEGG fatty acid biosynthesis (6 proteins)	KEGG lipopolysaccharide biosynthesis (7 proteins)	KEGG porphyrin and chlorophyll metabolism (4 proteins)	KEGG nicotinate and nicotinamide metabolism (4 proteins)	KEGG thiamine metabolism (2 proteins)	KEGG Ribosomes (36 proteins)	KEGG Aminoacyl t-RNA biosynthesis (13 proteins)	KEGG Protein export (11 proteins)	KEGG RNA degradation (10 proteins)	KEGG sulfur relay system (1 protein)	KEGG homologous recombination (4 proteins)
												J (translation including ribosome structure and biogenesis) (22 proteins)
13	EGY34259	gi|347992882	ribosomal protein S1	59.4	2860.1	33	60.0	9.97	Cytoplasmic		COG0539	J (Ribosomal protein S1)	Genetic information processing, translation	Yes	Yes																													Yes
69	EGY34638	gi|347993264	ribosomal protein L2	29.9	1193.4	18	58.6	9.97	Cytoplasmic		COG0090	J (Ribosomal protein L2)	Genetic information processing, translation	Yes	Yes																													Yes
80	EGY34659	gi|347993285	ribosomal protein S4	23.5	1113.7	15	58.7	9.97	Cytoplasmic		COG0522	J (Ribosomal protein S4 or related protein)	Genetic information processing, translation	Yes	Yes																													Yes
89	EGY34641	gi|347993267	ribosomal protein S3	25.9	1063.3	16	64.7	9.97	Cytoplasmic		COG0092	J (Ribosomal protein S3)	Genetic information processing, translation	Yes	Yes																													Yes
143	EGY32996	gi|347991533	ribosomal protein L1	24.1	684.5	8	46.3	9.97	Cytoplasmic		COG0081	J (Ribosomal protein L1)	Genetic information processing, translation	Yes	Yes																													Yes
144	EGY34647	gi|347993273	50S ribosomal protein L5	20.3	684.2	11	54.2	9.97	Cytoplasmic		COG0094	J (Ribosomal protein L5)	Genetic information processing, translation	Yes	Yes																													Yes
151	EGY34636	gi|347993262	ribosomal protein L4/L1 family	22.0	660.7	8	50.0	9.97	Cytoplasmic		COG0088	J (Ribosomal protein L4)	Genetic information processing, translation	Yes	Yes																													Yes
180	EGY34635	gi|347993261	ribosomal protein L3	22.3	558.8	7	44.7	9.97	Cytoplasmic		COG0087	J (Ribosomal protein L3)	Genetic information processing, translation	Yes	Yes																													Yes
181	EGY34650	gi|347993276	50S ribosomal protein L6	19.0	557.9	9	62.7	9.26	Cytoplasmic		COG0097	J (Ribosomal protein L6P/L9E)	Genetic information processing, translation	Yes	Yes																													Yes
184	EGY34652	gi|347993278	30S ribosomal protein S5	17.4	549.3	7	50.0	9.26	Cytoplasmic		COG0098	J (Ribosomal protein S5)	Genetic information processing, translation	Yes	Yes																													Yes
193	EGY35012	gi|347993671	50S ribosomal protein L19	13.2	530.8	8	67.2	9.97	Cytoplasmic		COG0335	J (Ribosomal protein L19)	Genetic information processing, translation	Yes	Yes																													Yes
212	EGY34997	gi|347993656	ribosomal protein S6	14.5	458.1	5	50.4	9.97	Cytoplasmic		COG0360	J (Ribosomal protein S6)	Genetic information processing, translation	Yes	Yes																													Yes
222	EGY34658	gi|347993284	30S ribosomal protein S11	13.9	411.7	6	48.8	9.26	Cytoplasmic		COG0100	J (Ribosomal protein S11)	Genetic information processing, translation	Yes	Yes																													Yes
254	EGY34654	gi|347993280	ribosomal protein L15	15.2	338.5	5	38.2	9.97	Cytoplasmic		COG0200	J (Ribosomal protein L15)	Genetic information processing, translation	Yes	Yes																													Yes
257	EGY32719	gi|347991226	ribosomal protein L21	11.3	336.9	6	42.7	9.97	Cytoplasmic		COG0261	J (Ribosomal protein L21)	Genetic information processing, translation	Yes	Yes																													Yes
308	EGY34559	gi|347993182	30S ribosomal protein S9	14.7	264.7	4	26.2	9.97	Cytoplasmic		COG0103	J (Ribosomal protein S9)	Genetic information processing, translation	Yes	Yes																													Yes
75	EGY34399	gi|347993022	threonyl-tRNA synthetase	73.9	1167.0	18	31.1	10	Cytoplasmic		COG0441	J (Threonyl-tRNA synthetase)	Genetic information processing, translation	Yes	Yes																														Yes
98	EGY34538	gi|347993161	asparaginyl-tRNA synthetase	52.7	969.7	14	36.0	10	Cytoplasmic		COG0017	J (Aspartyl/asparaginyl-tRNA synthetase)	Genetic information processing, translation	Yes	Yes																														Yes
19	EGY32702	gi|347991209	ribonuclease E	108.8	2627.9	34	56.1	9.97	Cytoplasmic		COG1530	J (Ribonuclease G or E)	Genetic information processing, folding, sorting and degradation	Yes	Yes																																Yes
100	EGY33135	gi|347991672	polynucleotide phosphorylase/polyadenylase	81.9	952.3	13	24.3	9.97	Cytoplasmic		COG1185	J (Polyribonucleotide nucleotidyltransferase)	Nucleotide metabolism	Yes	Yes											Yes	Yes																				Yes
24	EGY35234	gi|347993910	elongation factor G	77.3	2476.5	29	65.6	9.97	Cytoplasmic		COG0480	J (Translation elongation factor EF-G, a GTPase)	No KEGG annotation using the genome of A. actionmycetemcomitans D7S as template	Yes
87	EGY32631	gi|347991132	heat shock protein HslVU, ATPase subunit HslU	49.5	1080.8	15	45.1	9.97	Cytoplasmic		COG0324, COG1220	J (tRNA delta(2)-isopentenylpyrophosphate transferase MiaA), O (ATP-dependent protease HslVU (ClpYQ), ATPase subunit)	No KEGG annotation using the genome of A. actionmycetemcomitans D7S as template	Yes
												M (Cell envelope biogenesis, outer membrane) (17 proteins)
38	EGY35394	gi|347994075	penicillin-binding protein 1A	93.9	1785.1	23	39.0	9.82	CytoplasmicMembrane		COG5009	M (Membrane carboxypeptidase/penicillin-binding protein)	Other metabolic functions	Yes	Yes	Yes
59	EGY32461	gi|347990945	D-fructose-6-phosphate amidotransferase	67.0	1383.8	20	48.9	9.97	Cytoplasmic		COG0121, COG0794, COG0449	R (Predicted glutamine amidotransferase), M (Predicted sugar phosphate isomerase involved in capsule formation), M (Glucosamine 6-phosphate synthetase)	Biosynthesis and metabolism of amino acids	Yes	Yes	Yes	Yes				Yes								Yes
4	EGY35261	gi|347993937	outer membrane protein assembly complex, YaeT protein	88.3	3849.6	44	66.7	10	OuterMembrane		COG4775	M (Outer membrane protein assembly factor BamA)	No KEGG annotation using the genome of A. actionmycetemcomitans D7S as template	Yes
11	EGY32758	gi|347991272	OmpA-like outer membrane protein	36.9	3011.6	33	77.7	10	OuterMembrane		COG3637, COG2885	M (Opacity protein and related surface antigens), M (Outer membrane protein OmpA and related peptidoglycan-associated (lipo)proteins)	No KEGG annotation using the genome of A. actionmycetemcomitans D7S as template	Yes
71	EGY33703	gi|347992294	outer membrane protein 18/16	20.3	1191.8	16	51.9	9.52	OuterMembrane		COG3637	M (Opacity protein and related surface antigens)	No KEGG annotation using the genome of A. actionmycetemcomitans D7S as template	Yes
20	EGY35196	gi|347993867	outer membrane protein 39	39.0	2612.2	31	75.1	10	OuterMembrane		COG3203	M (Outer membrane protein (porin))	No KEGG annotation using the genome of A. actionmycetemcomitans D7S as template	Yes
28	EGY34295	gi|347992918	outer membrane protein A	38.2	2010.4	24	66.6	10	OuterMembrane		COG3637, COG2885	M (Opacity protein and related surface antigens), M (Outer membrane protein OmpA and related peptidoglycan-associated (lipo)proteins)	No KEGG annotation using the genome of A. actionmycetemcomitans D7S as template	Yes
57	EGY34427	gi|347993050	putative TdeA (similar to TolC, toxin and drug export)	51.1	1396.9	19	50.3	9.95	OuterMembrane		COG1538	M (Outer membrane protein TolC)	No KEGG annotation using the genome of A. actionmycetemcomitans D7S as template	Yes
124	EGY34986	gi|347993645	outer membrane antigenic lipoprotein B	41.0	773.0	10	34.7	8.86	OuterMembrane		COG0739	M (Membrane proteins related to metalloendopeptidases)	No KEGG annotation using the genome of A. actionmycetemcomitans D7S as template	Yes
140	EGY32633	gi|347991134	lipoprotein VacJ	28.6	702.4	9	58.1	9.92	OuterMembrane		COG2853	M (Surface lipoprotein VacJ)	No KEGG annotation using the genome of A. actionmycetemcomitans D7S as template	Yes
103	EGY35206	gi|347993877	outer membrane lipoprotein pcp	15.0	936.1	11	66.2	9.92	OuterMembrane		COG3133	M (Outer membrane lipoprotein SlyB)	No KEGG annotation using the genome of A. actionmycetemcomitans D7S as template	Yes
104	EGY33593	gi|347992177	peptidoglycan-associated lipoprotein	16.7	934.6	8	56.8	10	OuterMembrane		COG2885	M (Outer membrane protein OmpA and related peptidoglycan-associated (lipo)proteins)	No KEGG annotation using the genome of A. actionmycetemcomitans D7S as template	Yes
32	EGY33479	gi|347992049	organic solvent tolerance protein	93.6	1927.2	25	40.9	10	OuterMembrane		COG1452	M (Organic solvent tolerance protein OstA)	No KEGG annotation using the genome of A. actionmycetemcomitans D7S as template	Yes
321	EGY35262	gi|347993938	Omp1-like protein	21.4	251.4	5	30.7	10	OuterMembrane		COG2825	M (Outer membrane protein HlpA)	No KEGG annotation using the genome of A. actionmycetemcomitans D7S as template	Yes
122	EGY35417	gi|347994098	AcrA protein	43.0	777.2	10	33.9	9.82	CytoplasmicMembrane		COG0845	M (Membrane-fusion protein)	No KEGG annotation using the genome of A. actionmycetemcomitans D7S as template	Yes
170	EGY34273	gi|347992896	potassium efflux protein KefA	124.8	576.2	9	11.3	10	CytoplasmicMembrane		COG3264	M (Small-conductance mechanosensitive channel)	No KEGG annotation using the genome of A. actionmycetemcomitans D7S as template	Yes
189	EGY32410	gi|347990894	pyruvate formate lyase-activating enzyme 1	21.8	537.8	6	37.6		Unknown		COG3056	M (Uncharacterized lipoprotein)	No KEGG annotation using the genome of A. actionmycetemcomitans D7S as template	Yes
139	EGY35021	gi|347993680	lipoprotein	29.7	714.2	8	44.7	9.93	OuterMembrane		COG4105	M (Outer membrane protein assembly factor BamD, BamD/ComL family)	No KEGG annotation using the genome of A. actionmycetemcomitans D7S as template	Yes
			Carbon and carbohydrate metabolism									G (carbohydrate metabolism and transport) (17 proteins)	Carbon and carbohydrate metabolism
2	EGY34365	gi|347992988	pyruvate dehydrogenase subunit E1	99.0	4204.9	52	63.7	9.97	Cytoplasmic		COG3959, COG2609	G (Transketolase, N-terminal subunit), C (Pyruvate dehydrogenase complex, dehydrogenase (E1) component)	Carbon and carbohydrate metabolism	Yes	Yes	Yes	Yes	Yes	Yes									Yes		Yes			Yes		Yes
17	EGY34754	gi|347993386	glyceraldehyde-3-phosphate dehydrogenase, type I	35.6	2659.2	33	62.9	9.97	Cytoplasmic		COG0057	G (Glyceraldehyde-3-phosphate dehydrogenase/erythrose-4-phosphate dehydrogenase GapA)	Carbon and carbohydrate metabolism	Yes	Yes	Yes	Yes	Yes		Yes								Yes
41	EGY32987	gi|347991524	phosphoglycerate kinase	41.0	1730.0	23	69.5	9.97	Cytoplasmic		COG0126	G (3-phosphoglycerate kinase Pgk)	Carbon and carbohydrate metabolism	Yes	Yes	Yes	Yes	Yes	Yes	Yes								Yes
42	EGY35094	gi|347993756	transketolase	72.7	1727.7	20	45.0	9.26	Cytoplasmic		COG3959, COG0021	G (Transketolase, N-terminal subunit), G (Transketolase TktA)	Carbon and carbohydrate metabolism	Yes	Yes	Yes	Yes	Yes	Yes	Yes														Yes
45	EGY32637	gi|347991138	phosphoglucomutase/phosphomannomutase	59.4	1695.7	23	65.2	9.26	Cytoplasmic		COG1109	G (Phosphomannomutase ManB)	Carbon and carbohydrate metabolism	Yes	Yes	Yes	Yes												Yes		Yes
46	EGY33618	gi|347992202	MtlA protein	66.6	1631.4	20	38.8	10	CytoplasmicMembrane		COG4668, COG1299, COG2213	G (Mannitol/fructose-specific phosphotransferase system, IIA domain MtlA) G (Phosphotransferase system, fructose-specific IIC component FruA) G (Phosphotransferase system, mannitol-specific IIBC component MtlA)	Carbon and carbohydrate metabolism	Yes	Yes																Yes
93	EGY33405	gi|347991965	mannose-specific PTS system protein IID	30.2	998.3	12	37.4	10	CytoplasmicMembrane		COG3716	G (Phosphotransferase system, mannose/fructose/N-acetylgalactosamine-specific component IID ManZ)	Carbon and carbohydrate metabolism	Yes	Yes	Yes													Yes		Yes
56	EGY33407	gi|347991967	PTS system mannose-specific EIIAB component	36.1	1417.6	19	70.2	9.97	Cytoplasmic		COG3444, COG2893	G (Phosphotransferase system, mannose/fructose/N-acetylgalactosamine-specific component IIB), G (Phosphotransferase system, mannose/fructose-specific component IIA)	Carbon and carbohydrate metabolism	Yes	Yes	Yes													Yes		Yes
90	EGY34527	gi|347993150	pyruvate kinase	50.0	1049.5	14	44.0	9.97	Cytoplasmic		COG0469	G (Pyruvate kinase)	Carbon and carbohydrate metabolism	Yes	Yes	Yes	Yes	Yes	Yes	Yes						Yes		Yes		Yes
158	EGY33240	gi|347991777	6-phosphofructokinase	35.2	651.2	9	41.7	9.97	Cytoplasmic		COG0205	G (6-phosphofructokinase)	Carbon and carbohydrate metabolism	Yes	Yes	Yes	Yes	Yes	Yes	Yes								Yes			Yes			Yes			Yes
200	EGY33107	gi|347991644	triose-phosphate isomerase	27.7	505.2	6	40.3	9.26	Cytoplasmic		COG0149	G (Triosephosphate isomerase TpiA)	Carbon and carbohydrate metabolism	Yes	Yes	Yes	Yes	Yes	Yes	Yes								Yes			Yes
207	EGY33007	gi|347991544	multiphosphoryl transfer protein	53.2	474.7	5	19.4	9.26	Cytoplasmic		COG4668, COG1925, COG1925	G (annitol/fructose-specific phosphotransferase system, IIA domain), G (Phosphotransferase system, HPr-related proteins FruB), G (Phosphotransferase system, HPr-related proteins FruB)	Carbon and carbohydrate metabolism	Yes	Yes	Yes															Yes
234	EGY34862	gi|347993507	glucose-specific PTS system component	17.9	384.7	5	53.0	9.97	Cytoplasmic		COG2190	G (Phosphotransferase system IIA components NagE)	Carbon and carbohydrate metabolism	Yes	Yes													Yes	Yes
102	EGY34861	gi|347993506	phosphoenolpyruvate-protein phosphotransferase	63.5	947.4	13	37.0	9.97	Cytoplasmic		COG3848, COG3836, COG1080	T (Phosphohistidine swiveling domain), G (2,4-dihydroxyhept-2-ene-1,7-dioic acid aldolase HpcH), G (Phosphoenolpyruvate-protein kinase PtsA)	Environmental information processing, membrane transport	Yes	Yes
44	EGY33529	gi|347992104	spermidine/putrescine-binding periplasmic protein 1 precursor	43.7	1706.7	21	71.0	9.44	Periplasmic		COG0687, COG1653	E (Spermidine/putrescine-binding periplasmic protein PotD) G (ABC-type sugar transport system, periplasmic component UgpB)	Environmental information processing, membrane transport	Yes	Yes
79	EGY35095	gi|347993757	transaldolase	35.1	1135.5	16	67.2	8.86	Cytoplasmic		COG0176	G (Transaldolase MipB)	Biosynthesis and metabolism of amino acids	Yes	Yes	Yes	Yes	Yes	Yes	Yes														Yes
15	EGY33724	gi|347992315	biofilm PGA synthesis lipoprotein PgaB	72.9	2785.2	34	72.5		Unknown		COG0726	G (Predicted xylanase/chitin deacetylase)	No KEGG annotation using the genome of A. actionmycetemcomitans D7S as template	No
												O (Posttranslational modification, protein turnover, chaperones) (15 proteins)
21	EGY33970	gi|347992578	ATP-dependent protease La	89.9	2582.2	34	56.1	9.97	Cytoplasmic		COG2802, COG0466	R (Uncharacterized protein, similar to the N-terminal domain of Lon protease), O (ATP-dependent Lon protease, bacterial type)	No KEGG annotation using the genome of A. actionmycetemcomitans D7S as template	Yes
27	EGY34202	gi|347992825	HflC protein	34.2	2169.8	25	74.0	8.96	Cytoplasmic		COG0330	O (Membrane protease subunits, stomatin/prohibitin homologs HflC)	No KEGG annotation using the genome of A. actionmycetemcomitans D7S as template	Yes
51	EGY33160	gi|347991697	SurA protein	68.0	1522.6	19	52.2	9.82	CytoplasmicMembrane		COG0760, COG0760	O, O (Parvulin-like peptidyl-prolyl isomerase SurA)	No KEGG annotation using the genome of A. actionmycetemcomitans D7S as template	Yes
62	EGY34296	gi|347992919	protease DegQ	48.8	1295.9	15	50.4	9.76	Periplasmic		COG3591, COG0265, COG0750	E (V8-like Glu-specific endopeptidase) O (Trypsin-like serine proteases, typically periplasmic, contain C-terminal PDZ domain DegQ), M (Predicted membrane-associated Zn-dependent proteases 1)	No KEGG annotation using the genome of A. actionmycetemcomitans D7S as template	Yes
39	EGY35122	gi|347993787	DsbB family disulfide bond formation protein	56.4	1751.0	22	54.7	10	CytoplasmicMembrane		COG1495	O (Disulfide bond formation protein DsbB)	No KEGG annotation using the genome of A. actionmycetemcomitans D7S as template	Yes
12	EGY35202	gi|347993873	heat shock protein 70	68.4	2928.9	37	69.1	9.97	Cytoplasmic		COG0443	O (Molecular chaperone DnaK)	Genetic information processing, folding, sorting and degradation	Yes	Yes																																Yes
14	EGY32379	gi|347990863	chaperonin GroEL	57.4	2368.3	31	69.8	9.97	Cytoplasmic		COG0459	O (Chaperonin GroEL (HSP60 family))	Genetic information processing, folding, sorting and degradation	Yes	Yes																																Yes
64	EGY34369	gi|347992992	signal peptide peptidase SppA, 67K type	69.6	1261.0	16	38.4	9.82	CytoplasmicMembrane		COG0740, COG0616, COG0616	O (Protease subunit of ATP-dependent Clp proteases), O (Periplasmic serine proteases (ClpP class) SppA), O (Periplasmic serine proteases (ClpP class) SppA)	No KEGG annotation using the genome of A. actionmycetemcomitans D7S as template	Yes
67	EGY34706	gi|347993338	HflK protein	46.6	1221.5	16	56.8	8.96	Cytoplasmic		COG0330	O (Membrane protease subunits, stomatin/prohibitin homologs HflC)	No KEGG annotation using the genome of A. actionmycetemcomitans D7S as template	Yes
73	EGY34705	gi|347993337	HflC protein	33.0	1185.1	13	56.9	8.96	Cytoplasmic		COG0330	O (Membrane protease subunits, stomatin/prohibitin homologs HflC)	No KEGG annotation using the genome of A. actionmycetemcomitans D7S as template	Yes
92	EGY33370	gi|347991930	peroxiredoxin like protein	26.9	1006.7	14	64.5	8.86	Cytoplasmic		COG0678, COG0695, COG0450	O (Peroxiredoxin AHP1), O (Glutaredoxin and related proteins GrxC), O (Peroxiredoxin AhpC)	No KEGG annotation using the genome of A. actionmycetemcomitans D7S as template	Yes
120	EGY33797	gi|347992394	heat shock protein 90	71.0	827.1	10	24.6	9.97	Cytoplasmic		COG0326	O (Molecular chaperone, HSP90 family HtpG)	No KEGG annotation using the genome of A. actionmycetemcomitans D7S as template	Yes
121	EGY32754	gi|347991268	thioredoxin peroxidase	17.5	812.2	7	91.6	9.44	Periplasmic		COG2077, COG0450	O (Peroxiredoxin Tpx), O (Peroxiredoxin AhpC)	No KEGG annotation using the genome of A. actionmycetemcomitans D7S as template	Yes
225	EGY33266	gi|347991803	trigger factor	48.3	408.1	6	18.5	8.96	Cytoplasmic		COG0544	O (FKBP-type peptidyl-prolyl cis-trans isomerase (trigger factor) Tig)	No KEGG annotation using the genome of A. actionmycetemcomitans D7S as template	Yes
357	EGY33067	gi|347991604	peptidyl-prolyl cis-trans isomerase cyclophilin type	18.9	199.3	4	36.5	9.97	Cytoplasmic		COG0652	O (Peptidyl-prolyl cis-trans isomerase (rotamase) - cyclophilin family, PpiB)	No KEGG annotation using the genome of A. actionmycetemcomitans D7S as template	Yes
												C (energy production and conversion) (14 proteins)
23	EGY34366	gi|347992989	dihydrolipoamide acetyltransferase component of pyruvate dehydrogenase complex	55.6	2501.2	34	49.9	9.97	Cytoplasmic		COG0509, COG0508, COG0511	E (Glycine cleavage system H protein) C (Pyruvate/2-oxoglutarate dehydrogenase complex, dihydrolipoamide acyltransferase (E2) component, and related enzymes AceF) I (Biotin carboxyl carrier protein)	Carbon and carbohydrate metabolism	Yes	Yes	Yes	Yes	Yes	Yes									Yes		Yes			Yes
26	EGY34357	gi|347992980	phosphate acetyltransferase	76.8	2204.3	28	58.1	9.97	Cytoplasmic		COG0280, COG0132, COG0857	C (Phosphotransacetylase Pta) H (Dethiobiotin synthetase BioD) R (BioD-like N-terminal domain of phosphotransacetylase Pta)	Carbon and carbohydrate metabolism	Yes	Yes	Yes		Yes	Yes											Yes		Yes					Yes
33	EGY34367	gi|347992990	dihydrolipoyl dehydrogenase	50.7	1845.6	23	54.0	9.97	Cytoplasmic		COG1635, COG1249	G (Ribulose 1,5-bisphosphate synthetase, converts PRPP to RuBP, flavoprotein THI4) C (Pyruvate/2-oxoglutarate dehydrogenase complex, dihydrolipoamide dehydrogenase (E3) component, and related enzymes Lpd)	Carbon and carbohydrate metabolism	Yes	Yes	Yes	Yes	Yes	Yes			Yes						Yes		Yes			Yes
37	EGY34358	gi|347992981	acetate kinase	43.8	1795.3	22	72.0	9.97	Cytoplasmic		COG0282	C (Acetate kinase ackA)	Carbon and carbohydrate metabolism	Yes	Yes	Yes		Yes	Yes											Yes		Yes					Yes
70	EGY32468	gi|347990952	phosphoenolpyruvate carboxykinase	59.1	1192.2	15	43.9	9.97	Cytoplasmic		COG1866	C (Phosphoenolpyruvate carboxykinase (ATP) PckA)	Carbon and carbohydrate metabolism	Yes	Yes	Yes	Yes	Yes										Yes		Yes			Yes
8	EGY33246	gi|347991783	formate acetyltransferase	86.2	3408.9	42	59.0	9.97	Cytoplasmic		COG3445, COG1882	R (Acid-induced glycyl radical enzyme) C (Pyruvate-formate lyase PflD)	Carbon and carbohydrate metabolism	Yes	Yes	Yes														Yes		Yes			Yes
35	EGY34394	gi|347993017	Ndh protein	48.8	1841.3	24	61.3	7.88	CytoplasmicMembrane		COG1252	C (NADH dehydrogenase, FAD-containing subunit Ndh)	Energy metabolism, oxidative phosphorylation	Yes	Yes																					Yes
58	EGY33393	gi|347991953	F0F1 ATP synthase subunit alpha	55.6	1389.1	19	43.3	9.97	Cytoplasmic		COG0056	C (F0F1-type ATP synthase, alpha subunit AtpA)	Energy metabolism, oxidative phosphorylation	Yes	Yes	Yes																				Yes
61	EGY33395	gi|347991955	ATP synthase F1, beta subunit	49.8	1336.9	16	58.6		Cytoplasmic	This protein may have multiple localization sites	COG0055	C (F0F1-type ATP synthase, beta subunit AtpD)	Energy metabolism, oxidative phosphorylation	Yes	Yes	Yes																				Yes
125	EGY33585	gi|347992169	cytochrome bd ubiquinol oxidase subunit I	58.4	771.6	10	24.0	10	CytoplasmicMembrane		COG1271	C (Cytochrome bd-type quinol oxidase, subunit 1)	Energy metabolism, oxidative phosphorylation	Yes	Yes	Yes																				Yes
34	EGY35003	gi|347993662	glycerophosphoryl diester phosphodiesterase	41.4	1843.0	28	73.1	8.89	Extracellular	This protein may have multiple localization sites	COG0584	C (Glycerophosphoryl diester phosphodiesterase UgpQ)	Lipid metabolism	Yes	Yes																							Yes
29	EGY34334	gi|347992957	hypothetical protein	54.4	1999.4	25	58.9	10	CytoplasmicMembrane		COG3288	C (NAD/NADP transhydrogenase alpha subunit PntA)	Nucleotide metabolism	Yes	Yes	Yes																										Yes
117	EGY34335	gi|347992958	pyridine nucleotide transhydrogenase	50.3	857.1	11	27.8	10	CytoplasmicMembrane		COG1282	C (NAD/NADP transhydrogenase beta subunit PtnB)	Metabolism of cofactors and vitamins	Yes	Yes	Yes																										Yes
214	EGY32413	gi|347990897	hypothetical protein	48.3	453.6	7	21.1	9.97	Cytoplasmic		COG1726	C (Na+-transporting NADH:ubiquinone oxidoreductase, subunit NqrA)	No KEGG annotation using the genome of A. actionmycetemcomitans D7S as template	Yes
												U (Intracellular trafficking, secretion, and vesicular transport) (11 proteins)
50	EGY33639	gi|347992223	protein-export membrane protein SecD	66.8	1531.6	18	39.3	10	CytoplasmicMembrane		COG0342	U (Preprotein translocase subunit SecD)	Genetic information processing, folding, sorting and degradation	Yes	Yes																															Yes
88	EGY35376	gi|347994057	preprotein translocase, SecA subunit	102.4	1075.3	17	27.5	9.12	Cytoplasmic	This protein may have multiple localization sites	COG0653	U (Preprotein translocase subunit SecA)	Genetic information processing, folding, sorting and degradation	Yes	Yes																															Yes
123	EGY33233	gi|347991770	LepB protein	39.1	775.7	10	36.5	10	CytoplasmicMembrane		COG0681, COG4959	U (Signal peptidase I LepB), O (Type IV secretory pathway, protease TraF)	Genetic information processing, folding, sorting and degradation	Yes	Yes																															Yes
138	EGY33228	gi|347991765	putative inner membrane protein translocase component YidC	61.4	714.3	9	22.1	10	CytoplasmicMembrane		COG0706	U (Preprotein translocase subunit YidC)	Genetic information processing, folding, sorting and degradation	Yes	Yes																															Yes
157	EGY33589	gi|347992173	protein TolQ	25.5	653.6	9	40.6	10	CytoplasmicMembrane		COG0811	U (Biopolymer transport proteins)	Other metabolic functions	Yes	Yes			Yes
10	EGY33838	gi|347992435	tight adherence protein G (74% identity to Flp pilus assembly protein TadG from D7S)	59.3	3221.0	42	53.3		Unknown		COG4961	U (Flp pilus assembly protein TadG)	No KEGG annotation using the genome of A. actionmycetemcomitans D7S as template	Yes
18	EGY33831	gi|347992428	flp operon protein D	41.6	2648.7	30	67.1	8.96	Cytoplasmic		COG4963	U (Flp pilus assembly protein, ATPase CpaE)	No KEGG annotation using the genome of A. actionmycetemcomitans D7S as template	Yes
25	EGY33592	gi|347992176	translocation protein TolB	45.5	2214.6	29	72.8	9.76	Periplasmic		COG0823	U (Periplasmic component of the Tol biopolymer transport system TolB)	No KEGG annotation using the genome of A. actionmycetemcomitans D7S as template	Yes
30	EGY33829	gi|347992426	GspD protein (type 2 secretion)	50.1	1928.9	26	64.3	10	OuterMembrane		COG4964	U (Flp pilus assembly protein, secretin CpaC)	No KEGG annotation using the genome of A. actionmycetemcomitans D7S as template	Yes
36	EGY33832	gi|347992429	tight adherence protein A	47.1	1802.8	20	67.4	9.97	Cytoplasmic		COG4962, COG2804	U (Flp pilus assembly protein, ATPase CpaF), N (Type II secretory pathway, ATPase PulE/Tfp pilus assembly pathway, ATPase PilB, PulE)	No KEGG annotation using the genome of A. actionmycetemcomitans D7S as template	Yes
40	EGY33835	gi|347992432	putative nonspecific tight adherence protein D	28.4	1743.9	22	65.2		Unknown		COG5010	U (Flp pilus assembly protein TadD, contains TPR repeats TadD)	No KEGG annotation using the genome of A. actionmycetemcomitans D7S as template	Yes
												E (amino acid metabolism and transport) (6 proteins)
43	EGY32382	gi|347990866	aspartate ammonia-lyase	51.4	1711.0	22	65.7	9.97	Cytoplasmic		COG1027	E (Aspartate ammonia-lyase AspA)	Biosynthesis and metabolism of amino acids	Yes	Yes	Yes					Yes
129	EGY33981	gi|347992589	cysteine synthase A	28.4	756.8	10	58.2	9.26	Cytoplasmic		COG0031, COG0498	E (Cysteine synthase CysK), E (Threonine synthase ThrC)	Biosynthesis and metabolism of amino acids	Yes	Yes	Yes		Yes	Yes	Yes			Yes
53	EGY33612	gi|347992196	serine hydroxymethyltransferase	45.8	1507.9	19	49.8	9.97	Cytoplasmic		COG0112, COG1982	E (Glycine/serine hydroxymethyltransferase GlyA), E (Arginine/lysine/ornithine decarboxylases)	Biosynthesis and metabolism of amino acids	Yes	Yes	Yes	Yes	Yes	Yes	Yes		Yes															Yes
77	EGY35170	gi|347993841	cysteine desulfurase IscS	45.0	1158.1	16	55.9	9.97	Cytoplasmic		COG1104	E (Cysteine sulfinate desulfinase/cysteine desulfurase and related enzymes NifS)	Genetic information processing, folding, sorting and degradation	Yes	Yes																												Yes					Yes
106	EGY35175	gi|347993846	ferric transporter ATP-binding subunit	38.7	914.4	11	47.1	10	CytoplasmicMembrane		COG3842	E (ABC-type spermidine/putrescine transport systems, ATPase components PotA)	Environmental information processing, membrane transport	Yes	Yes
174	EGY33532	gi|347992107	putrescine/spermidine ABC transporter ATPase protein	42.3	571.6	7	29.8	7.88	CytoplasmicMembrane		COG3842	E (ABC-type spermidine/putrescine transport systems, ATPase components PotA)	Environmental information processing, membrane transport	Yes	Yes
												P (inorganic ion transport and metabolism) (5 proteins)
48	EGY32664	gi|347991165	D-methionine-binding lipoprotein MetQ	30.0	1609.8	19	56.2	9.97	CytoplasmicMembrane		COG1464, COG0715	P (ABC-type metal ion transport system, periplasmic component/surface antigen NlpA), P (ABC-type nitrate/sulfonate/bicarbonate transport systems, periplasmic components TauA)	Environmental information processing, membrane transport	Yes	Yes
192	EGY34450	gi|347993073	ferritin like protein-1	18.7	532.0	7	47.2	9.97	Cytoplasmic		COG1528	P (Ferritin-like protein Ftn)	Metabolism of cofactors and vitamins	Yes	Yes																										Yes
31	EGY32827	gi|347991351	TonB-dependent siderophore receptor	78.7	1928.6	23	50.3	10	OuterMembrane		COG1629	P (Outer membrane receptor proteins, mostly Fe transport CirA)	No KEGG annotation using the genome of A. actionmycetemcomitans D7S as template	Yes
145	EGY33220	gi|347991757	copper/zinc superoxide dismutase	20.2	682.6	8	46.1	10	Periplasmic		COG2032	P (Cu/Zn superoxide dismutase SodC)	No KEGG annotation using the genome of A. actionmycetemcomitans D7S as template	Yes
16	EGY33725	gi|347992316	biofilm PGA synthesis protein PgaA precursor	91.0	2729.2	39	60.4		Unknown		COG3170, COG1629	N (Tfp pilus assembly protein FimV) P (Outer membrane receptor proteins, mostly Fe transport CirA)	No KEGG annotation using the genome of A. actionmycetemcomitans D7S as template	Yes
												L (replication, recombination and repair) (4 proteins)
91	EGY33137	gi|347991674	ATP-dependent RNA helicase	67.2	1037.1	16	37.8	9.97	Cytoplasmic		COG0513	L (Superfamily II DNA and RNA helicases SrmB)	Genetic information processing, folding, sorting and degradation	Yes	Yes																																Yes
147	EGY33223	gi|347991760	DNA polymerase III, beta subunit	41.5	668.5	9	33.3	9.97	Cytoplasmic		COG0592	L (DNA polymerase sliding clamp subunit DnaN)	Genetic information processing, replication and repair	Yes	Yes	Yes										Yes	Yes																						Yes
101	EGY33486	gi|347992056	DNA gyrase, B subunit	90.0	949.8	14	25.9	9.26	Cytoplasmic		COG0187	L (Type IIA topoisomerase GyrB)	No KEGG annotation using the genome of A. actionmycetemcomitans D7S as template	Yes
194	EGY32463	gi|347990947	DNA-binding protein HU	9.3	530.4	7	72.2	9.26	Cytoplasmic		COG0776	L (Bacterial nucleoid DNA-binding protein HimA)	No KEGG annotation using the genome of A. actionmycetemcomitans D7S as template	Yes
												K (transcription) (4 proteins)
1	EGY32992	gi|347991529	DNA-directed RNA polymerase, beta' subunit	157.9	4475.2	59	56.2	9.97	Cytoplasmic		COG0086	K (DNA-directed RNA polymerase, beta' subunit/160 kD subunit RpoC)	Nucleotide metabolism	Yes	Yes	Yes										Yes	Yes
5	EGY32993	gi|347991530	DNA-directed RNA polymerase, beta subunit	149.8	3836.8	45	48.1	9.97	Cytoplasmic		COG0085	K (DNA-directed RNA polymerase, beta subunit/140 kD subunit RpoB)	Nucleotide metabolism	Yes	Yes	Yes										Yes	Yes
82	EGY34660	gi|347993286	DNA-directed RNA polymerase, alpha subunit	36.4	1109.1	13	57.4	9.97	Cytoplasmic		COG0202	K (DNA-directed RNA polymerase, alpha subunit/40 kD subunit RpoA)	Nucleotide metabolism	Yes	Yes	Yes										Yes	Yes
114	EGY33055	gi|347991592	transcription termination factor Rho	45.9	885.8	12	38.1	9.97	Cytoplasmic		COG1158	K (Transcription termination factor Rho)	Genetic information processing, folding, sorting and degradation	Yes	Yes																																Yes
												F (nucleotide metabolism and transport) (4 proteins)
134	EGY33161	gi|347991698	uracil phosphoribosyltransferase	22.6	725.7	10	54.3	9.97	Cytoplasmic		COG0035	F (Uracil phosphoribosyltransferase Upp)	Nucleotide metabolism	Yes	Yes	Yes											Yes
142	EGY33512	gi|347992087	ribose-Phosphate pyrophosphokinase	34.3	697.3	10	49.1	9.97	Cytoplasmic		COG0634, COG0462	F (Hypoxanthine-guanine phosphoribosyltransferase Hpt), F (Phosphoribosylpyrophosphate synthetase PrsA)	Carbon and carbohydrate metabolism	Yes	Yes	Yes	Yes	Yes	Yes	Yes						Yes								Yes
66	EGY33699	gi|347992290	NAD nucleotidase	66.6	1236.6	19	43.7	9.76	Periplasmic		COG0807, COG0737	H (GTP cyclohydrolase II RibA) F (5'-nucleotidase/2',3'-cyclic phosphodiesterase and related esterases)	Nucleotide metabolism	Yes	Yes	Yes	Yes									Yes	Yes															Yes
7	EGY33510	gi|347992085	L-lactate dehydrogenase LctD	42.0	3570.8	49	86.4	9.97	Cytoplasmic		COG0167, COG1304	F (Dihydroorotate dehydrogenase PyrD) H (Isopentenyl diphosphate isomerase (BS_ypgA, MTH48 and related proteins) idi)	Carbon and carbohydrate metabolism	Yes	Yes	Yes														Yes
												H (coenzyme metabolism) (3 proteins)
60	EGY32476	gi|347990960	HemX protein	51.0	1354.1	17	49.9		Unknown		COG2959, COG4372	H (Uncharacterized enzyme of heme biosynthesis), S (Uncharacterized protein conserved in bacteria with the myosin-like domain)	Metabolism of cofactors and vitamins	Yes	Yes	Yes	Yes																								Yes
84	EGY32420	gi|347990904	thiamine biosynthesis lipoprotein ApbE	39.7	1095.2	15	53.0		Unknown		COG1477	H (Membrane-associated lipoprotein involved in thiamine biosynthesis)	No KEGG annotation using the genome of A. actionmycetemcomitans D7S as template	Yes
130	EGY32477	gi|347990961	HemY protein	46.8	739.0	10	34.2	9.97	CytoplasmicMembrane		COG3071	H (Uncharacterized enzyme of heme biosynthesis )	No KEGG annotation using the genome of A. actionmycetemcomitans D7S as template	Yes
												D (cell division and chromosome partioning) (2 proteins)
128	EGY34289	gi|347992912	putative adhesin/invasin, (99% sequence identity to gi|19911154) outer membrane protein 100 , OMP100)	32.0	761.5	12	31.2	9.93	OuterMembrane		COG1196	D (Chromosome segregation ATPases Smc)	No KEGG annotation using the genome of A. actionmycetemcomitans D7S as template	Yes
99	EGY33800	gi|347992397	cell division protein FtsZ	44.7	960.9	11	49.2		Cytoplasmic	This protein may have multiple localization sites	COG0206	D (Cell division GTPase FtsZ)	No KEGG annotation using the genome of A. actionmycetemcomitans D7S as template	Yes
												V (Defense mechanisms) (2 proteins)
68	EGY35418	gi|347994099	acriflavine resistance protein	111.2	1216.2	16	19.7	10	CytoplasmicMembrane		COG0841	V (Cation/multidrug efflux pump)	No KEGG annotation using the genome of A. actionmycetemcomitans D7S as template	Yes
178	EGY34994	gi|347993653	MdlB protein	68.3	560.2	8	15.5	10	CytoplasmicMembrane		COG1132	V (ABC-type multidrug transport system, ATPase and permease components MdlB)	No KEGG annotation using the genome of A. actionmycetemcomitans D7S as template	Yes
												Q (Secondary metabolites biosynthesis, transport, and catabolism) (2 proteins)
6	EGY33615	gi|347992199	leukotoxin	113.9	3789.3	50	53.5	10	Extracellular		COG2931	Q (RTX toxins and related Ca2+-binding proteins)	No KEGG annotation using the genome of A. actionmycetemcomitans D7S as template	Yes
118	EGY33052	gi|347991589	3-ketoacyl-acyl carrier protein reductase	25.5	855.6	9	48.3	9.26	Cytoplasmic		COG1028	Q (Dehydrogenases with different specificities FabG)	Lipid metabolism	Yes	Yes	Yes																							Yes
												I (lipid metabolism) (2 proteins)
74	EGY34726	gi|347993358	FadL protein	51.9	1169.7	15	35.8	10	OuterMembrane		COG2067	I (Long-chain fatty acid transport protein FadL)	No KEGG annotation using the genome of A. actionmycetemcomitans D7S as template	Yes
3	EGY33571	gi|347992155	outer membrane protein 64	72.0	4080.7	51	73.2	10	OuterMembrane		COG2067, COG1629	I (Long-chain fatty acid transport protein FadL), P (Outer membrane receptor proteins, mostly Fe transport CirA)	No KEGG annotation using the genome of A. actionmycetemcomitans D7S as template	Yes
												T (signal transduction) (1 protein)
291	EGY32434	gi|347990918	universal stress protein A	15.6	286.9	3	29.1	9.26	Cytoplasmic		COG0589, COG2205	T (Universal stress protein UspA and related nucleotide-binding proteins, T (Osmosensitive K+ channel histidine kinase KdpD)	No KEGG annotation using the genome of A. actionmycetemcomitans D7S as template	Yes
												R (general functional prediction only) (6 proteins)
9	EGY34391	gi|347993014	LppC family lipoprotein	63.2	3257.3	36	69.2		Unknown		COG3107	R (Putative lipoprotein)	No KEGG annotation using the genome of A. actionmycetemcomitans D7S as template	Yes
127	EGY34388	gi|347993011	OsmY protein	20.9	764.2	9	51.8	9.76	Periplasmic		COG2823	R (Predicted periplasmic or secreted lipoprotein OsmY)	No KEGG annotation using the genome of A. actionmycetemcomitans D7S as template	Yes
22	EGY32844	gi|347991368	alpha-2-macroglobulin domain protein	181.2	2533.9	34	33.6		Unknown		COG2373	R (Large extracellular alpha-helical protein)	No KEGG annotation using the genome of A. actionmycetemcomitans D7S as template	Yes
78	EGY32683	gi|347991190	P4 lipoprotein	29.8	1150.9	11	63.0		Unknown		COG2503	R (Predicted secreted acid phosphatase)	No KEGG annotation using the genome of A. actionmycetemcomitans D7S as template	Yes
162	EGY33899	gi|347992502	ATP-dependent chaperone ClpB	67.5	628.8	11	23.5	9.97	Cytoplasmic		COG0714	R (MoxR-like ATPases)	No KEGG annotation using the genome of A. actionmycetemcomitans D7S as template	Yes
												S (no functional prediction) (2 proteins)
85	EGY34615	gi|347993241	hypothetical protein	26.7	1089.1	16	73.6	9.52	OuterMembrane		COG3471	S (Predicted periplasmic/secreted protein)	No KEGG annotation using the genome of A. actionmycetemcomitans D7S as template	Yes
47	EGY35203	gi|347993874	hypothetical protein	52.9	1623.4	23	62.8	9.82	CytoplasmicMembrane		COG5339	S (Uncharacterized protein conserved in bacteria)	No KEGG annotation using the genome of A. actionmycetemcomitans D7S as template	Yes
												No annotation at all (12 proteins)
116	EGY33451	gi|347992015	lipoprotein, putative	34.1	874.6	13	50.0		Unknown				No KEGG annotation using the genome of A. actionmycetemcomitans D7S as template	Yes
49	EGY33115	gi|347991652	lipoprotein, putative	26.6	1567.1	19	67.3		Unknown				No KEGG annotation using the genome of A. actionmycetemcomitans D7S as template	Yes
76	EGY33192	gi|347991729	factor H-binding protein	28.1	1161.5	14	56.3		Unknown				No KEGG annotation using the genome of A. actionmycetemcomitans D7S as template	Yes
86	EGY33837	gi|347992434	tight adherence protein F	21.9	1087.5	11	42.7		Unknown				No KEGG annotation using the genome of A. actionmycetemcomitans D7S as template	Yes
148	EGY34442	gi|347993065	lipoprotein HlpB	21.9	667.6	9	58.9		Unknown				No KEGG annotation using the genome of A. actionmycetemcomitans D7S as template	Yes
155	EGY33580	gi|347992164	excinuclease ABC subunit A	14.8	655.3	7	53.7		Unknown				No KEGG annotation using the genome of A. actionmycetemcomitans D7S as template	Yes
221	EGY33836	gi|347992433	tight adherence protein E	24.2	411.9	6	26.4		Unknown				No KEGG annotation using the genome of A. actionmycetemcomitans D7S as template	Yes
248	EGY33830	gi|347992427	rough colony protein B	18.7	354.5	4	26.3		Unknown				No KEGG annotation using the genome of A. actionmycetemcomitans D7S as template	Yes
52	EGY35213	gi|347993884	hypothetical protein	17.0	1517.0	18	61.3		Unknown				No KEGG annotation using the genome of A. actionmycetemcomitans D7S as template	Yes
54	EGY33828	gi|347992425	flp operon protein C	30.5	1490.3	17	65.0		Unknown				No KEGG annotation using the genome of A. actionmycetemcomitans D7S as template	Yes
272	EGY33907	gi|347992510	excinuclease ATPase subunit	15.3	317.2	5	22.0		Unknown				No KEGG annotation using the genome of A. actionmycetemcomitans D7S as template	Yes
378	EGY33260	gi|347991797	opacity-associated protein OapB	12.1	181.3	3	30.8		Unknown				No KEGG annotation using the genome of A. actionmycetemcomitans D7S as template	Yes
[truncated: 7 more columns]
