# Supplementary material for: Proteomics of Aggregatibacter actinomycetemcomitans Outer Membrane Vesicles
Source: PLoS One. 2015 Sep 18;10(9):e0138591. doi: 10.1371/journal.pone.0138591 (PMC4575117; doi:10.1371/journal.pone.0138591)
Supplement: S3 Table — Where available, references are included that support virulence-related activities of the A. actinomycetemcomitans proteins and/or their paralogues in other bacterial species. (XLSX) [file pone.0138591.s004.xlsx]

## Sheet: Sheet1
S3 Table. VirulentPred screening of the 151 proteins in the A. actinomycetemcomitans strain 173 OMV proteome. Where feasible, references are included that support virulence-related activities of the A. actinomycetemcomitans proteins and/or their paralogues in other bacterial species.
Cascade of SVMs and PSI-BLAST	Genbankidentifier	Accession number	Domains	Note	Description	Prediction results	Predicted Scores	Selected literature A. actinomycetemcomitans	Selected literature other bacterial species
1	>gi|347990863	gb|EGY32379.1	GroEL, chaperonin_like	Chaperone	chaperonin GroEL [Aggregatibacter actinomycetemcomitans serotype e str. SC1083]	Virulent	0.1404	[1-5]
6	>gi|347990960	gb|EGY32476.1	HemX		HemX protein [Aggregatibacter actinomycetemcomitans serotype e str. SC1083]	Virulent	1.0523
7	>gi|347990961	gb|EGY32477.1	HemY_N, HemY		HemY protein [Aggregatibacter actinomycetemcomitans serotype e str. SC1083]	Virulent	0.0896
14	>gi|347991226	gb|EGY32719.1	Ribosomal_L21p, rpIU		ribosomal protein L21 [Aggregatibacter actinomycetemcomitans serotype e str. SC1083]	Virulent	0.1079
15	>gi|347991268	gb|EGY32754.1	Thioredoxin_like, PRX_Atyp2Cys		thioredoxin peroxidase [Aggregatibacter actinomycetemcomitans serotype e str. SC1083]	Virulent	1.0317
16	>gi|347991272	gb|EGY32758.1	OmpA, OmpA_membrane, OM_channels; OmpA_C-like		OmpA-like outer membrane protein [Aggregatibacter actinomycetemcomitans serotype e str. SC1083]	Virulent	0.8409	[6-8]	[9-11]
17	>gi|347991351	gb|EGY32827.1	OM_channels, Ferrienterobactin_receptor, TonB dependent receptor		TonB-dependent siderophore receptor [Aggregatibacter actinomycetemcomitans serotype e str. SC1083]	Virulent	0.5837		[12]
18	>gi|347991368	gb|EGY32844.1	COG2373, A2M_N, A2M_N2, isopren_C2_like		LOW QUALITY PROTEIN: alpha-2-macroglobulin domain protein [Aggregatibacter actinomycetemcomitans serotype e str. SC1083]	Virulent	1.0519
24	>gi|347991589	gb|EGY33052.1	SDR, fabG, BKR_SDR_c		3-ketoacyl-acyl carrier protein reductase [Aggregatibacter actinomycetemcomitans serotype e str. SC1083]	Virulent	0.7778
28	>gi|347991652	gb|EGY33115.1	Lipoprotein_5		lipoprotein, putative [Aggregatibacter actinomycetemcomitans serotype e str. SC1083]	Virulent	0.9409
35	>gi|347991770	gb|EGY33233.1	Peptidase_S24_26, S26_SPase_I, Inactive_signal_peptidase_IA		LepB protein [Aggregatibacter actinomycetemcomitans serotype e str. SC1083]	Virulent	0.8445		[13]
40	>gi|347991930	gb|EGY33370.1	PRX5_like; GrxC, Thioredoxin_like, AhpC		peroxiredoxin like protein [Aggregatibacter actinomycetemcomitans serotype e str. SC1083]	Virulent	0.5329
46	>gi|347992049	gb|EGY33479.1	OstA, OstA_C, PRK03761		organic solvent tolerance protein [Aggregatibacter actinomycetemcomitans serotype e str. SC1083]	Virulent	1.0966		[14]
51	>gi|347992155	gb|EGY33571.1	OM_channels, Heme/hemopexin_utilization_protein_C		outer membrane protein 64 [Aggregatibacter actinomycetemcomitans serotype e str. SC1083]	Virulent	1.0124	[6]
54	>gi|347992176	gb|EGY33592.1	TolB, TolB_N, WD40, PD40	Tol-Pal	translocation protein TolB [Aggregatibacter actinomycetemcomitans serotype e str. SC1083]	Virulent	0.9607		[15, 16]
60	>gi|347992294	gb|EGY33703.1	OM_channels, OMP_b-br1		outer membrane protein 18/16 [Aggregatibacter actinomycetemcomitans serotype e str. SC1083]	Virulent	0.9937	[6]
61	>gi|347992315	gb|EGY33724.1	CE4_SF, GHL15, AmyAc_family, hypothetical_protein_Pcar_2791		biofilm PGA synthesis lipoprotein PgaB [Aggregatibacter actinomycetemcomitans serotype e str. SC1083]	Virulent	0.8643	[17]
62	>gi|347992316	gb|EGY33725.1	DU, PGA_TPR_OMP		biofilm PGA synthesis protein PgaA precursor [Aggregatibacter actinomycetemcomitans serotype e str. SC1083]	Virulent	1.0186	[17]
65	>gi|347992425	gb|EGY33828.1		tad locus, fimbrial secretion, 99% identical to RcpC (BAJ19108.1) and 01 % identical to RcpC (WP_005577939.1)	flp operon protein C [Aggregatibacter actinomycetemcomitans serotype e str. SC1083]	Virulent	0.8861	[18, 19]
66	>gi|347992426	gb|EGY33829.1	T2SS_T3SS_pil_N, secretin		GspD protein [Aggregatibacter actinomycetemcomitans serotype e str. SC1083]	Virulent	1.0112	[18, 19]
67	>gi|347992428	gb|EGY33831.1	ABC_ATPase, CpaE	tad locus, fimbrial secretion, 97% identical to TadZ (WP_005577944.1) and 99% idnetical to TadZ BAJ19111.1)	flp operon protein D [Aggregatibacter actinomycetemcomitans serotype e str. SC1083]	Virulent	0.9922	[18, 19]
68	>gi|347992429	gb|EGY33832.1	ABC_ATPase, VirB11_like_ATPase	tad locus, fimbrial secretion	tight adherence protein A [Aggregatibacter actinomycetemcomitans serotype e str. SC1083]	Virulent	1.0219	[18, 19]
69	>gi|347992432	gb|EGY33835.1	TadD, TPR	tad locus, fimbrial secretion (putative)	putative nonspecific tight adherence protein D [Aggregatibacter actinomycetemcomitans serotype e str. SC1083]	Virulent	0.8745	[18, 19]
70	>gi|347992433	gb|EGY33836.1		tad locus, fimbrial secretion	tight adherence protein E [Aggregatibacter actinomycetemcomitans serotype e str. SC1083]	Virulent	1.1283	[19]
71	>gi|347992434	gb|EGY33837.1	TadE	tad locus, fimbrial secretion	tight adherence protein F [Aggregatibacter actinomycetemcomitans serotype e str. SC1083]	Virulent	1.0355	[19]
72	>gi|347992435	gb|EGY33838.1	vWFA	tad locus, fimbrial secretion	tight adherence protein G [Aggregatibacter actinomycetemcomitans serotype e str. SC1083]	Virulent	1.0184	[19]
74	>gi|347992510	gb|EGY33907.1			excinuclease ATPase subunit [Aggregatibacter actinomycetemcomitans serotype e str. SC1083]	Virulent	0.9048
79	>gi|347992896	gb|EGY34273.1	OmpH, MscS_TM, MS_channel, PRK11281		potassium efflux protein KefA [Aggregatibacter actinomycetemcomitans serotype e str. SC1083]	Virulent	1.0554
80	>gi|347992912	gb|EGY34289.1	YadA_anchor		putative adhesin/invasin [Aggregatibacter actinomycetemcomitans serotype e str. SC1083], putative Omp100	Virulent	1.041	[6, 20, 21]
81	>gi|347992918	gb|EGY34295.1	OmpA, OmpA_membrane, OM_channels; OmpA_C-like		outer membrane protein A [Aggregatibacter actinomycetemcomitans serotype e str. SC1083]	Virulent	0.7597		[9-11]
82	>gi|347992919	gb|EGY34296.1	Trypsin_2, Tryp_SPc, PDZ_ HhoA_like	Chaperone	protease DegQ [Aggregatibacter actinomycetemcomitans serotype e str. SC1083]	Virulent	1.0163		[22]
91	>gi|347993011	gb|EGY34388.1	BON, PRK11023		OsmY protein [Aggregatibacter actinomycetemcomitans serotype e str. SC1083]	Virulent	1.0515
92	>gi|347993014	gb|EGY34391.1	Periplasmic_Type_Binding_Protein_Type_1, PBP1_YraM_Lppc_lipoprotein_like		LppC family lipoprotein [Aggregatibacter actinomycetemcomitans serotype e str. SC1083]	Virulent	1.0278		[23]
95	>gi|347993050	gb|EGY34427.1	OEP		putative TdeA [Aggregatibacter actinomycetemcomitans serotype e str. SC1083]	Virulent	1.0281	[24]
96	>gi|347993065	gb|EGY34442.1			lipoprotein HlpB [Aggregatibacter actinomycetemcomitans serotype e str. SC1083]	Virulent	1.0212
98	>gi|347993150	gb|EGY34527.1	Pyruvate_kinase		pyruvate kinase [Aggregatibacter actinomycetemcomitans serotype e str. SC1083]	Virulent	0.8787		[25]
99	>gi|347993182	gb|EGY34559.1	Ribosomal_S9		30S ribosomal protein S9 [Aggregatibacter actinomycetemcomitans serotype e str. SC1083]	Virulent	1.0797
100	>gi|347993264	gb|EGY34638.1	Ribosomal_L2, ribosomal_L2_C		ribosomal protein L2 [Aggregatibacter actinomycetemcomitans serotype e str. SC1083]	Virulent	0.9093
104	>gi|347993278	gb|EGY34652.1	Ribosomal_S5, ribosomal_S5_C		30S ribosomal protein S5 [Aggregatibacter actinomycetemcomitans serotype e str. SC1083]	Virulent	0.2727
105	>gi|347993280	gb|EGY34654.1	Ribosomal_L18e, rp10		ribosomal protein L15 [Aggregatibacter actinomycetemcomitans serotype e str. SC1083]	Virulent	0.2944
106	>gi|347993285	gb|EGY34659.1	Ribosomal_S4, rpsD		ribosomal protein S4 [Aggregatibacter actinomycetemcomitans serotype e str. SC1083]	Virulent	1.0667
109	>gi|347993338	gb|EGY34706.1	SPFH_like, SPFH_HflK, HflK_N, HflC	FtsH protease regulator	HflK protein [Aggregatibacter actinomycetemcomitans serotype e str. SC1083]	Virulent	1.088
117	>gi|347993671	gb|EGY35012.1	Ribosomal_L19, rpIS		50S ribosomal protein L19 [Aggregatibacter actinomycetemcomitans serotype e str. SC1083]	Virulent	1.0052
118	>gi|347993680	gb|EGY35021.1	TPR, OM_Yfi0		lipoprotein [Aggregatibacter actinomycetemcomitans serotype e str. SC1083]	Virulent	0.497		[26]
121	>gi|347993787	gb|EGY35122.1	DsbB		DsbB family disulfide bond formation protein [Aggregatibacter actinomycetemcomitans serotype e str. SC1083]	Virulent	1.0406		[27]
126	>gi|347993874	gb|EGY35203.1	DUF945		hypothetical protein SC1083_0206 [Aggregatibacter actinomycetemcomitans serotype e str. SC1083]	Virulent	0.0576
127	>gi|347993877	gb|EGY35206.1	Lpam_1		outer membrane lipoprotein pcp [Aggregatibacter actinomycetemcomitans serotype e str. SC1083]	Virulent	0.5987		[28]
128	>gi|347993884	gb|EGY35213.1			hypothetical protein SC1083_0216 [Aggregatibacter actinomycetemcomitans serotype e str. SC1083]	Virulent	1.0693	[29]
130	>gi|347993937	gb|EGY35261.1	Surface antigen		outer membrane protein assembly complex, YaeT protein [Aggregatibacter actinomycetemcomitans serotype e str. SC1083]	Virulent	0.9968	[18]
131	>gi|347993938	gb|EGY35262.1	OmpH, HlpA		Omp1-like protein [Aggregatibacter actinomycetemcomitans serotype e str. SC1083]	Virulent	0.6611		[30]
138	>gi|347993284	gb|EGY34658.1	Ribosomal_S11, PRK05309		30S ribosomal protein S11 [Aggregatibacter actinomycetemcomitans serotype e str. SC1083]	Virulent	0.494
140	>gi|347990894	gb|EGY32410.1	Lipoprotein_16		pyruvate formate lyase-activating enzyme 1 [Aggregatibacter actinomycetemcomitans serotype e str. SC1083]	Virulent	0.9757
143	>gi|347991757	gb|EGY33220.1	Cu_Zn_Superoxide_Dismutase		copper/zinc superoxide dismutase [Aggregatibacter actinomycetemcomitans serotype e str. SC1083]	Virulent	1.0328
145	>gi|347990947	gb|EGY32463.1	HU_IHF		DNA-binding protein HU [Aggregatibacter actinomycetemcomitans serotype e str. SC1083]	Virulent	0.543
146	>gi|347990918	gb|EGY32434.1	AANH_like		universal stress protein A [Aggregatibacter actinomycetemcomitans serotype e str. SC1083]	Virulent	1.0841		[31]
147	>gi|347992199	gb|EGY33615.1	RTX_C, COG2931		leukotoxin [Aggregatibacter actinomycetemcomitans serotype e str. SC1083]	Virulent	1.0072	[18, 32-35]
148	>gi|347993241	gb|EGY34615.1	SIMPL		hypothetical protein SC1083_0469 [Aggregatibacter actinomycetemcomitans serotype e str. SC1083]	Virulent	0.8551
149	>gi|347991729	gb|EGY33192.1	Lipoprotein_5		factor H-binding protein [Aggregatibacter actinomycetemcomitans serotype e str. SC1083]	Virulent	0.6521		[36]
150	>gi|347992164	gb|EGY33580.1			excinuclease ABC subunit A [Aggregatibacter actinomycetemcomitans serotype e str. SC1083]	Virulent	1.1368
151	>gi|347992427	gb|EGY33830.1			rough colony protein B [Aggregatibacter actinomycetemcomitans serotype e str. SC1083]	Virulent	1.0005	[19, 37]
2	>gi|347990897	gb|EGY32413.1			hypothetical protein SC1083_2107 [Aggregatibacter actinomycetemcomitans serotype e str. SC1083]	Non-Virulent	-0.347
3	>gi|347990904	gb|EGY32420.1			thiamine biosynthesis lipoprotein ApbE [Aggregatibacter actinomycetemcomitans serotype e str. SC1083]	Non-Virulent	-0.105
4	>gi|347990945	gb|EGY32461.1			D-fructose-6-phosphate amidotransferase [Aggregatibacter actinomycetemcomitans serotype e str. SC1083]	Non-Virulent	-0.271
5	>gi|347990952	gb|EGY32468.1			phosphoenolpyruvate carboxykinase [Aggregatibacter actinomycetemcomitans serotype e str. SC1083]	Non-Virulent	-0.229
8	>gi|347991132	gb|EGY32631.1			heat shock protein HslVU, ATPase subunit HslU [Aggregatibacter actinomycetemcomitans serotype e str. SC1083]	Non-Virulent	-0.324
9	>gi|347991134	gb|EGY32633.1			lipoprotein VacJ [Aggregatibacter actinomycetemcomitans serotype e str. SC1083]	Non-Virulent	-0.528		[38]
10	>gi|347991138	gb|EGY32637.1			phosphoglucomutase/phosphomannomutase [Aggregatibacter actinomycetemcomitans serotype e str. SC1083]	Non-Virulent	-0.429
11	>gi|347991165	gb|EGY32664.1			D-methionine-binding lipoprotein MetQ [Aggregatibacter actinomycetemcomitans serotype e str. SC1083]	Non-Virulent	-0.578
12	>gi|347991190	gb|EGY32683.1			P4 lipoprotein [Aggregatibacter actinomycetemcomitans serotype e str. SC1083]	Non-Virulent	-0.159
13	>gi|347991209	gb|EGY32702.1			ribonuclease E [Aggregatibacter actinomycetemcomitans serotype e str. SC1083]	Non-Virulent	-0.836
19	>gi|347991524	gb|EGY32987.1			phosphoglycerate kinase [Aggregatibacter actinomycetemcomitans serotype e str. SC1083]	Non-Virulent	-0.359
20	>gi|347991529	gb|EGY32992.1			DNA-directed RNA polymerase, beta' subunit [Aggregatibacter actinomycetemcomitans serotype e str. SC1083]	Non-Virulent	-0.233
21	>gi|347991530	gb|EGY32993.1			DNA-directed RNA polymerase, beta subunit [Aggregatibacter actinomycetemcomitans serotype e str. SC1083]	Non-Virulent	-0.411
22	>gi|347991533	gb|EGY32996.1			ribosomal protein L1 [Aggregatibacter actinomycetemcomitans serotype e str. SC1083]	Non-Virulent	-0.271
23	>gi|347991544	gb|EGY33007.1			multiphosphoryl transfer protein [Aggregatibacter actinomycetemcomitans serotype e str. SC1083]	Non-Virulent	-0.233
25	>gi|347991592	gb|EGY33055.1			transcription termination factor Rho [Aggregatibacter actinomycetemcomitans serotype e str. SC1083]	Non-Virulent	-0.424
26	>gi|347991604	gb|EGY33067.1			peptidyl-prolyl cis-trans isomerase cyclophilin type [Aggregatibacter actinomycetemcomitans serotype e str. SC1083]	Non-Virulent	-0.808
27	>gi|347991644	gb|EGY33107.1			triose-phosphate isomerase [Aggregatibacter actinomycetemcomitans serotype e str. SC1083]	Non-Virulent	-0.359
29	>gi|347991672	gb|EGY33135.1			polynucleotide phosphorylase/polyadenylase [Aggregatibacter actinomycetemcomitans serotype e str. SC1083]	Non-Virulent	-0.238
30	>gi|347991674	gb|EGY33137.1			ATP-dependent RNA helicase [Aggregatibacter actinomycetemcomitans serotype e str. SC1083]	Non-Virulent	-0.516
31	>gi|347991697	gb|EGY33160.1			SurA protein [Aggregatibacter actinomycetemcomitans serotype e str. SC1083]	Non-Virulent	-0.866		[39]
32	>gi|347991698	gb|EGY33161.1			uracil phosphoribosyltransferase [Aggregatibacter actinomycetemcomitans serotype e str. SC1083]	Non-Virulent	-0.449
33	>gi|347991760	gb|EGY33223.1			DNA polymerase III, beta subunit [Aggregatibacter actinomycetemcomitans serotype e str. SC1083]	Non-Virulent	-0.794
34	>gi|347991765	gb|EGY33228.1	YidC_periplas, YidC, 60KD_IMP	Chaperone	putative inner membrane protein translocase component YidC [Aggregatibacter actinomycetemcomitans serotype e str. SC1083]	Non-Virulent	-0.821
36	>gi|347991777	gb|EGY33240.1			6-phosphofructokinase [Aggregatibacter actinomycetemcomitans serotype e str. SC1083]	Non-Virulent	-0.326
37	>gi|347991783	gb|EGY33246.1			formate acetyltransferase [Aggregatibacter actinomycetemcomitans serotype e str. SC1083]	Non-Virulent	-0.434
39	>gi|347991803	gb|EGY33266.1			trigger factor [Aggregatibacter actinomycetemcomitans serotype e str. SC1083]	Non-Virulent	-0.364		[40]
41	>gi|347991953	gb|EGY33393.1			F0F1 ATP synthase subunit alpha [Aggregatibacter actinomycetemcomitans serotype e str. SC1083]	Non-Virulent	-0.51
42	>gi|347991955	gb|EGY33395.1			ATP synthase F1, beta subunit [Aggregatibacter actinomycetemcomitans serotype e str. SC1083]	Non-Virulent	-0.643
43	>gi|347991965	gb|EGY33405.1			mannose-specific PTS system protein IID [Aggregatibacter actinomycetemcomitans serotype e str. SC1083]	Non-Virulent	-0.48
44	>gi|347991967	gb|EGY33407.1			PTS system mannose-specific EIIAB component [Aggregatibacter actinomycetemcomitans serotype e str. SC1083]	Non-Virulent	-0.425
45	>gi|347992015	gb|EGY33451.1			lipoprotein, putative [Aggregatibacter actinomycetemcomitans serotype e str. SC1083]	Non-Virulent	-0.078
47	>gi|347992056	gb|EGY33486.1			DNA gyrase, B subunit [Aggregatibacter actinomycetemcomitans serotype e str. SC1083]	Non-Virulent	-0.478
48	>gi|347992085	gb|EGY33510.1			L-lactate dehydrogenase LctD [Aggregatibacter actinomycetemcomitans serotype e str. SC1083]	Non-Virulent	-0.412
49	>gi|347992087	gb|EGY33512.1			ribose-Phosphate pyrophosphokinase [Aggregatibacter actinomycetemcomitans serotype e str. SC1083]	Non-Virulent	-0.303
50	>gi|347992107	gb|EGY33532.1			putrescine/spermidine ABC transporter ATPase protein [Aggregatibacter actinomycetemcomitans serotype e str. SC1083]	Non-Virulent	-0.496
52	>gi|347992169	gb|EGY33585.1			cytochrome bd ubiquinol oxidase subunit I [Aggregatibacter actinomycetemcomitans serotype e str. SC1083]	Non-Virulent	-0.474
53	>gi|347992173	gb|EGY33589.1	Protein_TolQ, MotA_ExbB	Tol-Pal	protein TolQ [Aggregatibacter actinomycetemcomitans serotype e str. SC1083]	Non-Virulent	-0.14		[16]
55	>gi|347992177	gb|EGY33593.1	OmpA, OmpA_C-like	Tol-Pal, E. coli Pal is a pathogen that is released into the bloodstream during infection. A.a. Pal is an antigen and not only present in OMV but also relased in soluble form	peptidoglycan-associated lipoprotein [Aggregatibacter actinomycetemcomitans serotype e str. SC1083]	Non-Virulent	-0.738	[41-43]
56	>gi|347992196	gb|EGY33612.1			serine hydroxymethyltransferase [Aggregatibacter actinomycetemcomitans serotype e str. SC1083]	Non-Virulent	-0.366
57	>gi|347992202	gb|EGY33618.1			MtlA protein [Aggregatibacter actinomycetemcomitans serotype e str. SC1083]	Non-Virulent	-0.251
58	>gi|347992223	gb|EGY33639.1	secD, SecD_TM1, MMPL, Sec_GG, protein_translocase_subunit_SecF	Sec translocon	protein-export membrane protein SecD [Aggregatibacter actinomycetemcomitans serotype e str. SC1083]	Non-Virulent	-0.844
59	>gi|347992290	gb|EGY33699.1			NAD nucleotidase [Aggregatibacter actinomycetemcomitans serotype e str. SC1083]	Non-Virulent	-0.622
63	>gi|347992394	gb|EGY33797.1			heat shock protein 90 [Aggregatibacter actinomycetemcomitans serotype e str. SC1083]	Non-Virulent	-0.48
64	>gi|347992397	gb|EGY33800.1			cell division protein FtsZ [Aggregatibacter actinomycetemcomitans serotype e str. SC1083]	Non-Virulent	-0.344
73	>gi|347992502	gb|EGY33899.1	Clp_N, ABC_ATPase, AAA, Walker A and B motif	Chaperone	ATP-dependent chaperone ClpB [Aggregatibacter actinomycetemcomitans serotype e str. SC1083]	Non-Virulent	-0.31		[44]
75	>gi|347992578	gb|EGY33970.1			ATP-dependent protease La [Aggregatibacter actinomycetemcomitans serotype e str. SC1083]	Non-Virulent	-0.521
76	>gi|347992589	gb|EGY33981.1			cysteine synthase A [Aggregatibacter actinomycetemcomitans serotype e str. SC1083]	Non-Virulent	-0.575
77	>gi|347992825	gb|EGY34202.1			HflC protein [Aggregatibacter actinomycetemcomitans serotype e str. SC1083]	Non-Virulent	-0.243
78	>gi|347992882	gb|EGY34259.1			ribosomal protein S1 [Aggregatibacter actinomycetemcomitans serotype e str. SC1083]	Non-Virulent	-0.241
83	>gi|347992957	gb|EGY34334.1			hypothetical protein SC1083_0726 [Aggregatibacter actinomycetemcomitans serotype e str. SC1083]	Non-Virulent	-0.312
84	>gi|347992958	gb|EGY34335.1			pyridine nucleotide transhydrogenase [Aggregatibacter actinomycetemcomitans serotype e str. SC1083]	Non-Virulent	-0.366
85	>gi|347992980	gb|EGY34357.1			phosphate acetyltransferase [Aggregatibacter actinomycetemcomitans serotype e str. SC1083]	Non-Virulent	-0.384
86	>gi|347992981	gb|EGY34358.1			acetate kinase [Aggregatibacter actinomycetemcomitans serotype e str. SC1083]	Non-Virulent	-0.389
87	>gi|347992988	gb|EGY34365.1			pyruvate dehydrogenase subunit E1 [Aggregatibacter actinomycetemcomitans serotype e str. SC1083]	Non-Virulent	-0.402
88	>gi|347992989	gb|EGY34366.1			dihydrolipoamide acetyltransferase component of pyruvate dehydrogenase complex [Aggregatibacter actinomycetemcomitans serotype e str. SC1083]	Non-Virulent	-0.403
89	>gi|347992990	gb|EGY34367.1			dihydrolipoyl dehydrogenase [Aggregatibacter actinomycetemcomitans serotype e str. SC1083]	Non-Virulent	-0.143
90	>gi|347992992	gb|EGY34369.1			signal peptide peptidase SppA, 67K type [Aggregatibacter actinomycetemcomitans serotype e str. SC1083]	Non-Virulent	-0.133
93	>gi|347993017	gb|EGY34394.1			Ndh protein [Aggregatibacter actinomycetemcomitans serotype e str. SC1083]	Non-Virulent	-0.537
94	>gi|347993022	gb|EGY34399.1			threonyl-tRNA synthetase [Aggregatibacter actinomycetemcomitans serotype e str. SC1083]	Non-Virulent	-0.363
97	>gi|347993073	gb|EGY34450.1			ferritin like protein-1 [Aggregatibacter actinomycetemcomitans serotype e str. SC1083]	Non-Virulent	-0.857
101	>gi|347993267	gb|EGY34641.1			ribosomal protein S3 [Aggregatibacter actinomycetemcomitans serotype e str. SC1083]	Non-Virulent	-0.406
102	>gi|347993273	gb|EGY34647.1			50S ribosomal protein L5 [Aggregatibacter actinomycetemcomitans serotype e str. SC1083]	Non-Virulent	-0.106
103	>gi|347993276	gb|EGY34650.1			50S ribosomal protein L6 [Aggregatibacter actinomycetemcomitans serotype e str. SC1083]	Non-Virulent	-0.091
107	>gi|347993286	gb|EGY34660.1			DNA-directed RNA polymerase, alpha subunit [Aggregatibacter actinomycetemcomitans serotype e str. SC1083]	Non-Virulent	-0.383
108	>gi|347993337	gb|EGY34705.1			HflC protein [Aggregatibacter actinomycetemcomitans serotype e str. SC1083]	Non-Virulent	-0.127
110	>gi|347993358	gb|EGY34726.1			FadL protein [Aggregatibacter actinomycetemcomitans serotype e str. SC1083]	Non-Virulent	-0.645
111	>gi|347993386	gb|EGY34754.1			glyceraldehyde-3-phosphate dehydrogenase, type I [Aggregatibacter actinomycetemcomitans serotype e str. SC1083]	Non-Virulent	-0.866
112	>gi|347993506	gb|EGY34861.1			phosphoenolpyruvate-protein phosphotransferase [Aggregatibacter actinomycetemcomitans serotype e str. SC1083]	Non-Virulent	-0.403
113	>gi|347993645	gb|EGY34986.1			outer membrane antigenic lipoprotein B [Aggregatibacter actinomycetemcomitans serotype e str. SC1083]	Non-Virulent	-0.567		[45]
114	>gi|347993653	gb|EGY34994.1			MdlB protein [Aggregatibacter actinomycetemcomitans serotype e str. SC1083]	Non-Virulent	-0.676
115	>gi|347993656	gb|EGY34997.1			ribosomal protein S6 [Aggregatibacter actinomycetemcomitans serotype e str. SC1083]	Non-Virulent	-0.508
116	>gi|347993662	gb|EGY35003.1			glycerophosphoryl diester phosphodiesterase [Aggregatibacter actinomycetemcomitans serotype e str. SC1083]	Non-Virulent	-0.223
119	>gi|347993756	gb|EGY35094.1			transketolase [Aggregatibacter actinomycetemcomitans serotype e str. SC1083]	Non-Virulent	-0.448
120	>gi|347993757	gb|EGY35095.1			transaldolase [Aggregatibacter actinomycetemcomitans serotype e str. SC1083]	Non-Virulent	-0.279
122	>gi|347993841	gb|EGY35170.1			cysteine desulfurase IscS [Aggregatibacter actinomycetemcomitans serotype e str. SC1083]	Non-Virulent	-0.489
123	>gi|347993846	gb|EGY35175.1			ferric transporter ATP-binding subunit [Aggregatibacter actinomycetemcomitans serotype e str. SC1083]	Non-Virulent	-0.729
124	>gi|347993867	gb|EGY35196.1	outer membrane channels, porins		outer membrane protein 39 [Aggregatibacter actinomycetemcomitans serotype e str. SC1083]	Non-Virulent	-0.76	[6, 18]
125	>gi|347993873	gb|EGY35202.1			heat shock protein 70 [Aggregatibacter actinomycetemcomitans serotype e str. SC1083]	Non-Virulent	-0.248
129	>gi|347993910	gb|EGY35234.1			elongation factor G [Aggregatibacter actinomycetemcomitans serotype e str. SC1083]	Non-Virulent	-0.346
132	>gi|347994057	gb|EGY35376.1	SecA_PP_bind, SecA_SW, PRK12904	Sec translocon	preprotein translocase, SecA subunit [Aggregatibacter actinomycetemcomitans serotype e str. SC1083]	Non-Virulent	-0.433
133	>gi|347994075	gb|EGY35394.1			penicillin-binding protein 1A [Aggregatibacter actinomycetemcomitans serotype e str. SC1083]	Non-Virulent	-0.462
134	>gi|347994098	gb|EGY35417.1			AcrA protein [Aggregatibacter actinomycetemcomitans serotype e str. SC1083]	Non-Virulent	-0.631		[46]
135	>gi|347994099	gb|EGY35418.1			acriflavine resistance protein [Aggregatibacter actinomycetemcomitans serotype e str. SC1083]	Non-Virulent	-0.788
136	>gi|347993262	gb|EGY34636.1			ribosomal protein L4/L1 family [Aggregatibacter actinomycetemcomitans serotype e str. SC1083]	Non-Virulent	-0.548
137	>gi|347993261	gb|EGY34635.1			ribosomal protein L3 [Aggregatibacter actinomycetemcomitans serotype e str. SC1083]	Non-Virulent	-0.223
139	>gi|347993161	gb|EGY34538.1			asparaginyl-tRNA synthetase [Aggregatibacter actinomycetemcomitans serotype e str. SC1083]	Non-Virulent	-0.454
141	>gi|347993507	gb|EGY34862.1			glucose-specific PTS system component [Aggregatibacter actinomycetemcomitans serotype e str. SC1083]	Non-Virulent	-0.55
142	>gi|347992104	gb|EGY33529.1			spermidine/putrescine-binding periplasmic protein 1 precursor [Aggregatibacter actinomycetemcomitans serotype e str. SC1083]	Non-Virulent	-0.512
144	>gi|347990866	gb|EGY32382.1			aspartate ammonia-lyase [Aggregatibacter actinomycetemcomitans serotype e str. SC1083]	Non-Virulent	-0.374
References
1. Goulhen F, Hafezi A, Uitto VJ, Hinode D, Nakamura R, Grenier D, et al. Subcellular localization and cytotoxic activity of the GroEL-like protein isolated from Actinobacillus actinomycetemcomitans. Infect Immun. 1998; 66: 5307-5313. PMID: 9784537.
2. Kirby AC, Meghji S, Nair SP, White P, Reddi K, Nishihara T, et al. The potent bone-resorbing mediator of Actinobacillus actinomycetemcomitans is homologous to the molecular chaperone GroEL. J Clin Invest. 1995; 96: 1185-1194. PMID: 7657790.
3. Koga T, Kusuzaki T, Asakawa H, Senpuku H, Nishihara T, Noguchi T. The 64-kilodalton GroEL-like protein of Actinobacillus actinomycetemcomitans. J Periodontal Res. 1993; 28: 475-477. PMID: 7903360.
4. Lin FY, Hsiao FP, Huang CY, Shih CM, Tsao NW, Tsai CS, et al. Porphyromonas gingivalis GroEL induces osteoclastogenesis of periodontal ligament cells and enhances alveolar bone resorption in rats. PLoS One. 2014; 9: e102450. PMID: 25058444.
5. Paju S, Goulhen F, Asikainen S, Grenier D, Mayrand D, Uitto V. Localization of heat shock proteins in clinical Actinobacillus actinomycetemcomitans strains and their effects on epithelial cell proliferation. FEMS Microbiol Lett. 2000; 182:231-235. PMID: 10620671.
6. Komatsuzawa H, Asakawa R, Kawai T, Ochiai K, Fujiwara T, Taubman MA, et al. Identification of six major outer membrane proteins from Actinobacillus actinomycetemcomitans. Gene. 2002; 288: 195-201. PMID: 12034509.
7. Wilson ME. IgG antibody response of localized juvenile periodontitis patients to the 29 kilodalton outer membrane protein of Actinobacillus actinomycetemcomitans. J Periodontol. 1991; 62: 211-218. PMID: 2027074.
8. Wilson ME, Hamilton RG. Immunoglobulin G subclass response of juvenile periodontitis subjects to principal outer membrane proteins of Actinobacillus actinomycetemcomitans. Infect Immun. 1995; 63: 1062-1069. PMID: 7868228.
9. Jin JS, Kwon S-O, Moon DC, Gurung M, Lee JH, Kim SI, et al. Acinetobacter baumannii Secretes Cytotoxic Outer Membrane Protein A via Outer Membrane Vesicles. PLoS One. 2011; 6: e17027. PMID: 21386968.
10. Kim SW, Choi CH, Moon DC, Jin JS, Lee JH, Shin JH, et al. Serum resistance of Acinetobacter baumannii through the binding of factor H to outer membrane proteins. FEMS Microbiol Lett. 2009; 301: 224-231. PMID: 19878322.
11. Wooster DG, Maruvada R, Blom AM, Prasadarao NV. Logarithmic phase Escherichia coli K1 efficiently avoids serum killing by promoting C4bp-mediated C3b and C4b degradation. Immunology. 2006; 117: 482-493. PMID: 16556262.
12. Torres AG, Redford P, Welch RA, Payne SM. TonB-dependent systems of uropathogenic Escherichia coli: aerobactin and heme transport and TonB are required for virulence in the mouse. Infect Immun. 2001; 69: 6179-6185. PMID: 11553558.
13. Waite RD, Rose RS, Rangarajan M, Aduse-Opoku J, Hashim A, Curtis MA. Pseudomonas aeruginosa possesses two putative type I signal peptidases, LepB and PA1303, each with distinct roles in physiology and virulence. J Bacteriol. 2012; 194: 4521-4536. PMID: 22730125.
14. Chiu HC, Lin TL, Wang JT. Identification and characterization of an organic solvent tolerance gene in Helicobacter pylori. Helicobacter. 2007; 12: 74-81. PMID: 17241305.
15. Bowe F, Lipps CJ, Tsolis RM, Groisman E, Heffron F, Kusters JG. At least four percent of the Salmonella typhimurium genome is required for fatal infection of mice. Infect Immun. 1998; 66: 3372-3377. PMID: 9632607.
16. Dubuisson JF, Vianney A, Hugouvieux-Cotte-Pattat N, Lazzaroni JC. Tol-Pal proteins are critical cell envelope components of Erwinia chrysanthemi affecting cell morphology and virulence. Microbiology. 2005; 151: 3337-3347. PMID: 16207916.
17. Kaplan JB, Velliyagounder K, Ragunath C, Rohde H, Mack D, Knobloch JK, et al. Genes involved in the synthesis and degradation of matrix polysaccharide in Actinobacillus actinomycetemcomitans and Actinobacillus pleuropneumoniae biofilms. J Bacteriol. 2004; 186: 8213-8220. PMID: 15576769.
18. Rylev M, Abduljabar AB, Reinholdt J, Ennibi OK, Haubek D, Birkelund S, et al. Proteomic and immunoproteomic analysis of Aggregatibacter actinomycetemcomitans JP2 clone strain HK1651. J Proteomics. 2011; 74: 2972-2985. PMID: 21867783.
19. Schreiner HC, Sinatra K, Kaplan JB, Furgang D, Kachlany SC, Planet PJ, et al. Tight-adherence genes of Actinobacillus actinomycetemcomitans are required for virulence in a rat model. Proc Natl Acad Sci U S A. 2003; 100: 7295-7300. PMID: 12756291.
20. Asakawa R, Komatsuzawa H, Kawai T, Yamada S, Goncalves RB, Izumi S, et al. Outer membrane protein 100, a versatile virulence factor of Actinobacillus actinomycetemcomitans. Mol Microbiol. 2003; 50: 1125-1139. PMID: 14622404.
21. Yue G, Kaplan JB, Furgang D, Mansfield KG, Fine DH. A second Aggregatibacter actinomycetemcomitans autotransporter adhesin exhibits specificity for buccal epithelial cells in humans and Old World primates. Infect Immun. 2007; 75: 4440-4448. PMID: 17620359.
22. Farn J, Roberts M. Effect of inactivation of the HtrA-like serine protease DegQ on the virulence of Salmonella enterica serovar Typhimurium in mice. Infect Immun. 2004; 72: 7357-7359. PMID: 15557668.
23. Oldfield NJ, Donovan EA, Worrall KE, Wooldridge KG, Langford PR, Rycroft AN, et al. Identification and characterization of novel antigenic vaccine candidates of Actinobacillus pleuropneumoniae. Vaccine. 2008; 26: 1942-1954. PMID: 18342410.
24. Crosby JA, Kachlany SC. TdeA, a TolC-like protein required for toxin and drug export in Aggregatibacter (Actinobacillus) actinomycetemcomitans. Gene. 2007; 388: 83-92. PMID: 17116373.
25. Bucker R, Heroven AK, Becker J, Dersch P, Wittmann C. The pyruvate-tricarboxylic acid cycle node: a focal point of virulence control in the enteric pathogen Yersinia pseudotuberculosis. J Biol Chem. 2014; 289: 30114-30132. PMID: 25164818.
26. Fardini Y, Trotereau J, Bottreau E, Souchard C, Velge P, Virlogeux-Payant I. Investigation of the role of the BAM complex and SurA chaperone in outer-membrane protein biogenesis and type III secretion system expression in Salmonella. Microbiology. 2009; 155: 1613-1622. PMID: 19372159.
27. Heras B, Shouldice SR, Totsika M, Scanlon MJ, Schembri MA, Martin JL. DSB proteins and bacterial pathogenicity. Nat Rev Microbiol. 2009; 7: 215-225. PMID: 19198617.
28. Myers-Morales T, Cowan C, Gray ME, Wulff CR, Parker CE, Borchers CH, et al. A surface-focused biotinylation procedure identifies the Yersinia pestis catalase KatY as a membrane-associated but non-surface-located protein. Appl Environ Microbiol. 2007; 73: 5750-5759. PMID: 17644638.
29. Paino A, Ahlstrand T, Nuutila J, Navickaite I, Lahti M, Tuominen H, et al. Identification of a novel bacterial outer membrane interleukin-1Beta-binding protein from Aggregatibacter actinomycetemcomitans. PLoS One. 2013; 8: e70509. PMID: 23936223.
30. Rowley G, Skovierova H, Stevenson A, Rezuchova B, Homerova D, Lewis C, et al. The periplasmic chaperone Skp is required for successful Salmonella Typhimurium infection in a murine typhoid model. Microbiology. 2011; 157: 848-858. PMID: 21148205.
31. Liu WT, Karavolos MH, Bulmer DM, Allaoui A, Hormaeche RD, Lee JJ, et al. Role of the universal stress protein UspA of Salmonella in growth arrest, stress and virulence. Microb Pathog. 2007; 42: 2-10. PMID: 17081727.
32. Johansson A. Aggregatibacter actinomycetemcomitans leukotoxin: a powerful tool with capacity to cause imbalance in the host inflammatory response. Toxins (Basel). 2011; 3: 242-59. PMID: 22069708.
33. Lally ET, Golub EE, Kieba IR, Taichman NS, Rosenbloom J, Rosenbloom JC, et al. Analysis of the Actinobacillus actinomycetemcomitans leukotoxin gene. Delineation of unique features and comparison to homologous toxins. J Biol Chem. 1989; 264: 15451-15456. PMID: 2670940.
34. Munksgaard PS, Vorup-Jensen T, Reinholdt J, Söderström CM, Poulsen K, Leipziger J, et al. Leukotoxin from Aggregatibacter actinomycetemcomitans causes shrinkage and P2X receptor-dependent lysis of human erythrocytes. Cell Microbiol. 2012; 14: 1904-1920. PMID: 22906303.
35. Simpson DL, Berthold P, Taichman NS. Killing of human myelomonocytic leukemia and lymphocytic cell lines by Actinobacillus actinomycetemcomitans leukotoxin. Infect Immun. 1988; 56: 1162-1166. PMID: 3258584.
36. McNeil LK, Zagursky RJ, Lin SL, Murphy E, Zlotnick GW, Hoiseth SK, et al. Role of factor H binding protein in Neisseria meningitidis virulence and its potential as a vaccine candidate to broadly protect against meningococcal disease. Microbiol Mol Biol Rev. 2013; 77: 234-252. PMID: 23699256.
37. Perez BA, Planet PJ, Kachlany SC, Tomich M, Fine DH, Figurski DH. Genetic analysis of the requirement for flp-2, tadV, and rcpB in Actinobacillus actinomycetemcomitans biofilm formation. J Bacteriol. 2006; 188: 6361-6375. PMID: 16923904.
38. Suzuki T, Murai T, Fukuda I, Tobe T, Yoshikawa M, Sasakawa C. Identification and characterization of a chromosomal virulence gene, vacJ, required for intercellular spreading of Shigella flexneri. Mol Microbiol. 1994; 11: 31-41. PMID: 8145644.
39. Kale A, Phansopa C, Suwannachart C, Craven CJ, Rafferty JB, Kelly DJ. The virulence factor PEB4 (Cj0596) and the periplasmic protein Cj1289 are two structurally related SurA-like chaperones in the human pathogen Campylobacter jejuni. J Biol Chem. 2011; 286: 21254-21265. PMID: 21524997.
40. Wu T, Zhao Z, Zhang L, Ma H, Lu K, Ren W, et al. Trigger factor of Streptococcus suis is involved in stress tolerance and virulence. Microb Pathog. 2011; 51: 69-76. PMID: 21093574.
41. Karched M, Ihalin R, Eneslätt K, Zhong D, Oscarsson J, Wai SN, et al. Vesicle-independent extracellular release of a proinflammatory outer membrane lipoprotein in free-soluble form. BMC Microbiol. 2008; 8:18. PMID: 18226201.
42. Oscarsson J, Karched M, Thay B, Chen C, Asikainen S. Proinflammatory effect in whole blood by free-soluble bacterial components released from planktonic and biofilm cells. BMC Microbiol. 2008; 8: 206. PMID: 19038023.
43. Paul-Satyaseela M, Karched M, Bian Z, Ihalin R, Boren T, Arnqvist A, et al. Immunoproteomics of Actinobacillus actinomycetemcomitans outer-membrane proteins reveal a highly immunoreactive peptidoglycan-associated lipoprotein. J Med Microbiol. 2006; 55: 931-942. PMID: 16772422.
44. de Oliveira NE, Abranches J, Gaca AO, Laport MS, Damaso CR, Bastos Mdo C, et al. clpB, a class III heat-shock gene regulated by CtsR, is involved in thermotolerance and virulence of Enterococcus faecalis. Microbiology. 2011;157(Pt 3):656-65. doi: 10.1099/mic.0.041897-0. PMID: 21148206.
45. Fadl AA, Sha J, Klimpel GR, Olano JP, Niesel DW, Chopra AK. Murein lipoprotein is a critical outer membrane component involved in Salmonella enterica serovar typhimurium systemic infection. Infect Immun. 2005; 73: 1081-1096. PMID: 15664952.
46. Blair JM, La Ragione RM, Woodward MJ, Piddock LJ. Periplasmic adaptor protein AcrA has a distinct role in the antibiotic resistance and virulence of Salmonella enterica serovar Typhimurium. J Antimicrob Chemother. 2009; 64: 965-972. PMID: 19744979.
