# Supplementary material for: Proteomics of Aggregatibacter actinomycetemcomitans Outer Membrane Vesicles
Source: PLoS One. 2015 Sep 18;10(9):e0138591. doi: 10.1371/journal.pone.0138591 (PMC4575117; doi:10.1371/journal.pone.0138591)
Supplement: S4 Table — (XLSX) [file pone.0138591.s005.xlsx]

## Sheet: 2015_06_12_All_identifiers_hitd
S4 Table. COG definitions for all gene models of A. actinomycetemcomitans serotype e strain SC1083 according to National Center for Biotechnology Information (NCBI).
Query	Sequence identifier	Hit type	PSSM-ID	From	To	E-Value	Bitscore	COG Accession	Short name	Incomplete	Superfamily	Protein description	COG Definition
Q#1095	EGY34084	specific	223406	1	292	2.87784e-99	296.073	COG0329	DapA	-	cl21457	Dihydrodipicolinate synthase/N-acetylneuraminate lyase	[Amino acid transport and metabolism, Cell wall/membrane/envelope biogenesis]
Q#1288	EGY34718	specific	223406	4	297	5.35294e-131	377.35	COG0329	DapA	-	cl21457	Dihydrodipicolinate synthase/N-acetylneuraminate lyase	[Amino acid transport and metabolism, Cell wall/membrane/envelope biogenesis]
Q#973	EGY35237	multi-dom	223137	1	157	7.83009e-62	200.898	COG0059	IlvC	N	-	Ketol-acid reductoisomerase	[Amino acid transport and metabolism, Coenzyme transport and metabolism]
Q#563	EGY34866	specific	223193	3	193	4.35649e-21	87.448	COG0115	IlvE	-	cl00224	Branched-chain amino acid aminotransferase/4-amino-4-deoxychorismate lyase	[Amino acid transport and metabolism, Coenzyme transport and metabolism]
Q#1042	EGY34031	specific	223193	30	328	1.26139e-92	280.433	COG0115	IlvE	-	cl00224	Branched-chain amino acid aminotransferase/4-amino-4-deoxychorismate lyase	[Amino acid transport and metabolism, Coenzyme transport and metabolism]
Q#401	EGY34498	multi-dom	223225	13	508	8.95072e-176	506.108	COG0147	TrpE	-	-	Anthranilate/para-aminobenzoate synthases component I	[Amino acid transport and metabolism, Coenzyme transport and metabolism]
Q#564	EGY34867	multi-dom	223225	69	322	7.71645e-80	252.647	COG0147	TrpE	N	-	Anthranilate/para-aminobenzoate synthases component I	[Amino acid transport and metabolism, Coenzyme transport and metabolism]
Q#402	EGY34499	multi-dom	223586	1	189	2.14115e-89	262.873	COG0512	PabA	-	-	Anthranilate/para-aminobenzoate synthase component II	[Amino acid transport and metabolism, Coenzyme transport and metabolism]
Q#565	EGY34868	multi-dom	223586	1	185	4.81852e-78	233.983	COG0512	PabA	-	-	Anthranilate/para-aminobenzoate synthase component II	[Amino acid transport and metabolism, Coenzyme transport and metabolism]
Q#314	EGY34411	multi-dom	223991	1	346	6.20777e-77	242.672	COG1063	Tdh	-	-	Threonine dehydrogenase or related Zn-dependent dehydrogenase	[Amino acid transport and metabolism, General function prediction only]
Q#1214	EGY33506	non-specific	224090	45	238	3.26381e-11	62.3019	COG1168	MalY	C	cl18945	Bifunctional PLP-dependent enzyme with beta-cystathionase and maltose regulon repressor activities	[Amino acid transport and metabolism, General function prediction only]
Q#1423	EGY33660	non-specific	224090	140	373	1.16607e-06	48.8199	COG1168	MalY	N	cl18945	Bifunctional PLP-dependent enzyme with beta-cystathionase and maltose regulon repressor activities	[Amino acid transport and metabolism, General function prediction only]
Q#1940	EGY33182	non-specific	224090	79	369	1.644e-25	105.059	COG1168	MalY	-	cl18945	Bifunctional PLP-dependent enzyme with beta-cystathionase and maltose regulon repressor activities	[Amino acid transport and metabolism, General function prediction only]
Q#2037	EGY32521	non-specific	224090	1	114	1.76386e-38	134.334	COG1168	MalY	C	cl18945	Bifunctional PLP-dependent enzyme with beta-cystathionase and maltose regulon repressor activities	[Amino acid transport and metabolism, General function prediction only]
Q#1333	EGY33570	multi-dom	225726	74	93	0.00152064	35.776	COG3185	HppD	NC	-	4-hydroxyphenylpyruvate dioxygenase and related hemolysins	[Amino acid transport and metabolism, General function prediction only]
Q#833	EGY32710	multi-dom	223521	7	320	5.37912e-178	498.637	COG0444	DppD	-	-	ABC-type dipeptide/oligopeptide/nickel transport system, ATPase component	[Amino acid transport and metabolism, Inorganic ion transport and metabolism]
Q#835	EGY32712	multi-dom	223674	1	306	2.15315e-118	346.014	COG0601	DppB	-	-	ABC-type dipeptide/oligopeptide/nickel transport system, permease component	[Amino acid transport and metabolism, Inorganic ion transport and metabolism]
Q#2035	EGY32519	multi-dom	224049	161	396	7.67496e-25	101.187	COG1124	DppF	-	-	ABC-type dipeptide/oligopeptide/nickel transport system, ATPase component	[Amino acid transport and metabolism, Inorganic ion transport and metabolism]
Q#834	EGY32711	multi-dom	224094	28	312	1.42662e-102	304.954	COG1173	DppC	-	-	ABC-type dipeptide/oligopeptide/nickel transport system, permease component	[Amino acid transport and metabolism, Inorganic ion transport and metabolism]
Q#737	EGY33361	multi-dom	223904	29	258	5.75547e-51	169.798	COG0834	HisJ	-	-	ABC-type amino acid transport/signal transduction system, periplasmic component/domain	[Amino acid transport and metabolism, Signal transduction mechanisms]
Q#1477	EGY33818	multi-dom	223904	1	237	1.40091e-48	162.865	COG0834	HisJ	-	-	ABC-type amino acid transport/signal transduction system, periplasmic component/domain	[Amino acid transport and metabolism, Signal transduction mechanisms]
Q#1657	EGY35016	multi-dom	223085	10	425	9.70102e-95	292.793	COG0006	PepP	-	-	Xaa-Pro aminopeptidase	[Amino acid transport and metabolism]
Q#2058	EGY32803	multi-dom	223085	6	248	7.26903e-30	115.602	COG0006	PepP	N	-	Xaa-Pro aminopeptidase	[Amino acid transport and metabolism]
Q#815	EGY32692	specific	223093	1	420	0	670.422	COG0014	ProA	-	cl11961	Gamma-glutamyl phosphate reductase	[Amino acid transport and metabolism]
Q#23	EGY33482	multi-dom	223098	1	391	0	519.526	COG0019	LysA	-	-	Diaminopimelate decarboxylase	[Amino acid transport and metabolism]
Q#963	EGY33981	specific	223110	1	260	2.70463e-104	307.926	COG0031	CysK	-	cl00342	Cysteine synthase	[Amino acid transport and metabolism]
Q#1614	EGY34973	non-specific	223110	2	238	4.54005e-19	82.9692	COG0031	CysK	-	cl00342	Cysteine synthase	[Amino acid transport and metabolism]
Q#492	EGY33881	multi-dom	223118	1	144	1.97622e-57	183.21	COG0040	HisG	NC	-	ATP phosphoribosyltransferase	[Amino acid transport and metabolism]
Q#493	EGY33882	multi-dom	223118	1	45	1.0075e-14	64.5682	COG0040	HisG	N	-	ATP phosphoribosyltransferase	[Amino acid transport and metabolism]
Q#1457	EGY33798	multi-dom	223155	106	382	3.72942e-130	378.108	COG0077	PheA2	-	-	Prephenate dehydratase	[Amino acid transport and metabolism]
Q#874	EGY34630	multi-dom	223156	2	333	0	512.9	COG0078	ArgF	-	-	Ornithine carbamoyltransferase	[Amino acid transport and metabolism]
Q#1213	EGY33505	multi-dom	223157	3	40	9.91743e-11	53.8564	COG0079	HisC	N	-	Histidinol-phosphate/aromatic aminotransferase or cobyric acid decarboxylase	[Amino acid transport and metabolism]
Q#1214	EGY33506	multi-dom	223157	6	307	5.69364e-98	296.147	COG0079	HisC	-	-	Histidinol-phosphate/aromatic aminotransferase or cobyric acid decarboxylase	[Amino acid transport and metabolism]
Q#1423	EGY33660	multi-dom	223157	33	372	2.89726e-79	249.923	COG0079	HisC	-	-	Histidinol-phosphate/aromatic aminotransferase or cobyric acid decarboxylase	[Amino acid transport and metabolism]
Q#177	EGY34274	specific	223160	2	357	0	584.149	COG0082	AroC	-	cl00323	Chorismate synthase	[Amino acid transport and metabolism]
Q#1280	EGY34710	multi-dom	223161	1	314	3.68883e-139	398.511	COG0083	ThrB	-	-	Homoserine kinase	[Amino acid transport and metabolism]
Q#499	EGY33888	non-specific	223184	3	36	1.36845e-13	61.0518	COG0106	HisA	C	cl21457	Phosphoribosylformimino-5-aminoimidazole carboxamide ribonucleotide (ProFAR) isomerase	[Amino acid transport and metabolism]
Q#500	EGY33889	non-specific	223184	1	182	2.30932e-63	197.798	COG0106	HisA	N	cl21457	Phosphoribosylformimino-5-aminoimidazole carboxamide ribonucleotide (ProFAR) isomerase	[Amino acid transport and metabolism]
Q#1879	EGY33121	non-specific	223184	100	250	0.000885451	39.0954	COG0106	HisA	N	cl21457	Phosphoribosylformimino-5-aminoimidazole carboxamide ribonucleotide (ProFAR) isomerase	[Amino acid transport and metabolism]
Q#501	EGY33890	non-specific	223185	1	41	9.783e-17	69.5103	COG0107	HisF	C	cl21457	Imidazole glycerol phosphate synthase subunit HisF	[Amino acid transport and metabolism]
Q#1375	EGY33612	specific	223190	6	419	0	722.457	COG0112	GlyA	-	cl18945	Glycine/serine hydroxymethyltransferase	[Amino acid transport and metabolism]
Q#220	EGY34317	non-specific	223196	76	192	8.04517e-09	54.5164	COG0118	HisH	N	cl00020	Imidazoleglycerol phosphate synthase glutamine amidotransferase subunit HisH	[Amino acid transport and metabolism]
Q#402	EGY34499	non-specific	223196	56	188	4.71035e-09	52.2052	COG0118	HisH	N	cl00020	Imidazoleglycerol phosphate synthase glutamine amidotransferase subunit HisH	[Amino acid transport and metabolism]
Q#498	EGY33887	specific	223196	1	197	5.58602e-103	297.963	COG0118	HisH	-	cl00020	Imidazoleglycerol phosphate synthase glutamine amidotransferase subunit HisH	[Amino acid transport and metabolism]
Q#565	EGY34868	non-specific	223196	63	186	3.47383e-12	60.6796	COG0118	HisH	N	cl00020	Imidazoleglycerol phosphate synthase glutamine amidotransferase subunit HisH	[Amino acid transport and metabolism]
Q#1273	EGY32745	non-specific	223196	306	384	2.35923e-05	44.116	COG0118	HisH	C	cl00020	Imidazoleglycerol phosphate synthase glutamine amidotransferase subunit HisH	[Amino acid transport and metabolism]
Q#1212	EGY33504	multi-dom	223206	6	432	0	526.013	COG0128	AroA	-	-	5-enolpyruvylshikimate-3-phosphate synthase	[Amino acid transport and metabolism]
Q#1299	EGY34729	multi-dom	223206	10	415	1.65929e-24	103.064	COG0128	AroA	-	-	5-enolpyruvylshikimate-3-phosphate synthase	[Amino acid transport and metabolism]
Q#495	EGY33884	non-specific	223209	1	64	5.12555e-35	118.462	COG0131	HisB2	NC	cl00341	Imidazoleglycerol phosphate dehydratase HisB	[Amino acid transport and metabolism]
Q#496	EGY33885	non-specific	223209	2	66	6.96006e-31	107.677	COG0131	HisB2	N	cl00341	Imidazoleglycerol phosphate dehydratase HisB	[Amino acid transport and metabolism]
Q#426	EGY34523	specific	223211	2	396	0	773.682	COG0133	TrpB	-	cl00342	Tryptophan synthase beta chain	[Amino acid transport and metabolism]
Q#408	EGY34505	specific	223212	16	272	5.71831e-118	341.879	COG0134	TrpC	-	cl21457	Indole-3-glycerol phosphate synthase	[Amino acid transport and metabolism]
Q#409	EGY34506	specific	223213	2	165	2.2543e-61	190.932	COG0135	TrpF	-	cl21457	Phosphoribosylanthranilate isomerase	[Amino acid transport and metabolism]
Q#508	EGY33897	multi-dom	223214	1	369	1.47394e-142	410.85	COG0136	Asd	-	-	Aspartate-semialdehyde dehydrogenase	[Amino acid transport and metabolism]
Q#2091	EGY32830	multi-dom	223214	5	319	6.25379e-58	191.671	COG0136	Asd	-	-	Aspartate-semialdehyde dehydrogenase	[Amino acid transport and metabolism]
Q#1069	EGY34058	specific	223215	9	430	0	523.683	COG0137	ArgG	-	cl00292	Argininosuccinate synthase	[Amino acid transport and metabolism]
Q#502	EGY33891	non-specific	223217	10	53	4.28343e-20	76.9608	COG0139	HisI1	C	cl00344	Phosphoribosyl-AMP cyclohydrolase	[Amino acid transport and metabolism]
Q#503	EGY33892	non-specific	223217	2	32	3.6235e-07	41.5224	COG0139	HisI1	N	cl00344	Phosphoribosyl-AMP cyclohydrolase	[Amino acid transport and metabolism]
Q#427	EGY34524	specific	223237	1	268	5.47183e-119	344.203	COG0159	TrpA	-	cl21457	Tryptophan synthase alpha chain	[Amino acid transport and metabolism]
Q#1841	EGY33083	multi-dom	223243	1	457	0	693.612	COG0165	ArgH	-	-	Argininosuccinate lyase	[Amino acid transport and metabolism]
Q#976	EGY35240	multi-dom	223247	1	266	6.53943e-91	272.99	COG0169	AroE	-	-	Shikimate 5-dehydrogenase	[Amino acid transport and metabolism]
Q#1024	EGY34013	multi-dom	223247	1	68	1.18406e-19	78.8492	COG0169	AroE	N	-	Shikimate 5-dehydrogenase	[Amino acid transport and metabolism]
Q#1025	EGY34014	multi-dom	223247	1	188	6.05968e-70	216.751	COG0169	AroE	C	-	Shikimate 5-dehydrogenase	[Amino acid transport and metabolism]
Q#1292	EGY34722	multi-dom	223252	3	469	0	587.684	COG0174	GlnA	-	-	Glutamine synthetase	[Amino acid transport and metabolism]
Q#494	EGY33883	multi-dom	223319	17	65	2.11959e-12	58.0698	COG0241	HisB1	N	-	Histidinol phosphatase or a related phosphatase	[Amino acid transport and metabolism]
Q#515	EGY33904	multi-dom	223331	1	274	7.51333e-151	425.534	COG0253	DapF	-	-	Diaminopimelate epimerase	[Amino acid transport and metabolism]
Q#1029	EGY34018	multi-dom	223338	1	496	0	610.794	COG0260	PepB	-	-	Leucyl aminopeptidase	[Amino acid transport and metabolism]
Q#1675	EGY35158	multi-dom	223338	43	432	9.82595e-160	462.877	COG0260	PepB	-	-	Leucyl aminopeptidase	[Amino acid transport and metabolism]
Q#875	EGY34631	multi-dom	223341	205	305	9.91015e-05	42.1987	COG0263	ProB	NC	-	Glutamate 5-kinase	[Amino acid transport and metabolism]
Q#1797	EGY33039	multi-dom	223341	6	368	0	546.81	COG0263	ProB	-	-	Glutamate 5-kinase	[Amino acid transport and metabolism]
Q#273	EGY34370	multi-dom	223364	96	353	9.00327e-70	222.59	COG0287	TyrA	-	-	Prephenate dehydrogenase	[Amino acid transport and metabolism]
Q#584	EGY34887	multi-dom	223366	1	267	2.74416e-141	400.875	COG0289	DapB	-	-	Dihydrodipicolinate reductase	[Amino acid transport and metabolism]
Q#363	EGY34460	multi-dom	223385	3	863	0	793.604	COG0308	PepN	-	-	Aminopeptidase N	[Amino acid transport and metabolism]
Q#1840	EGY33082	multi-dom	223411	22	449	0	578.424	COG0334	GdhA	-	-	Glutamate dehydrogenase/leucine dehydrogenase	[Amino acid transport and metabolism]
Q#1179	EGY35387	specific	223414	1	361	0	573.763	COG0337	AroB	-	cl02872	3-dehydroquinate synthetase	[Amino acid transport and metabolism]
Q#2021	EGY33263	multi-dom	223422	6	268	7.33083e-108	316.059	COG0345	ProC	-	-	Pyrroline-5-carboxylate reductase	[Amino acid transport and metabolism]
Q#1067	EGY34056	specific	223482	46	589	0	723.636	COG0405	Ggt	-	cl19223	Gamma-glutamyltranspeptidase	[Amino acid transport and metabolism]
Q#552	EGY34855	non-specific	223498	220	416	6.94731e-29	114.392	COG0421	SpeE	C	cl17173	Spermidine synthase	[Amino acid transport and metabolism]
Q#364	EGY34461	multi-dom	223513	7	331	4.58369e-18	83.8636	COG0436	AspB	C	-	Aspartate/methionine/tyrosine aminotransferase	[Amino acid transport and metabolism]
Q#821	EGY32698	multi-dom	223513	78	288	1.51074e-17	81.9376	COG0436	AspB	N	-	Aspartate/methionine/tyrosine aminotransferase	[Amino acid transport and metabolism]
Q#1940	EGY33182	multi-dom	223513	8	402	9.72989e-136	397.031	COG0436	AspB	-	-	Aspartate/methionine/tyrosine aminotransferase	[Amino acid transport and metabolism]
Q#2037	EGY32521	multi-dom	223513	2	113	1.81469e-05	41.1065	COG0436	AspB	C	-	Aspartate/methionine/tyrosine aminotransferase	[Amino acid transport and metabolism]
Q#1281	EGY34711	multi-dom	223536	481	815	8.96855e-109	338.786	COG0460	ThrA	-	-	Homoserine dehydrogenase	[Amino acid transport and metabolism]
Q#1278	EGY34708	multi-dom	223572	1	423	5.92152e-137	401.698	COG0498	ThrC	-	-	Threonine synthase	[Amino acid transport and metabolism]
Q#269	EGY34366	non-specific	223583	111	165	0.00150282	37.6382	COG0509	GcvH	NC	cl11404	Glycine cleavage system H protein (lipoate-binding)	[Amino acid transport and metabolism]
Q#112	EGY34209	multi-dom	223594	1	397	2.8941e-146	424.418	COG0520	CsdA	-	-	Selenocysteine lyase/Cysteine desulfurase	[Amino acid transport and metabolism]
Q#1264	EGY33453	multi-dom	223594	156	420	1.19864e-05	46.1523	COG0520	CsdA	N	-	Selenocysteine lyase/Cysteine desulfurase	[Amino acid transport and metabolism]
Q#1687	EGY35170	multi-dom	223594	2	379	1.32419e-68	224.5	COG0520	CsdA	-	-	Selenocysteine lyase/Cysteine desulfurase	[Amino acid transport and metabolism]
Q#990	EGY35254	multi-dom	223601	83	223	1.15875e-10	59.2056	COG0527	LysC	NC	-	Aspartokinase	[Amino acid transport and metabolism]
Q#1281	EGY34711	multi-dom	223601	1	460	1.06595e-163	485.622	COG0527	LysC	-	-	Aspartokinase	[Amino acid transport and metabolism]
Q#404	EGY34501	multi-dom	223621	1	157	7.31782e-73	224.768	COG0547	TrpD	C	-	Anthranilate phosphoribosyltransferase	[Amino acid transport and metabolism]
Q#405	EGY34502	multi-dom	223621	1	170	1.99827e-64	203.197	COG0547	TrpD	N	-	Anthranilate phosphoribosyltransferase	[Amino acid transport and metabolism]
Q#1797	EGY33039	non-specific	223622	5	255	1.44051e-09	56.8221	COG0548	ArgB	-	cl00452	Acetylglutamate kinase	[Amino acid transport and metabolism]
Q#875	EGY34631	specific	223623	1	300	2.63525e-169	475.597	COG0549	ArcC	-	cl00452	Carbamate kinase	[Amino acid transport and metabolism]
Q#507	EGY33896	non-specific	223634	195	263	3.61936e-09	54.2174	COG0560	SerB	N	cl21460	Phosphoserine phosphatase	[Amino acid transport and metabolism]
Q#804	EGY32681	specific	223634	115	320	2.62338e-77	237.958	COG0560	SerB	-	cl21460	Phosphoserine phosphatase	[Amino acid transport and metabolism]
Q#1618	EGY34977	non-specific	223634	1	182	1.77539e-12	62.3066	COG0560	SerB	-	cl21460	Phosphoserine phosphatase	[Amino acid transport and metabolism]
Q#1739	EGY32981	non-specific	223634	195	249	6.39276e-08	50.7506	COG0560	SerB	N	cl21460	Phosphoserine phosphatase	[Amino acid transport and metabolism]
Q#1775	EGY33017	non-specific	223634	197	268	5.9208e-12	61.9214	COG0560	SerB	N	cl21460	Phosphoserine phosphatase	[Amino acid transport and metabolism]
Q#1706	EGY35189	specific	223664	6	492	7.51918e-130	389.353	COG0591	PutP	-	cl00456	Na+/proline symporter	[Amino acid transport and metabolism]
Q#153	EGY34250	specific	223693	424	755	7.17759e-168	489.878	COG0620	MetE	-	cl00464	Methionine synthase II (cobalamin-independent)	[Amino acid transport and metabolism]
Q#153	EGY34250	non-specific	223693	114	331	3.19139e-09	58.0695	COG0620	MetE	N	cl00464	Methionine synthase II (cobalamin-independent)	[Amino acid transport and metabolism]
Q#18	EGY33477	multi-dom	223697	1	284	1.95294e-10	61.3318	COG0624	ArgE	C	-	Acetylornithine deacetylase/Succinyl-diaminopimelate desuccinylase or related deacylase	[Amino acid transport and metabolism]
Q#1241	EGY33533	multi-dom	223697	31	413	1.35321e-09	58.2502	COG0624	ArgE	-	-	Acetylornithine deacetylase/Succinyl-diaminopimelate desuccinylase or related deacylase	[Amino acid transport and metabolism]
Q#1454	EGY33795	multi-dom	223697	1	375	5.81616e-114	340.987	COG0624	ArgE	-	-	Acetylornithine deacetylase/Succinyl-diaminopimelate desuccinylase or related deacylase	[Amino acid transport and metabolism]
Q#821	EGY32698	specific	223699	1	369	0	520.993	COG0626	MetC	-	cl18945	Cystathionine beta-lyase/cystathionine gamma-synthase	[Amino acid transport and metabolism]
Q#1712	EGY35195	specific	223699	1	396	4.51252e-169	481.702	COG0626	MetC	-	cl18945	Cystathionine beta-lyase/cystathionine gamma-synthase	[Amino acid transport and metabolism]
Q#736	EGY33360	multi-dom	223737	32	395	1.91903e-92	286.796	COG0665	DadA	-	-	Glycine/D-amino acid oxidase (deaminating)	[Amino acid transport and metabolism]
Q#914	EGY32318	multi-dom	223737	261	645	4.08053e-37	142.346	COG0665	DadA	-	-	Glycine/D-amino acid oxidase (deaminating)	[Amino acid transport and metabolism]
Q#1026	EGY34015	specific	223757	7	292	4.58108e-111	325.859	COG0685	MetF	-	cl00246	5,10-methylenetetrahydrofolate reductase	[Amino acid transport and metabolism]
Q#13	EGY33862	non-specific	223759	1	368	1.09829e-14	73.6273	COG0687	PotD	-	cl21456	Spermidine/putrescine-binding periplasmic protein	[Amino acid transport and metabolism]
Q#773	EGY33397	specific	223759	1	347	3.09224e-120	354.438	COG0687	PotD	-	cl21456	Spermidine/putrescine-binding periplasmic protein	[Amino acid transport and metabolism]
Q#1237	EGY33529	specific	223759	29	393	3.08046e-116	345.963	COG0687	PotD	-	cl21456	Spermidine/putrescine-binding periplasmic protein	[Amino acid transport and metabolism]
Q#50	EGY34147	multi-dom	223775	5	38	0.000990219	36.8032	COG0703	AroK	C	-	Shikimate kinase	[Amino acid transport and metabolism]
Q#1180	EGY35388	multi-dom	223775	4	173	4.20571e-79	235.181	COG0703	AroK	-	-	Shikimate kinase	[Amino acid transport and metabolism]
Q#1317	EGY34747	multi-dom	223775	81	162	0.000711884	38.344	COG0703	AroK	N	-	Shikimate kinase	[Amino acid transport and metabolism]
Q#242	EGY34339	multi-dom	223781	18	351	0	517.299	COG0709	SelD	-	-	Selenophosphate synthase	[Amino acid transport and metabolism]
Q#572	EGY34875	specific	223794	9	356	0	631.565	COG0722	AroG1	-	cl17225	3-deoxy-D-arabino-heptulosonate 7-phosphate (DAHP) synthase	[Amino acid transport and metabolism]
Q#1514	EGY32632	multi-dom	223818	4	514	3.95741e-91	291.85	COG0747	DdpA	-	-	ABC-type transport system, periplasmic component	[Amino acid transport and metabolism]
Q#1566	EGY33694	specific	223825	233	620	4.83963e-115	351.665	COG0754	Gsp	-	cl17448	Glutathionylspermidine synthase	[Amino acid transport and metabolism]
Q#1870	EGY33112	specific	223828	6	149	1.25021e-77	229.794	COG0757	AroQ	-	cl00505	3-dehydroquinate dehydratase	[Amino acid transport and metabolism]
Q#738	EGY33362	multi-dom	223836	23	237	1.67686e-79	240.869	COG0765	HisM	-	-	ABC-type amino acid transport system, permease component	[Amino acid transport and metabolism]
Q#680	EGY32443	specific	223857	3	397	1.45777e-159	458.248	COG0786	GltS	-	cl19414	Na+/glutamate symporter	[Amino acid transport and metabolism]
Q#9	EGY33303	multi-dom	223884	1	386	1.62358e-77	248.335	COG0814	SdaC	-	-	Amino acid permease	[Amino acid transport and metabolism]
Q#1509	EGY32627	multi-dom	223884	1	409	3.83911e-101	309.582	COG0814	SdaC	-	-	Amino acid permease	[Amino acid transport and metabolism]
Q#1933	EGY33175	multi-dom	223884	7	413	3.3675e-105	319.982	COG0814	SdaC	-	-	Amino acid permease	[Amino acid transport and metabolism]
Q#2013	EGY33255	multi-dom	223884	1	399	4.08323e-71	231.386	COG0814	SdaC	-	-	Amino acid permease	[Amino acid transport and metabolism]
Q#2115	EGY32854	multi-dom	223884	1	399	1.29207e-76	245.639	COG0814	SdaC	-	-	Amino acid permease	[Amino acid transport and metabolism]
Q#619	EGY32382	multi-dom	223958	1	472	0	888.951	COG1027	AspA	-	-	Aspartate ammonia-lyase	[Amino acid transport and metabolism]
Q#755	EGY33379	multi-dom	223975	75	263	6.81631e-97	284.975	COG1045	CysE	-	-	Serine acetyltransferase	[Amino acid transport and metabolism]
Q#112	EGY34209	non-specific	224029	22	399	2.51298e-54	185.838	COG1104	NifS	-	cl18945	Cysteine sulfinate desulfinase/cysteine desulfurase or related enzyme	[Amino acid transport and metabolism]
Q#1687	EGY35170	specific	224029	3	388	0	637.677	COG1104	NifS	-	cl18945	Cysteine sulfinate desulfinase/cysteine desulfurase or related enzyme	[Amino acid transport and metabolism]
Q#1272	EGY32744	specific	224039	68	499	1.66129e-136	404.309	COG1114	BrnQ	-	cl00547	Branched-chain amino acid permeases	[Amino acid transport and metabolism]
Q#1883	EGY33125	specific	224040	1	447	0	552.567	COG1115	AlsT	-	cl00548	Na+/alanine symporter	[Amino acid transport and metabolism]
Q#739	EGY33363	multi-dom	224051	1	242	1.27202e-145	410.361	COG1126	GlnQ	-	-	ABC-type polar amino acid transport system, ATPase component	[Amino acid transport and metabolism]
Q#1284	EGY34714	multi-dom	224051	7	236	7.27417e-74	228.546	COG1126	GlnQ	-	-	ABC-type polar amino acid transport system, ATPase component	[Amino acid transport and metabolism]
Q#1548	EGY32666	multi-dom	224058	1	343	0	526.047	COG1135	AbcC	-	-	ABC-type methionine transport system, ATPase component	[Amino acid transport and metabolism]
Q#426	EGY34523	multi-dom	224092	41	379	1.88273e-14	72.6332	COG1171	IlvA	-	-	Threonine dehydratase	[Amino acid transport and metabolism]
Q#963	EGY33981	multi-dom	224092	13	222	1.98479e-05	43.7432	COG1171	IlvA	N	-	Threonine dehydratase	[Amino acid transport and metabolism]
Q#1614	EGY34973	multi-dom	224092	2	246	1.12069e-118	345.354	COG1171	IlvA	-	-	Threonine dehydratase	[Amino acid transport and metabolism]
Q#1615	EGY34974	multi-dom	224092	6	56	5.24928e-13	65.3144	COG1171	IlvA	N	-	Threonine dehydratase	[Amino acid transport and metabolism]
Q#1286	EGY34716	specific	224095	11	201	4.92701e-64	209.366	COG1174	OpuBB	-	cl00427	ABC-type proline/glycine betaine transport system, permease component	[Amino acid transport and metabolism]
Q#245	EGY34342	specific	224097	1	286	7.71437e-42	146.987	COG1176	PotB	-	cl00427	ABC-type spermidine/putrescine transport system, permease component I	[Amino acid transport and metabolism]
Q#246	EGY34343	non-specific	224097	24	267	7.68903e-25	100.378	COG1176	PotB	-	cl00427	ABC-type spermidine/putrescine transport system, permease component I	[Amino acid transport and metabolism]
Q#482	EGY34579	non-specific	224097	9	284	5.57008e-25	104.23	COG1176	PotB	-	cl00427	ABC-type spermidine/putrescine transport system, permease component I	[Amino acid transport and metabolism]
Q#482	EGY34579	non-specific	224097	294	558	7.72278e-22	94.9855	COG1176	PotB	-	cl00427	ABC-type spermidine/putrescine transport system, permease component I	[Amino acid transport and metabolism]
Q#600	EGY34903	non-specific	224097	116	386	2.29752e-21	94.2151	COG1176	PotB	-	cl00427	ABC-type spermidine/putrescine transport system, permease component I	[Amino acid transport and metabolism]
Q#1239	EGY33531	specific	224097	3	236	1.21226e-82	250.991	COG1176	PotB	-	cl00427	ABC-type spermidine/putrescine transport system, permease component I	[Amino acid transport and metabolism]
Q#1693	EGY35176	non-specific	224097	130	390	2.49408e-25	106.156	COG1176	PotB	-	cl00427	ABC-type spermidine/putrescine transport system, permease component I	[Amino acid transport and metabolism]
Q#245	EGY34342	multi-dom	224098	1	286	5.9941e-19	83.0045	COG1177	PotC	-	-	ABC-type spermidine/putrescine transport system, permease component II	[Amino acid transport and metabolism]
Q#246	EGY34343	multi-dom	224098	10	272	6.01715e-57	185.853	COG1177	PotC	-	-	ABC-type spermidine/putrescine transport system, permease component II	[Amino acid transport and metabolism]
Q#1238	EGY33530	multi-dom	224098	3	253	5.48752e-81	246.714	COG1177	PotC	-	-	ABC-type spermidine/putrescine transport system, permease component II	[Amino acid transport and metabolism]
Q#1370	EGY33607	non-specific	224168	69	127	7.76075e-07	44.6156	COG1247	YncA	N	cl17182	L-amino acid N-acyltransferase YncA	[Amino acid transport and metabolism]
Q#583	EGY34886	specific	224199	1	202	1.17565e-35	125.814	COG1280	RhtB	-	cl00565	Threonine/homoserine/homoserine lactone efflux protein	[Amino acid transport and metabolism]
Q#156	EGY34253	specific	224215	7	240	9.42716e-64	200.984	COG1296	AzlC	-	cl00570	Predicted branched-chain amino acid permease (azaleucine resistance)	[Amino acid transport and metabolism]
Q#364	EGY34461	specific	224365	1	396	0	698.614	COG1448	TyrB	-	cl18945	Aspartate/tyrosine/aromatic aminotransferase	[Amino acid transport and metabolism]
Q#1776	EGY33018	multi-dom	224423	3	114	6.18944e-08	54.0726	COG1506	DAP2	N	-	Dipeptidyl aminopeptidase/acylaminoacyl peptidase	[Amino acid transport and metabolism]
Q#2016	EGY33258	multi-dom	224426	1	339	8.6684e-168	475.236	COG1509	EpmB	-	-	L-lysine 2,3-aminomutase (EF-P beta-lysylation pathway)	[Amino acid transport and metabolism]
Q#273	EGY34370	specific	224521	1	94	3.88998e-28	106.272	COG1605	PheA	-	cl00693	Chorismate mutase	[Amino acid transport and metabolism]
Q#1457	EGY33798	specific	224521	1	97	3.86149e-24	95.1011	COG1605	PheA	-	cl00693	Chorismate mutase	[Amino acid transport and metabolism]
Q#157	EGY34254	specific	224601	2	108	6.53582e-34	115.111	COG1687	AzlD	-	cl00735	Branched-chain amino acid transport protein AzlD	[Amino acid transport and metabolism]
Q#1932	EGY33174	multi-dom	224674	169	450	3.33846e-126	369.629	COG1760	SdaA	-	-	L-serine deaminase	[Amino acid transport and metabolism]
Q#1778	EGY33020	specific	224790	1	230	1.1516e-53	174.052	COG1878	COG1878	-	cl00814	Kynurenine formamidase	[Amino acid transport and metabolism]
Q#738	EGY33362	non-specific	224922	27	186	0.00723627	35.2342	COG2011	MetP	C	cl00427	ABC-type methionine transport system, permease component	[Amino acid transport and metabolism]
Q#834	EGY32711	non-specific	224922	115	235	0.0057317	36.0046	COG2011	MetP	C	cl00427	ABC-type methionine transport system, permease component	[Amino acid transport and metabolism]
Q#835	EGY32712	non-specific	224922	77	242	0.00374249	36.775	COG2011	MetP	C	cl00427	ABC-type methionine transport system, permease component	[Amino acid transport and metabolism]
Q#1547	EGY32665	specific	224922	4	225	7.25475e-82	246.324	COG2011	MetP	-	cl00427	ABC-type methionine transport system, permease component	[Amino acid transport and metabolism]
Q#281	EGY34378	multi-dom	224932	1	334	2.55396e-169	479.135	COG2021	MET2	-	-	Homoserine acetyltransferase	[Amino acid transport and metabolism]
Q#850	EGY32727	multi-dom	224967	3	450	0	606.23	COG2056	YuiF	-	-	Predicted histidine transporter YuiF, NhaC family	[Amino acid transport and metabolism]
Q#2154	EGY35088	specific	225006	1	204	2.80839e-48	158.509	COG2095	MarC	-	cl00919	Small neutral amino acid transporter SnatA, MarC family	[Amino acid transport and metabolism]
Q#277	EGY34374	multi-dom	225082	1	273	1.19433e-124	358.927	COG2171	DapD	-	-	Tetrahydrodipicolinate N-succinyltransferase	[Amino acid transport and metabolism]
Q#18	EGY33477	specific	225106	7	486	1.11439e-129	385.513	COG2195	PepD2	-	cl14876	Di- or tripeptidase	[Amino acid transport and metabolism]
Q#1241	EGY33533	specific	225106	5	413	4.13891e-153	442.522	COG2195	PepD2	-	cl14876	Di- or tripeptidase	[Amino acid transport and metabolism]
Q#870	EGY34626	specific	225304	1	330	0	644.486	COG2502	AsnA	-	cl00268	Asparagine synthetase A	[Amino acid transport and metabolism]
Q#962	EGY33980	specific	225528	3	244	6.45782e-95	282.693	COG2981	CysZ	-	cl01126	Uncharacterized protein involved in cysteine biosynthesis	[Amino acid transport and metabolism]
Q#2014	EGY33256	multi-dom	225576	1	458	0	760.459	COG3033	TnaA	-	-	Tryptophanase	[Amino acid transport and metabolism]
Q#760	EGY33384	non-specific	225617	8	67	0.00592852	38.1658	COG3075	GlpB	C	cl21454	Anaerobic glycerol-3-phosphate dehydrogenase	[Amino acid transport and metabolism]
Q#1977	EGY33219	non-specific	225617	5	39	0.00132603	39.3214	COG3075	GlpB	C	cl21454	Anaerobic glycerol-3-phosphate dehydrogenase	[Amino acid transport and metabolism]
Q#1283	EGY34713	multi-dom	226143	101	231	0.000376703	39.699	COG3616	Dsd1	NC	-	D-serine deaminase, pyridoxal phosphate-dependent	[Amino acid transport and metabolism]
Q#244	EGY34341	multi-dom	226361	1	353	1.39598e-142	411.289	COG3842	PotA	-	-	ABC-type Fe3+/spermidine/putrescine transport systems, ATPase components	[Amino acid transport and metabolism]
Q#481	EGY34578	multi-dom	226361	1	345	3.27962e-134	390.103	COG3842	PotA	-	-	ABC-type Fe3+/spermidine/putrescine transport systems, ATPase components	[Amino acid transport and metabolism]
Q#483	EGY34580	multi-dom	226361	1	325	1.49183e-134	390.488	COG3842	PotA	-	-	ABC-type Fe3+/spermidine/putrescine transport systems, ATPase components	[Amino acid transport and metabolism]
Q#601	EGY34904	multi-dom	226361	1	328	5.59933e-145	416.681	COG3842	PotA	-	-	ABC-type Fe3+/spermidine/putrescine transport systems, ATPase components	[Amino acid transport and metabolism]
Q#638	EGY32401	multi-dom	226361	3	350	7.26028e-123	360.827	COG3842	PotA	-	-	ABC-type Fe3+/spermidine/putrescine transport systems, ATPase components	[Amino acid transport and metabolism]
Q#1240	EGY33532	multi-dom	226361	6	360	3.01241e-166	472.15	COG3842	PotA	-	-	ABC-type Fe3+/spermidine/putrescine transport systems, ATPase components	[Amino acid transport and metabolism]
Q#1692	EGY35175	multi-dom	226361	1	345	8.8752e-161	457.127	COG3842	PotA	-	-	ABC-type Fe3+/spermidine/putrescine transport systems, ATPase components	[Amino acid transport and metabolism]
Q#1475	EGY33816	multi-dom	226634	2	221	8.17984e-87	259.096	COG4160	ArtM	-	-	ABC-type arginine/histidine transport system, permease component	[Amino acid transport and metabolism]
Q#1478	EGY33819	multi-dom	226635	1	235	4.4814e-151	423.477	COG4161	ArtP	-	-	ABC-type arginine transport system, ATPase component	[Amino acid transport and metabolism]
Q#101	EGY34198	multi-dom	226636	1	57	0.00172191	33.9185	COG4166	OppA	C	-	ABC-type oligopeptide transport system, periplasmic component	[Amino acid transport and metabolism]
Q#540	EGY34843	multi-dom	226636	3	560	1.97984e-98	312.418	COG4166	OppA	-	-	ABC-type oligopeptide transport system, periplasmic component	[Amino acid transport and metabolism]
Q#562	EGY34865	multi-dom	226636	37	511	9.42714e-95	300.862	COG4166	OppA	-	-	ABC-type oligopeptide transport system, periplasmic component	[Amino acid transport and metabolism]
Q#836	EGY32713	multi-dom	226636	1	540	1.68886e-169	495.002	COG4166	OppA	-	-	ABC-type oligopeptide transport system, periplasmic component	[Amino acid transport and metabolism]
Q#1454	EGY33795	non-specific	226650	2	198	6.23553e-09	55.9508	COG4187	RocB	C	cl14876	Arginine utilization protein RocB	[Amino acid transport and metabolism]
Q#1476	EGY33817	multi-dom	226670	1	218	2.10943e-97	286.081	COG4215	ArtQ	-	-	ABC-type arginine transport system, permease component	[Amino acid transport and metabolism]
Q#1392	EGY33629	multi-dom	226683	8	442	6.31214e-45	167.576	COG4230	PutA2	C	-	Delta 1-pyrroline-5-carboxylate dehydrogenase	[Amino acid transport and metabolism]
Q#832	EGY32709	multi-dom	226967	8	317	6.36609e-139	397.738	COG4608	AppF	-	-	ABC-type oligopeptide transport system, ATPase component	[Amino acid transport and metabolism]
Q#119	EGY34216	non-specific	227254	347	393	0.00322983	37.1552	COG4917	EutP	C	cl21455	Ethanolamine utilization protein EutP, contains a P-loop NTPase domain	[Amino acid transport and metabolism]
Q#1263	EGY33452	non-specific	227254	7	164	9.5377e-07	47.5556	COG4917	EutP	-	cl21455	Ethanolamine utilization protein EutP, contains a P-loop NTPase domain	[Amino acid transport and metabolism]
Q#2060	EGY32805	specific	227325	33	366	9.86869e-75	241.303	COG4992	ArgD	-	cl18945	Acetylornithine/succinyldiaminopimelate/putrescine aminotransferase	[Amino acid transport and metabolism]
Q#327	EGY34424	multi-dom	223769	1	271	1.60173e-07	50.2501	COG0697	RhaT	-	-	Permease of the drug/metabolite transporter (DMT) superfamily	[Carbohydrate transport and metabolism, Amino acid transport and metabolism, General function prediction only]
Q#839	EGY32716	multi-dom	223769	1	299	4.16002e-13	67.1989	COG0697	RhaT	-	-	Permease of the drug/metabolite transporter (DMT) superfamily	[Carbohydrate transport and metabolism, Amino acid transport and metabolism, General function prediction only]
Q#840	EGY32717	multi-dom	223769	1	300	7.28451e-11	60.6505	COG0697	RhaT	-	-	Permease of the drug/metabolite transporter (DMT) superfamily	[Carbohydrate transport and metabolism, Amino acid transport and metabolism, General function prediction only]
Q#1323	EGY34753	multi-dom	223769	4	138	1.54815e-05	41.7757	COG0697	RhaT	N	-	Permease of the drug/metabolite transporter (DMT) superfamily	[Carbohydrate transport and metabolism, Amino acid transport and metabolism, General function prediction only]
Q#2007	EGY33249	multi-dom	223769	3	281	2.40275e-18	81.4513	COG0697	RhaT	-	-	Permease of the drug/metabolite transporter (DMT) superfamily	[Carbohydrate transport and metabolism, Amino acid transport and metabolism, General function prediction only]
Q#1955	EGY33197	multi-dom	223553	14	334	2.23113e-08	53.9259	COG0477	ProP	-	-	MFS family permease	[Carbohydrate transport and metabolism, Amino acid transport and metabolism, Inorganic ion transport and metabolism, General function prediction only]
Q#2138	EGY32877	multi-dom	223553	14	330	2.24845e-09	57.7779	COG0477	ProP	-	-	MFS family permease	[Carbohydrate transport and metabolism, Amino acid transport and metabolism, Inorganic ion transport and metabolism, General function prediction only]
Q#1596	EGY33724	multi-dom	223798	30	250	4.02537e-14	71.5732	COG0726	CDA1	C	-	Peptidoglycan/xylan/chitin deacetylase, PgdA/CDA1 family	[Carbohydrate transport and metabolism, Cell wall/membrane/envelope biogenesis]
Q#398	EGY34495	specific	223865	3	203	4.76614e-99	292.633	COG0794	GutQ	-	cl00389	D-arabinose 5-phosphate isomerase GutQ	[Carbohydrate transport and metabolism, Cell wall/membrane/envelope biogenesis]
Q#698	EGY32461	non-specific	223865	337	420	3.0333e-05	44.1792	COG0794	GutQ	N	cl00389	D-arabinose 5-phosphate isomerase GutQ	[Carbohydrate transport and metabolism, Cell wall/membrane/envelope biogenesis]
Q#734	EGY33358	non-specific	223865	36	195	3.89467e-11	59.9724	COG0794	GutQ	C	cl00389	D-arabinose 5-phosphate isomerase GutQ	[Carbohydrate transport and metabolism, Cell wall/membrane/envelope biogenesis]
Q#1094	EGY34083	non-specific	223865	101	234	1.3196e-11	61.128	COG0794	GutQ	C	cl00389	D-arabinose 5-phosphate isomerase GutQ	[Carbohydrate transport and metabolism, Cell wall/membrane/envelope biogenesis]
Q#1388	EGY33625	non-specific	223865	116	266	8.754e-13	64.2096	COG0794	GutQ	-	cl00389	D-arabinose 5-phosphate isomerase GutQ	[Carbohydrate transport and metabolism, Cell wall/membrane/envelope biogenesis]
Q#72	EGY34169	multi-dom	224057	4	248	4.35545e-104	310.702	COG1134	TagH	-	-	ABC-type polysaccharide/polyol phosphate transport system, ATPase component	[Carbohydrate transport and metabolism, Cell wall/membrane/envelope biogenesis]
Q#71	EGY34168	specific	224596	1	264	8.82874e-44	150.809	COG1682	TagG	-	cl21474	ABC-type polysaccharide/polyol phosphate export permease	[Carbohydrate transport and metabolism, Cell wall/membrane/envelope biogenesis]
Q#59	EGY34156	non-specific	227372	21	318	5.14764e-63	205.03	COG5039	EpsI	-	cl22864	Exopolysaccharide biosynthesis protein EpsI, predicted pyruvyl transferase	[Carbohydrate transport and metabolism, Cell wall/membrane/envelope biogenesis]
Q#799	EGY32768	multi-dom	223710	1	220	2.2846e-43	147.19	COG0637	YcjU	-	-	Beta-phosphoglucomutase or related phosphatase, HAD superfamily	[Carbohydrate transport and metabolism, General function prediction only]
Q#1579	EGY33707	multi-dom	223710	9	193	4.58311e-47	156.05	COG0637	YcjU	-	-	Beta-phosphoglucomutase or related phosphatase, HAD superfamily	[Carbohydrate transport and metabolism, General function prediction only]
Q#51	EGY34148	multi-dom	225330	1	449	2.32917e-109	333.05	COG2610	GntT	-	-	H+/gluconate symporter or related permease	[Carbohydrate transport and metabolism, General function prediction only]
Q#1780	EGY33022	multi-dom	225330	5	450	1.14142e-100	310.709	COG2610	GntT	-	-	H+/gluconate symporter or related permease	[Carbohydrate transport and metabolism, General function prediction only]
Q#236	EGY34333	specific	224406	1	238	5.72649e-107	311.142	COG1489	SfsA	-	cl00647	DNA-binding protein, stimulates sugar fermentation	[Carbohydrate transport and metabolism, Signal transduction mechanisms]
Q#310	EGY34407	specific	224676	6	147	2.58248e-22	87.3806	COG1762	PtsN	-	cl00163	Phosphotransferase system mannitol/fructose-specific IIA domain (Ntr-type)	[Carbohydrate transport and metabolism, Signal transduction mechanisms]
Q#1316	EGY34746	specific	224676	2	147	2.70461e-33	117.041	COG1762	PtsN	-	cl00163	Phosphotransferase system mannitol/fructose-specific IIA domain (Ntr-type)	[Carbohydrate transport and metabolism, Signal transduction mechanisms]
Q#2109	EGY32848	specific	224676	2	152	9.84994e-31	109.722	COG1762	PtsN	-	cl00163	Phosphotransferase system mannitol/fructose-specific IIA domain (Ntr-type)	[Carbohydrate transport and metabolism, Signal transduction mechanisms]
Q#1763	EGY33005	non-specific	226438	1	94	1.44486e-23	95.6461	COG3925	FruA	-	cl10014	N-terminal domain of the phosphotransferase system fructose-specific component IIB	[Carbohydrate transport and metabolism, Signal transduction mechanisms]
Q#124	EGY34221	multi-dom	223100	1	256	2.04505e-58	198.204	COG0021	TktA	C	-	Transketolase	[Carbohydrate transport and metabolism]
Q#2160	EGY35094	multi-dom	223100	1	665	0	1209.74	COG0021	TktA	-	-	Transketolase	[Carbohydrate transport and metabolism]
Q#1619	EGY34978	specific	223114	1	222	5.38576e-122	348.391	COG0036	Rpe	-	cl21457	Pentose-5-phosphate-3-epimerase	[Carbohydrate transport and metabolism]
Q#1324	EGY34754	multi-dom	223135	2	332	0	535.213	COG0057	GapA	-	-	Glyceraldehyde-3-phosphate dehydrogenase/erythrose-4-phosphate dehydrogenase	[Carbohydrate transport and metabolism]
Q#265	EGY34362	multi-dom	223136	25	793	0	877.786	COG0058	GlgP	-	-	Glucan phosphorylase	[Carbohydrate transport and metabolism]
Q#342	EGY34439	multi-dom	223136	13	814	0	945.581	COG0058	GlgP	-	-	Glucan phosphorylase	[Carbohydrate transport and metabolism]
Q#931	EGY33949	specific	223198	1	218	1.13329e-110	319.51	COG0120	RpiA	-	cl00339	Ribose 5-phosphate isomerase	[Carbohydrate transport and metabolism]
Q#1745	EGY32987	specific	223204	1	386	0	572.567	COG0126	Pgk	-	cl00198	3-phosphoglycerate kinase	[Carbohydrate transport and metabolism]
Q#662	EGY32425	multi-dom	223226	1	435	0	688.591	COG0148	Eno	-	-	Enolase	[Carbohydrate transport and metabolism]
Q#1865	EGY33107	specific	223227	3	255	8.3254e-116	335.364	COG0149	TpiA	-	cl21457	Triosephosphate isomerase	[Carbohydrate transport and metabolism]
Q#2062	EGY35120	multi-dom	223231	1	384	2.12889e-177	502.22	COG0153	GalK	-	-	Galactokinase	[Carbohydrate transport and metabolism]
Q#812	EGY32689	specific	223236	1	333	0	542.675	COG0158	Fbp	-	cl00289	Fructose-1,6-bisphosphatase	[Carbohydrate transport and metabolism]
Q#576	EGY34879	multi-dom	223244	49	539	0	631.656	COG0166	Pgi	-	-	Glucose-6-phosphate isomerase	[Carbohydrate transport and metabolism]
Q#2161	EGY35095	specific	223254	5	314	4.27472e-95	284.16	COG0176	TalA	-	cl21457	Transaldolase	[Carbohydrate transport and metabolism]
Q#1744	EGY32986	specific	223269	17	357	7.90923e-129	373.815	COG0191	Fba	-	cl21457	Fructose/tagatose bisphosphate aldolase	[Carbohydrate transport and metabolism]
Q#1998	EGY33240	specific	223283	1	320	3.75125e-161	456.69	COG0205	PfkA	-	cl00204	6-phosphofructokinase	[Carbohydrate transport and metabolism]
Q#1782	EGY33024	specific	223313	1	210	1.81231e-63	198.316	COG0235	AraD	-	cl00214	Ribulose-5-phosphate 4-epimerase/Fuculose-1-phosphate aldolase	[Carbohydrate transport and metabolism]
Q#2114	EGY32853	specific	223313	1	231	5.64944e-91	269.578	COG0235	AraD	-	cl00214	Ribulose-5-phosphate 4-epimerase/Fuculose-1-phosphate aldolase	[Carbohydrate transport and metabolism]
Q#1382	EGY33619	multi-dom	223324	2	382	8.10841e-122	363.608	COG0246	MtlD	-	-	Mannitol-1-phosphate/altronate dehydrogenases	[Carbohydrate transport and metabolism]
Q#2108	EGY32847	specific	223347	1	224	3.38805e-90	267.193	COG0269	SgbH	-	cl21457	3-keto-L-gulonate-6-phosphate decarboxylase	[Carbohydrate transport and metabolism]
Q#292	EGY34389	specific	223356	1	179	3.77736e-68	208.323	COG0279	GmhA	-	cl00389	Phosphoheptose isomerase	[Carbohydrate transport and metabolism]
Q#1479	EGY33820	specific	223356	2	179	4.18476e-102	294.607	COG0279	GmhA	-	cl00389	Phosphoheptose isomerase	[Carbohydrate transport and metabolism]
Q#338	EGY34435	multi-dom	223373	100	727	0	934.423	COG0296	GlgB	-	-	1,4-alpha-glucan branching enzyme	[Carbohydrate transport and metabolism]
Q#341	EGY34438	multi-dom	223374	1	479	0	592.328	COG0297	GlgA	-	-	Glycogen synthase	[Carbohydrate transport and metabolism]
Q#1098	EGY35306	multi-dom	223439	27	499	0	900.447	COG0362	Gnd	-	-	6-phosphogluconate dehydrogenase	[Carbohydrate transport and metabolism]
Q#1096	EGY34085	specific	223440	1	249	6.80048e-93	276.447	COG0363	NagB	-	cl00339	6-phosphogluconolactonase/Glucosamine-6-phosphate isomerase/deaminase	[Carbohydrate transport and metabolism]
Q#1103	EGY35311	specific	223440	1	232	1.39216e-71	220.593	COG0363	NagB	-	cl00339	6-phosphogluconolactonase/Glucosamine-6-phosphate isomerase/deaminase	[Carbohydrate transport and metabolism]
Q#1104	EGY35312	multi-dom	223441	3	486	0	774.116	COG0364	Zwf	-	-	Glucose-6-phosphate 1-dehydrogenase	[Carbohydrate transport and metabolism]
Q#602	EGY34905	multi-dom	223443	189	679	9.81856e-54	193.283	COG0366	AmyA	-	-	Glycosidase	[Carbohydrate transport and metabolism]
Q#15	EGY33864	multi-dom	223472	8	295	7.96801e-60	194.316	COG0395	UgpE	-	-	ABC-type glycerol-3-phosphate transport system, permease component	[Carbohydrate transport and metabolism]
Q#234	EGY34331	non-specific	223483	65	102	0.0013539	35.9244	COG0406	PhoE	NC	cl11399	Broad specificity phosphatase PhoE	[Carbohydrate transport and metabolism]
Q#323	EGY34420	specific	223483	5	68	8.20853e-19	75.9851	COG0406	PhoE	C	cl11399	Broad specificity phosphatase PhoE	[Carbohydrate transport and metabolism]
Q#722	EGY32485	specific	223483	1	181	3.64402e-41	140.313	COG0406	PhoE	-	cl11399	Broad specificity phosphatase PhoE	[Carbohydrate transport and metabolism]
Q#340	EGY34437	multi-dom	223525	14	428	0	571.508	COG0448	GlgC	-	-	ADP-glucose pyrophosphorylase	[Carbohydrate transport and metabolism]
Q#430	EGY34527	multi-dom	223545	1	467	0	637.287	COG0469	PykF	-	-	Pyruvate kinase	[Carbohydrate transport and metabolism]
Q#458	EGY34555	multi-dom	223547	20	484	6.1135e-74	242.613	COG0471	CitT	-	-	Di- and tricarboxylate transporter	[Carbohydrate transport and metabolism]
Q#723	EGY32486	multi-dom	223547	50	489	1.79982e-44	162.876	COG0471	CitT	-	-	Di- and tricarboxylate transporter	[Carbohydrate transport and metabolism]
Q#1005	EGY35269	multi-dom	223547	36	622	2.4674e-58	204.093	COG0471	CitT	-	-	Di- and tricarboxylate transporter	[Carbohydrate transport and metabolism]
Q#1035	EGY34024	multi-dom	223547	2	447	3.92391e-82	263.028	COG0471	CitT	-	-	Di- and tricarboxylate transporter	[Carbohydrate transport and metabolism]
Q#2066	EGY35124	multi-dom	223547	5	474	3.23503e-76	248.391	COG0471	CitT	-	-	Di- and tricarboxylate transporter	[Carbohydrate transport and metabolism]
Q#1390	EGY33627	specific	223559	14	260	9.24108e-79	241.095	COG0483	SuhB	-	cl00289	Archaeal fructose-1,6-bisphosphatase or related enzyme of inositol monophosphatase family	[Carbohydrate transport and metabolism]
Q#1690	EGY35173	specific	223559	1	255	1.41908e-112	327.379	COG0483	SuhB	-	cl00289	Archaeal fructose-1,6-bisphosphatase or related enzyme of inositol monophosphatase family	[Carbohydrate transport and metabolism]
Q#110	EGY34207	specific	223598	12	309	1.85112e-33	127.998	COG0524	RbsK	-	cl00192	Sugar or nucleoside kinase, ribokinase family	[Carbohydrate transport and metabolism]
Q#232	EGY34329	non-specific	223598	1	44	1.98474e-06	41.7132	COG0524	RbsK	N	cl00192	Sugar or nucleoside kinase, ribokinase family	[Carbohydrate transport and metabolism]
Q#939	EGY33957	specific	223598	3	314	1.79272e-64	207.734	COG0524	RbsK	-	cl00192	Sugar or nucleoside kinase, ribokinase family	[Carbohydrate transport and metabolism]
Q#1387	EGY33624	specific	223598	9	336	1.47259e-72	238.165	COG0524	RbsK	-	cl00192	Sugar or nucleoside kinase, ribokinase family	[Carbohydrate transport and metabolism]
Q#1537	EGY32655	specific	223598	127	270	4.71843e-13	68.2919	COG0524	RbsK	N	cl00192	Sugar or nucleoside kinase, ribokinase family	[Carbohydrate transport and metabolism]
Q#1851	EGY33093	specific	223598	4	309	1.4536e-73	231.231	COG0524	RbsK	-	cl00192	Sugar or nucleoside kinase, ribokinase family	[Carbohydrate transport and metabolism]
Q#1517	EGY32635	non-specific	223661	2	70	3.8864e-40	132.784	COG0588	GpmA	N	cl11399	Phosphoglycerate mutase (BPG-dependent)	[Carbohydrate transport and metabolism]
Q#1518	EGY32636	specific	223661	1	148	1.73645e-93	273.382	COG0588	GpmA	C	cl11399	Phosphoglycerate mutase (BPG-dependent)	[Carbohydrate transport and metabolism]
Q#1573	EGY33701	non-specific	223734	5	103	6.03657e-09	48.9218	COG0662	ManC	-	cl21464	Mannose-6-phosphate isomerase, cupin superfamily	[Carbohydrate transport and metabolism]
Q#1634	EGY34993	non-specific	223734	27	75	0.00133161	36.9806	COG0662	ManC	NC	cl21464	Mannose-6-phosphate isomerase, cupin superfamily	[Carbohydrate transport and metabolism]
Q#93	EGY34190	specific	223748	8	272	3.24956e-109	320.493	COG0676	YeaD	-	cl14648	D-hexose-6-phosphate mutarotase	[Carbohydrate transport and metabolism]
Q#348	EGY34445	multi-dom	223809	56	343	0.00758146	38.8353	COG0738	FucP	-	-	Fucose permease	[Carbohydrate transport and metabolism]
Q#936	EGY33954	specific	223871	3	209	1.41197e-84	252.14	COG0800	Eda	-	cl21457	2-keto-3-deoxy-6-phosphogluconate aldolase	[Carbohydrate transport and metabolism]
Q#1445	EGY33786	multi-dom	223992	3	334	2.88815e-102	307.207	COG1064	AdhP	-	-	D-arabinose 1-dehydrogenase, Zn-dependent alcohol dehydrogenase family	[Carbohydrate transport and metabolism]
Q#438	EGY34535	multi-dom	223996	7	512	1.14109e-143	426.023	COG1070	XylB	-	-	Sugar (pentulose or hexulose) kinase	[Carbohydrate transport and metabolism]
Q#726	EGY32489	multi-dom	223996	1	484	6.38963e-136	404.452	COG1070	XylB	-	-	Sugar (pentulose or hexulose) kinase	[Carbohydrate transport and metabolism]
Q#2031	EGY32515	multi-dom	223996	1	482	1.91144e-141	419.089	COG1070	XylB	-	-	Sugar (pentulose or hexulose) kinase	[Carbohydrate transport and metabolism]
Q#558	EGY34861	multi-dom	224006	1	573	0	893.099	COG1080	PtsA	-	-	Phosphoenolpyruvate-protein kinase (PTS system EI component in bacteria)	[Carbohydrate transport and metabolism]
Q#1385	EGY33622	multi-dom	224007	8	294	1.20049e-47	162.323	COG1082	YcjR	-	-	Sugar phosphate isomerase/epimerase	[Carbohydrate transport and metabolism]
Q#906	EGY32310	multi-dom	224010	10	345	2.83842e-168	475.755	COG1085	GalT	-	-	Galactose-1-phosphate uridylyltransferase	[Carbohydrate transport and metabolism]
Q#1764	EGY33006	specific	224030	3	312	1.19431e-123	359.608	COG1105	FruK	-	cl00192	Fructose-1-phosphate kinase or kinase (PfkB)	[Carbohydrate transport and metabolism]
Q#668	EGY32431	multi-dom	224034	1	453	4.38611e-139	410.198	COG1109	ManB	-	-	Phosphomannomutase	[Carbohydrate transport and metabolism]
Q#1519	EGY32637	multi-dom	224034	45	544	4.0432e-118	359.737	COG1109	ManB	-	-	Phosphomannomutase	[Carbohydrate transport and metabolism]
Q#1732	EGY35215	multi-dom	224034	1	444	9.51842e-156	452.57	COG1109	ManB	-	-	Phosphomannomutase	[Carbohydrate transport and metabolism]
Q#436	EGY34533	multi-dom	224053	4	502	0	602.193	COG1129	MglA	-	-	ABC-type sugar transport system, ATPase component	[Carbohydrate transport and metabolism]
Q#728	EGY32491	multi-dom	224053	1	494	0	692.33	COG1129	MglA	-	-	ABC-type sugar transport system, ATPase component	[Carbohydrate transport and metabolism]
Q#910	EGY32314	multi-dom	224053	12	509	0	738.169	COG1129	MglA	-	-	ABC-type sugar transport system, ATPase component	[Carbohydrate transport and metabolism]
Q#1396	EGY33633	multi-dom	224053	5	501	0	686.552	COG1129	MglA	-	-	ABC-type sugar transport system, ATPase component	[Carbohydrate transport and metabolism]
Q#2034	EGY32518	multi-dom	224053	1	92	7.41993e-37	129.938	COG1129	MglA	C	-	ABC-type sugar transport system, ATPase component	[Carbohydrate transport and metabolism]
Q#434	EGY34531	specific	224093	1	308	8.25631e-65	209.699	COG1172	AraH	-	cl00454	Ribose/xylose/arabinose/galactoside ABC-type transport system, permease component	[Carbohydrate transport and metabolism]
Q#435	EGY34532	specific	224093	33	312	1.06026e-68	220.099	COG1172	AraH	-	cl00454	Ribose/xylose/arabinose/galactoside ABC-type transport system, permease component	[Carbohydrate transport and metabolism]
Q#727	EGY32490	specific	224093	1	328	1.52255e-84	260.93	COG1172	AraH	-	cl00454	Ribose/xylose/arabinose/galactoside ABC-type transport system, permease component	[Carbohydrate transport and metabolism]
Q#1397	EGY33634	specific	224093	28	316	6.11308e-81	250.53	COG1172	AraH	-	cl00454	Ribose/xylose/arabinose/galactoside ABC-type transport system, permease component	[Carbohydrate transport and metabolism]
Q#14	EGY33863	specific	224096	248	512	1.64902e-60	202.838	COG1175	UgpA	-	cl00427	ABC-type sugar transport system, permease component	[Carbohydrate transport and metabolism]
Q#1082	EGY34071	specific	224096	27	263	8.02827e-05	43.3655	COG1175	UgpA	-	cl00427	ABC-type sugar transport system, permease component	[Carbohydrate transport and metabolism]
Q#64	EGY34161	multi-dom	224137	4	269	8.40882e-11	59.8051	COG1216	GT2	-	-	Glycosyltransferase, GT2 family	[Carbohydrate transport and metabolism]
Q#73	EGY34170	multi-dom	224137	807	1079	1.98373e-23	102.562	COG1216	GT2	-	-	Glycosyltransferase, GT2 family	[Carbohydrate transport and metabolism]
Q#205	EGY34302	specific	224183	1	413	1.35818e-95	297.23	COG1263	PtsG1	-	cl21492	Phosphotransferase system IIC components, glucose/maltose/N-acetylglucosamine-specific	[Carbohydrate transport and metabolism]
Q#1088	EGY34077	specific	224183	1	399	6.341e-94	292.608	COG1263	PtsG1	-	cl21492	Phosphotransferase system IIC components, glucose/maltose/N-acetylglucosamine-specific	[Carbohydrate transport and metabolism]
Q#205	EGY34302	specific	224184	419	497	4.84112e-21	87.7357	COG1264	PtsG2	-	cl00164	Phosphotransferase system IIB components	[Carbohydrate transport and metabolism]
Q#1088	EGY34077	specific	224184	411	485	2.71551e-20	85.4245	COG1264	PtsG2	-	cl00164	Phosphotransferase system IIB components	[Carbohydrate transport and metabolism]
Q#1373	EGY33610	specific	224184	5	44	1.54641e-08	45.749	COG1264	PtsG2	C	cl00164	Phosphotransferase system IIB components	[Carbohydrate transport and metabolism]
Q#1381	EGY33618	non-specific	224218	57	336	0.0010316	40.2626	COG1299	FrwC	-	cl21492	Phosphotransferase system, fructose-specific IIC component	[Carbohydrate transport and metabolism]
Q#1763	EGY33005	specific	224218	222	554	1.21991e-121	364.601	COG1299	FrwC	-	cl21492	Phosphotransferase system, fructose-specific IIC component	[Carbohydrate transport and metabolism]
Q#945	EGY33963	multi-dom	224231	1	233	2.7507e-117	342.039	COG1312	UxuA	C	-	D-mannonate dehydratase	[Carbohydrate transport and metabolism]
Q#946	EGY33964	multi-dom	224231	1	141	2.17733e-65	204.908	COG1312	UxuA	N	-	D-mannonate dehydratase	[Carbohydrate transport and metabolism]
Q#1763	EGY33005	specific	224362	101	219	7.65361e-47	160.924	COG1445	FrwB	-	cl10014	Phosphotransferase system fructose-specific component IIB	[Carbohydrate transport and metabolism]
Q#2000	EGY33242	specific	224389	1	316	1.03544e-110	332.056	COG1472	BglX	C	cl07971	Periplasmic beta-glucosidase and related glycosidases	[Carbohydrate transport and metabolism]
Q#203	EGY34300	multi-dom	224399	2	388	3.93497e-74	236.042	COG1482	ManA	-	-	Mannose-6-phosphate isomerase, class I	[Carbohydrate transport and metabolism]
Q#757	EGY33381	specific	224411	1	301	2.91121e-169	476.03	COG1494	GlpX	-	cl00289	Fructose-1,6-bisphosphatase/sedoheptulose 1,7-bisphosphatase or related protein	[Carbohydrate transport and metabolism]
Q#943	EGY33961	multi-dom	224418	30	778	0	669.108	COG1501	YicI	-	-	Alpha-glucosidase, glycosyl hydrolase family GH31	[Carbohydrate transport and metabolism]
Q#339	EGY34436	multi-dom	224440	6	668	0	808.877	COG1523	PulA	-	-	Pullulanase/glycogen debranching enzyme	[Carbohydrate transport and metabolism]
Q#850	EGY32727	non-specific	224509	191	399	0.00481429	37.524	COG1593	DctQ	N	cl21473	TRAP-type C4-dicarboxylate transport system, large permease component	[Carbohydrate transport and metabolism]
Q#876	EGY34632	non-specific	224509	160	442	0.00328808	38.2944	COG1593	DctQ	-	cl21473	TRAP-type C4-dicarboxylate transport system, large permease component	[Carbohydrate transport and metabolism]
Q#942	EGY33960	specific	224509	52	430	1.72154e-122	363.788	COG1593	DctQ	-	cl21473	TRAP-type C4-dicarboxylate transport system, large permease component	[Carbohydrate transport and metabolism]
Q#1090	EGY34079	specific	224509	237	614	1.97513e-144	426.576	COG1593	DctQ	-	cl21473	TRAP-type C4-dicarboxylate transport system, large permease component	[Carbohydrate transport and metabolism]
Q#230	EGY34327	multi-dom	224536	5	63	1.65218e-08	49.2964	COG1621	SacC	N	-	Sucrose-6-phosphate hydrolase SacC, GH32 family	[Carbohydrate transport and metabolism]
Q#940	EGY33958	specific	224553	23	345	8.91917e-112	331.535	COG1638	DctP	-	cl21456	TRAP-type C4-dicarboxylate transport system, periplasmic component	[Carbohydrate transport and metabolism]
Q#1091	EGY34080	specific	224553	1	328	2.84273e-130	377.759	COG1638	DctP	-	cl21456	TRAP-type C4-dicarboxylate transport system, periplasmic component	[Carbohydrate transport and metabolism]
Q#264	EGY34361	specific	224555	104	663	0	531.935	COG1640	MalQ	-	cl00711	4-alpha-glucanotransferase	[Carbohydrate transport and metabolism]
Q#247	EGY34344	multi-dom	224567	1	323	1.37262e-06	48.4562	COG1653	UgpB	C	-	ABC-type glycerol-3-phosphate transport system, periplasmic component	[Carbohydrate transport and metabolism]
Q#480	EGY34577	multi-dom	224567	1	293	1.3455e-06	48.071	COG1653	UgpB	-	-	ABC-type glycerol-3-phosphate transport system, periplasmic component	[Carbohydrate transport and metabolism]
Q#599	EGY34902	multi-dom	224567	1	304	0.000802618	39.5966	COG1653	UgpB	-	-	ABC-type glycerol-3-phosphate transport system, periplasmic component	[Carbohydrate transport and metabolism]
Q#640	EGY32403	multi-dom	224567	8	280	2.59234e-06	47.3006	COG1653	UgpB	C	-	ABC-type glycerol-3-phosphate transport system, periplasmic component	[Carbohydrate transport and metabolism]
Q#773	EGY33397	multi-dom	224567	1	297	4.11639e-07	49.997	COG1653	UgpB	-	-	ABC-type glycerol-3-phosphate transport system, periplasmic component	[Carbohydrate transport and metabolism]
Q#1081	EGY34070	multi-dom	224567	1	152	0.000820451	39.5966	COG1653	UgpB	C	-	ABC-type glycerol-3-phosphate transport system, periplasmic component	[Carbohydrate transport and metabolism]
Q#1237	EGY33529	multi-dom	224567	28	348	0.000103511	42.6782	COG1653	UgpB	-	-	ABC-type glycerol-3-phosphate transport system, periplasmic component	[Carbohydrate transport and metabolism]
Q#1695	EGY35178	multi-dom	224567	1	291	2.98393e-06	47.3006	COG1653	UgpB	C	-	ABC-type glycerol-3-phosphate transport system, periplasmic component	[Carbohydrate transport and metabolism]
Q#130	EGY34227	specific	224716	8	149	2.56438e-91	264.186	COG1803	MgsA	-	cl00245	Methylglyoxal synthase	[Carbohydrate transport and metabolism]
Q#1097	EGY34086	multi-dom	224733	2	381	6.06226e-172	487.929	COG1820	NagA	-	-	N-acetylglucosamine-6-phosphate deacetylase	[Carbohydrate transport and metabolism]
Q#432	EGY34529	specific	224743	28	281	1.17024e-104	308.804	COG1830	FbaB	-	cl21457	Fructose-bisphosphate aldolase class Ia, DhnA family	[Carbohydrate transport and metabolism]
Q#1853	EGY33095	non-specific	224782	1	78	1.08043e-29	103.551	COG1869	RbsD	N	cl00809	D-ribose pyranose/furanose isomerase RbsD	[Carbohydrate transport and metabolism]
Q#1854	EGY33096	non-specific	224782	3	36	6.03635e-13	57.7121	COG1869	RbsD	C	cl00809	D-ribose pyranose/furanose isomerase RbsD	[Carbohydrate transport and metabolism]
Q#433	EGY34530	multi-dom	224791	7	298	6.13011e-55	184.209	COG1879	RbsB	-	-	ABC-type sugar transport system, periplasmic component, contains N-terminal xre family HTH domain	[Carbohydrate transport and metabolism]
Q#729	EGY32492	multi-dom	224791	27	296	1.23919e-69	221.574	COG1879	RbsB	-	-	ABC-type sugar transport system, periplasmic component, contains N-terminal xre family HTH domain	[Carbohydrate transport and metabolism]
Q#909	EGY32313	multi-dom	224791	1	330	6.85449e-57	188.832	COG1879	RbsB	-	-	ABC-type sugar transport system, periplasmic component, contains N-terminal xre family HTH domain	[Carbohydrate transport and metabolism]
Q#1394	EGY33631	multi-dom	224791	1	312	3.3333e-58	191.913	COG1879	RbsB	-	-	ABC-type sugar transport system, periplasmic component, contains N-terminal xre family HTH domain	[Carbohydrate transport and metabolism]
Q#1395	EGY33632	multi-dom	224791	6	310	6.85564e-60	196.15	COG1879	RbsB	-	-	ABC-type sugar transport system, periplasmic component, contains N-terminal xre family HTH domain	[Carbohydrate transport and metabolism]
Q#937	EGY33955	specific	224816	3	466	0	677.53	COG1904	UxaC	-	cl00829	Glucuronate isomerase	[Carbohydrate transport and metabolism]
Q#2063	EGY35121	specific	224928	8	343	8.06717e-92	279.28	COG2017	GalM	-	cl14648	Galactose mutarotase or related enzyme	[Carbohydrate transport and metabolism]
Q#2032	EGY32516	specific	225026	1	437	0	835.147	COG2115	XylA	-	cl21457	Xylose isomerase	[Carbohydrate transport and metabolism]
Q#13	EGY33862	multi-dom	225093	4	395	4.67683e-138	403.669	COG2182	MalE	-	-	Maltose-binding periplasmic protein MalE	[Carbohydrate transport and metabolism]
Q#559	EGY34862	specific	225101	17	166	2.04093e-68	207.064	COG2190	NagE	-	cl00162	Phosphotransferase system IIA component	[Carbohydrate transport and metabolism]
Q#1381	EGY33618	multi-dom	225123	1	460	0	767.26	COG2213	MtlA	-	-	Phosphotransferase system, mannitol-specific IIBC component	[Carbohydrate transport and metabolism]
Q#2111	EGY32850	specific	225130	33	336	1.29129e-53	179.638	COG2220	UlaG	-	cl00446	L-ascorbate metabolism protein UlaG, beta-lactamase superfamily	[Carbohydrate transport and metabolism]
Q#1335	EGY33572	multi-dom	225180	1	443	0	519.905	COG2271	UhpC	-	-	Sugar phosphate permease	[Carbohydrate transport and metabolism]
Q#1391	EGY33628	multi-dom	225180	21	436	1.30935e-97	302.652	COG2271	UhpC	-	-	Sugar phosphate permease	[Carbohydrate transport and metabolism]
Q#1593	EGY33721	multi-dom	225180	4	436	7.23192e-177	505.652	COG2271	UhpC	-	-	Sugar phosphate permease	[Carbohydrate transport and metabolism]
Q#1646	EGY35005	multi-dom	225180	8	484	0	583.077	COG2271	UhpC	-	-	Sugar phosphate permease	[Carbohydrate transport and metabolism]
Q#2069	EGY35127	specific	225184	1	285	1.05044e-119	347.365	COG2301	CitE	-	cl21481	Citrate lyase beta subunit	[Carbohydrate transport and metabolism]
Q#751	EGY33375	specific	225332	4	440	0	557.674	COG2704	DcuA	-	cl01040	Anaerobic C4-dicarboxylate transporter	[Carbohydrate transport and metabolism]
Q#1234	EGY33526	specific	225332	12	553	0	536.103	COG2704	DcuA	-	cl01040	Anaerobic C4-dicarboxylate transporter	[Carbohydrate transport and metabolism]
Q#1892	EGY33134	specific	225345	1	155	1.84587e-58	181.293	COG2731	EbgC	-	cl01047	Beta-galactosidase, beta subunit	[Carbohydrate transport and metabolism]
Q#1699	EGY35182	multi-dom	225371	13	391	1.99527e-88	275.647	COG2814	AraJ	-	-	Predicted arabinose efflux permease, MFS family	[Carbohydrate transport and metabolism]
Q#1812	EGY33054	multi-dom	225371	14	297	2.92756e-07	49.9197	COG2814	AraJ	N	-	Predicted arabinose efflux permease, MFS family	[Carbohydrate transport and metabolism]
Q#1521	EGY32639	specific	225416	24	248	7.41176e-100	295.031	COG2861	YibQ	-	cl17042	Uncharacterized conserved protein YibQ, putative polysaccharide deacetylase 2 family	[Carbohydrate transport and metabolism]
Q#783	EGY33407	specific	225446	2	142	4.70199e-52	170.528	COG2893	ManX	-	cl00025	Phosphotransferase system, mannose/fructose-specific component IIA	[Carbohydrate transport and metabolism]
Q#1501	EGY32619	specific	225446	1	133	5.81751e-38	133.549	COG2893	ManX	-	cl00025	Phosphotransferase system, mannose/fructose-specific component IIA	[Carbohydrate transport and metabolism]
Q#301	EGY34398	specific	225547	1	287	2.01425e-142	405.629	COG3001	FN3K	-	cl21453	Fructosamine-3-kinase	[Carbohydrate transport and metabolism]
Q#1092	EGY34081	specific	225555	6	231	7.61282e-132	373.929	COG3010	NanE	-	cl21457	Putative N-acetylmannosamine-6-phosphate epimerase	[Carbohydrate transport and metabolism]
Q#1736	EGY35219	non-specific	225555	233	363	2.24151e-06	47.2798	COG3010	NanE	N	cl21457	Putative N-acetylmannosamine-6-phosphate epimerase	[Carbohydrate transport and metabolism]
Q#123	EGY34220	specific	225579	1	445	8.82724e-150	437.895	COG3037	UlaA	-	cl04451	Ascorbate-specific PTS system EIIC-type component UlaA	[Carbohydrate transport and metabolism]
Q#2110	EGY32849	specific	225579	1	451	9.97515e-180	519.943	COG3037	UlaA	-	cl04451	Ascorbate-specific PTS system EIIC-type component UlaA	[Carbohydrate transport and metabolism]
Q#941	EGY33959	specific	225632	1	157	7.58705e-34	118.974	COG3090	DctM	-	cl01181	TRAP-type C4-dicarboxylate transport system, small permease component	[Carbohydrate transport and metabolism]
Q#1090	EGY34079	specific	225632	1	169	6.04438e-35	130.145	COG3090	DctM	-	cl01181	TRAP-type C4-dicarboxylate transport system, small permease component	[Carbohydrate transport and metabolism]
Q#50	EGY34147	specific	225804	10	169	4.76836e-91	265.322	COG3265	GntK	-	cl17190	Gluconate kinase	[Carbohydrate transport and metabolism]
Q#1788	EGY33030	non-specific	225804	124	203	0.00349155	35.7435	COG3265	GntK	N	cl17190	Gluconate kinase	[Carbohydrate transport and metabolism]
Q#1782	EGY33024	multi-dom	225884	71	196	0.00437652	36.2121	COG3347	RhaD	NC	-	Rhamnose utilisation protein RhaD, predicted bifunctional aldolase and dehydrogenase	[Carbohydrate transport and metabolism]
Q#122	EGY34219	non-specific	225948	1	83	3.07523e-16	68.0339	COG3414	SgaB	-	cl10014	Phosphotransferase system, galactitol-specific IIB component	[Carbohydrate transport and metabolism]
Q#311	EGY34408	non-specific	225948	2	92	2.55786e-19	76.1231	COG3414	SgaB	-	cl10014	Phosphotransferase system, galactitol-specific IIB component	[Carbohydrate transport and metabolism]
Q#2110	EGY32849	specific	225948	495	586	1.56352e-27	106.554	COG3414	SgaB	-	cl10014	Phosphotransferase system, galactitol-specific IIB component	[Carbohydrate transport and metabolism]
Q#783	EGY33407	specific	225976	170	328	1.56164e-75	231.749	COG3444	AgaB	-	cl00021	Phosphotransferase system, mannose/fructose/N-acetylgalactosamine-specific component IIB	[Carbohydrate transport and metabolism]
Q#1501	EGY32619	specific	225976	163	315	1.64408e-63	200.548	COG3444	AgaB	-	cl00021	Phosphotransferase system, mannose/fructose/N-acetylgalactosamine-specific component IIB	[Carbohydrate transport and metabolism]
Q#1677	EGY35160	multi-dom	226056	40	257	3.08891e-25	106.47	COG3525	Chb	NC	-	N-acetyl-beta-hexosaminidase	[Carbohydrate transport and metabolism]
Q#1781	EGY33023	multi-dom	226149	1	258	4.13687e-157	440.558	COG3622	Hyi	-	-	Hydroxypyruvate isomerase	[Carbohydrate transport and metabolism]
Q#2113	EGY32852	multi-dom	226150	1	286	0	564.32	COG3623	SgaU	-	-	L-ribulose-5-phosphate 3-epimerase UlaE	[Carbohydrate transport and metabolism]
Q#308	EGY34405	non-specific	226209	1	314	4.91502e-116	340.219	COG3684	LacD	-	cl21457	Tagatose-1,6-bisphosphate aldolase	[Carbohydrate transport and metabolism]
Q#782	EGY33406	specific	226238	2	266	4.6811e-89	267.941	COG3715	ManY	-	cl01506	Phosphotransferase system, mannose/fructose/N-acetylgalactosamine-specific component IIC	[Carbohydrate transport and metabolism]
Q#1500	EGY32618	specific	226238	1	261	3.30691e-86	260.237	COG3715	ManY	-	cl01506	Phosphotransferase system, mannose/fructose/N-acetylgalactosamine-specific component IIC	[Carbohydrate transport and metabolism]
Q#781	EGY33405	specific	226239	2	277	2.19905e-138	393.912	COG3716	ManZ	-	cl01507	Phosphotransferase system, mannose/fructose/N-acetylgalactosamine-specific component IID	[Carbohydrate transport and metabolism]
Q#1499	EGY32617	specific	226239	1	277	1.70663e-125	361.17	COG3716	ManZ	-	cl01507	Phosphotransferase system, mannose/fructose/N-acetylgalactosamine-specific component IID	[Carbohydrate transport and metabolism]
Q#1389	EGY33626	specific	226241	1	271	1.07035e-152	430.235	COG3718	IolB	-	cl01508	5-deoxy-D-glucuronate isomerase	[Carbohydrate transport and metabolism]
Q#1600	EGY33728	non-specific	226292	136	360	2.34527e-09	56.3952	COG3769	YedP	-	cl21460	Predicted mannosyl-3-phosphoglycerate phosphatase, HAD superfamily	[Carbohydrate transport and metabolism]
Q#1775	EGY33017	non-specific	226292	5	75	0.00166321	37.9057	COG3769	YedP	C	cl21460	Predicted mannosyl-3-phosphoglycerate phosphatase, HAD superfamily	[Carbohydrate transport and metabolism]
Q#312	EGY34409	non-specific	226298	1	336	6.10868e-141	409.76	COG3775	SgcC	C	cl04451	Phosphotransferase system, galactitol-specific IIC component	[Carbohydrate transport and metabolism]
Q#313	EGY34410	non-specific	226298	1	101	4.74857e-22	88.8888	COG3775	SgcC	N	cl04451	Phosphotransferase system, galactitol-specific IIC component	[Carbohydrate transport and metabolism]
Q#15	EGY33864	specific	226354	1	296	1.4895e-115	337.299	COG3833	MalG	-	cl00427	ABC-type maltose transport system, permease component	[Carbohydrate transport and metabolism]
Q#558	EGY34861	non-specific	226356	372	509	0.00803475	36.8972	COG3836	HpcH	N	cl21481	2-keto-3-deoxy-L-rhamnonate aldolase RhmA	[Carbohydrate transport and metabolism]
Q#12	EGY33861	multi-dom	226359	1	359	2.84641e-176	496.782	COG3839	MalK	-	-	ABC-type sugar transport system, ATPase component	[Carbohydrate transport and metabolism]
Q#104	EGY34201	non-specific	226386	12	270	7.61125e-26	103.352	COG3868	COG3868	-	cl00997	Predicted glycosyl hydrolase, GH114 family	[Carbohydrate transport and metabolism]
Q#1387	EGY33624	non-specific	226408	340	635	7.9657e-145	425.699	COG3892	IolC	-	cl21457	Myo-inositol catabolism protein IolC	[Carbohydrate transport and metabolism]
Q#125	EGY34222	multi-dom	226467	4	314	1.13742e-137	395.5	COG3958	TktA2	-	-	Transketolase, C-terminal subunit	[Carbohydrate transport and metabolism]
Q#124	EGY34221	specific	226468	1	236	1.42908e-117	340.065	COG3959	TktA1	-	cl01629	Transketolase, N-terminal subunit	[Carbohydrate transport and metabolism]
Q#268	EGY34365	non-specific	226468	73	292	4.82579e-14	71.9664	COG3959	TktA1	-	cl01629	Transketolase, N-terminal subunit	[Carbohydrate transport and metabolism]
Q#316	EGY34413	non-specific	226468	24	284	1.37395e-07	51.5508	COG3959	TktA1	-	cl01629	Transketolase, N-terminal subunit	[Carbohydrate transport and metabolism]
Q#2160	EGY35094	non-specific	226468	6	248	4.7442e-63	211.023	COG3959	TktA1	-	cl01629	Transketolase, N-terminal subunit	[Carbohydrate transport and metabolism]
Q#1386	EGY33623	multi-dom	226471	1	648	0	974.948	COG3962	IolD	-	-	TPP-dependent trihydroxycyclohexane-1,2-dione (THcHDO) dehydratase, myo-inositol metabolism	[Carbohydrate transport and metabolism]
Q#911	EGY32315	specific	226667	1	336	0	525.874	COG4211	MglC	-	cl00454	ABC-type glucose/galactose transport system, permease component	[Carbohydrate transport and metabolism]
Q#2033	EGY32517	multi-dom	226668	1	331	7.15086e-165	466.469	COG4213	XylF	-	-	ABC-type xylose transport system, periplasmic component	[Carbohydrate transport and metabolism]
Q#2036	EGY32520	specific	226669	1	375	2.53133e-149	430.567	COG4214	XylH	-	cl00454	ABC-type xylose transport system, permease component	[Carbohydrate transport and metabolism]
Q#309	EGY34406	non-specific	226939	1	421	0	679.153	COG4573	GatZ	-	cl09211	Tagatose-1,6-bisphosphate aldolase non-catalytic subunit AgaZ/GatZ	[Carbohydrate transport and metabolism]
Q#11	EGY33860	non-specific	226946	1	427	4.03437e-141	413.073	COG4580	LamB	-	cl21487	Maltoporin (phage lambda and maltose receptor)	[Carbohydrate transport and metabolism]
Q#1381	EGY33618	specific	227014	485	626	1.9822e-61	202.134	COG4668	MtlA2	-	cl00163	Mannitol/fructose-specific phosphotransferase system, IIA domain	[Carbohydrate transport and metabolism]
Q#1765	EGY33007	specific	227014	2	143	2.74256e-64	207.527	COG4668	MtlA2	-	cl00163	Mannitol/fructose-specific phosphotransferase system, IIA domain	[Carbohydrate transport and metabolism]
Q#1470	EGY33811	multi-dom	223839	29	584	3.42539e-167	492.693	COG0768	FtsI	-	-	Cell division protein FtsI/penicillin-binding protein 2	[Cell cycle control, cell division, chromosome partitioning, Cell wall/membrane/envelope biogenesis]
Q#1817	EGY33059	multi-dom	223839	16	623	0	560.103	COG0768	FtsI	-	-	Cell division protein FtsI/penicillin-binding protein 2	[Cell cycle control, cell division, chromosome partitioning, Cell wall/membrane/envelope biogenesis]
Q#2008	EGY33250	multi-dom	225043	6	470	2.19645e-93	292.849	COG2132	SufI	-	-	Multicopper oxidase with three cupredoxin domains (includes cell division protein FtsP and spore coat protein CotA)	[Cell cycle control, cell division, chromosome partitioning, Inorganic ion transport and metabolism, Cell wall/membrane/envelope biogenes
Q#1740	EGY32982	specific	223317	1	125	2.59781e-26	96.4827	COG0239	CrcB	-	cl09114	Fluoride ion exporter CrcB/FEX, affects chromosome condensation	[Cell cycle control, cell division, chromosome partitioning, Inorganic ion transport and metabolism]
Q#838	EGY32715	multi-dom	223610	1	359	0	519.419	COG0536	Obg	-	-	GTPase involved in cell partioning and DNA repair	[Cell cycle control, cell division, chromosome partitioning, Replication, recombination and repair]
Q#350	EGY34447	multi-dom	225638	28	1496	0	2507.46	COG3096	MukB	-	-	Chromosome condensin MukBEF, ATPase and DNA-binding subunit MukB	[Cell cycle control, cell division, chromosome partitioning]
Q#1420	EGY33657	multi-dom	223284	1	98	6.33514e-11	56.9101	COG0206	FtsZ	C	-	Cell division GTPase FtsZ	[Cell cycle control, cell division, chromosome partitioning]
Q#1459	EGY33800	multi-dom	223284	28	362	7.09666e-113	337.335	COG0206	FtsZ	-	-	Cell division GTPase FtsZ	[Cell cycle control, cell division, chromosome partitioning]
Q#1418	EGY33655	multi-dom	223296	26	241	4.11081e-06	45.3001	COG0218	EngB	-	-	GTP-binding protein EngB required for normal cell division	[Cell cycle control, cell division, chromosome partitioning]
Q#1540	EGY32658	multi-dom	223296	5	201	1.20212e-106	307.621	COG0218	EngB	-	-	GTP-binding protein EngB required for normal cell division	[Cell cycle control, cell division, chromosome partitioning]
Q#1679	EGY35162	multi-dom	223563	63	339	1.73431e-87	268.131	COG0489	Mrp	-	-	Chromosome partitioning ATPase, Mrp family, contains Fe-S cluster	[Cell cycle control, cell division, chromosome partitioning]
Q#1465	EGY33806	specific	223843	42	385	2.67428e-97	297.991	COG0772	FtsW	-	cl00511	Bacterial cell division protein FtsW, lipid II flippase	[Cell cycle control, cell division, chromosome partitioning]
Q#1818	EGY33060	specific	223843	5	370	1.79025e-112	336.126	COG0772	FtsW	-	cl00511	Bacterial cell division protein FtsW, lipid II flippase	[Cell cycle control, cell division, chromosome partitioning]
Q#1460	EGY33801	multi-dom	223918	6	426	8.84821e-171	488.281	COG0849	FtsA	-	-	Cell division ATPase FtsA	[Cell cycle control, cell division, chromosome partitioning]
Q#1729	EGY35212	multi-dom	223919	6	219	1.7453e-50	165.185	COG0850	MinC	-	-	Septum formation inhibitor MinC	[Cell cycle control, cell division, chromosome partitioning]
Q#1650	EGY35009	multi-dom	224003	7	348	0	509.078	COG1077	MreB	-	-	Actin-like ATPase involved in cell morphogenesis	[Cell cycle control, cell division, chromosome partitioning]
Q#192	EGY34289	multi-dom	224117	30	217	0.000366332	40.468	COG1196	Smc	NC	-	Chromosome segregation ATPase	[Cell cycle control, cell division, chromosome partitioning]
Q#1927	EGY33169	multi-dom	224343	17	319	2.23473e-49	168.795	COG1426	RodZ	-	-	Cytoskeletal protein RodZ, contains Xre-like HTH and DUF4115 domains	[Cell cycle control, cell division, chromosome partitioning]
Q#1530	EGY32648	multi-dom	224392	10	91	2.21284e-05	43.3378	COG1475	Spo0J	C	-	Chromosome segregation protein Spo0J, contains ParB-like nuclease domain	[Cell cycle control, cell division, chromosome partitioning]
Q#1787	EGY33029	specific	224475	16	343	4.45927e-150	429.391	COG1559	YceG	-	cl18961	Cell division protein YceG, involved in septum cleavage	[Cell cycle control, cell division, chromosome partitioning]
Q#1461	EGY33802	multi-dom	224505	1	251	7.29383e-60	192.606	COG1589	FtsQ	-	-	Cell division septal protein FtsQ	[Cell cycle control, cell division, chromosome partitioning]
Q#1230	EGY33522	multi-dom	224588	26	910	0	611.082	COG1674	FtsK	-	-	DNA segregation ATPase FtsK/SpoIIIE and related proteins	[Cell cycle control, cell division, chromosome partitioning]
Q#1651	EGY35010	specific	224705	3	271	1.40187e-92	280.783	COG1792	MreC	-	cl19252	Cell shape-determining protein MreC	[Cell cycle control, cell division, chromosome partitioning]
Q#866	EGY34622	multi-dom	225088	27	69	0.0024126	33.3867	COG2177	FtsX	C	-	Cell division protein FtsX	[Cell cycle control, cell division, chromosome partitioning]
Q#1616	EGY34975	multi-dom	225088	15	309	2.22141e-100	299.56	COG2177	FtsX	-	-	Cell division protein FtsX	[Cell cycle control, cell division, chromosome partitioning]
Q#1617	EGY34976	multi-dom	225438	1	216	2.76476e-131	371.548	COG2884	FtsE	-	-	ABC-type ATPase involved in cell division	[Cell cycle control, cell division, chromosome partitioning]
Q#921	EGY32325	specific	225469	1	177	1.21605e-67	206.778	COG2917	YciB	-	cl01098	Intracellular septation protein A	[Cell cycle control, cell division, chromosome partitioning]
Q#1620	EGY34979	specific	225471	1	90	2.21139e-29	102.805	COG2919	FtsB	-	cl11433	Cell division protein FtsB	[Cell cycle control, cell division, chromosome partitioning]
Q#347	EGY34444	specific	225551	1	440	0	793.297	COG3006	MukF	-	cl11468	Chromosome condensin MukBEF complex, kleisin-like MukF subunit	[Cell cycle control, cell division, chromosome partitioning]
Q#1660	EGY35019	specific	225571	11	101	2.32896e-23	87.7371	COG3027	ZapA	-	cl01146	Cell division protein ZapA, inhibits GTPase activity of FtsZ	[Cell cycle control, cell division, chromosome partitioning]
Q#758	EGY33382	non-specific	225616	1	72	8.76642e-13	58.055	COG3074	ZapB	-	cl11531	Cell division protein ZapB, interacts with FtsZ	[Cell cycle control, cell division, chromosome partitioning]
Q#1207	EGY35415	multi-dom	225629	28	277	1.77778e-43	150.376	COG3087	FtsN	-	-	Cell division protein FtsN	[Cell cycle control, cell division, chromosome partitioning]
Q#349	EGY34446	non-specific	225637	7	233	8.9156e-141	397.687	COG3095	MukE	-	cl11471	Chromosome condensin MukBEF, MukE localization factor	[Cell cycle control, cell division, chromosome partitioning]
Q#961	EGY33979	multi-dom	225657	33	377	2.29328e-81	254.406	COG3115	ZipA	-	-	Cell division protein ZipA, interacts with FtsZ	[Cell cycle control, cell division, chromosome partitioning]
Q#1471	EGY33812	specific	225658	2	105	9.31124e-38	124.443	COG3116	FtsL	-	cl11433	Cell division protein FtsL, interacts with FtsB, FtsL and FtsQ	[Cell cycle control, cell division, chromosome partitioning]
Q#1520	EGY32638	multi-dom	227278	28	419	4.21597e-127	376.755	COG4942	EnvC	-	-	Septal ring factor EnvC, activator of murein hydrolases AmiA and AmiB	[Cell cycle control, cell division, chromosome partitioning]
Q#1889	EGY33131	non-specific	225364	127	397	6.65433e-57	194.02	COG2805	PilT	C	cl21455	Tfp pilus assembly protein PilT, pilus retraction ATPase	[Cell motility, Extracellular structures]
Q#1928	EGY33170	multi-dom	225605	10	183	2.8404e-49	161.824	COG3063	PilF	C	-	Tfp pilus assembly protein PilF	[Cell motility, Extracellular structures]
Q#1184	EGY35392	non-specific	225707	1	172	0.000189287	39.2891	COG3166	PilN	-	cl19830	Tfp pilus assembly protein PilN	[Cell motility, Extracellular structures]
Q#1597	EGY33725	multi-dom	225711	250	434	5.33172e-05	45.2895	COG3170	FimV	N	-	Tfp pilus assembly protein FimV	[Cell motility, Extracellular structures]
Q#289	EGY34386	multi-dom	227303	7	87	0.0066789	35.0953	COG4968	PilE	C	-	Tfp pilus assembly protein PilE	[Cell motility, Extracellular structures]
Q#1890	EGY33132	multi-dom	227304	14	137	2.28571e-30	107.892	COG4969	PilA	-	-	Tfp pilus assembly protein, major pilin PilA	[Cell motility, Extracellular structures]
Q#1185	EGY35393	multi-dom	227306	78	170	6.13806e-05	42.3764	COG4972	PilM	NC	-	Tfp pilus assembly protein, ATPase PilM	[Cell motility, Extracellular structures]
Q#1613	EGY34781	multi-dom	227341	156	285	2.20952e-08	53.6078	COG5008	PilU	NC	-	Tfp pilus assembly protein, ATPase PilU	[Cell motility, Extracellular structures]
Q#1888	EGY33130	multi-dom	224376	4	407	2.61825e-111	334.95	COG1459	PulF	-	-	Type II secretory pathway, component PulF	[Cell motility, Intracellular trafficking, secretion, and vesicular transport, Extracellular structures]
Q#1491	EGY33832	multi-dom	225363	140	349	8.09013e-16	78.141	COG2804	PulE	NC	-	Type II secretory pathway ATPase GspE/PulE or T4P pilus assembly pathway ATPase PilB	[Cell motility, Intracellular trafficking, secretion, and vesicular transport, Extracellular structures]
Q#1889	EGY33131	multi-dom	225363	19	466	0	518.809	COG2804	PulE	-	-	Type II secretory pathway ATPase GspE/PulE or T4P pilus assembly pathway ATPase PilB	[Cell motility, Intracellular trafficking, secretion, and vesicular transport, Extracellular structures]
Q#1887	EGY33129	multi-dom	224900	70	228	1.43161e-11	60.8788	COG1989	PulO	N	-	Prepilin signal peptidase PulO (type II secretory pathway) or related peptidase	[Cell motility, Intracellular trafficking, secretion, and vesicular transport]
Q#912	EGY32316	multi-dom	223716	305	365	0.000122317	43.8583	COG0643	CheA	N	-	Chemotaxis protein histidine kinase CheA	[Cell motility, Signal transduction mechanisms]
Q#1790	EGY33032	specific	223162	1	257	2.75768e-121	349.204	COG0084	TatD	-	cl00281	Tat protein secretion system quality control protein TatD (DNase activity)	[Cell motility]
Q#1828	EGY33070	specific	223162	1	261	8.74722e-92	274.09	COG0084	TatD	-	cl00281	Tat protein secretion system quality control protein TatD (DNase activity)	[Cell motility]
Q#1710	EGY35193	multi-dom	224113	9	84	2.53192e-12	60.6107	COG1192	BcsQ	C	-	Cellulose biosynthesis protein BcsQ	[Cell motility]
Q#2045	EGY34942	multi-dom	224113	1	208	5.8736e-31	114.924	COG1192	BcsQ	-	-	Cellulose biosynthesis protein BcsQ	[Cell motility]
Q#1595	EGY33723	multi-dom	224136	10	404	2.42633e-69	227.513	COG1215	BcsA	-	-	Glycosyltransferase, catalytic subunit of cellulose synthase and poly-beta-1,6-N-acetylglucosamine synthase	[Cell motility]
Q#1228	EGY33520	non-specific	225429	74	128	2.9402e-05	44.2243	COG2874	FlaH	C	cl21455	Archaellum biogenesis protein FlaH, an ATPase	[Cell motility]
Q#2157	EGY35091	non-specific	225429	41	156	0.00557657	36.5203	COG2874	FlaH	C	cl21455	Archaellum biogenesis protein FlaH, an ATPase	[Cell motility]
Q#367	EGY34464	multi-dom	223540	22	343	6.28723e-54	193.887	COG0464	SpoVK	N	-	AAA+-type ATPase, SpoVK/Ycf46/Vps4 family	[Cell wall/membrane/envelope biogenesis, Cell cycle control, cell division, chromosome partitioning, Signal transduction mechanisms]
Q#1027	EGY34016	specific	223866	1	354	8.44242e-87	268.822	COG0795	LptF	-	cl12074	Lipopolysaccharide export LptBFGC system, permease protein LptF	[Cell wall/membrane/envelope biogenesis, Cell motility]
Q#1028	EGY34017	specific	223866	6	354	5.11609e-70	225.68	COG0795	LptF	-	cl12074	Lipopolysaccharide export LptBFGC system, permease protein LptF	[Cell wall/membrane/envelope biogenesis, Cell motility]
Q#332	EGY34429	multi-dom	223914	28	374	4.85623e-44	157.949	COG0845	AcrA	-	-	Multidrug efflux pump subunit AcrA (membrane-fusion protein)	[Cell wall/membrane/envelope biogenesis, Defense mechanisms]
Q#1209	EGY35417	multi-dom	223914	47	316	4.65504e-38	141.386	COG0845	AcrA	-	-	Multidrug efflux pump subunit AcrA (membrane-fusion protein)	[Cell wall/membrane/envelope biogenesis, Defense mechanisms]
Q#1462	EGY33803	multi-dom	224102	6	307	6.34596e-132	380.855	COG1181	DdlA	-	-	D-alanine-D-alanine ligase and related ATP-grasp enzymes	[Cell wall/membrane/envelope biogenesis, General function prediction only]
Q#1917	EGY33159	multi-dom	224102	434	757	1.80891e-59	204.819	COG1181	DdlA	-	-	D-alanine-D-alanine ligase and related ATP-grasp enzymes	[Cell wall/membrane/envelope biogenesis, General function prediction only]
Q#399	EGY34496	specific	224692	5	177	1.04209e-82	244.879	COG1778	KdsC	-	cl21460	3-deoxy-D-manno-octulosonate 8-phosphate phosphatase KdsC and related HAD superfamily phosphatases	[Cell wall/membrane/envelope biogenesis, General function prediction only]
Q#30	EGY33989	specific	223670	1	164	2.09643e-48	156.232	COG0597	LspA	-	cl00458	Lipoprotein signal peptidase	[Cell wall/membrane/envelope biogenesis, Intracellular trafficking, secretion, and vesicular transport]
Q#2052	EGY32797	specific	226001	1	172	2.87202e-106	304.414	COG3470	Tpd	-	cl01377	Uncharacterized protein probably involved in high-affinity Fe2+ transport	[Cell wall/membrane/envelope biogenesis, Lipid transport and metabolism]
Q#998	EGY35262	specific	225381	1	189	4.01053e-27	102.087	COG2825	HlpA	-	cl21485	Periplasmic chaperone for outer membrane proteins, Skp family	[Cell wall/membrane/envelope biogenesis, Posttranslational modification, protein turnover, chaperones]
Q#1945	EGY33187	multi-dom	226971	21	466	0	689.591	COG4623	MltF	-	-	Membrane-bound lytic murein transglycosylase MltF	[Cell wall/membrane/envelope biogenesis, Signal transduction mechanisms]
Q#1001	EGY35265	multi-dom	223973	3	262	2.1423e-152	428.568	COG1043	LpxA	-	-	Acyl-	[Cell wall/membrane/envelope biogenesis]
Q#999	EGY35263	multi-dom	223974	1	339	7.42924e-153	435.959	COG1044	LpxD	-	-	UDP-3-O-	[Cell wall/membrane/envelope biogenesis]
Q#2014	EGY33256	non-specific	223476	81	333	3.42371e-05	44.5436	COG0399	WecE	C	cl18945	dTDP-4-amino-4,6-dideoxygalactose transaminase	[Cell wall/membrane/envelope biogenesis]
Q#73	EGY34170	multi-dom	223515	1114	1429	4.50946e-05	46.0947	COG0438	RfaB	-	-	Glycosyltransferase involved in cell wall bisynthesis	[Cell wall/membrane/envelope biogenesis]
Q#698	EGY32461	multi-dom	223526	1	610	0	935.449	COG0449	GlmS	-	-	Glucosamine 6-phosphate synthetase, contains amidotransferase and phosphosugar isomerase domains	[Cell wall/membrane/envelope biogenesis]
Q#1070	EGY34059	multi-dom	223528	1	266	1.73808e-24	99.6313	COG0451	WcaG	-	-	Nucleoside-diphosphate-sugar epimerase	[Cell wall/membrane/envelope biogenesis]
Q#1569	EGY33697	multi-dom	223528	1	308	2.56938e-63	204.791	COG0451	WcaG	-	-	Nucleoside-diphosphate-sugar epimerase	[Cell wall/membrane/envelope biogenesis]
Q#63	EGY34160	multi-dom	223539	1	112	4.18155e-14	69.7269	COG0463	WcaA	C	-	Glycosyltransferase involved in cell wall bisynthesis	[Cell wall/membrane/envelope biogenesis]
Q#74	EGY34171	multi-dom	223539	1	288	6.29703e-15	72.4233	COG0463	WcaA	-	-	Glycosyltransferase involved in cell wall bisynthesis	[Cell wall/membrane/envelope biogenesis]
Q#184	EGY34281	multi-dom	223539	2	265	1.32654e-17	80.1273	COG0463	WcaA	-	-	Glycosyltransferase involved in cell wall bisynthesis	[Cell wall/membrane/envelope biogenesis]
Q#527	EGY33916	multi-dom	223539	1	231	1.58516e-14	69.7269	COG0463	WcaA	C	-	Glycosyltransferase involved in cell wall bisynthesis	[Cell wall/membrane/envelope biogenesis]
Q#551	EGY34854	multi-dom	223539	9	232	1.20824e-15	74.3493	COG0463	WcaA	C	-	Glycosyltransferase involved in cell wall bisynthesis	[Cell wall/membrane/envelope biogenesis]
Q#1628	EGY34987	multi-dom	223539	1	249	2.56923e-22	92.4537	COG0463	WcaA	-	-	Glycosyltransferase involved in cell wall bisynthesis	[Cell wall/membrane/envelope biogenesis]
Q#1467	EGY33808	specific	223548	39	361	3.71713e-85	263.361	COG0472	Rfe	-	cl10571	UDP-N-acetylmuramyl pentapeptide phosphotransferase/UDP-N-acetylglucosamine-1-phosphate transferase	[Cell wall/membrane/envelope biogenesis]
Q#2061	EGY32806	specific	223548	1	307	4.81489e-56	187.476	COG0472	Rfe	-	cl10571	UDP-N-acetylmuramyl pentapeptide phosphotransferase/UDP-N-acetylglucosamine-1-phosphate transferase	[Cell wall/membrane/envelope biogenesis]
Q#110	EGY34207	non-specific	223688	340	476	3.16041e-20	86.5705	COG0615	TagD	-	cl00015	Glycerol-3-phosphate cytidylyltransferase, cytidylyltransferase family	[Cell wall/membrane/envelope biogenesis]
Q#1858	EGY33100	specific	223754	1	265	5.6139e-95	283.776	COG0682	Lgt	-	cl00478	Prolipoprotein diacylglyceryltransferase	[Cell wall/membrane/envelope biogenesis]
Q#1986	EGY33228	specific	223778	245	543	1.48875e-98	303.603	COG0706	YidC	-	cl00489	Membrane protein insertase Oxa1/YidC/SpoIIIJ, required for the localization of integral membrane proteins	[Cell wall/membrane/envelope biogenesis]
Q#1464	EGY33805	multi-dom	223779	3	354	6.14369e-144	414.801	COG0707	MurG	-	-	UDP-N-acetylglucosamine:LPS N-acetylglucosamine transferase	[Cell wall/membrane/envelope biogenesis]
Q#801	EGY32678	multi-dom	223800	1	515	5.85656e-161	470.612	COG0728	MviN	-	-	Peptidoglycan biosynthesis protein MviN/MurJ, putative lipid II flippase	[Cell wall/membrane/envelope biogenesis]
Q#708	EGY32471	multi-dom	223801	56	619	0	577.791	COG0729	TamA	-	-	Outer membrane translocation and assembly module TamA	[Cell wall/membrane/envelope biogenesis]
Q#1057	EGY34046	multi-dom	223810	291	479	6.91399e-52	179.217	COG0739	NlpD	N	-	Murein DD-endopeptidase MepM and murein hydrolase activator NlpD, contain LysM domain	[Cell wall/membrane/envelope biogenesis]
Q#1627	EGY34986	multi-dom	223810	146	389	5.87929e-49	168.431	COG0739	NlpD	-	-	Murein DD-endopeptidase MepM and murein hydrolase activator NlpD, contain LysM domain	[Cell wall/membrane/envelope biogenesis]
Q#645	EGY32408	multi-dom	223812	49	353	1.24066e-44	156.798	COG0741	MltE	-	-	Soluble lytic murein transglycosylase and related regulatory proteins (some contain LysM/invasin domains)	[Cell wall/membrane/envelope biogenesis]
Q#1426	EGY33767	multi-dom	223812	413	720	2.98657e-29	118.278	COG0741	MltE	-	-	Soluble lytic murein transglycosylase and related regulatory proteins (some contain LysM/invasin domains)	[Cell wall/membrane/envelope biogenesis]
Q#1428	EGY33769	multi-dom	223815	12	250	3.56609e-75	242.648	COG0744	MrcB	C	-	Membrane carboxypeptidase (penicillin-binding protein)	[Cell wall/membrane/envelope biogenesis]
Q#2055	EGY32800	multi-dom	223815	86	772	0	639.019	COG0744	MrcB	-	-	Membrane carboxypeptidase (penicillin-binding protein)	[Cell wall/membrane/envelope biogenesis]
Q#1985	EGY33227	specific	223830	3	78	3.80396e-41	132.062	COG0759	YidD	-	cl00506	Membrane-anchored protein YidD, putatitve component of membrane protein insertase Oxa1/YidC/SpoIIIJ	[Cell wall/membrane/envelope biogenesis]
Q#1003	EGY35267	multi-dom	223834	11	391	0	525.285	COG0763	LpxB	-	-	Lipid A disaccharide synthetase	[Cell wall/membrane/envelope biogenesis]
Q#1212	EGY33504	non-specific	223837	40	413	1.19176e-11	64.831	COG0766	MurA	-	cl00288	UDP-N-acetylglucosamine enolpyruvyl transferase	[Cell wall/membrane/envelope biogenesis]
Q#1299	EGY34729	specific	223837	1	421	0	720.055	COG0766	MurA	-	cl00288	UDP-N-acetylglucosamine enolpyruvyl transferase	[Cell wall/membrane/envelope biogenesis]
Q#1304	EGY34734	specific	223838	1	261	8.00492e-97	287.562	COG0767	MlaE	-	cl00510	ABC-type transporter Mla maintaining outer membrane lipid asymmetry, permease component MlaE	[Cell wall/membrane/envelope biogenesis]
Q#1469	EGY33810	multi-dom	223840	19	486	0	531.898	COG0769	MurE	-	-	UDP-N-acetylmuramyl tripeptide synthase	[Cell wall/membrane/envelope biogenesis]
Q#1468	EGY33809	multi-dom	223841	2	456	0	521.092	COG0770	MurF	-	-	UDP-N-acetylmuramyl pentapeptide synthase	[Cell wall/membrane/envelope biogenesis]
Q#1466	EGY33807	multi-dom	223842	1	432	6.86585e-180	512.98	COG0771	MurD	-	-	UDP-N-acetylmuramoylalanine-D-glutamate ligase	[Cell wall/membrane/envelope biogenesis]
Q#811	EGY32688	multi-dom	223844	2	454	0	546.794	COG0773	MurC	-	-	UDP-N-acetylmuramate-alanine ligase	[Cell wall/membrane/envelope biogenesis]
Q#1463	EGY33804	multi-dom	223844	12	475	0	668.132	COG0773	MurC	-	-	UDP-N-acetylmuramate-alanine ligase	[Cell wall/membrane/envelope biogenesis]
Q#1458	EGY33799	specific	223845	1	302	0	548.011	COG0774	LpxC	-	cl00512	UDP-3-O-acyl-N-acetylglucosamine deacetylase	[Cell wall/membrane/envelope biogenesis]
Q#575	EGY34878	multi-dom	223858	2	360	6.04203e-173	488.64	COG0787	Alr	-	-	Alanine racemase	[Cell wall/membrane/envelope biogenesis]
Q#392	EGY34489	multi-dom	223862	35	160	2.1697e-36	126.247	COG0791	Spr	N	-	Cell wall-associated hydrolase, NlpC family	[Cell wall/membrane/envelope biogenesis]
Q#1727	EGY35210	multi-dom	223862	63	166	1.11047e-33	119.314	COG0791	Spr	N	-	Cell wall-associated hydrolase, NlpC family	[Cell wall/membrane/envelope biogenesis]
Q#1330	EGY34760	specific	223867	2	269	3.78695e-109	319.53	COG0796	MurI	-	cl00518	Glutamate racemase	[Cell wall/membrane/envelope biogenesis]
Q#1819	EGY33061	multi-dom	223868	7	186	3.1131e-50	167.288	COG0797	RlpA	-	-	Rare lipoprotein A, peptidoglycan hydrolase digesting "naked" glycans, contains C-terminal SPOR domain	[Cell wall/membrane/envelope biogenesis]
Q#1140	EGY35348	multi-dom	223880	17	252	1.78042e-25	101.016	COG0810	TonB	-	-	Periplasmic protein TonB, links inner and outer membranes	[Cell wall/membrane/envelope biogenesis]
Q#1556	EGY33684	multi-dom	223882	3	333	2.9425e-123	358.835	COG0812	MurB	-	-	UDP-N-acetylenolpyruvoylglucosamine reductase	[Cell wall/membrane/envelope biogenesis]
Q#1672	EGY35155	multi-dom	223885	1	519	6.60418e-151	444.93	COG0815	Lnt	-	-	Apolipoprotein N-acyltransferase	[Cell wall/membrane/envelope biogenesis]
Q#620	EGY32383	multi-dom	223928	1	344	7.56898e-74	234.188	COG0859	RfaF	-	-	ADP-heptose:LPS heptosyltransferase	[Cell wall/membrane/envelope biogenesis]
Q#1199	EGY35407	multi-dom	223928	35	294	7.32383e-23	95.9017	COG0859	RfaF	-	-	ADP-heptose:LPS heptosyltransferase	[Cell wall/membrane/envelope biogenesis]
Q#1200	EGY35408	multi-dom	223928	30	339	1.30352e-37	138.274	COG0859	RfaF	-	-	ADP-heptose:LPS heptosyltransferase	[Cell wall/membrane/envelope biogenesis]
Q#1567	EGY33695	multi-dom	223928	1	332	4.14527e-93	283.109	COG0859	RfaF	-	-	ADP-heptose:LPS heptosyltransferase	[Cell wall/membrane/envelope biogenesis]
Q#1632	EGY34991	multi-dom	223928	8	317	2.00261e-72	230.336	COG0859	RfaF	-	-	ADP-heptose:LPS heptosyltransferase	[Cell wall/membrane/envelope biogenesis]
Q#548	EGY34851	multi-dom	223929	29	255	9.22842e-66	214.169	COG0860	AmiC	-	-	N-acetylmuramoyl-L-alanine amidase	[Cell wall/membrane/envelope biogenesis]
Q#213	EGY34310	multi-dom	224012	1	336	0	547.158	COG1087	GalE	-	-	UDP-glucose 4-epimerase	[Cell wall/membrane/envelope biogenesis]
Q#67	EGY34164	multi-dom	224013	3	353	0	596.13	COG1088	RfbB	-	-	dTDP-D-glucose 4,6-dehydratase	[Cell wall/membrane/envelope biogenesis]
Q#78	EGY34175	multi-dom	224013	1	335	0	560.307	COG1088	RfbB	-	-	dTDP-D-glucose 4,6-dehydratase	[Cell wall/membrane/envelope biogenesis]
Q#69	EGY34166	multi-dom	224016	3	285	5.30164e-129	371.239	COG1091	RfbD	-	-	dTDP-4-dehydrorhamnose reductase	[Cell wall/membrane/envelope biogenesis]
Q#1305	EGY34735	multi-dom	224052	5	258	8.31277e-137	389.26	COG1127	MlaF	-	-	ABC-type transporter Mla maintaining outer membrane lipid asymmetry, ATPase component MlaF	[Cell wall/membrane/envelope biogenesis]
Q#331	EGY34428	multi-dom	224059	3	226	4.5008e-108	328.314	COG1136	LolD	-	-	ABC-type lipoprotein export system, ATPase component	[Cell wall/membrane/envelope biogenesis]
Q#570	EGY34873	multi-dom	224059	5	227	3.32238e-110	318.684	COG1136	LolD	-	-	ABC-type lipoprotein export system, ATPase component	[Cell wall/membrane/envelope biogenesis]
Q#2048	EGY32793	multi-dom	224059	5	221	4.63788e-104	302.891	COG1136	LolD	-	-	ABC-type lipoprotein export system, ATPase component	[Cell wall/membrane/envelope biogenesis]
Q#1315	EGY34745	multi-dom	224060	1	241	1.02932e-159	445.494	COG1137	LptB	-	-	ABC-type lipopolysaccharide export system, ATPase component	[Cell wall/membrane/envelope biogenesis]
Q#250	EGY34347	multi-dom	224128	15	105	9.01237e-06	44.8637	COG1207	GlmU	C	-	Bifunctional protein GlmU, N-acetylglucosamine-1-phosphate-uridyltransferase/glucosamine-1-phosphate-acetyltransferase	[Cell wall/membrane/envelope biogenesis]
Q#732	EGY33356	multi-dom	224128	4	456	0	722.43	COG1207	GlmU	-	-	Bifunctional protein GlmU, N-acetylglucosamine-1-phosphate-uridyltransferase/glucosamine-1-phosphate-acetyltransferase	[Cell wall/membrane/envelope biogenesis]
Q#68	EGY34165	multi-dom	224130	10	298	9.21584e-168	470.134	COG1209	RmlA1	-	-	dTDP-glucose pyrophosphorylase	[Cell wall/membrane/envelope biogenesis]
Q#667	EGY32430	multi-dom	224130	1	245	1.2176e-39	141.173	COG1209	RmlA1	C	-	dTDP-glucose pyrophosphorylase	[Cell wall/membrane/envelope biogenesis]
Q#68	EGY34165	non-specific	224131	10	207	2.14592e-28	110.703	COG1210	GalU	C	cl11394	UTP-glucose-1-phosphate uridylyltransferase	[Cell wall/membrane/envelope biogenesis]
Q#340	EGY34437	non-specific	224131	48	289	2.81739e-10	59.8564	COG1210	GalU	-	cl11394	UTP-glucose-1-phosphate uridylyltransferase	[Cell wall/membrane/envelope biogenesis]
Q#667	EGY32430	specific	224131	1	295	5.04362e-167	468.168	COG1210	GalU	-	cl11394	UTP-glucose-1-phosphate uridylyltransferase	[Cell wall/membrane/envelope biogenesis]
Q#250	EGY34347	specific	224133	1	254	3.98053e-146	412.061	COG1212	KdsB	-	cl11394	CMP-2-keto-3-deoxyoctulosonic acid synthetase	[Cell wall/membrane/envelope biogenesis]
Q#115	EGY34212	specific	224265	1	227	2.10008e-73	225.143	COG1346	LrgB	-	cl00596	Putative effector of murein hydrolase	[Cell wall/membrane/envelope biogenesis]
Q#1665	EGY35024	multi-dom	224287	16	659	1.57214e-124	387.175	COG1368	MdoB	-	-	Phosphoglycerol transferase MdoB or a related enzyme of AlkP superfamily	[Cell wall/membrane/envelope biogenesis]
Q#548	EGY34851	multi-dom	224306	366	490	1.88051e-08	52.2269	COG1388	LysM	-	-	LysM repeat	[Cell wall/membrane/envelope biogenesis]
Q#548	EGY34851	multi-dom	224306	294	405	2.56448e-08	51.8417	COG1388	LysM	-	-	LysM repeat	[Cell wall/membrane/envelope biogenesis]
Q#20	EGY33479	multi-dom	224369	31	807	0	730.756	COG1452	LptD	-	-	LPS assembly outer membrane protein LptD (organic solvent tolerance protein OstA)	[Cell wall/membrane/envelope biogenesis]
Q#1303	EGY34733	multi-dom	224380	2	166	3.04372e-46	156.085	COG1463	MlaD	C	-	ABC-type transporter Mla maintaining outer membrane lipid asymmetry, periplasmic component MlaD	[Cell wall/membrane/envelope biogenesis]
Q#1960	EGY33202	multi-dom	224380	4	100	0.000284751	38.9842	COG1463	MlaD	C	-	ABC-type transporter Mla maintaining outer membrane lipid asymmetry, periplasmic component MlaD	[Cell wall/membrane/envelope biogenesis]
Q#1629	EGY34988	multi-dom	224436	2	423	0	543.802	COG1519	KdtA	-	-	3-deoxy-D-manno-octulosonic-acid transferase	[Cell wall/membrane/envelope biogenesis]
Q#330	EGY34427	multi-dom	224455	14	454	3.56567e-93	292.076	COG1538	TolC	-	-	Outer membrane protein TolC	[Cell wall/membrane/envelope biogenesis]
Q#376	EGY34473	multi-dom	224455	15	471	1.17079e-59	204.251	COG1538	TolC	-	-	Outer membrane protein TolC	[Cell wall/membrane/envelope biogenesis]
Q#252	EGY34349	specific	224577	1	301	6.12362e-140	402.474	COG1663	LpxK	-	cl21455	Tetraacyldisaccharide-1-P 4'-kinase	[Cell wall/membrane/envelope biogenesis]
Q#346	EGY34443	multi-dom	224600	18	264	3.64783e-62	203.372	COG1686	DacC	C	-	D-alanyl-D-alanine carboxypeptidase	[Cell wall/membrane/envelope biogenesis]
Q#1820	EGY33062	multi-dom	224600	17	395	7.737e-157	450.67	COG1686	DacC	-	-	D-alanyl-D-alanine carboxypeptidase	[Cell wall/membrane/envelope biogenesis]
Q#1286	EGY34716	specific	224646	204	499	7.93998e-104	315.388	COG1732	OsmF	-	cl21456	Periplasmic glycine betaine/choline-binding (lipo)protein of an ABC-type transport system (osmoprotectant binding protein)	[Cell wall/membrane/envelope biogenesis]
Q#1101	EGY35309	non-specific	224707	3	47	3.1265e-15	64.961	COG1794	RacX	N	cl00518	Aspartate/glutamate racemase	[Cell wall/membrane/envelope biogenesis]
Q#1453	EGY33794	multi-dom	224788	1	219	5.52544e-73	224.251	COG1876	LdcB	-	-	LD-carboxypeptidase LdcB, LAS superfamily	[Cell wall/membrane/envelope biogenesis]
Q#70	EGY34167	specific	224810	1	175	2.76308e-88	258.752	COG1898	RfbC	-	cl21464	dTDP-4-dehydrorhamnose 3,5-epimerase or related enzyme	[Cell wall/membrane/envelope biogenesis]
Q#1314	EGY34744	multi-dom	224845	1	172	1.39445e-58	182.95	COG1934	LptA	-	-	Lipopolysaccharide export system protein LptA	[Cell wall/membrane/envelope biogenesis]
Q#857	EGY34613	specific	224881	1	131	2.33112e-54	169.015	COG1970	MscL	-	cl00860	Large-conductance mechanosensitive channel	[Cell wall/membrane/envelope biogenesis]
Q#2080	EGY32819	multi-dom	224938	1	173	4.7229e-66	211.12	COG2027	DacB	N	-	D-alanyl-D-alanine carboxypeptidase	[Cell wall/membrane/envelope biogenesis]
Q#2081	EGY32820	multi-dom	224938	7	306	1.15964e-94	290.472	COG2027	DacB	C	-	D-alanyl-D-alanine carboxypeptidase	[Cell wall/membrane/envelope biogenesis]
Q#734	EGY33358	multi-dom	225014	10	303	2.00582e-162	457.141	COG2103	MurQ	-	-	N-acetylmuramic acid 6-phosphate (MurNAc-6-P) etherase	[Cell wall/membrane/envelope biogenesis]
Q#75	EGY34172	specific	225059	236	472	4.47394e-82	255.624	COG2148	WcaJ	-	cl00939	Sugar transferase involved in LPS biosynthesis (colanic, teichoic acid)	[Cell wall/membrane/envelope biogenesis]
Q#554	EGY34857	multi-dom	225105	1	474	2.13909e-58	204.541	COG2194	OpgE	-	-	Phosphoethanolamine transferase for periplasmic glucans (OPG), alkaline phosphatase superfamily	[Cell wall/membrane/envelope biogenesis]
Q#1272	EGY32744	multi-dom	225105	298	450	0.000420429	41.6014	COG2194	OpgE	C	-	Phosphoethanolamine transferase for periplasmic glucans (OPG), alkaline phosphatase superfamily	[Cell wall/membrane/envelope biogenesis]
Q#1916	EGY33158	multi-dom	225105	45	503	8.57955e-78	256.928	COG2194	OpgE	-	-	Phosphoethanolamine transferase for periplasmic glucans (OPG), alkaline phosphatase superfamily	[Cell wall/membrane/envelope biogenesis]
Q#60	EGY34157	multi-dom	225153	1	497	9.78292e-13	68.6259	COG2244	RfbX	-	-	Membrane protein involved in the export of O-antigen and teichoic acid	[Cell wall/membrane/envelope biogenesis]
Q#733	EGY33357	specific	225252	1	373	4.53183e-179	505.684	COG2377	AnmK	-	cl22918	1,6-Anhydro-N-acetylmuramate kinase	[Cell wall/membrane/envelope biogenesis]
Q#809	EGY32686	multi-dom	225377	12	371	2.9886e-156	447.556	COG2821	MltA	-	-	Membrane-bound lytic murein transglycosylase	[Cell wall/membrane/envelope biogenesis]
Q#531	EGY33920	non-specific	225390	1	187	0.00169669	36.6162	COG2834	LolA	-	cl19192	Outer membrane lipoprotein-sorting protein	[Cell wall/membrane/envelope biogenesis]
Q#1231	EGY33523	specific	225390	16	203	3.02839e-55	176.829	COG2834	LolA	-	cl19192	Outer membrane lipoprotein-sorting protein	[Cell wall/membrane/envelope biogenesis]
Q#1515	EGY32633	specific	225409	12	257	1.87983e-105	308.862	COG2853	VacJ	-	cl01073	ABC-type transporter Mla maintaining outer membrane lipid asymmetry, lipoprotein component MlaA	[Cell wall/membrane/envelope biogenesis]
Q#110	EGY34207	multi-dom	225425	1	475	0	788.029	COG2870	RfaE	-	-	ADP-heptose synthase, bifunctional sugar kinase/adenylyltransferase	[Cell wall/membrane/envelope biogenesis]
Q#217	EGY34314	multi-dom	225425	70	247	0.0046817	36.8903	COG2870	RfaE	NC	-	ADP-heptose synthase, bifunctional sugar kinase/adenylyltransferase	[Cell wall/membrane/envelope biogenesis]
Q#1387	EGY33624	multi-dom	225425	36	330	3.25865e-10	61.1578	COG2870	RfaE	C	-	ADP-heptose synthase, bifunctional sugar kinase/adenylyltransferase	[Cell wall/membrane/envelope biogenesis]
Q#1764	EGY33006	multi-dom	225425	26	268	2.79617e-05	43.8239	COG2870	RfaE	C	-	ADP-heptose synthase, bifunctional sugar kinase/adenylyltransferase	[Cell wall/membrane/envelope biogenesis]
Q#1851	EGY33093	multi-dom	225425	125	278	1.97899e-09	56.9206	COG2870	RfaE	NC	-	ADP-heptose synthase, bifunctional sugar kinase/adenylyltransferase	[Cell wall/membrane/envelope biogenesis]
Q#1726	EGY35209	specific	225432	2	282	0	533.804	COG2877	KdsA	-	cl17225	3-deoxy-D-manno-octulosonic acid (KDO) 8-phosphate synthase	[Cell wall/membrane/envelope biogenesis]
Q#198	EGY34295	multi-dom	225439	152	355	9.28541e-47	159.244	COG2885	OmpA	-	-	Outer membrane protein OmpA and related peptidoglycan-associated (lipo)proteins	[Cell wall/membrane/envelope biogenesis]
Q#300	EGY34397	multi-dom	225439	138	249	3.97033e-35	126.117	COG2885	OmpA	N	-	Outer membrane protein OmpA and related peptidoglycan-associated (lipo)proteins	[Cell wall/membrane/envelope biogenesis]
Q#789	EGY32758	multi-dom	225439	145	345	4.02971e-42	146.532	COG2885	OmpA	-	-	Outer membrane protein OmpA and related peptidoglycan-associated (lipo)proteins	[Cell wall/membrane/envelope biogenesis]
Q#1356	EGY33593	multi-dom	225439	1	155	5.97107e-44	145.377	COG2885	OmpA	-	-	Outer membrane protein OmpA and related peptidoglycan-associated (lipo)proteins	[Cell wall/membrane/envelope biogenesis]
Q#1652	EGY35011	specific	225444	4	159	7.97686e-29	105.414	COG2891	MreD	-	cl01087	Cell shape-determining protein MreD	[Cell wall/membrane/envelope biogenesis]
Q#2010	EGY33252	specific	225460	5	234	2.51627e-90	269.165	COG2908	LpxH	-	cl13995	UDP-2,3-diacylglucosamine pyrophosphatase LpxH	[Cell wall/membrane/envelope biogenesis]
Q#300	EGY34397	specific	225465	19	128	5.30269e-23	92.0832	COG2913	BamE	C	cl19285	Outer membrane protein assembly factor BamE, lipoprotein component of the BamABCDE complex	[Cell wall/membrane/envelope biogenesis]
Q#677	EGY32440	specific	225465	6	137	5.38003e-38	127.907	COG2913	BamE	-	cl19285	Outer membrane protein assembly factor BamE, lipoprotein component of the BamABCDE complex	[Cell wall/membrane/envelope biogenesis]
Q#282	EGY34379	non-specific	225500	5	226	1.0711e-101	297.757	COG2949	SanA	-	cl00630	Uncharacterized periplasmic protein SanA, affects membrane permeability for vancomycin	[Cell wall/membrane/envelope biogenesis]
Q#66	EGY34163	multi-dom	225501	18	332	3.0608e-102	306.983	COG2951	MltB	-	-	Membrane-bound lytic murein transglycosylase B	[Cell wall/membrane/envelope biogenesis]
Q#165	EGY34262	multi-dom	225504	10	390	0	545.84	COG2956	YciM	-	-	Lipopolysaccharide biosynthesis regulator YciM, contains six TPR domains and a predicted metal-binding C-terminal domain	[Cell wall/membrane/envelope biogenesis]
Q#1165	EGY35373	specific	225527	2	167	4.00661e-70	212.231	COG2980	LptE	-	cl01125	Outer membrane lipoprotein LptE/RlpB (LPS assembly)	[Cell wall/membrane/envelope biogenesis]
Q#1246	EGY33538	multi-dom	225536	1	502	3.05448e-160	470.015	COG2989	YcbB	-	-	Murein L,D-transpeptidase YcbB/YkuD	[Cell wall/membrane/envelope biogenesis]
Q#1222	EGY33514	specific	225562	18	208	5.65021e-72	219.587	COG3017	LolB	-	cl19307	Outer membrane lipoprotein LolB, involved in outer membrane biogenesis	[Cell wall/membrane/envelope biogenesis]
Q#1891	EGY33133	multi-dom	225567	7	182	9.96608e-79	237.645	COG3023	AmpD	C	-	N-acetyl-anhydromuramyl-L-alanine amidase AmpD	[Cell wall/membrane/envelope biogenesis]
Q#919	EGY32323	specific	225589	1	215	3.51177e-68	210.676	COG3047	OmpW	-	cl21487	Outer membrane protein W	[Cell wall/membrane/envelope biogenesis]
Q#1089	EGY34078	multi-dom	225597	26	376	6.74523e-176	497.667	COG3055	NanM	-	-	N-acetylneuraminic acid mutarotase	[Cell wall/membrane/envelope biogenesis]
Q#227	EGY34324	multi-dom	225606	49	149	0.000113425	43.7842	COG3064	TolA	NC	-	Membrane protein involved in colicin uptake	[Cell wall/membrane/envelope biogenesis]
Q#1354	EGY33591	multi-dom	225606	1	392	1.02481e-60	202.872	COG3064	TolA	-	-	Membrane protein involved in colicin uptake	[Cell wall/membrane/envelope biogenesis]
Q#96	EGY34193	non-specific	225607	1	181	7.01193e-52	166.831	COG3065	Slp	-	cl01164	Starvation-inducible outer membrane lipoprotein	[Cell wall/membrane/envelope biogenesis]
Q#674	EGY32437	multi-dom	225625	5	579	0	754.649	COG3083	YejM	-	-	Membrane-anchored periplasmic protein YejM, alkaline phosphatase superfamily	[Cell wall/membrane/envelope biogenesis]
Q#294	EGY34391	multi-dom	225649	1	569	0	636.464	COG3107	LpoA	-	-	Outer membrane lipoprotein LpoA, binds and activates PBP1a	[Cell wall/membrane/envelope biogenesis]
Q#1301	EGY34731	specific	225655	7	112	2.63634e-28	100.489	COG3113	MlaB	-	cl00604	ABC-type transporter Mla maintaining outer membrane lipid asymmetry, MlaB component, contains STAS domain	[Cell wall/membrane/envelope biogenesis]
Q#1313	EGY34743	specific	225659	1	191	2.38394e-59	186.065	COG3117	YrbK	-	cl21541	Lipopolysaccharide export system protein LptC	[Cell wall/membrane/envelope biogenesis]
Q#1723	EGY35206	non-specific	225675	1	144	1.11174e-39	132.974	COG3133	SlyB	-	cl10470	Outer membrane lipoprotein SlyB	[Cell wall/membrane/envelope biogenesis]
Q#1713	EGY35196	specific	225744	22	350	5.08166e-40	145.611	COG3203	OmpC	-	cl21487	Outer membrane protein (porin)	[Cell wall/membrane/envelope biogenesis]
Q#176	EGY34273	multi-dom	225803	205	1104	0	729.947	COG3264	MscK	-	-	Small-conductance mechanosensitive channel	[Cell wall/membrane/envelope biogenesis]
Q#61	EGY34158	specific	225843	1	234	1.82654e-40	141.743	COG3306	COG3306	-	cl01298	Glycosyltransferase involved in LPS biosynthesis, GR25 family	[Cell wall/membrane/envelope biogenesis]
Q#1201	EGY35409	specific	225843	7	213	5.66363e-31	115.549	COG3306	COG3306	-	cl01298	Glycosyltransferase involved in LPS biosynthesis, GR25 family	[Cell wall/membrane/envelope biogenesis]
Q#1203	EGY35411	specific	225843	7	267	7.87969e-59	190.278	COG3306	COG3306	-	cl01298	Glycosyltransferase involved in LPS biosynthesis, GR25 family	[Cell wall/membrane/envelope biogenesis]
Q#1742	EGY32984	multi-dom	225844	1	335	1.4683e-15	76.0029	COG3307	RfaL	N	-	O-antigen ligase	[Cell wall/membrane/envelope biogenesis]
Q#198	EGY34295	specific	226163	68	218	6.34835e-07	48.1472	COG3637	LomR	N	cl21487	Opacity protein and related surface antigens	[Cell wall/membrane/envelope biogenesis]
Q#789	EGY32758	specific	226163	1	208	1.31399e-06	46.9917	COG3637	LomR	-	cl21487	Opacity protein and related surface antigens	[Cell wall/membrane/envelope biogenesis]
Q#1575	EGY33703	specific	226163	1	184	2.86141e-12	60.8588	COG3637	LomR	-	cl21487	Opacity protein and related surface antigens	[Cell wall/membrane/envelope biogenesis]
Q#178	EGY34275	multi-dom	226293	8	290	8.82578e-172	480.033	COG3770	MepA	-	-	Murein endopeptidase	[Cell wall/membrane/envelope biogenesis]
Q#1204	EGY35412	multi-dom	226297	65	169	0.000804503	39.3475	COG3774	OCH1	C	-	Mannosyltransferase OCH1 or related enzyme	[Cell wall/membrane/envelope biogenesis]
Q#1842	EGY33084	multi-dom	226297	1	262	1.37024e-66	212.687	COG3774	OCH1	-	-	Mannosyltransferase OCH1 or related enzyme	[Cell wall/membrane/envelope biogenesis]
Q#2092	EGY32831	non-specific	226464	1	207	5.89632e-75	227.432	COG3955	COG3955	-	cl01628	Uncharacterized protein, DUF1919 family	[Cell wall/membrane/envelope biogenesis]
Q#1662	EGY35021	multi-dom	226590	18	256	3.60799e-82	249.538	COG4105	BamD	-	-	Outer membrane protein assembly factor BamD, BamD/ComL family	[Cell wall/membrane/envelope biogenesis]
Q#569	EGY34872	multi-dom	226957	1	394	5.66836e-116	346.588	COG4591	LolE	-	-	ABC-type transport system, involved in lipoprotein release, permease component	[Cell wall/membrane/envelope biogenesis]
Q#571	EGY34874	multi-dom	226957	1	415	7.46141e-131	385.493	COG4591	LolE	-	-	ABC-type transport system, involved in lipoprotein release, permease component	[Cell wall/membrane/envelope biogenesis]
Q#2049	EGY32794	multi-dom	226957	25	379	1.2987e-22	96.5937	COG4591	LolE	-	-	ABC-type transport system, involved in lipoprotein release, permease component	[Cell wall/membrane/envelope biogenesis]
Q#997	EGY35261	multi-dom	227116	1	803	0	783.849	COG4775	BamA	-	-	Outer membrane protein assembly factor BamA	[Cell wall/membrane/envelope biogenesis]
Q#1894	EGY33136	multi-dom	227124	20	296	2.81001e-131	378.006	COG4785	NlpI	-	-	Lipoprotein NlpI, contains TPR repeats	[Cell wall/membrane/envelope biogenesis]
Q#2107	EGY32846	multi-dom	227289	12	775	0	812.388	COG4953	PbpC	-	-	Membrane carboxypeptidase/penicillin-binding protein PbpC	[Cell wall/membrane/envelope biogenesis]
Q#1186	EGY35394	multi-dom	227342	1	854	0	1117.01	COG5009	MrcA	-	-	Membrane carboxypeptidase/penicillin-binding protein	[Cell wall/membrane/envelope biogenesis]
Q#1215	EGY33507	multi-dom	224843	1	358	0	539.159	COG1932	SerC	-	-	Phosphoserine aminotransferase	[Coenzyme transport and metabolism, Amino acid transport and metabolism]
Q#450	EGY34547	specific	223468	11	307	1.49911e-94	286.08	COG0391	CofD	-	cl00425	Archaeal 2-phospho-L-lactate transferase/Bacterial gluconeogenesis factor, CofD/UPF0052 family	[Coenzyme transport and metabolism, Carbohydrate transport and metabolism]
Q#846	EGY32723	multi-dom	223727	2	41	0.000552863	34.681	COG0654	UbiH	N	-	2-polyprenyl-6-methoxyphenol hydroxylase and related FAD-dependent oxidoreductases	[Coenzyme transport and metabolism, Energy production and conversion]
Q#932	EGY33950	multi-dom	223189	9	337	1.84311e-127	373.572	COG0111	SerA	-	-	Phosphoglycerate dehydrogenase or related dehydrogenase	[Coenzyme transport and metabolism, General function prediction only]
Q#399	EGY34496	multi-dom	223635	88	142	2.69613e-07	47.7916	COG0561	Cof	N	-	Hydroxymethylpyrimidine pyrophosphatase and other HAD family phosphatases	[Coenzyme transport and metabolism, General function prediction only]
Q#507	EGY33896	multi-dom	223635	10	270	3.27916e-49	165.277	COG0561	Cof	-	-	Hydroxymethylpyrimidine pyrophosphatase and other HAD family phosphatases	[Coenzyme transport and metabolism, General function prediction only]
Q#804	EGY32681	multi-dom	223635	264	316	3.94797e-07	49.3324	COG0561	Cof	N	-	Hydroxymethylpyrimidine pyrophosphatase and other HAD family phosphatases	[Coenzyme transport and metabolism, General function prediction only]
Q#1600	EGY33728	multi-dom	223635	132	390	6.17601e-64	207.649	COG0561	Cof	-	-	Hydroxymethylpyrimidine pyrophosphatase and other HAD family phosphatases	[Coenzyme transport and metabolism, General function prediction only]
Q#1739	EGY32981	multi-dom	223635	4	271	2.37112e-64	204.568	COG0561	Cof	-	-	Hydroxymethylpyrimidine pyrophosphatase and other HAD family phosphatases	[Coenzyme transport and metabolism, General function prediction only]
Q#1775	EGY33017	multi-dom	223635	1	272	5.05344e-79	242.317	COG0561	Cof	-	-	Hydroxymethylpyrimidine pyrophosphatase and other HAD family phosphatases	[Coenzyme transport and metabolism, General function prediction only]
Q#173	EGY34270	multi-dom	223669	18	259	2.3495e-36	131.674	COG0596	MhpC	-	-	Pimeloyl-ACP methyl ester carboxylesterase	[Coenzyme transport and metabolism, General function prediction only]
Q#695	EGY32458	multi-dom	223669	38	122	0.00301336	37.2999	COG0596	MhpC	C	-	Pimeloyl-ACP methyl ester carboxylesterase	[Coenzyme transport and metabolism, General function prediction only]
Q#1937	EGY33179	multi-dom	223669	2	243	1.65108e-21	90.0723	COG0596	MhpC	-	-	Pimeloyl-ACP methyl ester carboxylesterase	[Coenzyme transport and metabolism, General function prediction only]
Q#269	EGY34366	multi-dom	223585	16	74	7.52499e-10	57.0074	COG0511	AccB	N	-	Biotin carboxyl carrier protein	[Coenzyme transport and metabolism, Lipid transport and metabolism]
Q#372	EGY34469	multi-dom	223585	47	77	0.000357678	35.4362	COG0511	AccB	N	-	Biotin carboxyl carrier protein	[Coenzyme transport and metabolism, Lipid transport and metabolism]
Q#421	EGY34518	multi-dom	223585	526	597	2.70069e-22	93.6013	COG0511	AccB	N	-	Biotin carboxyl carrier protein	[Coenzyme transport and metabolism, Lipid transport and metabolism]
Q#1871	EGY33113	multi-dom	223585	6	155	5.559e-35	120.565	COG0511	AccB	-	-	Biotin carboxyl carrier protein	[Coenzyme transport and metabolism, Lipid transport and metabolism]
Q#316	EGY34413	multi-dom	224076	3	617	0	1069.51	COG1154	Dxs	-	-	Deoxyxylulose-5-phosphate synthase	[Coenzyme transport and metabolism, Lipid transport and metabolism]
Q#2067	EGY35125	non-specific	226221	11	183	7.81163e-64	206.529	COG3697	CitX	-	cl01498	Phosphoribosyl-dephospho-CoA transferase (holo-ACP synthetase)	[Coenzyme transport and metabolism, Lipid transport and metabolism]
Q#1939	EGY33181	multi-dom	224091	8	423	8.22417e-133	392.071	COG1169	MenF	-	-	Isochorismate synthase EntC	[Coenzyme transport and metabolism, Secondary metabolites biosynthesis, transport and catabolism]
Q#2119	EGY32858	multi-dom	223267	1	298	6.3677e-87	265.382	COG0189	RimK	-	-	Glutathione synthase/RimK-type ligase, ATP-grasp superfamily	[Coenzyme transport and metabolism, Translation, ribosomal structure and biogenesis]
Q#452	EGY34549	multi-dom	223378	1	384	1.64583e-142	417.062	COG0301	ThiI	-	-	Adenylyl- and sulfurtransferase ThiI, participates in tRNA 4-thiouridine and thiamine biosynthesis	[Coenzyme transport and metabolism, Translation, ribosomal structure and biogenesis]
Q#2060	EGY32805	multi-dom	223080	3	425	0	748.254	COG0001	HemL	-	-	Glutamate-1-semialdehyde aminotransferase	[Coenzyme transport and metabolism]
Q#579	EGY34882	specific	223132	1	153	8.40784e-75	222.864	COG0054	RibE	-	cl00317	6,7-dimethyl-8-ribityllumazine synthase (Riboflavin synthase beta chain)	[Coenzyme transport and metabolism]
Q#1683	EGY35166	non-specific	223132	295	376	0.00228153	37.5833	COG0054	RibE	C	cl00317	6,7-dimethyl-8-ribityllumazine synthase (Riboflavin synthase beta chain)	[Coenzyme transport and metabolism]
Q#1505	EGY32623	specific	223186	14	212	1.58065e-109	315.664	COG0108	RibB	-	cl00336	3,4-dihydroxy-2-butanone 4-phosphate synthase	[Coenzyme transport and metabolism]
Q#1118	EGY35326	specific	223191	9	333	0	589.528	COG0113	HemB	-	cl00338	Delta-aminolevulinic acid dehydratase, porphobilinogen synthase	[Coenzyme transport and metabolism]
Q#1038	EGY34027	specific	223195	4	149	7.91262e-83	251.403	COG0117	RibD1	-	cl00269	Pyrimidine deaminase domain of riboflavin biosynthesis protein RibD	[Coenzyme transport and metabolism]
Q#260	EGY34357	non-specific	223210	1	225	5.74216e-05	43.8082	COG0132	BioD	-	cl21455	Dethiobiotin synthetase	[Coenzyme transport and metabolism]
Q#439	EGY34536	specific	223210	1	235	5.46538e-81	244.497	COG0132	BioD	-	cl21455	Dethiobiotin synthetase	[Coenzyme transport and metabolism]
Q#317	EGY34414	specific	223220	3	296	2.24914e-83	256.531	COG0142	IspA	-	cl00210	Geranylgeranyl pyrophosphate synthase	[Coenzyme transport and metabolism]
Q#843	EGY32720	specific	223220	4	323	4.88695e-105	312.77	COG0142	IspA	-	cl00210	Geranylgeranyl pyrophosphate synthase	[Coenzyme transport and metabolism]
Q#1375	EGY33612	multi-dom	223234	34	208	1.11455e-07	52.2556	COG0156	BioF	C	-	7-keto-8-aminopelargonate synthetase or related enzyme	[Coenzyme transport and metabolism]
Q#2102	EGY32841	multi-dom	223235	1	280	2.88422e-98	292.552	COG0157	NadC	-	-	Nicotinate-nucleotide pyrophosphorylase	[Coenzyme transport and metabolism]
Q#1193	EGY35401	non-specific	223241	6	109	1.33632e-07	49.8937	COG0163	UbiX	C	cl19190	3-polyprenyl-4-hydroxybenzoate decarboxylase	[Coenzyme transport and metabolism]
Q#220	EGY34317	non-specific	223249	205	249	6.76072e-06	46.4814	COG0171	NadE	C	cl00292	NH3-dependent NAD+ synthetase	[Coenzyme transport and metabolism]
Q#659	EGY32422	non-specific	223249	16	91	0.00527168	36.8514	COG0171	NadE	C	cl00292	NH3-dependent NAD+ synthetase	[Coenzyme transport and metabolism]
Q#711	EGY32474	multi-dom	223259	44	347	2.88123e-168	474.369	COG0181	HemC	-	-	Porphobilinogen deaminase	[Coenzyme transport and metabolism]
Q#615	EGY32378	multi-dom	223268	4	284	3.00273e-156	440.078	COG0190	FolD	-	-	5,10-methylene-tetrahydrofolate dehydrogenase/Methenyl tetrahydrofolate cyclohydrolase	[Coenzyme transport and metabolism]
Q#1935	EGY33177	multi-dom	223270	1	371	0	722.828	COG0192	MetK	-	-	S-adenosylmethionine synthetase	[Coenzyme transport and metabolism]
Q#800	EGY32677	multi-dom	223274	1	306	5.75626e-138	395.477	COG0196	RibF	-	-	FAD synthase	[Coenzyme transport and metabolism]
Q#1661	EGY35020	specific	223290	1	172	5.87032e-57	179.406	COG0212	FAU1	-	cl00360	5-formyltetrahydrofolate cyclo-ligase	[Coenzyme transport and metabolism]
Q#1886	EGY33128	multi-dom	223315	1	205	1.1719e-77	234.103	COG0237	CoaE	-	-	Dephospho-CoA kinase	[Coenzyme transport and metabolism]
Q#1592	EGY33720	multi-dom	223337	2	210	8.65429e-107	308.838	COG0259	PdxH	-	-	Pyridoxine/pyridoxamine 5'-phosphate oxidase	[Coenzyme transport and metabolism]
Q#1794	EGY33036	specific	223340	2	160	4.84108e-61	188.303	COG0262	FolA	-	cl17279	Dihydrofolate reductase	[Coenzyme transport and metabolism]
Q#786	EGY32755	multi-dom	223353	2	324	3.656e-143	411.264	COG0276	HemH	-	-	Protoheme ferro-lyase (ferrochelatase)	[Coenzyme transport and metabolism]
Q#320	EGY34417	multi-dom	223362	5	447	2.13318e-162	468.28	COG0285	FolC	-	-	Folylpolyglutamate synthase/Dihydropteroate synthase	[Coenzyme transport and metabolism]
Q#1733	EGY35216	multi-dom	223371	15	270	7.61951e-108	316.562	COG0294	FolP	-	-	Dihydropteroate synthase	[Coenzyme transport and metabolism]
Q#2079	EGY32818	specific	223379	26	218	2.02898e-91	269.482	COG0302	FolE	-	cl00263	GTP cyclohydrolase I	[Coenzyme transport and metabolism]
Q#1009	EGY35273	multi-dom	223380	5	145	4.40565e-07	47.604	COG0303	MoeA	NC	-	Molybdopterin biosynthesis enzyme	[Coenzyme transport and metabolism]
Q#2078	EGY32817	multi-dom	223380	1	402	0	512.925	COG0303	MoeA	-	-	Molybdopterin biosynthesis enzyme	[Coenzyme transport and metabolism]
Q#2086	EGY32825	multi-dom	223384	1	204	6.86799e-103	298.362	COG0307	RibC	-	-	Riboflavin synthase alpha chain	[Coenzyme transport and metabolism]
Q#445	EGY34542	specific	223391	1	149	1.76218e-65	198.661	COG0314	MoaE	-	cl00399	Molybdopterin synthase catalytic subunit	[Coenzyme transport and metabolism]
Q#447	EGY34544	specific	223392	1	158	8.79264e-93	269.093	COG0315	MoaC	-	cl00242	Molybdenum cofactor biosynthesis enzyme	[Coenzyme transport and metabolism]
Q#1823	EGY33065	multi-dom	223397	13	320	0	572.675	COG0320	LipA	-	-	Lipoate synthase	[Coenzyme transport and metabolism]
Q#1822	EGY33064	specific	223398	1	208	2.37457e-108	313.054	COG0321	LipB	-	cl14057	Lipoate-protein ligase B	[Coenzyme transport and metabolism]
Q#2145	EGY32884	specific	223404	1	251	3.46695e-103	302.691	COG0327	NIF3	-	cl15371	Putative GTP cyclohydrolase 1 type 2, NIF3 family	[Coenzyme transport and metabolism]
Q#1737	EGY35220	multi-dom	223417	78	309	3.1481e-72	225.27	COG0340	BirA2	-	-	Biotin-(acetyl-CoA carboxylase) ligase	[Coenzyme transport and metabolism]
Q#660	EGY32423	non-specific	223429	2	55	2.17099e-07	44.1633	COG0352	ThiE	NC	cl21457	Thiamine monophosphate synthase	[Coenzyme transport and metabolism]
Q#208	EGY34305	multi-dom	223450	1	434	5.17165e-159	458.635	COG0373	HemA	-	-	Glutamyl-tRNA reductase	[Coenzyme transport and metabolism]
Q#702	EGY32465	specific	223484	1	352	0	512.564	COG0407	HemE	-	cl00464	Uroporphyrinogen-III decarboxylase	[Coenzyme transport and metabolism]
Q#1866	EGY33108	multi-dom	223524	6	285	0	581.685	COG0447	MenB	-	-	1,4-Dihydroxy-2-naphthoyl-CoA synthase	[Coenzyme transport and metabolism]
Q#1193	EGY35401	multi-dom	223529	5	397	1.91216e-170	485.321	COG0452	CoaBC	-	-	Phosphopantothenoylcysteine synthetase/decarboxylase	[Coenzyme transport and metabolism]
Q#2077	EGY32816	multi-dom	223552	1	240	6.62431e-91	271.195	COG0476	ThiF	-	-	Molybdopterin or thiamine biosynthesis adenylyltransferase	[Coenzyme transport and metabolism]
Q#1086	EGY34075	multi-dom	223576	9	332	1.03673e-162	460.573	COG0502	BioB	-	-	Biotin synthase or related enzyme	[Coenzyme transport and metabolism]
Q#1009	EGY35273	specific	223595	5	179	2.57965e-69	210.967	COG0521	MoaB	-	cl00451	Molybdopterin biosynthesis enzyme MoaB	[Coenzyme transport and metabolism]
Q#581	EGY34884	multi-dom	223684	4	326	6.93849e-136	391.677	COG0611	ThiL	-	-	Thiamine monophosphate kinase	[Coenzyme transport and metabolism]
Q#1019	EGY34008	specific	223692	93	216	7.61797e-09	53.1354	COG0619	EcfT	N	cl00463	Energy-coupling factor transporter transmembrane protein EcfT	[Coenzyme transport and metabolism]
Q#930	EGY33948	multi-dom	223708	3	391	1.67856e-158	455.577	COG0635	HemN	-	-	Coproporphyrinogen III oxidase or related Fe-S oxidoreductase	[Coenzyme transport and metabolism]
Q#1863	EGY33105	multi-dom	223708	12	443	1.62503e-154	447.873	COG0635	HemN	-	-	Coproporphyrinogen III oxidase or related Fe-S oxidoreductase	[Coenzyme transport and metabolism]
Q#1630	EGY34989	specific	223741	1	156	1.40135e-80	237.835	COG0669	CoaD	-	cl00015	Phosphopantetheine adenylyltransferase	[Coenzyme transport and metabolism]
Q#2071	EGY35129	non-specific	223741	218	398	2.57487e-08	51.7839	COG0669	CoaD	-	cl00015	Phosphopantetheine adenylyltransferase	[Coenzyme transport and metabolism]
Q#2147	EGY32886	specific	223792	1	139	4.873e-37	124.714	COG0720	QueD	-	cl00263	6-pyruvoyl-tetrahydropterin synthase	[Coenzyme transport and metabolism]
Q#1767	EGY33009	specific	223817	1	193	3.4005e-66	203.684	COG0746	MobA	-	cl11394	Molybdopterin-guanine dinucleotide biosynthesis protein A	[Coenzyme transport and metabolism]
Q#257	EGY34354	specific	223872	1	160	7.22706e-76	226.374	COG0801	FolK	-	cl00233	7,8-dihydro-6-hydroxymethylpterin-pyrophosphokinase	[Coenzyme transport and metabolism]
Q#80	EGY34177	specific	223878	2	196	3.5459e-107	309.275	COG0807	RibA	-	cl00522	GTP cyclohydrolase II	[Coenzyme transport and metabolism]
Q#1571	EGY33699	non-specific	223878	155	255	0.00410801	37.7089	COG0807	RibA	N	cl00522	GTP cyclohydrolase II	[Coenzyme transport and metabolism]
Q#517	EGY33906	multi-dom	223943	12	235	3.95873e-27	104.599	COG1011	YigB	-	-	FMN phosphatase YigB, HAD superfamily	[Coenzyme transport and metabolism]
Q#623	EGY32386	multi-dom	223943	5	198	4.68893e-25	98.4362	COG1011	YigB	-	-	FMN phosphatase YigB, HAD superfamily	[Coenzyme transport and metabolism]
Q#1111	EGY35319	multi-dom	223943	8	219	6.33633e-25	98.4362	COG1011	YigB	-	-	FMN phosphatase YigB, HAD superfamily	[Coenzyme transport and metabolism]
Q#7	EGY33301	specific	223984	63	224	4.04791e-54	179.458	COG1056	NadR	-	cl00015	Nicotinamide mononucleotide adenylyltransferase	[Coenzyme transport and metabolism]
Q#28	EGY33487	specific	223998	12	296	3.29247e-143	408.568	COG1072	CoaA	-	cl17190	Panthothenate kinase	[Coenzyme transport and metabolism]
Q#1696	EGY35179	non-specific	223998	125	208	3.25939e-10	58.0366	COG1072	CoaA	N	cl17190	Panthothenate kinase	[Coenzyme transport and metabolism]
Q#1938	EGY33180	multi-dom	224087	1	566	0	774.96	COG1165	MenD	-	-	2-succinyl-5-enolpyruvyl-6-hydroxy-3-cyclohexene-1-carboxylate synthase	[Coenzyme transport and metabolism]
Q#1869	EGY33111	multi-dom	224358	4	327	0	572.142	COG1441	MenC	-	-	O-succinylbenzoate synthase	[Coenzyme transport and metabolism]
Q#657	EGY32420	specific	224394	39	360	5.30191e-134	388.982	COG1477	ApbE	-	cl19294	Thiamine biosynthesis lipoprotein ApbE	[Coenzyme transport and metabolism]
Q#1282	EGY34712	multi-dom	224405	8	468	6.834e-62	208.694	COG1488	PncB	-	-	Nicotinic acid phosphoribosyltransferase	[Coenzyme transport and metabolism]
Q#1946	EGY33188	specific	224456	1	117	2.09841e-44	142.757	COG1539	FolB	-	cl00263	Dihydroneopterin aldolase	[Coenzyme transport and metabolism]
Q#1900	EGY33142	specific	224491	1	294	1.20542e-94	284.535	COG1575	MenA	-	cl00337	1,4-dihydroxy-2-naphthoate octaprenyltransferase	[Coenzyme transport and metabolism]
Q#712	EGY32475	specific	224503	1	247	4.0616e-55	179.124	COG1587	HemD	-	cl03649	Uroporphyrinogen-III synthase	[Coenzyme transport and metabolism]
Q#270	EGY34367	non-specific	224550	9	43	0.000269314	41.1557	COG1635	THI4	C	cl21454	Archaeal ribulose 1,5-bisphosphate synthetase/yeast thiazole synthase	[Coenzyme transport and metabolism]
Q#736	EGY33360	non-specific	224550	31	80	0.0037332	37.6889	COG1635	THI4	C	cl21454	Archaeal ribulose 1,5-bisphosphate synthetase/yeast thiazole synthase	[Coenzyme transport and metabolism]
Q#16	EGY33475	specific	224677	1	158	6.80457e-64	196.022	COG1763	MobB	-	cl21455	Molybdopterin-guanine dinucleotide biosynthesis protein	[Coenzyme transport and metabolism]
Q#2067	EGY35125	specific	224681	180	459	1.63094e-70	227.651	COG1767	CitG	-	cl00768	Triphosphoribosyl-dephospho-CoA synthetase	[Coenzyme transport and metabolism]
Q#446	EGY34543	specific	224888	1	81	8.65965e-23	84.2813	COG1977	MoaD	-	cl00155	Molybdopterin converting factor, small subunit	[Coenzyme transport and metabolism]
Q#1038	EGY34027	specific	224896	150	374	9.87715e-76	236.054	COG1985	RibD	-	cl17279	Pyrimidine reductase, riboflavin biosynthesis	[Coenzyme transport and metabolism]
Q#732	EGY33356	non-specific	224979	1	145	1.19469e-20	88.9358	COG2068	MocA	C	cl11394	CTP:molybdopterin cytidylyltransferase MocA	[Coenzyme transport and metabolism]
Q#1277	EGY34707	multi-dom	225002	1	220	1.09025e-47	159.077	COG2091	Sfp	-	-	Phosphopantetheinyl transferase	[Coenzyme transport and metabolism]
Q#1979	EGY33221	multi-dom	225136	41	143	4.39365e-14	68.0596	COG2226	UbiE	NC	-	Ubiquinone/menaquinone biosynthesis C-methylase UbiE	[Coenzyme transport and metabolism]
Q#1705	EGY35188	multi-dom	225137	87	226	5.98469e-07	48.4825	COG2227	UbiG	C	-	2-polyprenyl-3-methyl-5-hydroxy-6-metoxy-1,4-benzoquinol methylase	[Coenzyme transport and metabolism]
Q#1804	EGY33046	multi-dom	225137	3	116	5.72028e-08	50.0233	COG2227	UbiG	NC	-	2-polyprenyl-3-methyl-5-hydroxy-6-metoxy-1,4-benzoquinol methylase	[Coenzyme transport and metabolism]
Q#217	EGY34314	specific	225149	2	285	3.77694e-133	381.623	COG2240	PdxK	-	cl00192	Pyridoxal/pyridoxine/pyridoxamine kinase	[Coenzyme transport and metabolism]
Q#763	EGY33387	multi-dom	225151	65	156	4.79748e-06	44.1563	COG2242	CobL	C	-	Precorrin-6B methylase 2	[Coenzyme transport and metabolism]
Q#448	EGY34545	multi-dom	225449	13	337	2.15998e-150	428.95	COG2896	MoaA	-	-	Molybdenum cofactor biosynthesis enzyme MoaA	[Coenzyme transport and metabolism]
Q#1917	EGY33159	non-specific	225470	1	477	2.29283e-169	500.821	COG2918	GshA	-	cl00954	Gamma-glutamylcysteine synthetase	[Coenzyme transport and metabolism]
Q#1329	EGY34759	non-specific	225703	8	158	3.86395e-28	104.014	COG3161	UbiC	-	cl01230	4-hydroxybenzoate synthetase (chorismate-pyruvate lyase)	[Coenzyme transport and metabolism]
Q#7	EGY33301	specific	225713	224	409	6.05041e-111	326.709	COG3172	NadR3	-	cl21455	Nicotinamide riboside kinase	[Coenzyme transport and metabolism]
Q#1585	EGY33713	specific	225742	18	229	1.02055e-57	184.499	COG3201	PnuC	-	cl01256	Nicotinamide riboside transporter PnuC	[Coenzyme transport and metabolism]
Q#1993	EGY33235	specific	225977	1	127	4.27834e-91	262.211	COG3445	GrcA	-	cl21517	Autonomous glycyl radical cofactor GrcA	[Coenzyme transport and metabolism]
Q#2004	EGY33246	non-specific	225977	707	770	5.32944e-32	121.613	COG3445	GrcA	N	cl21517	Autonomous glycyl radical cofactor GrcA	[Coenzyme transport and metabolism]
Q#380	EGY34477	specific	226113	1	69	4.48662e-21	79.0204	COG3585	MopI	-	cl01440	Molybdopterin-binding protein	[Coenzyme transport and metabolism]
Q#1030	EGY34019	non-specific	226113	289	353	1.68986e-06	45.1229	COG3585	MopI	-	cl01440	Molybdopterin-binding protein	[Coenzyme transport and metabolism]
Q#1033	EGY34022	non-specific	226113	126	189	2.00478e-05	40.8857	COG3585	MopI	-	cl01440	Molybdopterin-binding protein	[Coenzyme transport and metabolism]
Q#1081	EGY34070	specific	226624	1	334	1.18458e-143	412.528	COG4143	TbpA	-	cl21456	ABC-type thiamine transport system, periplasmic component	[Coenzyme transport and metabolism]
Q#1876	EGY33118	specific	226625	3	477	0	612.079	COG4145	PanF	-	cl00456	Na+/panthothenate symporter	[Coenzyme transport and metabolism]
Q#387	EGY34484	multi-dom	226664	1	195	2.69213e-19	85.9401	COG4206	BtuB	C	-	Outer membrane cobalamin receptor protein	[Coenzyme transport and metabolism]
Q#2	EGY33296	specific	226982	1	170	1.956e-70	213.09	COG4635	HemG	-	cl00438	Protoporphyrinogen IX oxidase, menaquinone-dependent (flavodoxin domain)	[Coenzyme transport and metabolism]
Q#186	EGY34283	specific	223329	1	117	3.66738e-30	106.191	COG0251	RidA	-	cl10015	Enamine deaminase RidA, house cleaning of reactive enamine intermediates, YjgF/YER057c/UK114 family	[Defense mechanisms]
Q#2159	EGY35093	specific	223329	1	128	6.04562e-49	155.112	COG0251	RidA	-	cl10015	Enamine deaminase RidA, house cleaning of reactive enamine intermediates, YjgF/YER057c/UK114 family	[Defense mechanisms]
Q#595	EGY34898	multi-dom	223363	1	177	7.05054e-41	144.096	COG0286	HsdM	N	-	Type I restriction-modification system, DNA methylase subunit	[Defense mechanisms]
Q#596	EGY34899	multi-dom	223363	16	180	3.17772e-53	178.379	COG0286	HsdM	NC	-	Type I restriction-modification system, DNA methylase subunit	[Defense mechanisms]
Q#597	EGY34900	multi-dom	223363	5	149	2.30126e-21	89.0128	COG0286	HsdM	C	-	Type I restriction-modification system, DNA methylase subunit	[Defense mechanisms]
Q#778	EGY33402	multi-dom	223363	38	272	3.86741e-16	77.4568	COG0286	HsdM	C	-	Type I restriction-modification system, DNA methylase subunit	[Defense mechanisms]
Q#779	EGY33403	multi-dom	223363	8	149	3.24323e-22	91.7092	COG0286	HsdM	N	-	Type I restriction-modification system, DNA methylase subunit	[Defense mechanisms]
Q#1906	EGY33148	multi-dom	223363	20	556	1.15038e-150	444.552	COG0286	HsdM	-	-	Type I restriction-modification system, DNA methylase subunit	[Defense mechanisms]
Q#746	EGY33370	multi-dom	223527	1	181	1.06271e-14	68.8023	COG0450	AhpC	-	-	Alkyl hydroperoxide reductase subunit AhpC (peroxiredoxin)	[Defense mechanisms]
Q#785	EGY32754	multi-dom	223527	22	147	0.000643192	37.2159	COG0450	AhpC	C	-	Alkyl hydroperoxide reductase subunit AhpC (peroxiredoxin)	[Defense mechanisms]
Q#1289	EGY34719	multi-dom	223527	7	132	1.00293e-15	70.3431	COG0450	AhpC	C	-	Alkyl hydroperoxide reductase subunit AhpC (peroxiredoxin)	[Defense mechanisms]
Q#1110	EGY35318	specific	223568	47	182	1.73098e-08	49.847	COG0494	MutT	-	cl00447	8-oxo-dGTP pyrophosphatase MutT and related house-cleaning NTP pyrophosphohydrolases, NUDIX family	[Defense mechanisms]
Q#1341	EGY33578	specific	223568	1	122	8.79328e-10	52.1582	COG0494	MutT	-	cl00447	8-oxo-dGTP pyrophosphatase MutT and related house-cleaning NTP pyrophosphohydrolases, NUDIX family	[Defense mechanisms]
Q#1452	EGY33793	specific	223568	53	201	9.52956e-08	48.3062	COG0494	MutT	-	cl00447	8-oxo-dGTP pyrophosphatase MutT and related house-cleaning NTP pyrophosphohydrolases, NUDIX family	[Defense mechanisms]
Q#1856	EGY33098	specific	223568	6	152	4.96452e-19	80.2777	COG0494	MutT	-	cl00447	8-oxo-dGTP pyrophosphatase MutT and related house-cleaning NTP pyrophosphohydrolases, NUDIX family	[Defense mechanisms]
Q#2087	EGY32826	multi-dom	223608	1	450	1.12853e-100	311.466	COG0534	NorM	-	-	Na+-driven multidrug efflux pump	[Defense mechanisms]
Q#331	EGY34428	multi-dom	223650	265	644	8.622e-44	161.822	COG0577	SalY	-	-	ABC-type antimicrobial peptide transport system, permease component	[Defense mechanisms]
Q#2050	EGY32795	multi-dom	223650	16	440	5.01794e-38	142.947	COG0577	SalY	-	-	ABC-type antimicrobial peptide transport system, permease component	[Defense mechanisms]
Q#589	EGY34892	multi-dom	223683	2	969	0	701.474	COG0610	COG0610	-	-	Type I site-specific restriction-modification system, R (restriction) subunit and related helicases ...	[Defense mechanisms]
Q#774	EGY33398	multi-dom	223683	38	143	1.4726e-15	73.5989	COG0610	COG0610	C	-	Type I site-specific restriction-modification system, R (restriction) subunit and related helicases ...	[Defense mechanisms]
Q#775	EGY33399	multi-dom	223683	75	622	1.25591e-60	217.664	COG0610	COG0610	N	-	Type I site-specific restriction-modification system, R (restriction) subunit and related helicases ...	[Defense mechanisms]
Q#1903	EGY33145	multi-dom	223683	1	551	1.77145e-111	357.491	COG0610	COG0610	N	-	Type I site-specific restriction-modification system, R (restriction) subunit and related helicases ...	[Defense mechanisms]
Q#1904	EGY33146	multi-dom	223683	49	455	4.47171e-104	333.223	COG0610	COG0610	C	-	Type I site-specific restriction-modification system, R (restriction) subunit and related helicases ...	[Defense mechanisms]
Q#1147	EGY35355	multi-dom	223700	1	275	7.14285e-107	315.537	COG0627	FrmB	-	-	S-formylglutathione hydrolase FrmB	[Defense mechanisms]
Q#593	EGY34896	multi-dom	223804	39	407	2.40667e-26	107.825	COG0732	HsdS	-	-	Restriction endonuclease S subunit	[Defense mechanisms]
Q#777	EGY33401	multi-dom	223804	9	381	3.4415e-20	89.7206	COG0732	HsdS	-	-	Restriction endonuclease S subunit	[Defense mechanisms]
Q#1905	EGY33147	multi-dom	223804	4	196	2.09401e-11	62.3714	COG0732	HsdS	C	-	Restriction endonuclease S subunit	[Defense mechanisms]
Q#1210	EGY35418	multi-dom	223911	2	1010	0	938.185	COG0841	AcrB	-	-	Multidrug efflux pump subunit AcrB	[Defense mechanisms]
Q#374	EGY34471	multi-dom	223912	609	909	1.12505e-27	114.259	COG0842	YadH	-	-	ABC-type multidrug transport system, permease component	[Defense mechanisms]
Q#375	EGY34472	multi-dom	223912	78	373	1.47922e-14	71.8868	COG0842	YadH	-	-	ABC-type multidrug transport system, permease component	[Defense mechanisms]
Q#374	EGY34471	multi-dom	224054	266	532	5.70014e-92	294.985	COG1131	CcmA	-	-	ABC-type multidrug transport system, ATPase component	[Defense mechanisms]
Q#253	EGY34350	multi-dom	224055	9	582	0	530.078	COG1132	MdlB	-	-	ABC-type multidrug transport system, ATPase and permease component	[Defense mechanisms]
Q#749	EGY33373	multi-dom	224055	7	550	5.66186e-131	396.414	COG1132	MdlB	-	-	ABC-type multidrug transport system, ATPase and permease component	[Defense mechanisms]
Q#1635	EGY34994	multi-dom	224055	26	607	3.4899e-145	435.319	COG1132	MdlB	-	-	ABC-type multidrug transport system, ATPase and permease component	[Defense mechanisms]
Q#1076	EGY34065	multi-dom	224124	87	697	7.98484e-54	198.452	COG1203	Cas3	-	-	CRISPR/Cas system-associated endonuclease/helicase Cas3	[Defense mechanisms]
Q#1380	EGY33617	multi-dom	224482	207	408	2.65362e-11	63.5021	COG1566	EmrA	N	-	Multidrug resistance efflux pump	[Defense mechanisms]
Q#2139	EGY32878	multi-dom	224482	11	347	8.96092e-125	367.039	COG1566	EmrA	-	-	Multidrug resistance efflux pump	[Defense mechanisms]
Q#672	EGY32435	specific	224608	3	103	1.82822e-27	102.809	COG1694	MazG	-	cl16941	NTP pyrophosphatase, house-cleaning of non-canonical NTPs	[Defense mechanisms]
Q#672	EGY32435	specific	224608	172	230	0.00014158	38.8655	COG1694	MazG	N	cl16941	NTP pyrophosphatase, house-cleaning of non-canonical NTPs	[Defense mechanisms]
Q#460	EGY34557	specific	224937	1	89	1.448e-16	68.8309	COG2026	RelE	-	cl21503	mRNA-degrading endonuclease RelE, toxin component of the RelBE toxin-antitoxin system	[Defense mechanisms]
Q#1408	EGY33645	specific	224937	1	90	7.31408e-19	74.9941	COG2026	RelE	-	cl21503	mRNA-degrading endonuclease RelE, toxin component of the RelBE toxin-antitoxin system	[Defense mechanisms]
Q#567	EGY34870	specific	224987	1	105	2.88182e-27	97.6038	COG2076	EmrE	-	cl00910	Multidrug transporter EmrE and related cation transporters	[Defense mechanisms]
Q#1267	EGY33456	specific	224987	1	106	3.97247e-26	94.9074	COG2076	EmrE	-	cl00910	Multidrug transporter EmrE and related cation transporters	[Defense mechanisms]
Q#57	EGY34154	specific	225072	1	77	5.28601e-16	67.027	COG2161	StbD	-	cl09153	Antitoxin component YafN of the YafNO toxin-antitoxin module, PHD/YefM family	[Defense mechanisms]
Q#459	EGY34556	non-specific	225072	4	72	4.87627e-07	42.3743	COG2161	StbD	-	cl09153	Antitoxin component YafN of the YafNO toxin-antitoxin module, PHD/YefM family	[Defense mechanisms]
Q#1407	EGY33644	non-specific	225072	5	85	0.000139999	35.4407	COG2161	StbD	-	cl09153	Antitoxin component YafN of the YafNO toxin-antitoxin module, PHD/YefM family	[Defense mechanisms]
Q#1450	EGY33791	non-specific	225162	34	177	7.6223e-07	47.91	COG2253	COG2253	C	cl00973	Predicted nucleotidyltransferase component of viral defense system	[Defense mechanisms]
Q#121	EGY34218	multi-dom	225183	16	292	4.31107e-33	128.885	COG2274	SunT	NC	-	ABC-type bacteriocin/lantibiotic exporters, contain an N-terminal double-glycine peptidase domain	[Defense mechanisms]
Q#1298	EGY34728	multi-dom	225183	1	130	5.01046e-41	144.678	COG2274	SunT	N	-	ABC-type bacteriocin/lantibiotic exporters, contain an N-terminal double-glycine peptidase domain	[Defense mechanisms]
Q#1379	EGY33616	multi-dom	225183	3	705	0	788.347	COG2274	SunT	-	-	ABC-type bacteriocin/lantibiotic exporters, contain an N-terminal double-glycine peptidase domain	[Defense mechanisms]
Q#1817	EGY33059	non-specific	225322	334	422	0.00164733	39.2713	COG2602	YbxI	NC	cl21491	Beta-lactamase class D	[Defense mechanisms]
Q#1321	EGY34751	specific	225466	3	97	1.30422e-47	149.066	COG2914	PasI	-	cl00155	Putative antitoxin component PasI (RatB) of the RatAB toxin-antitoxin module, ubiquitin-RnfH superfamily	[Defense mechanisms]
Q#222	EGY34319	non-specific	225619	1	86	1.76416e-14	63.1265	COG3077	RelB	-	cl01171	Antitoxin component of the RelBE or YafQ-DinJ toxin-antitoxin module	[Defense mechanisms]
Q#2027	EGY32332	non-specific	225619	4	65	1.6892e-09	48.8741	COG3077	RelB	C	cl01171	Antitoxin component of the RelBE or YafQ-DinJ toxin-antitoxin module	[Defense mechanisms]
Q#335	EGY34432	non-specific	225635	1	89	3.63474e-26	94.3533	COG3093	VapI	-	cl22854	Plasmid maintenance system antidote protein VapI, contains XRE-type HTH domain	[Defense mechanisms]
Q#407	EGY34504	specific	225635	1	86	7.56313e-29	101.287	COG3093	VapI	-	cl22854	Plasmid maintenance system antidote protein VapI, contains XRE-type HTH domain	[Defense mechanisms]
Q#1073	EGY34062	specific	225635	10	91	4.1593e-35	117.465	COG3093	VapI	-	cl22854	Plasmid maintenance system antidote protein VapI, contains XRE-type HTH domain	[Defense mechanisms]
Q#334	EGY34431	non-specific	226079	14	104	6.76702e-28	98.9963	COG3549	HigB	-	cl21503	Plasmid maintenance system killer protein	[Defense mechanisms]
Q#406	EGY34503	non-specific	226079	1	92	6.27925e-29	100.922	COG3549	HigB	-	cl21503	Plasmid maintenance system killer protein	[Defense mechanisms]
Q#1074	EGY34063	non-specific	226079	7	98	1.84383e-24	89.7515	COG3549	HigB	-	cl21503	Plasmid maintenance system killer protein	[Defense mechanisms]
Q#150	EGY34247	non-specific	226175	1	285	3.84111e-46	158.212	COG3649	Csh2	-	cl01465	CRISPR/Cas system type I-B associated protein Csh2, Cas7 group, RAMP superfamily	[Defense mechanisms]
Q#118	EGY34215	specific	226183	1	97	1.20889e-34	116.335	COG3657	COG3657	-	cl21503	Putative component of the toxin-antitoxin plasmid stabilization module	[Defense mechanisms]
Q#1084	EGY34073	specific	226183	4	98	9.69901e-32	109.016	COG3657	COG3657	-	cl21503	Putative component of the toxin-antitoxin plasmid stabilization module	[Defense mechanisms]
Q#2084	EGY32823	specific	226183	2	85	4.34926e-39	127.12	COG3657	COG3657	-	cl21503	Putative component of the toxin-antitoxin plasmid stabilization module	[Defense mechanisms]
Q#56	EGY34153	specific	226600	1	84	2.86224e-36	119.433	COG4115	COG4115	-	cl21503	Toxin component of the Txe-Axe toxin-antitoxin module, Txe/YoeB family	[Defense mechanisms]
Q#539	EGY34842	multi-dom	226638	1	321	1.23911e-139	401.024	COG4168	SapB	-	-	ABC-type antimicrobial peptide transport system, permease component	[Defense mechanisms]
Q#538	EGY34841	multi-dom	226640	1	295	9.72928e-145	411.837	COG4171	SapC	-	-	ABC-type antimicrobial peptide transport system, permease component	[Defense mechanisms]
Q#566	EGY34869	multi-dom	223980	1	314	1.20075e-116	342.29	COG1052	LdhA	-	-	Lactate dehydrogenase or related 2-hydroxyacid dehydrogenase	[Energy production and conversion, Coenzyme transport and metabolism, General function prediction only]
Q#822	EGY32699	multi-dom	223980	7	336	2.66802e-136	393.136	COG1052	LdhA	-	-	Lactate dehydrogenase or related 2-hydroxyacid dehydrogenase	[Energy production and conversion, Coenzyme transport and metabolism, General function prediction only]
Q#1508	EGY32626	specific	223299	1	175	3.26664e-82	243.299	COG0221	Ppa	-	cl00217	Inorganic pyrophosphatase	[Energy production and conversion, Inorganic ion transport and metabolism]
Q#36	EGY34133	multi-dom	223724	4	485	2.79917e-64	218.761	COG0651	HyfB	-	-	Formate hydrogenlyase subunit 3/Multisubunit Na+/H+ antiporter, MnhD subunit	[Energy production and conversion, Inorganic ion transport and metabolism]
Q#40	EGY34137	multi-dom	223724	7	498	7.54138e-86	280.778	COG0651	HyfB	-	-	Formate hydrogenlyase subunit 3/Multisubunit Na+/H+ antiporter, MnhD subunit	[Energy production and conversion, Inorganic ion transport and metabolism]
Q#38	EGY34135	multi-dom	223941	5	431	5.63686e-93	296.515	COG1009	NuoL	C	-	NADH:ubiquinone oxidoreductase subunit 5 (chain L)/Multisubunit Na+/H+ antiporter, MnhA subunit	[Energy production and conversion, Inorganic ion transport and metabolism]
Q#1429	EGY33770	specific	225549	1	386	0	516.867	COG3004	NhaA	-	cl01133	Na+/H+ antiporter NhaA	[Energy production and conversion, Inorganic ion transport and metabolism]
Q#1564	EGY33692	specific	225585	13	149	1.28552e-72	216.943	COG3043	NapB	-	cl01153	Nitrate reductase cytochrome c-type subunit	[Energy production and conversion, Inorganic ion transport and metabolism]
Q#1942	EGY33184	specific	225609	1	514	0	816.695	COG3067	NhaB	-	cl21473	Na+/H+ antiporter NhaB	[Energy production and conversion, Inorganic ion transport and metabolism]
Q#1218	EGY33510	multi-dom	224223	8	381	4.52507e-144	416.302	COG1304	LldD	-	-	FMN-dependent dehydrogenase, includes L-lactate dehydrogenase and type II isopentenyl diphosphate isomerase	[Energy production and conversion, Lipid transport and metabolism, General function prediction only]
Q#288	EGY34385	specific	223856	6	208	7.95409e-38	132.053	COG0785	CcdA	-	cl21514	Cytochrome c biogenesis protein CcdA	[Energy production and conversion, Posttranslational modification, protein turnover, chaperones]
Q#827	EGY32704	specific	223856	175	395	6.12203e-17	79.6656	COG0785	CcdA	-	cl21514	Cytochrome c biogenesis protein CcdA	[Energy production and conversion, Posttranslational modification, protein turnover, chaperones]
Q#1961	EGY33203	specific	224061	1	644	0	802.735	COG1138	CcmF	-	cl00504	Cytochrome c biogenesis factor	[Energy production and conversion, Posttranslational modification, protein turnover, chaperones]
Q#1974	EGY33216	specific	224061	1	625	0	628.24	COG1138	CcmF	-	cl00504	Cytochrome c biogenesis factor	[Energy production and conversion, Posttranslational modification, protein turnover, chaperones]
Q#1960	EGY33202	specific	225211	1	166	4.4371e-77	229.529	COG2332	CcmE	-	cl00994	Cytochrome c-type biogenesis protein CcmE	[Energy production and conversion, Posttranslational modification, protein turnover, chaperones]
Q#1063	EGY34052	non-specific	225600	1	305	5.28655e-141	403.4	COG3058	FdhE	-	cl19312	Formate dehydrogenase maturation protein FdhE	[Energy production and conversion, Posttranslational modification, protein turnover, chaperones]
Q#1963	EGY33205	specific	225630	1	146	8.53416e-63	192.184	COG3088	NrfF	-	cl01179	Cytochrome c-type biogenesis protein CcmH/NrfF	[Energy production and conversion, Posttranslational modification, protein turnover, chaperones]
Q#1976	EGY33218	specific	225630	4	103	1.40757e-46	157.516	COG3088	NrfF	C	cl01179	Cytochrome c-type biogenesis protein CcmH/NrfF	[Energy production and conversion, Posttranslational modification, protein turnover, chaperones]
Q#1964	EGY33206	multi-dom	226687	1	297	2.7295e-86	263.083	COG4235	NrfG	-	-	Cytochrome c-type biogenesis protein CcmH/NrfG	[Energy production and conversion, Posttranslational modification, protein turnover, chaperones]
Q#1976	EGY33218	multi-dom	226687	136	356	9.60561e-48	164.857	COG4235	NrfG	N	-	Cytochrome c-type biogenesis protein CcmH/NrfG	[Energy production and conversion, Posttranslational modification, protein turnover, chaperones]
Q#88	EGY34185	multi-dom	227320	1	577	0	684.06	COG4987	CydC	-	-	ABC-type transport system involved in cytochrome bd biosynthesis, fused ATPase and permease components	[Energy production and conversion, Posttranslational modification, protein turnover, chaperones]
Q#89	EGY34186	multi-dom	227321	23	583	0	658.568	COG4988	CydD	-	-	ABC-type transport system involved in cytochrome bd biosynthesis, ATPase and permease components	[Energy production and conversion, Posttranslational modification, protein turnover, chaperones]
Q#750	EGY33374	multi-dom	227321	17	571	0	652.02	COG4988	CydD	-	-	ABC-type transport system involved in cytochrome bd biosynthesis, ATPase and permease components	[Energy production and conversion, Posttranslational modification, protein turnover, chaperones]
Q#1044	EGY34033	multi-dom	223117	1	310	5.6638e-84	258.252	COG0039	Mdh	-	-	Malate/lactate dehydrogenase	[Energy production and conversion]
Q#1251	EGY33543	multi-dom	223123	1	387	0	549.896	COG0045	SucC	-	-	Succinyl-CoA synthetase, beta subunit	[Energy production and conversion]
Q#771	EGY33395	multi-dom	223133	1	457	0	953.984	COG0055	AtpD	-	-	FoF1-type ATP synthase, beta subunit	[Energy production and conversion]
Q#769	EGY33393	multi-dom	223134	1	513	0	920.831	COG0056	AtpA	-	-	FoF1-type ATP synthase, alpha subunit	[Energy production and conversion]
Q#1252	EGY33544	multi-dom	223152	1	290	4.92165e-176	490.947	COG0074	SucD	-	-	Succinyl-CoA synthetase, alpha subunit	[Energy production and conversion]
Q#2122	EGY32861	multi-dom	223192	1	462	0	885.024	COG0114	FumC	-	-	Fumarate hydratase class II	[Energy production and conversion]
Q#770	EGY33394	specific	223302	5	289	3.04218e-147	417.776	COG0224	AtpG	-	cl00365	FoF1-type ATP synthase, gamma subunit	[Energy production and conversion]
Q#754	EGY33378	multi-dom	223318	10	338	2.38719e-171	482.454	COG0240	GpsA	-	-	Glycerol-3-phosphate dehydrogenase	[Energy production and conversion]
Q#46	EGY34143	multi-dom	223321	1	806	3.84557e-112	361.809	COG0243	BisC	N	-	Anaerobic selenocysteine-containing dehydrogenase	[Energy production and conversion]
Q#47	EGY34144	multi-dom	223321	2	173	4.50044e-28	111.045	COG0243	BisC	C	-	Anaerobic selenocysteine-containing dehydrogenase	[Energy production and conversion]
Q#454	EGY34551	multi-dom	223321	9	809	0	669.199	COG0243	BisC	-	-	Anaerobic selenocysteine-containing dehydrogenase	[Energy production and conversion]
Q#1130	EGY35338	multi-dom	223321	3	193	1.53765e-59	198.87	COG0243	BisC	N	-	Anaerobic selenocysteine-containing dehydrogenase	[Energy production and conversion]
Q#1131	EGY35339	multi-dom	223321	6	573	3.0978e-159	477.755	COG0243	BisC	C	-	Anaerobic selenocysteine-containing dehydrogenase	[Energy production and conversion]
Q#1560	EGY33688	multi-dom	223321	2	828	0	649.554	COG0243	BisC	-	-	Anaerobic selenocysteine-containing dehydrogenase	[Energy production and conversion]
Q#788	EGY32757	multi-dom	223325	573	1028	4.75174e-68	233.297	COG0247	GlpC	-	-	Fe-S oxidoreductase	[Energy production and conversion]
Q#788	EGY32757	multi-dom	223354	30	548	1.62387e-94	309.903	COG0277	GlcD	-	-	FAD/FMN-containing dehydrogenase	[Energy production and conversion]
Q#260	EGY34357	specific	223357	391	711	2.22028e-158	463.631	COG0280	Pta	-	cl17212	Phosphotransacetylase	[Energy production and conversion]
Q#1952	EGY33194	specific	223357	277	601	2.22095e-126	377.731	COG0280	Pta	-	cl17212	Phosphotransacetylase	[Energy production and conversion]
Q#1952	EGY33194	multi-dom	223358	1	280	1.05077e-130	392.708	COG0281	SfcA	N	-	Malic enzyme	[Energy production and conversion]
Q#1953	EGY33195	multi-dom	223358	1	129	2.54285e-69	217.443	COG0281	SfcA	C	-	Malic enzyme	[Energy production and conversion]
Q#261	EGY34358	specific	223359	4	399	0	604.573	COG0282	AckA	-	cl17037	Acetate kinase	[Energy production and conversion]
Q#1563	EGY33691	multi-dom	223425	17	283	1.11297e-67	217.712	COG0348	NapH	C	-	Polyferredoxin	[Energy production and conversion]
Q#772	EGY33396	multi-dom	223432	1	134	4.47208e-52	163.593	COG0355	AtpC	-	-	FoF1-type ATP synthase, epsilon subunit	[Energy production and conversion]
Q#765	EGY33389	specific	223433	3	258	1.21528e-72	224.838	COG0356	AtpB	-	cl00413	FoF1-type ATP synthase, membrane subunit a	[Energy production and conversion]
Q#413	EGY34510	specific	223451	4	569	0	712.643	COG0374	HyaB	-	cl21493	Ni,Fe-hydrogenase I large subunit	[Energy production and conversion]
Q#172	EGY34269	multi-dom	223503	4	89	1.36723e-06	45.7561	COG0426	NorV	N	-	Flavorubredoxin	[Energy production and conversion]
Q#45	EGY34142	multi-dom	223514	20	239	1.02287e-83	253.512	COG0437	HybA	-	-	Fe-S-cluster-containing dehydrogenase component	[Energy production and conversion]
Q#1129	EGY35337	multi-dom	223514	1	201	1.28333e-75	228.859	COG0437	HybA	-	-	Fe-S-cluster-containing dehydrogenase component	[Energy production and conversion]
Q#1969	EGY33211	multi-dom	223514	31	225	2.64712e-79	238.874	COG0437	HybA	-	-	Fe-S-cluster-containing dehydrogenase component	[Energy production and conversion]
Q#1440	EGY33781	multi-dom	223555	6	250	5.87067e-117	337.336	COG0479	FrdB	-	-	Succinate dehydrogenase/fumarate reductase, Fe-S protein subunit	[Energy production and conversion]
Q#269	EGY34366	multi-dom	223582	105	529	6.25791e-140	412.946	COG0508	AceF	-	-	Pyruvate/2-oxoglutarate dehydrogenase complex, dihydrolipoamide acyltransferase (E2) component	[Energy production and conversion]
Q#1250	EGY33542	multi-dom	223582	1	406	6.13374e-173	492.682	COG0508	AceF	-	-	Pyruvate/2-oxoglutarate dehydrogenase complex, dihydrolipoamide acyltransferase (E2) component	[Energy production and conversion]
Q#1618	EGY34977	multi-dom	223620	6	222	1.61539e-72	222.329	COG0546	Gph	-	-	Phosphoglycolate phosphatase, HAD superfamily	[Energy production and conversion]
Q#1249	EGY33541	multi-dom	223641	33	962	0	1565.33	COG0567	SucA	-	-	2-oxoglutarate dehydrogenase complex, dehydrogenase (E1) component, and related enzymes	[Energy production and conversion]
Q#296	EGY34393	multi-dom	223651	14	522	2.89728e-161	472.147	COG0578	GlpA	-	-	Glycerol-3-phosphate dehydrogenase	[Energy production and conversion]
Q#760	EGY33384	multi-dom	223651	1	36	0.00106061	40.7239	COG0578	GlpA	C	-	Glycerol-3-phosphate dehydrogenase	[Energy production and conversion]
Q#585	EGY34888	specific	223706	20	81	4.79466e-17	70.177	COG0633	Fdx	N	cl00159	Ferredoxin	[Energy production and conversion]
Q#1682	EGY35165	specific	223706	1	104	5.77212e-25	91.7482	COG0633	Fdx	-	cl00159	Ferredoxin	[Energy production and conversion]
Q#766	EGY33390	specific	223709	1	78	1.82555e-09	49.1774	COG0636	AtpE	-	cl00466	FoF1-type ATP synthase, membrane subunit c/Archaeal/vacuolar-type H+-ATPase, subunit K	[Energy production and conversion]
Q#35	EGY34132	specific	223722	180	544	2.64461e-93	294.114	COG0649	NuoD	-	cl21493	NADH:ubiquinone oxidoreductase 49 kD subunit (chain D)	[Energy production and conversion]
Q#39	EGY34136	specific	223723	14	318	2.57414e-67	215.248	COG0650	HyfC	-	cl00469	Formate hydrogenlyase subunit 4	[Energy production and conversion]
Q#414	EGY34511	specific	223752	1	154	1.71311e-35	122.43	COG0680	HyaD	-	cl00477	Ni,Fe-hydrogenase maturation factor	[Energy production and conversion]
Q#1256	EGY33548	specific	223752	7	150	1.56536e-24	93.5397	COG0680	HyaD	-	cl00477	Ni,Fe-hydrogenase maturation factor	[Energy production and conversion]
Q#767	EGY33391	multi-dom	223783	1	135	3.02613e-19	78.8795	COG0711	AtpF	-	-	FoF1-type ATP synthase, membrane subunit b or b'	[Energy production and conversion]
Q#768	EGY33392	specific	223784	1	181	4.88046e-60	187.063	COG0712	AtpH	-	cl17210	FoF1-type ATP synthase, delta subunit	[Energy production and conversion]
Q#172	EGY34269	specific	223788	1	168	8.16632e-48	154.461	COG0716	FldA	-	cl00438	Flavodoxin	[Energy production and conversion]
Q#759	EGY33383	specific	223788	4	147	4.02094e-32	113.245	COG0716	FldA	-	cl00438	Flavodoxin	[Energy production and conversion]
Q#271	EGY34368	specific	223849	1	173	5.44409e-22	88.8448	COG0778	NfnB	-	cl00514	Nitroreductase	[Energy production and conversion]
Q#1666	EGY35025	specific	223849	1	177	2.34123e-28	105.794	COG0778	NfnB	-	cl00514	Nitroreductase	[Energy production and conversion]
Q#1667	EGY35026	specific	223849	7	38	3.17615e-05	37.6133	COG0778	NfnB	C	cl00514	Nitroreductase	[Energy production and conversion]
Q#2118	EGY32857	specific	223849	11	187	6.38519e-34	122.742	COG0778	NfnB	-	cl00514	Nitroreductase	[Energy production and conversion]
Q#1392	EGY33629	specific	223944	6	487	2.39428e-142	420.549	COG1012	AdhE	-	cl11961	Acyl-CoA reductase or other NAD-dependent aldehyde dehydrogenase	[Energy production and conversion]
Q#1398	EGY33635	specific	223944	12	456	2.28952e-69	238.735	COG1012	AdhE	-	cl11961	Acyl-CoA reductase or other NAD-dependent aldehyde dehydrogenase	[Energy production and conversion]
Q#303	EGY34400	multi-dom	223949	10	259	2.70978e-50	167.845	COG1018	Fpr	-	-	Ferredoxin-NADP reductase	[Energy production and conversion]
Q#1439	EGY33780	multi-dom	223981	30	571	0	640.568	COG1053	SdhA	-	-	Succinate dehydrogenase/fumarate reductase, flavoprotein subunit	[Energy production and conversion]
Q#1249	EGY33541	non-specific	223997	381	496	2.06165e-06	49.5633	COG1071	AcoA	NC	cl01629	TPP-dependent pyruvate or acetoin dehydrogenase subunit alpha	[Energy production and conversion]
Q#45	EGY34142	non-specific	224064	132	186	0.00955341	33.5254	COG1141	Fer	-	cl19102	Ferredoxin	[Energy production and conversion]
Q#41	EGY34138	multi-dom	224065	1	190	5.65393e-50	161.504	COG1142	HycB	-	-	Fe-S-cluster-containing hydrogenase component 2	[Energy production and conversion]
Q#411	EGY34508	multi-dom	224065	39	224	1.87926e-20	86.005	COG1142	HycB	-	-	Fe-S-cluster-containing hydrogenase component 2	[Energy production and conversion]
Q#34	EGY34131	multi-dom	224066	1	135	1.45704e-36	127.55	COG1143	NuoI	-	-	Formate hydrogenlyase subunit 6/NADH:ubiquinone oxidoreductase 23 kD subunit (chain I)	[Energy production and conversion]
Q#1562	EGY33690	multi-dom	224068	38	126	1.58406e-08	50.6844	COG1145	NapF	-	-	Ferredoxin	[Energy production and conversion]
Q#1130	EGY35338	non-specific	224075	103	152	0.000674068	37.0164	COG1153	FwdD	NC	cl09929	Formylmethanofuran dehydrogenase subunit D	[Energy production and conversion]
Q#1560	EGY33688	non-specific	224075	743	827	0.000164057	40.8684	COG1153	FwdD	N	cl09929	Formylmethanofuran dehydrogenase subunit D	[Energy production and conversion]
Q#298	EGY34395	specific	224103	1	193	1.70878e-77	233.298	COG1182	AzoR	-	cl00438	FMN-dependent NADH-azoreductase	[Energy production and conversion]
Q#270	EGY34367	multi-dom	224169	3	456	0	561.445	COG1249	Lpd	-	-	Pyruvate/2-oxoglutarate dehydrogenase complex, dihydrolipoamide dehydrogenase (E3) component or related enzyme	[Energy production and conversion]
Q#1188	EGY35396	multi-dom	224169	22	456	3.24481e-171	492.109	COG1249	Lpd	-	-	Pyruvate/2-oxoglutarate dehydrogenase complex, dihydrolipoamide dehydrogenase (E3) component or related enzyme	[Energy production and conversion]
Q#297	EGY34394	multi-dom	224172	1	434	6.21637e-139	407.406	COG1252	Ndh	-	-	NADH dehydrogenase, FAD-containing subunit	[Energy production and conversion]
Q#42	EGY34139	non-specific	224174	1	92	3.05128e-11	61.0511	COG1254	AcyP	-	cl00551	Acylphosphatase	[Energy production and conversion]
Q#132	EGY34229	specific	224174	1	89	5.8326e-28	98.4154	COG1254	AcyP	-	cl00551	Acylphosphatase	[Energy production and conversion]
Q#1348	EGY33585	specific	224190	1	520	0	568.422	COG1271	AppC	-	cl00562	Cytochrome bd-type quinol oxidase, subunit 1	[Energy production and conversion]
Q#238	EGY34335	specific	224201	1	474	0	733.785	COG1282	PntB	-	cl22917	NAD/NADP transhydrogenase beta subunit	[Energy production and conversion]
Q#1349	EGY33586	multi-dom	224213	1	373	2.51148e-122	360.016	COG1294	AppB	-	-	Cytochrome bd-type quinol oxidase, subunit 2	[Energy production and conversion]
Q#653	EGY32416	specific	224266	1	209	2.22312e-121	345.553	COG1347	NqrD	-	cl00597	Na+-transporting NADH:ubiquinone oxidoreductase, subunit NqrD	[Energy production and conversion]
Q#431	EGY34528	specific	224278	1	84	1.11577e-25	93.191	COG1359	YgiN	-	cl10022	Quinol monooxygenase YgiN	[Energy production and conversion]
Q#1758	EGY33000	specific	224278	132	219	1.15404e-13	63.9158	COG1359	YgiN	-	cl10022	Quinol monooxygenase YgiN	[Energy production and conversion]
Q#1758	EGY33000	non-specific	224278	21	115	6.44772e-07	45.4262	COG1359	YgiN	-	cl10022	Quinol monooxygenase YgiN	[Energy production and conversion]
Q#2005	EGY33247	specific	224278	1	95	8.59729e-25	90.4946	COG1359	YgiN	-	cl10022	Quinol monooxygenase YgiN	[Energy production and conversion]
Q#1398	EGY33635	specific	224371	462	865	1.77781e-158	471.312	COG1454	EutG	-	cl02872	Alcohol dehydrogenase, class IV	[Energy production and conversion]
Q#48	EGY34145	specific	224443	29	270	6.27915e-117	339.278	COG1526	FdhD	-	cl00659	Formate dehydrogenase assembly factor FdhD	[Energy production and conversion]
Q#1217	EGY33509	specific	224535	1	510	6.79213e-139	414.72	COG1620	LldP	-	cl00701	L-lactate permease	[Energy production and conversion]
Q#650	EGY32413	multi-dom	224640	1	446	0	822.817	COG1726	NqrA	-	-	Na+-transporting NADH:ubiquinone oxidoreductase, subunit NqrA	[Energy production and conversion]
Q#410	EGY34507	multi-dom	224654	12	356	3.92586e-144	416.439	COG1740	HyaA	-	-	Ni,Fe-hydrogenase I small subunit	[Energy production and conversion]
Q#489	EGY34586	multi-dom	224671	6	500	1.051e-85	274.941	COG1757	NhaC	-	-	Na+/H+ antiporter NhaC	[Energy production and conversion]
Q#926	EGY32563	multi-dom	224671	13	407	1.78605e-84	268.392	COG1757	NhaC	-	-	Na+/H+ antiporter NhaC	[Energy production and conversion]
Q#651	EGY32414	specific	224718	2	406	0	563.614	COG1805	NqrB	-	cl00779	Na+-transporting NADH:ubiquinone oxidoreductase, subunit NqrB	[Energy production and conversion]
Q#705	EGY32468	specific	224779	10	538	0	926.762	COG1866	PckA	-	cl22860	Phosphoenolpyruvate carboxykinase, ATP-dependent	[Energy production and conversion]
Q#1386	EGY33623	non-specific	224792	220	263	0.00205428	38.2368	COG1880	CdhB	C	cl22435	CO dehydrogenase/acetyl-CoA synthase epsilon subunit	[Energy production and conversion]
Q#1993	EGY33235	multi-dom	224794	65	126	5.92363e-29	110.514	COG1882	PflD	N	-	Pyruvate-formate lyase	[Energy production and conversion]
Q#2004	EGY33246	multi-dom	224794	8	768	0	1226.82	COG1882	PflD	-	-	Pyruvate-formate lyase	[Energy production and conversion]
Q#422	EGY34519	specific	224795	1	431	0	516.928	COG1883	OadB	-	cl00816	Na+-transporting methylmalonyl-CoA/oxaloacetate decarboxylase, beta subunit	[Energy production and conversion]
Q#33	EGY34130	multi-dom	224852	78	159	1.5953e-05	43.9072	COG1941	FrhG	NC	-	Coenzyme F420-reducing hydrogenase, gamma subunit	[Energy production and conversion]
Q#2046	EGY32791	multi-dom	224921	14	101	1.29067e-05	39.9861	COG2010	CccA	N	-	Cytochrome c, mono- and diheme variants	[Energy production and conversion]
Q#654	EGY32417	specific	225119	1	198	2.88721e-104	301.259	COG2209	NqrE	-	cl00597	Na+-transporting NADH:ubiquinone oxidoreductase, subunit NqrE	[Energy production and conversion]
Q#1129	EGY35337	non-specific	225289	67	111	0.000237244	37.7555	COG2440	FixX	NC	cl19102	Ferredoxin-like protein FixX	[Energy production and conversion]
Q#1969	EGY33211	non-specific	225289	94	139	0.00994849	33.1331	COG2440	FixX	NC	cl19102	Ferredoxin-like protein FixX	[Energy production and conversion]
Q#268	EGY34365	multi-dom	225329	1	885	0	1641.32	COG2609	AceE	-	-	Pyruvate dehydrogenase complex, dehydrogenase (E1) component	[Energy production and conversion]
Q#2046	EGY32791	non-specific	225418	1	102	9.24078e-16	67.8082	COG2863	CytC553	-	cl21467	Cytochrome c553	[Energy production and conversion]
Q#44	EGY34141	specific	225419	10	219	2.47574e-85	255.351	COG2864	FdnI	-	cl00859	Cytochrome b subunit of formate dehydrogenase	[Energy production and conversion]
Q#652	EGY32415	multi-dom	225424	1	260	3.31139e-113	329.001	COG2869	NqrC	-	-	Na+-transporting NADH:ubiquinone oxidoreductase, subunit NqrC	[Energy production and conversion]
Q#1051	EGY34040	multi-dom	225424	102	203	0.000219412	39.7164	COG2869	NqrC	N	-	Na+-transporting NADH:ubiquinone oxidoreductase, subunit NqrC	[Energy production and conversion]
Q#585	EGY34888	multi-dom	225426	20	82	4.16243e-06	42.1026	COG2871	NqrF	C	-	Na+-transporting NADH:ubiquinone oxidoreductase, subunit NqrF	[Energy production and conversion]
Q#655	EGY32418	multi-dom	225426	2	411	0	763.581	COG2871	NqrF	-	-	Na+-transporting NADH:ubiquinone oxidoreductase, subunit NqrF	[Energy production and conversion]
Q#1682	EGY35165	multi-dom	225426	23	102	2.56706e-08	49.8066	COG2871	NqrF	C	-	Na+-transporting NADH:ubiquinone oxidoreductase, subunit NqrF	[Energy production and conversion]
Q#1048	EGY34037	multi-dom	225433	1	191	2.05386e-89	263.549	COG2878	RnfB	-	-	Na+-translocating ferredoxin:NAD+ oxidoreductase RNF, RnfB subunit	[Energy production and conversion]
Q#453	EGY34550	specific	225550	1	178	1.14384e-77	239.618	COG3005	NapC	-	cl21553	Tetraheme cytochrome c subunit of nitrate or TMAO reductase	[Energy production and conversion]
Q#1565	EGY33693	specific	225550	8	196	6.64652e-98	285.456	COG3005	NapC	-	cl21553	Tetraheme cytochrome c subunit of nitrate or TMAO reductase	[Energy production and conversion]
Q#1441	EGY33782	non-specific	225573	6	130	2.18958e-40	132.967	COG3029	FrdC	-	cl00881	Fumarate reductase subunit C	[Energy production and conversion]
Q#2068	EGY35126	multi-dom	225593	1	500	0	954.964	COG3051	CitF	-	-	Citrate lyase, alpha subunit	[Energy production and conversion]
Q#2070	EGY35128	non-specific	225594	1	95	4.49701e-40	129.863	COG3052	CitD	-	cl06082	Citrate lyase, gamma subunit	[Energy production and conversion]
Q#1630	EGY34989	multi-dom	225595	11	66	0.00742329	34.6917	COG3053	CitC	NC	-	Citrate lyase synthetase	[Energy production and conversion]
Q#2071	EGY35129	multi-dom	225595	65	401	0	521.584	COG3053	CitC	-	-	Citrate lyase synthetase	[Energy production and conversion]
Q#224	EGY34321	multi-dom	225611	1	444	3.86172e-153	445.735	COG3069	DcuC	-	-	C4-dicarboxylate transporter	[Energy production and conversion]
Q#1442	EGY33783	specific	225622	1	114	4.1036e-40	131.397	COG3080	FrdD	-	cl00881	Fumarate reductase subunit D	[Energy production and conversion]
Q#33	EGY34130	specific	225799	29	173	2.227e-79	238.422	COG3260	HycG	-	cl17194	Ni,Fe-hydrogenase III small subunit	[Energy production and conversion]
Q#35	EGY34132	multi-dom	225800	181	558	0	527.285	COG3261	HycE2	-	-	Ni,Fe-hydrogenase III large subunit	[Energy production and conversion]
Q#413	EGY34510	multi-dom	225800	15	106	7.95887e-12	65.8161	COG3261	HycE2	C	-	Ni,Fe-hydrogenase III large subunit	[Energy production and conversion]
Q#35	EGY34132	specific	225801	15	175	1.40333e-67	218.469	COG3262	HycE1	-	cl19197	Ni,Fe-hydrogenase III component G	[Energy production and conversion]
Q#237	EGY34334	multi-dom	225826	3	365	0	546.599	COG3288	PntA	-	-	NAD/NADP transhydrogenase alpha subunit	[Energy production and conversion]
Q#1128	EGY35336	specific	225839	6	279	6.39936e-74	229.902	COG3302	DmsC	-	cl21513	DMSO reductase anchor subunit	[Energy production and conversion]
Q#764	EGY33388	non-specific	225849	1	123	1.62069e-15	67.7768	COG3312	AtpI	-	cl09170	FoF1-type ATP synthase assembly protein I	[Energy production and conversion]
Q#420	EGY34517	specific	226157	1	85	7.68386e-25	90.1657	COG3630	OadG	-	cl01458	Na+-transporting methylmalonyl-CoA/oxaloacetate decarboxylase, gamma subunit	[Energy production and conversion]
Q#1337	EGY33574	multi-dom	226591	58	159	2.79875e-08	51.9957	COG4106	Tam	C	-	Trans-aconitate methyltransferase	[Energy production and conversion]
Q#425	EGY34522	multi-dom	226674	4	243	9.1884e-126	360.029	COG4221	YdfG	-	-	NADP-dependent 3-hydroxy acid dehydrogenase YdfG	[Energy production and conversion]
Q#1151	EGY35359	multi-dom	226674	1	249	1.05291e-100	296.086	COG4221	YdfG	-	-	NADP-dependent 3-hydroxy acid dehydrogenase YdfG	[Energy production and conversion]
Q#37	EGY34134	non-specific	226688	3	212	2.44754e-36	128.373	COG4237	HyfE	-	cl17899	Hydrogenase-4 membrane subunit HyfE	[Energy production and conversion]
Q#1049	EGY34038	multi-dom	227003	11	546	0	757.674	COG4656	RnfC	-	-	Na+-translocating ferredoxin:NAD+ oxidoreductase RNF, RnfC subunit	[Energy production and conversion]
Q#1047	EGY34036	specific	227004	1	193	4.52713e-95	277.34	COG4657	RnfA	-	cl00597	Na+-translocating ferredoxin:NAD+ oxidoreductase RNF, RnfA subunit	[Energy production and conversion]
Q#1050	EGY34039	specific	227005	1	358	2.62512e-139	402.545	COG4658	RnfD	-	cl00779	Na+-translocating ferredoxin:NAD+ oxidoreductase RNF, RnfD subunit	[Energy production and conversion]
Q#1051	EGY34040	specific	227006	5	197	1.47314e-74	225.729	COG4659	RnfG	-	cl01081	Na+-translocating ferredoxin:NAD+ oxidoreductase RNF, RnfG subunit	[Energy production and conversion]
Q#1052	EGY34041	specific	227007	54	262	7.86953e-119	341.685	COG4660	RnfE	-	cl00597	Na+-translocating ferredoxin:NAD+ oxidoreductase RNF, RnfE subunit	[Energy production and conversion]
Q#421	EGY34518	multi-dom	227349	1	476	0	819.664	COG5016	OadA1	-	-	Pyruvate/oxaloacetate carboxyltransferase	[Energy production and conversion]
Q#412	EGY34509	non-specific	227844	3	391	1.25235e-97	299.838	COG5557	HybB	-	cl21513	Ni/Fe-hydrogenase 2 integral membrane subunit HybB	[Energy production and conversion]
Q#1493	EGY33834	specific	224975	126	284	6.35395e-15	72.2155	COG2064	TadC	N	cl19503	Pilus assembly protein TadC	[Extracellular structures]
Q#929	EGY33947	specific	223470	1	107	1.33206e-39	129.33	COG0393	YbjQ	-	cl00426	Uncharacterized conserved protein YbjQ, UPF0145 family	[Function unknown]
Q#343	EGY34440	multi-dom	223659	1	201	2.01944e-46	153.977	COG0586	DedA	-	-	Uncharacterized membrane protein DedA, SNARE-associated domain	[Function unknown]
Q#1581	EGY33709	multi-dom	223659	11	160	0.00847225	34.1799	COG0586	DedA	C	-	Uncharacterized membrane protein DedA, SNARE-associated domain	[Function unknown]
Q#1625	EGY34984	multi-dom	223659	19	191	1.77379e-06	45.3507	COG0586	DedA	-	-	Uncharacterized membrane protein DedA, SNARE-associated domain	[Function unknown]
Q#179	EGY34276	specific	223802	2	253	5.40842e-30	113.614	COG0730	YfcA	-	cl21514	Uncharacterized membrane protein YfcA	[Function unknown]
Q#1857	EGY33099	specific	223802	1	265	1.84717e-21	89.7315	COG0730	YfcA	-	cl21514	Uncharacterized membrane protein YfcA	[Function unknown]
Q#1669	EGY35028	specific	223833	91	183	1.80416e-12	59.9437	COG0762	Ycf19	-	cl00508	Uncharacterized conserved protein YggT, Ycf19 family	[Function unknown]
Q#1581	EGY33709	specific	224159	1	160	1.00289e-22	89.2781	COG1238	YgaA	-	cl00429	Uncharacterized membrane protein YqaA, SNARE-associated domain	[Function unknown]
Q#1625	EGY34984	specific	224159	4	165	3.71464e-40	135.887	COG1238	YgaA	-	cl00429	Uncharacterized membrane protein YqaA, SNARE-associated domain	[Function unknown]
Q#1261	EGY33450	multi-dom	224204	19	238	1.7061e-52	171.35	COG1285	SapB	-	-	Uncharacterized membrane protein YhiD, involved in acid resistance	[Function unknown]
Q#263	EGY34360	specific	224205	1	156	4.54063e-44	147.047	COG1286	CvpA	-	cl00567	Uncharacterized membrane protein, required for colicin V production	[Function unknown]
Q#128	EGY34225	multi-dom	224208	1	712	1.48921e-154	466.892	COG1289	YccC	-	-	Uncharacterized membrane protein YccC	[Function unknown]
Q#1947	EGY33189	multi-dom	224208	66	174	0.00308427	36.6244	COG1289	YccC	C	-	Uncharacterized membrane protein YccC	[Function unknown]
Q#681	EGY32444	specific	224214	10	262	2.90859e-59	197.149	COG1295	BrkB	-	cl07918	Uncharacterized membrane protein, BrkB/YihY/UPF0761 family (not an RNase)	[Function unknown]
Q#1107	EGY35315	specific	224216	3	632	0	705.305	COG1297	OPT	-	cl14607	Uncharacterized membrane protein, oligopeptide transporter (OPT) family	[Function unknown]
Q#1226	EGY33518	multi-dom	224310	4	226	5.97144e-73	223.325	COG1392	YkaA	-	-	Uncharacterized conserved protein YkaA, distantly related to PhoU, UPF0111/DUF47 family	[Function unknown]
Q#1805	EGY33047	specific	224317	1	174	9.70496e-54	170.639	COG1399	YceD	-	cl00616	Uncharacterized metal-binding protein YceD, DUF177 family	[Function unknown]
Q#632	EGY32395	multi-dom	224477	1	287	7.20873e-125	360.795	COG1561	YicC	-	-	Uncharacterized conserved protein YicC, UPF0701 family	[Function unknown]
Q#2115	EGY32854	non-specific	224531	123	249	0.00367158	38.1795	COG1615	COG1615	C	cl21537	Uncharacterized membrane protein, UPF0182 family	[Function unknown]
Q#1948	EGY33190	multi-dom	224566	85	145	6.66856e-15	68.4424	COG1652	XkdP	N	-	Nucleoid-associated protein YgaU, contains BON and LysM domains	[Function unknown]
Q#805	EGY32682	specific	224580	1	163	4.80549e-90	262.304	COG1666	YajQ	-	cl00723	Uncharacterized conserved protein YajQ, UPF0234 family	[Function unknown]
Q#790	EGY32759	non-specific	224618	1	44	4.93015e-06	39.5896	COG1704	LemA	C	cl00742	Uncharacterized conserved protein	[Function unknown]
Q#791	EGY32760	non-specific	224618	6	37	2.61399e-06	41.1304	COG1704	LemA	NC	cl00742	Uncharacterized conserved protein	[Function unknown]
Q#603	EGY34790	non-specific	224624	138	176	0.00225224	35.6809	COG1710	COG1710	N	cl22934	Uncharacterized protein	[Function unknown]
Q#715	EGY32478	specific	224652	1	231	1.14538e-55	180.244	COG1738	YhhQ	-	cl00756	Uncharacterized PurR-regulated membrane protein YhhQ, DUF165 family	[Function unknown]
Q#1338	EGY33575	specific	224669	1	172	8.58054e-62	191.004	COG1755	YpbQ	-	cl21511	Uncharacterized protein YpbQ, isoprenylcysteine carboxyl methyltransferase (ICMT) family	[Function unknown]
Q#1668	EGY35027	specific	224784	1	95	5.15897e-32	109.347	COG1872	YggU	-	cl00811	Uncharacterized conserved protein YggU, UPF0235/DUF167 family	[Function unknown]
Q#683	EGY32446	multi-dom	225167	4	217	6.96285e-70	214.89	COG2258	YiiM	-	-	Uncharacterized conserved protein YiiM, contains MOSC domain	[Function unknown]
Q#390	EGY34487	specific	225168	13	137	1.41527e-06	43.1109	COG2259	DoxX	-	cl21527	Uncharacterized membrane protein YphA, DoxX/SURF4 family	[Function unknown]
Q#826	EGY32703	specific	225168	3	129	1.60756e-13	62.756	COG2259	DoxX	-	cl21527	Uncharacterized membrane protein YphA, DoxX/SURF4 family	[Function unknown]
Q#1290	EGY34720	multi-dom	225177	119	402	2.00465e-11	66.0093	COG2268	YqiK	N	-	Uncharacterized membrane protein YqiK, contains Band7/PHB/SPFH domain	[Function unknown]
Q#794	EGY32763	specific	225238	5	128	1.27679e-31	110.461	COG2363	YgdD	-	cl01008	Uncharacterized membrane protein YgdD, TMEM256/DUF423 family	[Function unknown]
Q#325	EGY34422	specific	225287	1	299	9.70446e-91	274.588	COG2431	YbjE	-	cl21520	Uncharacterized membrane protein YbjE, DUF340 family	[Function unknown]
Q#1075	EGY34064	non-specific	225293	915	946	0.00276512	37.6933	COG2445	YutE	NC	cl01031	Uncharacterized conserved protein YutE, UPF0331/DUF86 family	[Function unknown]
Q#1323	EGY34753	specific	225308	1	137	3.02342e-33	115.484	COG2510	COG2510	-	cl22888	Uncharacterized membrane protein	[Function unknown]
Q#793	EGY32762	specific	225334	4	149	7.39202e-43	140.904	COG2707	YeaL	-	cl01041	Uncharacterized membrane protein, DUF441 family	[Function unknown]
Q#952	EGY33970	non-specific	225362	1	208	5.87083e-13	68.2101	COG2802	LON	-	cl19481	Uncharacterized protein, LON-like domain, ASCH/PUA-like superfamily	[Function unknown]
Q#291	EGY34388	multi-dom	225379	4	195	9.59522e-60	187.568	COG2823	OsmY	-	-	Osmotically-inducible protein OsmY, contains BON domain	[Function unknown]
Q#561	EGY34864	specific	225388	1	120	3.88048e-22	85.0272	COG2832	YbaN	-	cl01063	Uncharacterized membrane protein YbaN, DUF454 family	[Function unknown]
Q#251	EGY34348	specific	225391	1	57	7.26303e-22	80.4176	COG2835	YcaR	-	cl01066	Uncharacterized conserved protein YbaR, Trm112 family	[Function unknown]
Q#861	EGY34617	specific	225397	1	72	9.73784e-21	78.5782	COG2841	YdcH	-	cl01070	Uncharacterized conserved protein YdcH, DUF465 family	[Function unknown]
Q#2106	EGY32845	specific	225411	1	330	3.63888e-98	296.446	COG2855	YeiH	-	cl01075	Uncharacterized membrane protein YadS	[Function unknown]
Q#814	EGY32691	multi-dom	225415	1	206	1.07773e-83	250.204	COG2860	YadS	-	-	Uncharacterized membrane protein YeiH	[Function unknown]
Q#981	EGY35245	specific	225417	20	186	1.36258e-59	185.969	COG2862	YqhA	-	cl01078	Uncharacterized membrane protein YqhA	[Function unknown]
Q#745	EGY33369	specific	225453	21	91	1.15567e-25	92.0778	COG2900	SlyX	-	cl01090	Uncharacterized coiled-coil protein SlyX (sensitive to lysis X)	[Function unknown]
Q#1216	EGY33508	specific	225478	1	102	2.28435e-36	121.458	COG2926	YeeX	-	cl23423	Uncharacterized conserved protein YeeX, DUF496 family	[Function unknown]
Q#713	EGY32476	specific	225507	94	438	1.05407e-104	319.83	COG2959	HemX	-	cl19375	Uncharacterized conserved protein HemX (no evidence of involvement in heme biosynthesis)	[Function unknown]
Q#975	EGY35239	multi-dom	225510	1	287	1.29899e-75	235.212	COG2962	RarD	-	-	Uncharacterized membrane protein RarD, contains two EamA domains	[Function unknown]
Q#1796	EGY33038	multi-dom	225514	6	246	1.5683e-71	222.16	COG2966	YjjP	-	-	Uncharacterized membrane protein YjjP, DUF1212 family	[Function unknown]
Q#336	EGY34433	specific	225530	1	144	1.0948e-69	209.229	COG2983	YcgN	-	cl00497	Uncharacterized cysteine cluster protein YcgN, CxxCxxCC family	[Function unknown]
Q#160	EGY34257	non-specific	225537	3	288	1.13608e-99	297.306	COG2990	VirK	-	cl01128	Uncharacterized protein VirK/YbjX, DUF535 family	[Function unknown]
Q#1542	EGY32660	non-specific	225537	1	157	1.12403e-43	147.849	COG2990	VirK	C	cl01128	Uncharacterized protein VirK/YbjX, DUF535 family	[Function unknown]
Q#1543	EGY32661	non-specific	225537	2	133	2.02527e-59	187.524	COG2990	VirK	N	cl01128	Uncharacterized protein VirK/YbjX, DUF535 family	[Function unknown]
Q#658	EGY32421	specific	225538	1	73	7.00479e-34	112.987	COG2991	COG2991	-	cl01129	Uncharacterized protein	[Function unknown]
Q#1243	EGY33535	multi-dom	225542	15	422	5.22515e-168	481.46	COG2995	PqiA	-	-	Uncharacterized paraquat-inducible protein A	[Function unknown]
Q#1242	EGY33534	multi-dom	225553	14	579	0	677.123	COG3008	PqiB	-	-	Paraquat-inducible protein B (function unknown)	[Function unknown]
Q#682	EGY32445	multi-dom	225557	11	156	2.53268e-73	219.212	COG3012	YchJ	-	-	Uncharacterized conserved protein YchJ, contains N- and C-terminal SEC-C domains	[Function unknown]
Q#1516	EGY32634	specific	225558	1	164	8.57489e-85	249.322	COG3013	YfbU	-	cl01137	Uncharacterized protein YfbU, UPF0304 family	[Function unknown]
Q#647	EGY32410	non-specific	225598	5	197	1.84699e-69	212.782	COG3056	YajG	-	cl19472	Uncharacterized lipoprotein YajG	[Function unknown]
Q#102	EGY34199	non-specific	225601	10	136	1.16267e-16	72.2216	COG3059	YkgB	-	cl01162	Uncharacterized membrane protein YkgB	[Function unknown]
Q#1108	EGY35316	specific	225601	1	206	4.51067e-71	216.671	COG3059	YkgB	-	cl01162	Uncharacterized membrane protein YkgB	[Function unknown]
Q#2017	EGY33259	multi-dom	225603	214	439	6.49666e-33	124.667	COG3061	OapA	-	-	Cell envelope opacity-associated protein A (function unknown)	[Function unknown]
Q#701	EGY32464	non-specific	225610	1	191	4.36219e-106	305.613	COG3068	YjaG	-	cl01166	Uncharacterized protein YjaG, DUF416 family	[Function unknown]
Q#714	EGY32477	multi-dom	225613	16	398	2.78868e-140	409.453	COG3071	HemY	-	-	Uncharacterized conserved protein HemY, contains two TPR repeats	[Function unknown]
Q#1658	EGY35017	specific	225621	1	186	9.59806e-73	220.018	COG3079	YgfB	-	cl01173	Uncharacterized conserved protein YgfB, UPF0149 family	[Function unknown]
Q#676	EGY32439	non-specific	225623	1	341	0	537.029	COG3081	NdpA	-	cl15473	Nucleoid-associated protein YejK (function unknown)	[Function unknown]
Q#675	EGY32438	non-specific	225624	1	73	1.22687e-27	96.4869	COG3082	YejL	-	cl01175	Uncharacterized conserved protein YejL, UPF0352 family	[Function unknown]
Q#1768	EGY33010	specific	225626	1	88	2.76784e-48	150.378	COG3084	YihD	-	cl23425	Uncharacterized protein YihD, DUF1040 family	[Function unknown]
Q#1770	EGY33012	specific	225627	1	109	1.53429e-56	173.136	COG3085	YifE	-	cl10479	Uncharacterized conserved protein YifE, UPF0438 family	[Function unknown]
Q#1190	EGY35398	specific	225631	1	70	5.77754e-30	102.208	COG3089	YheU	-	cl01180	Uncharacterized conserved protein YheU, UPF0270 family	[Function unknown]
Q#262	EGY34359	non-specific	225634	1	147	3.51238e-58	180.014	COG3092	YfbV	-	cl01183	Uncharacterized membrane protein YfbV, UPF0208 family	[Function unknown]
Q#168	EGY34265	non-specific	225636	1	114	5.79999e-20	79.762	COG3094	SirB2	-	cl01184	Uncharacterized membrane protein SirB2	[Function unknown]
Q#2126	EGY32865	non-specific	225639	1	52	5.76638e-24	87.1615	COG3097	YqfB	N	cl01020	Uncharacterized protein YqfB, UPF0267 family	[Function unknown]
Q#474	EGY34571	non-specific	225640	1	102	6.38354e-37	122.559	COG3098	YqcC	-	cl01187	Uncharacterized conserved protein YqcC, DUF446 family	[Function unknown]
Q#278	EGY34375	specific	225641	1	105	1.7474e-47	149.597	COG3099	YciU	-	cl11472	Uncharacterized conserved protein YciU, UPF0263 family	[Function unknown]
Q#1728	EGY35211	non-specific	225642	1	68	1.06414e-30	104.878	COG3100	YcgL	N	cl22628	Uncharacterized conserved protein YcgL, UPF0745 family	[Function unknown]
Q#201	EGY34298	non-specific	225647	2	136	4.28388e-50	158.431	COG3105	YhcB	-	cl11473	Uncharacterized membrane-anchored protein YhcB, DUF1043 family	[Function unknown]
Q#1247	EGY33539	multi-dom	225650	1	186	2.94515e-76	229.179	COG3108	YcbK	-	-	Uncharacterized conserved protein YcbK, DUF882 family	[Function unknown]
Q#131	EGY34228	non-specific	225652	19	226	2.63544e-71	219.249	COG3110	YccT	-	cl11437	Uncharacterized conserved protein YccT, UPF0319 family	[Function unknown]
Q#1064	EGY34053	specific	225653	1	136	5.33644e-33	114.441	COG3111	YdeI	-	cl09930	Predicted periplasmic protein YdeI with OB-fold, BOF family	[Function unknown]
Q#2056	EGY32801	non-specific	225654	1	88	8.54372e-16	67.5211	COG3112	YacL	-	cl11474	Uncharacterized protein YacL, UPF0231 family	[Function unknown]
Q#472	EGY34569	non-specific	225682	2	50	1.65038e-13	58.7285	COG3140	yoaH	-	cl22520	Uncharacterized conserved protein YoaH, UPF0181 family	[Function unknown]
Q#214	EGY34311	specific	225694	1	117	3.37498e-35	119.709	COG3152	yhaH	-	cl01224	Uncharacterized membrane protein YhaH, DUF805 family	[Function unknown]
Q#641	EGY32404	specific	225712	1	111	1.84816e-63	191.147	COG3171	YggL	-	cl01237	Uncharacterized conserved protein YggL, DUF469 family	[Function unknown]
Q#208	EGY34305	non-specific	225807	191	285	2.76388e-06	47.8288	COG3268	COG3268	C	cl21454	Uncharacterized conserved protein, related to short-chain dehydrogenases	[Function unknown]
Q#129	EGY34226	multi-dom	225841	8	151	5.74682e-55	172.253	COG3304	YccF	-	-	Uncharacterized membrane protein YccF, DUF307 family	[Function unknown]
Q#1099	EGY35307	specific	225846	24	119	9.75617e-40	132.221	COG3309	VapD	-	cl11442	Virulence-associated protein VapD (function unknown)	[Function unknown]
Q#1287	EGY34717	specific	225854	1	333	3.06661e-94	286.243	COG3317	NlpB	-	cl19507	Uncharacterized lipoprotein, NlpB/DapX family	[Function unknown]
Q#2051	EGY32796	specific	225886	413	460	2.9889e-19	81.699	COG3350	COG3350	-	cl00909	Uncharacterized conserved protein, YHS domain	[Function unknown]
Q#1783	EGY33025	specific	225930	1	415	0	513.477	COG3395	YgbK	-	cl01345	Uncharacterized conserved protein YgbK, DUF1537 family	[Function unknown]
Q#146	EGY34243	non-specific	225955	69	473	6.969e-10	60.282	COG3421	COG3421	C	cl21455	Uncharacterized protein	[Function unknown]
Q#204	EGY34301	specific	225956	2	58	2.35744e-22	84.0179	COG3422	YegP	-	cl01356	Uncharacterized conserved protein YegP, UPF0339 family	[Function unknown]
Q#204	EGY34301	non-specific	225956	57	111	1.29666e-08	47.0387	COG3422	YegP	-	cl01356	Uncharacterized conserved protein YegP, UPF0339 family	[Function unknown]
Q#103	EGY34200	non-specific	225972	36	163	2.2606e-21	85.0915	COG3439	COG3439	-	cl21600	Uncharacterized conserved protein, DUF302 family	[Function unknown]
Q#859	EGY34615	non-specific	226002	19	237	2.88322e-43	147.762	COG3471	COG3471	-	cl01077	Predicted secreted (periplasmic) protein	[Function unknown]
Q#22	EGY33481	non-specific	226008	10	196	3.33807e-57	180.743	COG3477	YagU	-	cl01380	Uncharacterized membrane protein YagU, involved in acid resistance, DUF1440 family	[Function unknown]
Q#809	EGY32686	non-specific	226112	285	348	0.000368583	38.5422	COG3584	3D	N	cl01439	3D (Asp-Asp-Asp) domain	[Function unknown]
Q#1795	EGY33037	specific	226137	7	154	2.00527e-41	137.413	COG3610	YjjB	-	cl01118	Uncharacterized membrane protein YjjB, DUF3815 family	[Function unknown]
Q#267	EGY34364	specific	226142	1	96	2.08216e-49	161.073	COG3615	TehB	-	cl22962	Uncharacterized protein/domain, possibly involved in tellurite resistance	[Function unknown]
Q#1297	EGY34727	specific	226215	1	96	3.74345e-36	119.874	COG3691	YfcZ	-	cl11449	Uncharacterized conserved protein YfcZ, UPF0381/DUF406 family	[Function unknown]
Q#803	EGY32680	specific	226249	1	195	5.05316e-60	190.057	COG3726	AhpA	-	cl23432	Uncharacterized membrane protein affecting hemolysin expression	[Function unknown]
Q#1910	EGY33152	specific	226262	17	280	6.86121e-123	354.49	COG3739	YoaT	-	cl01520	Uncharacterized membrane protein YoaT, DUF817 family	[Function unknown]
Q#542	EGY34845	multi-dom	226291	1	348	5.89006e-128	374.043	COG3768	YcjF	-	-	Uncharacterized membrane protein YcjF, UPF0283 family	[Function unknown]
Q#164	EGY34261	specific	226294	2	96	4.40703e-30	104.455	COG3771	YciS	-	cl23435	Uncharacterized membrane protein YciS, DUF1049 family	[Function unknown]
Q#1350	EGY33587	non-specific	226313	3	29	0.00141279	31.6598	COG3790	YbgE	N	cl11451	Predicted membrane protein, encoded in cydAB operon	[Function unknown]
Q#1875	EGY33117	non-specific	226437	3	81	2.10871e-36	119.844	COG3924	YhdT	-	cl01614	Uncharacterized membrane protein YhdT	[Function unknown]
Q#451	EGY34548	non-specific	226452	4	132	1.53762e-34	129.298	COG3943	COG3943	C	cl19850	Uncharacterized conserved protein	[Function unknown]
Q#591	EGY34894	non-specific	226452	3	48	1.58065e-05	39.5462	COG3943	COG3943	C	cl19850	Uncharacterized conserved protein	[Function unknown]
Q#594	EGY34897	non-specific	226452	10	82	2.95828e-12	59.9618	COG3943	COG3943	C	cl19850	Uncharacterized conserved protein	[Function unknown]
Q#713	EGY32476	multi-dom	226809	97	270	0.00388233	38.0822	COG4372	COG4372	C	-	Uncharacterized conserved protein, contains DUF3084 domain	[Function unknown]
Q#1555	EGY33683	non-specific	226825	1	102	1.35598e-44	141.975	COG4390	COG4390	-	cl01820	Uncharacterized protein	[Function unknown]
Q#2051	EGY32796	multi-dom	226828	1	412	2.79567e-140	411.903	COG4393	COG4393	-	-	Uncharacterized membrane protein	[Function unknown]
Q#525	EGY33914	non-specific	226995	2	178	1.14569e-32	117.314	COG4648	COG4648	-	cl01903	Uncharacterized membrane protein	[Function unknown]
Q#1924	EGY33166	non-specific	226996	25	191	0.00507731	35.5793	COG4649	COG4649	-	cl19869	Uncharacterized protein	[Function unknown]
Q#1171	EGY35379	non-specific	227045	1	99	6.93476e-32	111.194	COG4701	COG4701	C	cl02324	Uncharacterized protein	[Function unknown]
Q#1336	EGY33573	non-specific	227209	18	120	0.00233867	39.8265	COG4872	COG4872	C	cl10480	Uncharacterized membrane protein	[Function unknown]
Q#1336	EGY33573	non-specific	227266	680	853	5.11457e-36	135.317	COG4929	COG4929	-	cl02066	Uncharacterized membrane-anchored protein	[Function unknown]
Q#1336	EGY33573	multi-dom	227317	6	643	6.73842e-36	143.473	COG4984	COG4984	-	-	Uncharacterized membrane protein	[Function unknown]
Q#1720	EGY35203	non-specific	227644	3	474	2.08632e-74	244.305	COG5339	YdgA	-	cl19471	Uncharacterized conserved protein YdgA, DUF945 family	[Function unknown]
Q#2011	EGY33253	non-specific	227700	1	168	1.48549e-51	164.549	COG5413	COG5413	-	cl02241	Uncharacterized integral membrane protein	[Function unknown]
Q#24	EGY33483	non-specific	227854	1	39	6.93206e-05	34.8718	COG5567	YifL	C	cl23464	Predicted small periplasmic lipoprotein YifL (function unknown0	[Function unknown]
Q#2001	EGY33243	non-specific	227920	1	116	3.07282e-19	77.5532	COG5633	YcfL	-	cl12345	Uncharacterized conserved protein YcfL	[Function unknown]
Q#1576	EGY33704	non-specific	227932	19	75	6.76109e-20	76.7332	COG5645	YceK	-	cl11456	Uncharacterized conserved protein YceK	[Function unknown]
Q#1580	EGY33708	multi-dom	223188	20	194	2.6577e-40	137.325	COG0110	WbbJ	-	-	Acetyltransferase (isoleucine patch superfamily)	[General function prediction only]
Q#698	EGY32461	non-specific	223199	57	126	8.82644e-06	46.2277	COG0121	YafJ	NC	cl00319	Predicted glutamine amidotransferase	[General function prediction only]
Q#17	EGY33476	multi-dom	223377	1	251	2.51467e-71	221.738	COG0300	DltE	-	-	Short-chain dehydrogenase	[General function prediction only]
Q#1897	EGY33139	specific	223389	22	453	3.20611e-121	363.968	COG0312	TldD	-	cl19356	Predicted Zn-dependent protease or its inactivated homolog	[General function prediction only]
Q#2103	EGY32842	specific	223389	16	481	1.71689e-165	478.372	COG0312	TldD	-	cl19356	Predicted Zn-dependent protease or its inactivated homolog	[General function prediction only]
Q#23	EGY33482	non-specific	223402	124	237	0.000767098	39.5092	COG0325	YggS	N	cl00261	Uncharacterized pyridoxal phosphate-containing protein, affects Ilv metabolism, UPF0001 family	[General function prediction only]
Q#1283	EGY34713	specific	223402	3	231	4.79878e-110	318.394	COG0325	YggS	-	cl00261	Uncharacterized pyridoxal phosphate-containing protein, affects Ilv metabolism, UPF0001 family	[General function prediction only]
Q#1672	EGY35155	specific	223465	227	483	5.27755e-09	55.9517	COG0388	YafV	-	cl11424	Predicted amidohydrolase	[General function prediction only]
Q#119	EGY34216	multi-dom	223562	1	533	0	581.132	COG0488	Uup	-	-	ATPase components of ABC transporters with duplicated ATPase domains	[General function prediction only]
Q#193	EGY34290	multi-dom	223562	10	528	0	668.187	COG0488	Uup	-	-	ATPase components of ABC transporters with duplicated ATPase domains	[General function prediction only]
Q#2155	EGY35089	multi-dom	223562	1	196	2.36644e-75	237.919	COG0488	Uup	C	-	ATPase components of ABC transporters with duplicated ATPase domains	[General function prediction only]
Q#207	EGY34304	multi-dom	223565	3	211	1.49593e-25	100.64	COG0491	GloB	-	-	Glyoxylase or a related metal-dependent hydrolase, beta-lactamase superfamily II	[General function prediction only]
Q#1248	EGY33540	multi-dom	223565	1	203	5.38644e-46	154.568	COG0491	GloB	-	-	Glyoxylase or a related metal-dependent hydrolase, beta-lactamase superfamily II	[General function prediction only]
Q#16	EGY33475	multi-dom	223597	7	47	1.99707e-05	42.2822	COG0523	YejR	C	-	GTPase, G3E family	[General function prediction only]
Q#1152	EGY35360	specific	223672	87	179	2.19694e-07	48.1193	COG0599	YurZ	C	cl00460	Uncharacterized conserved protein YurZ, alkylhydroperoxidase/carboxymuconolactone decarboxylase family	[General function prediction only]
Q#1152	EGY35360	specific	223672	2	75	4.20974e-07	47.3489	COG0599	YurZ	N	cl00460	Uncharacterized conserved protein YurZ, alkylhydroperoxidase/carboxymuconolactone decarboxylase family	[General function prediction only]
Q#1633	EGY34992	specific	223672	1	106	4.85617e-22	84.7133	COG0599	YurZ	-	cl00460	Uncharacterized conserved protein YurZ, alkylhydroperoxidase/carboxymuconolactone decarboxylase family	[General function prediction only]
Q#1829	EGY33071	multi-dom	223675	1	154	7.24998e-50	161.014	COG0602	NrdG	C	-	Organic radical activating enzyme	[General function prediction only]
Q#2146	EGY32885	multi-dom	223675	8	209	9.86268e-59	186.052	COG0602	NrdG	-	-	Organic radical activating enzyme	[General function prediction only]
Q#158	EGY34255	multi-dom	223685	32	459	1.00207e-65	227.728	COG0612	PqqL	-	-	Predicted Zn-dependent peptidase	[General function prediction only]
Q#158	EGY34255	multi-dom	223685	525	928	3.03181e-13	71.7221	COG0612	PqqL	-	-	Predicted Zn-dependent peptidase	[General function prediction only]
Q#361	EGY34458	multi-dom	223686	5	260	2.09021e-88	266.653	COG0613	YciV	-	-	Predicted metal-dependent phosphoesterase TrpH, contains PHP domain	[General function prediction only]
Q#867	EGY34623	specific	223701	4	348	7.3324e-61	200.941	COG0628	PerM	-	cl00465	Predicted PurR-regulated permease PerM	[General function prediction only]
Q#1180	EGY35388	non-specific	223718	4	154	3.75599e-05	40.8554	COG0645	COG0645	C	cl21455	Predicted kinase	[General function prediction only]
Q#254	EGY34351	multi-dom	223731	11	444	3.77568e-41	156.891	COG0658	ComEC	-	-	Predicted membrane metal-binding protein	[General function prediction only]
Q#689	EGY32452	multi-dom	223739	45	131	1.43627e-27	104.332	COG0667	Tas	C	-	Predicted oxidoreductase (related to aryl-alcohol dehydrogenase)	[General function prediction only]
Q#690	EGY32453	multi-dom	223739	2	210	6.57624e-61	195.624	COG0667	Tas	N	-	Predicted oxidoreductase (related to aryl-alcohol dehydrogenase)	[General function prediction only]
Q#691	EGY32454	multi-dom	223739	1	314	4.29411e-113	333.526	COG0667	Tas	-	-	Predicted oxidoreductase (related to aryl-alcohol dehydrogenase)	[General function prediction only]
Q#138	EGY34235	specific	223742	34	253	7.48989e-39	136.667	COG0670	YbhL	-	cl00473	Integral membrane protein, interacts with FtsH	[General function prediction only]
Q#1384	EGY33621	multi-dom	223745	1	334	2.44853e-79	248.236	COG0673	MviM	-	-	Predicted dehydrogenase	[General function prediction only]
Q#1393	EGY33630	multi-dom	223745	1	377	7.69035e-75	237.836	COG0673	MviM	-	-	Predicted dehydrogenase	[General function prediction only]
Q#761	EGY33385	multi-dom	223774	6	267	6.37062e-43	149.67	COG0702	YbjT	-	-	Uncharacterized conserved protein YbjT, contains NAD(P)-binding and DUF2867 domains	[General function prediction only]
Q#510	EGY33899	multi-dom	223786	178	469	0.000354808	41.6522	COG0714	MoxR	-	-	MoxR-like ATPase	[General function prediction only]
Q#1435	EGY33776	specific	223790	47	152	1.08674e-42	139.306	COG0718	YbaB	-	cl00494	Conserved DNA-binding protein YbaB (function unknown)	[General function prediction only]
Q#1054	EGY34043	specific	223805	7	457	6.79294e-151	439.732	COG0733	YocR	-	cl11976	Na+-dependent transporter, SNF family	[General function prediction only]
Q#1258	EGY33447	specific	223805	6	456	1.81243e-147	432.413	COG0733	YocR	-	cl11976	Na+-dependent transporter, SNF family	[General function prediction only]
Q#260	EGY34357	multi-dom	223926	1	380	1.16015e-129	390.906	COG0857	PtaN	-	-	BioD-like N-terminal domain of phosphotransacetylase	[General function prediction only]
Q#439	EGY34536	multi-dom	223926	1	41	4.0946e-05	42.6854	COG0857	PtaN	C	-	BioD-like N-terminal domain of phosphotransacetylase	[General function prediction only]
Q#181	EGY34278	multi-dom	223970	84	169	0.0030925	36.2145	COG1040	ComFC	N	-	Predicted amidophosphoribosyltransferases	[General function prediction only]
Q#505	EGY33894	multi-dom	223970	1	228	1.23914e-72	223.036	COG1040	ComFC	-	-	Predicted amidophosphoribosyltransferases	[General function prediction only]
Q#635	EGY32398	multi-dom	223970	113	145	0.000942881	37.7553	COG1040	ComFC	N	-	Predicted amidophosphoribosyltransferases	[General function prediction only]
Q#1156	EGY35364	multi-dom	223970	95	134	0.00310382	35.8293	COG1040	ComFC	N	-	Predicted amidophosphoribosyltransferases	[General function prediction only]
Q#752	EGY33376	multi-dom	223982	52	133	0.000433933	37.6409	COG1054	YceA	NC	-	Predicted sulfurtransferase	[General function prediction only]
Q#982	EGY35246	multi-dom	223982	7	99	1.8511e-08	49.5821	COG1054	YceA	NC	-	Predicted sulfurtransferase	[General function prediction only]
Q#1148	EGY35356	multi-dom	223990	2	134	5.42767e-68	211.311	COG1062	FrmA	N	-	Zn-dependent alcohol dehydrogenase	[General function prediction only]
Q#1149	EGY35357	multi-dom	223990	6	217	5.41003e-117	341.509	COG1062	FrmA	C	-	Zn-dependent alcohol dehydrogenase	[General function prediction only]
Q#1046	EGY34035	multi-dom	224015	3	292	4.7232e-125	361.968	COG1090	YfcH	-	-	NAD dependent epimerase/dehydratase family enzyme	[General function prediction only]
Q#1790	EGY33032	multi-dom	224024	1	257	3.86447e-17	77.0617	COG1099	COG1099	-	-	Predicted metal-dependent hydrolase, TIM-barrel fold	[General function prediction only]
Q#1828	EGY33070	multi-dom	224024	3	139	1.78493e-06	46.6309	COG1099	COG1099	C	-	Predicted metal-dependent hydrolase, TIM-barrel fold	[General function prediction only]
Q#1700	EGY35183	multi-dom	224082	1	488	0	644.242	COG1160	Der	-	-	Predicted GTPases	[General function prediction only]
Q#1793	EGY33035	multi-dom	224173	17	431	7.49143e-132	389.734	COG1253	TlyC	-	-	Hemolysin or related protein, contains CBS domains	[General function prediction only]
Q#876	EGY34632	multi-dom	224207	1	506	0	567.313	COG1288	YfcC	-	-	Uncharacterized membrane protein YfcC, ion transporter superfamily	[General function prediction only]
Q#1446	EGY33787	multi-dom	224292	10	364	1.45863e-45	162.957	COG1373	COG1373	-	-	Predicted ATPase, AAA+ superfamily	[General function prediction only]
Q#1590	EGY33718	multi-dom	224292	12	424	4.16995e-32	125.208	COG1373	COG1373	-	-	Predicted ATPase, AAA+ superfamily	[General function prediction only]
Q#114	EGY34211	specific	224298	3	129	3.61968e-24	91.1351	COG1380	YohJ	-	cl00608	Putative effector of murein hydrolase LrgA, UPF0299 family	[General function prediction only]
Q#1436	EGY33777	specific	224326	122	355	2.46869e-27	108.662	COG1408	YaeI	-	cl13995	Predicted phosphohydrolase, MPP superfamily	[General function prediction only]
Q#55	EGY34152	specific	224351	31	245	1.0997e-32	119.905	COG1434	YdcF	-	cl00630	Uncharacterized SAM-binding protein YcdF, DUF218 family	[General function prediction only]
Q#731	EGY33355	specific	224351	1	111	1.07815e-15	69.4441	COG1434	YdcF	N	cl00630	Uncharacterized SAM-binding protein YcdF, DUF218 family	[General function prediction only]
Q#1706	EGY35189	multi-dom	224397	60	204	0.00450496	38.1344	COG1480	YqfF	NC	-	Membrane-associated HD superfamily phosphohydrolase	[General function prediction only]
Q#1982	EGY33224	non-specific	224402	134	260	0.000140547	42.2825	COG1485	YhcM	C	cl21455	Predicted ATPase	[General function prediction only]
Q#1447	EGY33788	multi-dom	224522	7	72	2.08093e-05	43.1231	COG1606	COG1606	C	-	ATP-utilizing enzyme, PP-loop superfamily	[General function prediction only]
Q#828	EGY32705	specific	224527	1	182	2.15964e-47	155.93	COG1611	YgdH	-	cl22881	Predicted Rossmann fold nucleotide-binding protein	[General function prediction only]
Q#845	EGY32722	specific	224551	38	241	2.78583e-122	348.975	COG1636	COG1636	-	cl00292	Predicted ATPase, Adenine nucleotide alpha hydrolases (AANH) superfamily	[General function prediction only]
Q#487	EGY34584	non-specific	224621	9	77	0.00428251	36.3402	COG1707	COG1707	C	cl09141	Uncharacterized protein, contains ACT and thioredoxin-like domains	[General function prediction only]
Q#625	EGY32388	non-specific	224621	669	741	9.16582e-05	43.2738	COG1707	COG1707	C	cl09141	Uncharacterized protein, contains ACT and thioredoxin-like domains	[General function prediction only]
Q#932	EGY33950	non-specific	224621	347	409	0.00349924	37.4958	COG1707	COG1707	C	cl09141	Uncharacterized protein, contains ACT and thioredoxin-like domains	[General function prediction only]
Q#1161	EGY35369	specific	224622	1	96	1.65205e-05	39.1947	COG1708	COG1708	C	cl11966	Predicted nucleotidyltransferase	[General function prediction only]
Q#1868	EGY33110	specific	224622	16	106	2.37611e-05	39.1947	COG1708	COG1708	-	cl11966	Predicted nucleotidyltransferase	[General function prediction only]
Q#1076	EGY34065	non-specific	224627	23	101	0.00138701	39.2019	COG1713	YqeK	C	cl21469	HD superfamily phosphohydrolase YqeK (fused to NMNAT in mycoplasms)	[General function prediction only]
Q#735	EGY33359	multi-dom	224666	63	328	0.00469333	37.4066	COG1752	RssA	C	-	Predicted acylesterase/phospholipase RssA, containd patatin domain	[General function prediction only]
Q#1545	EGY32663	specific	224793	1	163	9.29834e-48	154.844	COG1881	PEBP	-	cl00227	Uncharacterized conserved protein, phosphatidylethanolamine-binding protein (PEBP) family	[General function prediction only]
Q#258	EGY34355	non-specific	224829	1	88	1.72075e-06	42.5569	COG1917	QdoI	C	cl21464	Cupin domain protein related to quercetin dioxygenase	[General function prediction only]
Q#1152	EGY35360	specific	224829	204	312	2.5119e-18	79.1509	COG1917	QdoI	-	cl21464	Cupin domain protein related to quercetin dioxygenase	[General function prediction only]
Q#1409	EGY33646	specific	224829	1	110	2.46182e-16	69.9061	COG1917	QdoI	-	cl21464	Cupin domain protein related to quercetin dioxygenase	[General function prediction only]
Q#1092	EGY34081	multi-dom	224981	27	214	0.000260671	40.0045	COG2070	YrpB	C	-	NAD(P)H-dependent flavin oxidoreductase YrpB, nitropropane dioxygenase family	[General function prediction only]
Q#1977	EGY33219	multi-dom	224992	7	399	0	553.349	COG2081	YhiN	-	-	Predicted flavoprotein YhiN	[General function prediction only]
Q#8	EGY33302	non-specific	225040	2	189	2.35903e-05	42.7388	COG2129	COG2129	-	cl13995	Predicted phosphoesterase, related to the Icc protein	[General function prediction only]
Q#107	EGY34204	specific	225158	1	194	6.47549e-59	185.575	COG2249	MdaB	-	cl00438	Putative NADPH-quinone reductase (modulator of drug activity B)	[General function prediction only]
Q#1760	EGY33002	non-specific	225158	2	164	3.96001e-32	115.468	COG2249	MdaB	-	cl00438	Putative NADPH-quinone reductase (modulator of drug activity B)	[General function prediction only]
Q#1725	EGY35208	non-specific	225172	124	204	4.48754e-06	45.3825	COG2263	COG2263	NC	cl17173	Predicted RNA methylase	[General function prediction only]
Q#1878	EGY33120	non-specific	225172	152	230	3.26161e-15	71.1908	COG2263	COG2263	C	cl17173	Predicted RNA methylase	[General function prediction only]
Q#1949	EGY33191	specific	225203	1	275	1.78191e-135	387.52	COG2321	YpfJ	-	cl19825	Predicted metalloprotease	[General function prediction only]
Q#254	EGY34351	multi-dom	225212	548	799	1.13505e-80	262.658	COG2333	ComEC	-	-	Metal-dependent hydrolase, beta-lactamase superfamily II	[General function prediction only]
Q#923	EGY32327	specific	225225	1	98	5.29438e-36	119.345	COG2350	YciI	-	cl00999	Uncharacterized conserved protein YciI, contains a putative active-site phosphohistidine	[General function prediction only]
Q#1759	EGY33001	non-specific	225225	1	84	2.92546e-07	43.4605	COG2350	YciI	-	cl00999	Uncharacterized conserved protein YciI, contains a putative active-site phosphohistidine	[General function prediction only]
Q#2105	EGY32844	multi-dom	225248	42	1626	0	1003.1	COG2373	YfaS	-	-	Uncharacterized conserved protein YfaS, alpha-2-macroglobulin family	[General function prediction only]
Q#1884	EGY33126	specific	225261	3	83	8.15647e-20	77.3824	COG2388	YidJ	-	cl17182	Predicted acetyltransferase, GNAT superfamily	[General function prediction only]
Q#806	EGY32683	specific	225305	1	270	9.62375e-126	361.783	COG2503	COG2503	-	cl21460	Predicted secreted acid phosphatase	[General function prediction only]
Q#394	EGY34491	multi-dom	225315	4	146	0.000343962	41.3855	COG2517	COG2517	N	-	Predicted RNA-binding protein, contains C-terminal EMAP domain	[General function prediction only]
Q#1147	EGY35355	non-specific	225375	29	172	2.35554e-05	43.5489	COG2819	YbbA	C	cl21494	Predicted hydrolase of the alpha/beta superfamily	[General function prediction only]
Q#328	EGY34425	multi-dom	225380	1	107	1.09408e-53	165.655	COG2824	PhnA	-	-	Uncharacterized Zn-ribbon-containing protein	[General function prediction only]
Q#69	EGY34166	non-specific	225462	2	79	0.00761547	35.4142	COG2910	YwnB	C	cl21454	Putative NADH-flavin reductase	[General function prediction only]
Q#761	EGY33385	non-specific	225462	6	97	1.86616e-05	43.5034	COG2910	YwnB	C	cl21454	Putative NADH-flavin reductase	[General function prediction only]
Q#1046	EGY34035	non-specific	225462	1	36	1.03483e-05	44.2738	COG2910	YwnB	C	cl21454	Putative NADH-flavin reductase	[General function prediction only]
Q#989	EGY35253	multi-dom	225532	1	550	0	611.344	COG2985	YbjL	-	-	Uncharacterized membrane protein YbjL, putative transporter	[General function prediction only]
Q#76	EGY34173	multi-dom	225565	2	266	1.29414e-05	44.3544	COG3021	YafD	N	-	Uncharacterized conserved protein YafD, endonuclease/exonuclease/phosphatase (EEP) superfamily	[General function prediction only]
Q#183	EGY34280	multi-dom	225565	56	293	5.70521e-40	142.965	COG3021	YafD	N	-	Uncharacterized conserved protein YafD, endonuclease/exonuclease/phosphatase (EEP) superfamily	[General function prediction only]
Q#618	EGY32381	non-specific	225574	2	153	2.18651e-19	80.0052	COG3030	FxsA	-	cl01148	Protein affecting phage T7 exclusion by the F plasmid, UPF0716 family	[General function prediction only]
Q#1934	EGY33176	specific	225633	12	162	9.51629e-58	179.849	COG3091	SprT	-	cl19237	Predicted Zn-dependent metalloprotease, SprT family	[General function prediction only]
Q#1722	EGY35205	specific	225644	6	186	2.5709e-68	208.833	COG3102	YecM	-	cl14632	Uncharacterized conserved protein YecM, predicted metalloenzyme	[General function prediction only]
Q#1224	EGY33516	multi-dom	225645	1	203	1.7011e-68	210.715	COG3103	YgiM	-	-	Uncharacterized conserved protein YgiM, contains N-terminal SH3 domain, DUF1202 family	[General function prediction only]
Q#541	EGY34844	non-specific	225648	1	468	0	699.559	COG3106	YcjX	-	cl01193	Predicted ATPase, YcjX-like family	[General function prediction only]
Q#2120	EGY32859	non-specific	225692	1	70	5.41082e-32	110.965	COG3150	ycfP	C	cl21494	Predicted esterase YcpF, UPF0227 family	[General function prediction only]
Q#1533	EGY32651	multi-dom	225750	1120	1844	1.36401e-44	174.351	COG3209	RhsA	-	-	Uncharacterized conserved protein RhaS, contains 28 RHS repeats	[General function prediction only]
Q#394	EGY34491	non-specific	225917	235	310	5.13965e-07	50.041	COG3382	B3/B4	NC	cl21573	B3/B4 domain (DNA/RNA-binding domain of Phe-tRNA-synthetase)	[General function prediction only]
Q#1253	EGY33545	multi-dom	225918	1	534	0	541.641	COG3383	YjgC	N	-	Predicted molibdopterin-dependent oxidoreductase YjgC	[General function prediction only]
Q#1254	EGY33546	multi-dom	225918	15	162	2.52077e-47	164.916	COG3383	YjgC	NC	-	Predicted molibdopterin-dependent oxidoreductase YjgC	[General function prediction only]
Q#1741	EGY32983	non-specific	226075	97	150	0.000900108	38.0785	COG3545	YdeN	NC	cl21494	Predicted esterase of the alpha/beta hydrolase fold	[General function prediction only]
Q#183	EGY34280	non-specific	226098	67	292	1.49549e-16	75.8999	COG3568	ElsH	-	cl00490	Metal-dependent hydrolase, endonuclease/exonuclease/phosphatase family	[General function prediction only]
Q#1417	EGY33654	multi-dom	226124	41	325	2.8063e-50	170.742	COG3596	YeeP	-	-	Predicted GTPase	[General function prediction only]
Q#195	EGY34292	specific	226208	26	220	2.41528e-75	229.22	COG3683	COG3683	-	cl01487	ABC-type uncharacterized transport system, periplasmic component	[General function prediction only]
Q#672	EGY32435	multi-dom	226465	2	262	1.32714e-78	247.838	COG3956	YabN	N	-	Uncharacterized conserved protein YabN, contains tetrapyrrole methylase and MazG-like pyrophosphatase domain	[General function prediction only]
Q#808	EGY32685	non-specific	226502	13	155	0.00318896	36.3709	COG4015	COG4015	C	cl17173	Predicted dinucleotide-utilizing enzyme of the ThiF/HesA family	[General function prediction only]
Q#1909	EGY33151	specific	226572	560	626	4.47693e-05	42.9312	COG4087	COG4087	NC	cl21460	Soluble P-type ATPase	[General function prediction only]
Q#1779	EGY33021	multi-dom	226584	9	445	1.1103e-98	303.37	COG4099	COG4099	-	-	Predicted peptidase	[General function prediction only]
Q#1227	EGY33519	non-specific	226601	4	102	1.06765e-06	47.3858	COG4116	YjbK	C	cl11964	Predicted triphosphatase or cyclase YjbK, contains CYTH domain	[General function prediction only]
Q#151	EGY34248	non-specific	226607	6	194	2.36356e-34	122.433	COG4122	YrrM	-	cl17173	Predicted O-methyltransferase YrrM	[General function prediction only]
Q#1586	EGY33714	non-specific	226607	23	119	5.83939e-10	55.7937	COG4122	YrrM	NC	cl17173	Predicted O-methyltransferase YrrM	[General function prediction only]
Q#1979	EGY33221	non-specific	226607	37	169	1.00882e-05	44.2378	COG4122	YrrM	N	cl17173	Predicted O-methyltransferase YrrM	[General function prediction only]
Q#247	EGY34344	non-specific	226618	23	333	1.66661e-66	217.034	COG4134	YnjB	-	cl21456	ABC-type uncharacterized transport system YnjBCD, periplasmic component	[General function prediction only]
Q#1144	EGY35352	non-specific	226621	1	262	9.78873e-62	197.562	COG4137	YpjD	-	cl00504	ABC-type uncharacterized transport system, permease component	[General function prediction only]
Q#988	EGY35252	multi-dom	226646	24	600	0	692.899	COG4178	YddA	-	-	ABC-type uncharacterized transport system, permease and ATPase components	[General function prediction only]
Q#2089	EGY32828	multi-dom	226646	13	581	0	571.561	COG4178	YddA	-	-	ABC-type uncharacterized transport system, permease and ATPase components	[General function prediction only]
Q#2125	EGY32864	non-specific	226648	11	182	2.86005e-62	193.833	COG4185	COG4185	-	cl21455	Predicted ABC-type ATPase	[General function prediction only]
Q#1159	EGY35367	non-specific	226649	29	113	3.06291e-05	42.5622	COG4186	COG4186	NC	cl13995	Calcineurin-like phosphoesterase superfamily protein	[General function prediction only]
Q#532	EGY33921	multi-dom	226709	23	751	1.36336e-66	236.309	COG4258	COG4258	-	-	Predicted exporter	[General function prediction only]
Q#528	EGY33917	non-specific	226712	3	107	8.38443e-13	62.5199	COG4261	COG4261	C	cl17185	Predicted acyltransferase, LPLAT superfamily	[General function prediction only]
Q#529	EGY33918	non-specific	226712	6	165	1.7807e-44	150.345	COG4261	COG4261	N	cl17185	Predicted acyltransferase, LPLAT superfamily	[General function prediction only]
Q#552	EGY34855	multi-dom	226713	40	410	1.05515e-10	62.515	COG4262	COG4262	-	-	Predicted spermidine synthase with an N-terminal membrane domain	[General function prediction only]
Q#553	EGY34856	multi-dom	226713	14	188	2.20717e-06	45.9515	COG4262	COG4262	C	-	Predicted spermidine synthase with an N-terminal membrane domain	[General function prediction only]
Q#942	EGY33960	multi-dom	227012	67	392	4.95134e-10	60.0118	COG4666	COG4666	N	-	TRAP-type uncharacterized transport system, fused permease components	[General function prediction only]
Q#1090	EGY34079	multi-dom	227012	252	574	4.04777e-14	73.879	COG4666	COG4666	N	-	TRAP-type uncharacterized transport system, fused permease components	[General function prediction only]
Q#1601	EGY34769	multi-dom	227019	44	137	0.00481939	34.6182	COG4674	COG4674	NC	-	ABC-type uncharacterized transport system, ATPase component	[General function prediction only]
Q#396	EGY34493	multi-dom	227122	44	288	3.76473e-08	52.788	COG4783	YfgC	C	-	Putative Zn-dependent protease, contains TPR repeats	[General function prediction only]
Q#1507	EGY32625	multi-dom	227122	15	245	2.51109e-22	94.3896	COG4783	YfgC	C	-	Putative Zn-dependent protease, contains TPR repeats	[General function prediction only]
Q#1123	EGY35331	specific	227141	106	264	8.49796e-54	173.823	COG4804	YhcG	-	cl19557	Predicted nuclease of restriction endonuclease-like (RecB) superfamily, DUF1016 family	[General function prediction only]
Q#448	EGY34545	non-specific	227347	18	187	1.49526e-07	50.261	COG5014	COG5014	-	cl18962	Uncharacterized Fe-S cluster-containing protein, radical SAM superfamily	[General function prediction only]
Q#358	EGY34455	multi-dom	227591	1	263	5.32121e-78	240.102	COG5266	COG5266	-	-	Uncharacterized conserved protein, contains GH25 family domain	[General function prediction only]
Q#1016	EGY34005	multi-dom	227591	1	231	2.24462e-45	153.817	COG5266	COG5266	-	-	Uncharacterized conserved protein, contains GH25 family domain	[General function prediction only]
Q#475	EGY34572	specific	227882	1	260	2.50528e-124	357.293	COG5595	COG5595	-	cl02380	Predicted nucleic acid-binding protein, contains Zn-ribbon domain	[General function prediction only]
Q#1912	EGY33154	non-specific	227893	16	105	7.99572e-16	67.5669	COG5606	COG5606	-	cl22854	Predicted DNA-binding protein, XRE-type HTH domain	[General function prediction only]
Q#374	EGY34471	multi-dom	224045	6	243	1.00599e-51	182.378	COG1120	FepC	-	-	ABC-type cobalamin/Fe3+-siderophores transport system, ATPase component	[Inorganic ion transport and metabolism, Coenzyme transport and metabolism]
Q#378	EGY34475	multi-dom	224045	2	261	4.07565e-82	249.788	COG1120	FepC	-	-	ABC-type cobalamin/Fe3+-siderophores transport system, ATPase component	[Inorganic ion transport and metabolism, Coenzyme transport and metabolism]
Q#382	EGY34479	multi-dom	224045	3	249	1.02838e-93	278.678	COG1120	FepC	-	-	ABC-type cobalamin/Fe3+-siderophores transport system, ATPase component	[Inorganic ion transport and metabolism, Coenzyme transport and metabolism]
Q#1437	EGY33778	multi-dom	224045	12	57	4.72261e-10	52.1804	COG1120	FepC	N	-	ABC-type cobalamin/Fe3+-siderophores transport system, ATPase component	[Inorganic ion transport and metabolism, Coenzyme transport and metabolism]
Q#2140	EGY32879	specific	223854	1	156	6.96752e-60	185.167	COG0783	Dps	-	cl00264	DNA-binding ferritin-like protein (oxidative damage protectant)	[Inorganic ion transport and metabolism, Defense mechanisms]
Q#1083	EGY34072	multi-dom	224047	1	208	5.61726e-46	153.951	COG1122	EcfA2	-	-	Energy-coupling factor transporter ATP-binding protein EcfA2	[Inorganic ion transport and metabolism, General function prediction only]
Q#2101	EGY32840	multi-dom	224047	1	197	4.39352e-32	117.357	COG1122	EcfA2	-	-	Energy-coupling factor transporter ATP-binding protein EcfA2	[Inorganic ion transport and metabolism, General function prediction only]
Q#2156	EGY35090	multi-dom	224047	102	301	1.30985e-28	111.964	COG1122	EcfA2	-	-	Energy-coupling factor transporter ATP-binding protein EcfA2	[Inorganic ion transport and metabolism, General function prediction only]
Q#1511	EGY32629	specific	226223	1	235	1.39897e-149	419.298	COG3700	AphA	-	cl21460	Acid phosphatase (class B)	[Inorganic ion transport and metabolism, General function prediction only]
Q#644	EGY32407	specific	225476	1	90	2.80135e-55	168.423	COG2924	YggX	-	cl01104	Fe-S cluster biosynthesis and repair protein YggX	[Inorganic ion transport and metabolism, Posttranslational modification, protein turnover, chaperones]
Q#872	EGY34628	specific	223116	20	459	1.21715e-72	238	COG0038	ClcA	-	cl02915	H+/Cl- antiporter ClcA	[Inorganic ion transport and metabolism]
Q#1997	EGY33239	specific	223131	1	305	5.00058e-82	252.559	COG0053	FieF	-	cl00316	Divalent metal cation (Fe/Co/Zn/Cd) transporter	[Inorganic ion transport and metabolism]
Q#3	EGY33297	multi-dom	223246	1	487	3.248e-130	389.753	COG0168	TrkG	-	-	Trk-type K+ transport system, membrane component	[Inorganic ion transport and metabolism]
Q#290	EGY34387	specific	223365	1	203	4.1966e-84	251.547	COG0288	CynT	-	cl00391	Carbonic anhydrase	[Inorganic ion transport and metabolism]
Q#1225	EGY33517	specific	223383	1	399	1.97839e-87	270.609	COG0306	PitA	-	cl00396	Phosphate/sulfate permease	[Inorganic ion transport and metabolism]
Q#1018	EGY34007	specific	223387	1	196	5.33984e-16	72.3938	COG0310	CbiM	-	cl21488	ABC-type Co2+ transport system, permease component	[Inorganic ion transport and metabolism]
Q#759	EGY33383	multi-dom	223446	3	147	1.60696e-15	72.4508	COG0369	CysJ	C	-	Sulfite reductase, alpha subunit (flavoprotein)	[Inorganic ion transport and metabolism]
Q#253	EGY34350	non-specific	223603	369	464	0.00134906	38.799	COG0529	CysC	C	cl21455	Adenylylsulfate kinase or related kinase	[Inorganic ion transport and metabolism]
Q#1145	EGY35353	non-specific	223603	98	141	0.00229718	38.0286	COG0529	CysC	C	cl21455	Adenylylsulfate kinase or related kinase	[Inorganic ion transport and metabolism]
Q#1503	EGY32621	non-specific	223603	272	313	0.00129673	38.799	COG0529	CysC	C	cl21455	Adenylylsulfate kinase or related kinase	[Inorganic ion transport and metabolism]
Q#1031	EGY34020	multi-dom	223629	16	236	8.60945e-43	147.789	COG0555	CysU	N	-	ABC-type sulfate transport system, permease component	[Inorganic ion transport and metabolism]
Q#2100	EGY32839	multi-dom	223629	1	182	1.12013e-30	113.507	COG0555	CysU	C	-	ABC-type sulfate transport system, permease component	[Inorganic ion transport and metabolism]
Q#856	EGY34612	multi-dom	223643	1	230	2.67386e-66	214.053	COG0569	TrkA	-	-	Trk K+ transport system, NAD-binding component	[Inorganic ion transport and metabolism]
Q#856	EGY34612	multi-dom	223643	248	454	2.56899e-22	94.2557	COG0569	TrkA	-	-	Trk K+ transport system, NAD-binding component	[Inorganic ion transport and metabolism]
Q#1547	EGY32665	multi-dom	223646	25	162	7.26438e-11	59.1703	COG0573	PstC	NC	-	ABC-type phosphate transport system, permease component	[Inorganic ion transport and metabolism]
Q#1670	EGY35029	specific	223671	1	315	3.58024e-91	276.899	COG0598	CorA	-	cl00459	Mg2+ and Co2+ transporter CorA	[Inorganic ion transport and metabolism]
Q#1286	EGY34716	multi-dom	223673	16	201	7.35302e-23	96.9081	COG0600	TauC	N	-	ABC-type nitrate/sulfonate/bicarbonate transport system, permease component	[Inorganic ion transport and metabolism]
Q#1951	EGY33193	multi-dom	223678	1	210	8.07411e-102	296.1	COG0605	SodA	-	-	Superoxide dismutase	[Inorganic ion transport and metabolism]
Q#452	EGY34549	specific	223680	405	481	2.74682e-14	69.1956	COG0607	PspE	-	cl00125	Rhodanese-related sulfurtransferase	[Inorganic ion transport and metabolism]
Q#752	EGY33376	specific	223680	38	146	6.89391e-23	87.6852	COG0607	PspE	-	cl00125	Rhodanese-related sulfurtransferase	[Inorganic ion transport and metabolism]
Q#982	EGY35246	specific	223680	1	108	2.77604e-23	87.6852	COG0607	PspE	-	cl00125	Rhodanese-related sulfurtransferase	[Inorganic ion transport and metabolism]
Q#134	EGY34231	non-specific	223682	67	229	0.00192312	37.6292	COG0609	FepD	N	cl00454	ABC-type Fe3+-siderophore transport system, permease component	[Inorganic ion transport and metabolism]
Q#377	EGY34474	specific	223682	1	325	6.65136e-65	210.199	COG0609	FepD	-	cl00454	ABC-type Fe3+-siderophore transport system, permease component	[Inorganic ion transport and metabolism]
Q#383	EGY34480	specific	223682	9	275	1.45015e-61	199.413	COG0609	FepD	-	cl00454	ABC-type Fe3+-siderophore transport system, permease component	[Inorganic ion transport and metabolism]
Q#1055	EGY34044	non-specific	223682	112	232	0.000246428	40.3256	COG0609	FepD	N	cl00454	ABC-type Fe3+-siderophore transport system, permease component	[Inorganic ion transport and metabolism]
Q#379	EGY34476	multi-dom	223687	22	309	2.85703e-54	182.396	COG0614	FepB	-	-	ABC-type Fe3+-hydroxamate transport system, periplasmic component	[Inorganic ion transport and metabolism]
Q#385	EGY34482	multi-dom	223687	36	304	4.57067e-32	122.305	COG0614	FepB	-	-	ABC-type Fe3+-hydroxamate transport system, periplasmic component	[Inorganic ion transport and metabolism]
Q#934	EGY33952	multi-dom	223687	1	123	1.33735e-18	78.777	COG0614	FepB	C	-	ABC-type Fe3+-hydroxamate transport system, periplasmic component	[Inorganic ion transport and metabolism]
Q#935	EGY33953	multi-dom	223687	5	200	1.56144e-31	118.067	COG0614	FepB	N	-	ABC-type Fe3+-hydroxamate transport system, periplasmic component	[Inorganic ion transport and metabolism]
Q#1061	EGY34050	multi-dom	223687	17	281	7.57824e-29	112.675	COG0614	FepB	-	-	ABC-type Fe3+-hydroxamate transport system, periplasmic component	[Inorganic ion transport and metabolism]
Q#949	EGY33967	multi-dom	223732	25	579	1.59161e-144	432.086	COG0659	SUL1	-	-	Sulfate permease or related transporter, MFS superfamily	[Inorganic ion transport and metabolism]
Q#2053	EGY32798	multi-dom	223744	220	629	5.69819e-96	302.392	COG0672	FTR1	-	-	High-affinity Fe2+/Pb2+ permease	[Inorganic ion transport and metabolism]
Q#940	EGY33958	multi-dom	223787	26	319	1.75854e-09	57.1394	COG0715	TauA	-	-	ABC-type nitrate/sulfonate/bicarbonate transport system, periplasmic component	[Inorganic ion transport and metabolism]
Q#1546	EGY32664	multi-dom	223787	1	267	0.00459679	36.7239	COG0715	TauA	C	-	ABC-type nitrate/sulfonate/bicarbonate transport system, periplasmic component	[Inorganic ion transport and metabolism]
Q#1032	EGY34021	specific	223797	22	253	5.14167e-80	243.766	COG0725	ModA	-	cl21456	ABC-type molybdate transport system, periplasmic component	[Inorganic ion transport and metabolism]
Q#2099	EGY32838	non-specific	223797	3	122	1.44798e-24	94.6936	COG0725	ModA	N	cl21456	ABC-type molybdate transport system, periplasmic component	[Inorganic ion transport and metabolism]
Q#171	EGY34268	specific	223806	1	143	3.67946e-52	164.383	COG0735	Fur	-	cl21459	Fe2+ or Zn2+ uptake regulation protein	[Inorganic ion transport and metabolism]
Q#1589	EGY33717	multi-dom	223824	2	55	3.33255e-06	41.9391	COG0753	KatE	N	-	Catalase	[Inorganic ion transport and metabolism]
Q#1839	EGY33081	multi-dom	223824	1	483	0	778.056	COG0753	KatE	-	-	Catalase	[Inorganic ion transport and metabolism]
Q#136	EGY34233	multi-dom	223874	20	290	1.53284e-118	345.514	COG0803	ZnuA	-	-	ABC-type Zn uptake system ZnuABC, Zn-binding component ZnuA	[Inorganic ion transport and metabolism]
Q#807	EGY32684	multi-dom	223874	1	327	1.14176e-50	172.174	COG0803	ZnuA	-	-	ABC-type Zn uptake system ZnuABC, Zn-binding component ZnuA	[Inorganic ion transport and metabolism]
Q#1293	EGY34723	specific	223930	1	240	8.34909e-73	224.78	COG0861	TerC	-	cl10468	Membrane protein TerC, possibly involved in tellurium resistance	[Inorganic ion transport and metabolism]
Q#723	EGY32486	non-specific	223983	50	388	1.87885e-07	51.8439	COG1055	ArsB	C	cl21473	Na+/H+ antiporter NhaD or related arsenite permease	[Inorganic ion transport and metabolism]
Q#1005	EGY35269	non-specific	223983	431	620	2.03791e-17	83.8155	COG1055	ArsB	C	cl21473	Na+/H+ antiporter NhaD or related arsenite permease	[Inorganic ion transport and metabolism]
Q#1005	EGY35269	non-specific	223983	16	209	2.23319e-09	58.3923	COG1055	ArsB	C	cl21473	Na+/H+ antiporter NhaD or related arsenite permease	[Inorganic ion transport and metabolism]
Q#1035	EGY34024	non-specific	223983	27	414	6.16829e-17	81.1191	COG1055	ArsB	-	cl21473	Na+/H+ antiporter NhaD or related arsenite permease	[Inorganic ion transport and metabolism]
Q#2066	EGY35124	non-specific	223983	275	426	0.00248925	38.7471	COG1055	ArsB	C	cl21473	Na+/H+ antiporter NhaD or related arsenite permease	[Inorganic ion transport and metabolism]
Q#133	EGY34230	multi-dom	224033	7	272	3.11398e-73	228.19	COG1108	ZnuB	-	-	ABC-type Mn2+/Zn2+ transport system, permease component	[Inorganic ion transport and metabolism]
Q#134	EGY34231	multi-dom	224033	1	272	7.08165e-73	227.42	COG1108	ZnuB	-	-	ABC-type Mn2+/Zn2+ transport system, permease component	[Inorganic ion transport and metabolism]
Q#377	EGY34474	multi-dom	224033	107	286	0.00742525	35.9754	COG1108	ZnuB	-	-	ABC-type Mn2+/Zn2+ transport system, permease component	[Inorganic ion transport and metabolism]
Q#383	EGY34480	multi-dom	224033	40	217	1.86336e-07	49.8426	COG1108	ZnuB	C	-	ABC-type Mn2+/Zn2+ transport system, permease component	[Inorganic ion transport and metabolism]
Q#1055	EGY34044	multi-dom	224033	1	258	1.75845e-71	222.797	COG1108	ZnuB	-	-	ABC-type Mn2+/Zn2+ transport system, permease component	[Inorganic ion transport and metabolism]
Q#135	EGY34232	multi-dom	224046	4	256	8.67661e-120	346.909	COG1121	ZnuC	-	-	ABC-type Mn2+/Zn2+ transport system, ATPase component	[Inorganic ion transport and metabolism]
Q#1056	EGY34045	multi-dom	224046	9	235	6.36408e-89	266.787	COG1121	ZnuC	-	-	ABC-type Mn2+/Zn2+ transport system, ATPase component	[Inorganic ion transport and metabolism]
Q#14	EGY33863	multi-dom	224099	260	504	2.54635e-17	83.4584	COG1178	FbpB	C	-	ABC-type Fe3+ transport system, permease component	[Inorganic ion transport and metabolism]
Q#482	EGY34579	multi-dom	224099	7	564	1.84502e-127	386.996	COG1178	FbpB	-	-	ABC-type Fe3+ transport system, permease component	[Inorganic ion transport and metabolism]
Q#600	EGY34903	multi-dom	224099	123	661	5.28742e-101	321.897	COG1178	FbpB	-	-	ABC-type Fe3+ transport system, permease component	[Inorganic ion transport and metabolism]
Q#600	EGY34903	multi-dom	224099	10	380	3.21267e-08	55.3388	COG1178	FbpB	N	-	ABC-type Fe3+ transport system, permease component	[Inorganic ion transport and metabolism]
Q#639	EGY32402	multi-dom	224099	1	503	4.4245e-116	355.409	COG1178	FbpB	-	-	ABC-type Fe3+ transport system, permease component	[Inorganic ion transport and metabolism]
Q#1082	EGY34071	multi-dom	224099	16	532	5.05553e-100	314.963	COG1178	FbpB	-	-	ABC-type Fe3+ transport system, permease component	[Inorganic ion transport and metabolism]
Q#1239	EGY33531	multi-dom	224099	11	235	5.0677e-21	90.7772	COG1178	FbpB	C	-	ABC-type Fe3+ transport system, permease component	[Inorganic ion transport and metabolism]
Q#1693	EGY35176	multi-dom	224099	130	670	1.20751e-138	420.123	COG1178	FbpB	-	-	ABC-type Fe3+ transport system, permease component	[Inorganic ion transport and metabolism]
Q#1105	EGY35313	specific	224139	1	269	1.89195e-102	302.306	COG1218	CysQ	-	cl00289	3'-Phosphoadenosine 5'-phosphosulfate (PAPS) 3'-phosphatase	[Inorganic ion transport and metabolism]
Q#852	EGY34783	specific	224151	123	294	1.30421e-29	114.332	COG1230	CzcD	C	cl00316	Co/Zn/Cd efflux system component	[Inorganic ion transport and metabolism]
Q#866	EGY34622	specific	224311	1	77	9.7443e-24	87.6444	COG1393	ArsC	C	cl00388	Arsenate reductase and related proteins, glutaredoxin family	[Inorganic ion transport and metabolism]
Q#1455	EGY33796	specific	224311	1	114	7.33643e-41	133.098	COG1393	ArsC	-	cl00388	Arsenate reductase and related proteins, glutaredoxin family	[Inorganic ion transport and metabolism]
Q#1546	EGY32664	specific	224381	1	276	4.25183e-115	334.591	COG1464	NlpA	-	cl21456	ABC-type metal ion transport system, periplasmic component/surface antigen	[Inorganic ion transport and metabolism]
Q#1664	EGY35023	specific	224413	1	245	2.40479e-112	325.81	COG1496	YfiH	-	cl00650	Copper oxidase (laccase) domain	[Inorganic ion transport and metabolism]
Q#353	EGY34450	specific	224445	1	161	4.3388e-81	239.494	COG1528	Ftn	-	cl00264	Ferritin	[Inorganic ion transport and metabolism]
Q#354	EGY34451	specific	224445	1	165	1.0486e-82	243.731	COG1528	Ftn	-	cl00264	Ferritin	[Inorganic ion transport and metabolism]
Q#467	EGY34564	non-specific	224470	2	118	4.42855e-32	111.312	COG1553	DsrE	-	cl00672	Sulfur relay (sulfurtransferase) complex TusBCD TusD component, DsrE family	[Inorganic ion transport and metabolism]
Q#742	EGY33366	specific	224470	1	125	2.30437e-49	155.61	COG1553	DsrE	-	cl00672	Sulfur relay (sulfurtransferase) complex TusBCD TusD component, DsrE family	[Inorganic ion transport and metabolism]
Q#159	EGY34256	multi-dom	224544	95	788	1.05618e-10	63.7535	COG1629	CirA	-	-	Outer membrane receptor proteins, mostly Fe transport	[Inorganic ion transport and metabolism]
Q#423	EGY34520	multi-dom	224544	204	543	5.77238e-21	95.725	COG1629	CirA	N	-	Outer membrane receptor proteins, mostly Fe transport	[Inorganic ion transport and metabolism]
Q#424	EGY34521	multi-dom	224544	48	188	2.60569e-17	79.1614	COG1629	CirA	C	-	Outer membrane receptor proteins, mostly Fe transport	[Inorganic ion transport and metabolism]
Q#915	EGY32319	multi-dom	224544	4	1025	3.79477e-61	222.456	COG1629	CirA	-	-	Outer membrane receptor proteins, mostly Fe transport	[Inorganic ion transport and metabolism]
Q#987	EGY35251	multi-dom	224544	45	841	9.33883e-26	112.289	COG1629	CirA	-	-	Outer membrane receptor proteins, mostly Fe transport	[Inorganic ion transport and metabolism]
Q#1334	EGY33571	multi-dom	224544	8	650	9.24669e-38	148.883	COG1629	CirA	-	-	Outer membrane receptor proteins, mostly Fe transport	[Inorganic ion transport and metabolism]
Q#1400	EGY33637	multi-dom	224544	79	870	1.4283e-36	146.957	COG1629	CirA	-	-	Outer membrane receptor proteins, mostly Fe transport	[Inorganic ion transport and metabolism]
Q#1597	EGY33725	multi-dom	224544	506	755	0.00812859	38.3303	COG1629	CirA	NC	-	Outer membrane receptor proteins, mostly Fe transport	[Inorganic ion transport and metabolism]
Q#2088	EGY32827	multi-dom	224544	5	712	6.8464e-80	272.146	COG1629	CirA	-	-	Outer membrane receptor proteins, mostly Fe transport	[Inorganic ion transport and metabolism]
Q#479	EGY34576	specific	224753	45	331	1.96085e-35	132.945	COG1840	AfuA	-	cl21456	ABC-type Fe3+ transport system, periplasmic component	[Inorganic ion transport and metabolism]
Q#480	EGY34577	specific	224753	42	329	1.28004e-60	198.044	COG1840	AfuA	-	cl21456	ABC-type Fe3+ transport system, periplasmic component	[Inorganic ion transport and metabolism]
Q#599	EGY34902	specific	224753	43	341	1.78678e-80	249.66	COG1840	AfuA	-	cl21456	ABC-type Fe3+ transport system, periplasmic component	[Inorganic ion transport and metabolism]
Q#640	EGY32403	specific	224753	39	332	4.78408e-52	175.702	COG1840	AfuA	-	cl21456	ABC-type Fe3+ transport system, periplasmic component	[Inorganic ion transport and metabolism]
Q#1694	EGY35177	specific	224753	1	234	2.72736e-66	209.214	COG1840	AfuA	N	cl21456	ABC-type Fe3+ transport system, periplasmic component	[Inorganic ion transport and metabolism]
Q#1695	EGY35178	specific	224753	45	345	4.95591e-100	300.121	COG1840	AfuA	-	cl21456	ABC-type Fe3+ transport system, periplasmic component	[Inorganic ion transport and metabolism]
Q#1340	EGY33577	specific	224826	1	419	2.85563e-59	200.589	COG1914	MntH	-	cl00456	Mn2+ and Fe2+ transporters of the NRAMP family	[Inorganic ion transport and metabolism]
Q#25	EGY33484	non-specific	224876	1	101	3.00733e-37	123.221	COG1965	CyaY	-	cl00238	Iron-binding protein CyaY, frataxin homolog	[Inorganic ion transport and metabolism]
Q#1978	EGY33220	specific	224943	37	191	5.97309e-70	213.037	COG2032	SodC	-	cl00891	Cu/Zn superoxide dismutase	[Inorganic ion transport and metabolism]
Q#2003	EGY33245	specific	225027	10	283	6.6035e-98	291.093	COG2116	FocA	-	cl00927	Formate/nitrite transporter FocA, FNT family	[Inorganic ion transport and metabolism]
Q#1633	EGY34992	multi-dom	225039	18	88	0.00013037	37.9027	COG2128	YciW	C	-	Alkylhydroperoxidase family enzyme, contains CxxC motif	[Inorganic ion transport and metabolism]
Q#196	EGY34293	specific	225125	12	332	3.3657e-80	249.234	COG2215	RcnA	-	cl21514	ABC-type nickel/cobalt efflux system, permease component RcnA	[Inorganic ion transport and metabolism]
Q#1908	EGY33150	multi-dom	225127	1	70	1.55266e-11	57.9922	COG2217	ZntA	C	-	Cation transport ATPase	[Inorganic ion transport and metabolism]
Q#1909	EGY33151	multi-dom	225127	1	715	0	781.012	COG2217	ZntA	-	-	Cation transport ATPase	[Inorganic ion transport and metabolism]
Q#1908	EGY33150	specific	225328	1	70	5.81747e-19	73.9545	COG2608	CopZ	-	cl00207	Copper chaperone CopZ	[Inorganic ion transport and metabolism]
Q#1909	EGY33151	specific	225328	1	67	1.29082e-15	72.7989	COG2608	CopZ	-	cl00207	Copper chaperone CopZ	[Inorganic ion transport and metabolism]
Q#1155	EGY35363	non-specific	225403	1	133	3.19154e-35	120.529	COG2847	COG2847	-	cl01071	Copper(I)-binding protein	[Inorganic ion transport and metabolism]
Q#137	EGY34234	specific	225472	1	109	4.32557e-62	187.221	COG2920	DsrC	-	cl01101	Sulfur relay (sulfurtransferase) protein, DsrC/TusE family	[Inorganic ion transport and metabolism]
Q#741	EGY33365	specific	225475	1	120	1.3045e-39	130.523	COG2923	DsrF	-	cl00672	Sulfur relay (sulfurtransferase) complex TusC component, DsrF/TusC family	[Inorganic ion transport and metabolism]
Q#1995	EGY33237	specific	225566	1	258	1.97275e-118	341.995	COG3022	YaaA	-	cl01143	Cytoplasmic iron level regulating protein YaaA, DUF328/UPF0246 family	[Inorganic ion transport and metabolism]
Q#1227	EGY33519	multi-dom	225569	1	377	7.9283e-75	240.806	COG3025	PPPi	-	-	Inorganic triphosphatase YgiF, contains CYTH and CHAD domains	[Inorganic ion transport and metabolism]
Q#1970	EGY33212	specific	225838	3	321	4.31335e-81	250.792	COG3301	NrfD	-	cl21513	Formate-dependent nitrite reductase, membrane component NrfD	[Inorganic ion transport and metabolism]
Q#1967	EGY33209	multi-dom	225840	1	502	0	760.21	COG3303	NrfA	-	-	Formate-dependent nitrite reductase, periplasmic cytochrome c552 subunit	[Inorganic ion transport and metabolism]
Q#380	EGY34477	multi-dom	226628	2	65	1.50851e-12	60.0466	COG4148	ModC	N	-	ABC-type molybdate transport system, ATPase component	[Inorganic ion transport and metabolism]
Q#1030	EGY34019	multi-dom	226628	1	351	0	563.117	COG4148	ModC	-	-	ABC-type molybdate transport system, ATPase component	[Inorganic ion transport and metabolism]
Q#600	EGY34903	non-specific	226629	468	662	5.32232e-12	64.9457	COG4149	ModC	-	cl00427	ABC-type molybdate transport system, permease component	[Inorganic ion transport and metabolism]
Q#639	EGY32402	non-specific	226629	46	233	1.22575e-16	78.4277	COG4149	ModC	-	cl00427	ABC-type molybdate transport system, permease component	[Inorganic ion transport and metabolism]
Q#639	EGY32402	non-specific	226629	303	500	1.43372e-16	78.0425	COG4149	ModC	-	cl00427	ABC-type molybdate transport system, permease component	[Inorganic ion transport and metabolism]
Q#1031	EGY34020	specific	226629	11	236	3.3841e-93	276.035	COG4149	ModC	-	cl00427	ABC-type molybdate transport system, permease component	[Inorganic ion transport and metabolism]
Q#1238	EGY33530	non-specific	226629	53	253	1.55317e-19	83.4353	COG4149	ModC	-	cl00427	ABC-type molybdate transport system, permease component	[Inorganic ion transport and metabolism]
Q#1476	EGY33817	non-specific	226629	9	148	3.66243e-05	42.219	COG4149	ModC	C	cl00427	ABC-type molybdate transport system, permease component	[Inorganic ion transport and metabolism]
Q#1693	EGY35176	non-specific	226629	474	670	3.45645e-12	65.3309	COG4149	ModC	-	cl00427	ABC-type molybdate transport system, permease component	[Inorganic ion transport and metabolism]
Q#2100	EGY32839	non-specific	226629	57	182	1.2526e-18	79.5833	COG4149	ModC	C	cl00427	ABC-type molybdate transport system, permease component	[Inorganic ion transport and metabolism]
Q#136	EGY34233	non-specific	226908	20	258	1.42041e-28	111.744	COG4531	ZnuA	-	cl00262	ABC-type Zn2+ transport system, periplasmic component/surface adhesin	[Inorganic ion transport and metabolism]
Q#807	EGY32684	non-specific	226908	1	339	4.58767e-134	387.547	COG4531	ZnuA	-	cl00262	ABC-type Zn2+ transport system, periplasmic component/surface adhesin	[Inorganic ion transport and metabolism]
Q#2072	EGY35130	multi-dom	226910	1	286	1.45984e-160	452.226	COG4535	CorC	-	-	Mg2+ and Co2+ transporter CorC, contains CBS pair and CorC-HlyC domains	[Inorganic ion transport and metabolism]
Q#1143	EGY35351	multi-dom	226911	5	420	0	605.83	COG4536	CorB	-	-	Mg2+ and Co2+ transporter CorB, contains DUF21, CBS pair, and CorC-HlyC domains	[Inorganic ion transport and metabolism]
Q#379	EGY34476	non-specific	226928	1	276	6.45412e-25	101.702	COG4558	ChuT	-	cl00262	ABC-type hemin transport system, periplasmic component	[Inorganic ion transport and metabolism]
Q#385	EGY34482	non-specific	226928	26	287	3.54149e-10	58.9451	COG4558	ChuT	-	cl00262	ABC-type hemin transport system, periplasmic component	[Inorganic ion transport and metabolism]
Q#1058	EGY34047	multi-dom	226963	1	251	1.31635e-125	359.698	COG4604	CeuD	-	-	ABC-type enterochelin transport system, ATPase component	[Inorganic ion transport and metabolism]
Q#1059	EGY34048	non-specific	226964	2	313	3.12243e-102	304.964	COG4605	CeuC	-	cl00454	ABC-type enterochelin transport system, permease component	[Inorganic ion transport and metabolism]
Q#1060	EGY34049	non-specific	226965	5	319	2.20934e-113	334.262	COG4606	CeuB	-	cl00454	ABC-type enterochelin transport system, permease component	[Inorganic ion transport and metabolism]
Q#935	EGY33953	non-specific	226966	5	174	1.10489e-06	46.9657	COG4607	CeuA	N	cl00262	ABC-type enterochelin transport system, periplasmic component	[Inorganic ion transport and metabolism]
Q#1061	EGY34050	specific	226966	15	297	4.10622e-108	319.687	COG4607	CeuA	-	cl00262	ABC-type enterochelin transport system, periplasmic component	[Inorganic ion transport and metabolism]
Q#1020	EGY34009	multi-dom	226970	1	207	1.95179e-26	101.861	COG4619	FetA	-	-	ABC-type iron transport system FetAB, ATPase component	[Inorganic ion transport and metabolism]
Q#381	EGY34478	multi-dom	227112	2	795	0	588.607	COG4771	FepA	-	-	Outer membrane receptor for ferrienterochelin and colicins	[Inorganic ion transport and metabolism]
Q#389	EGY34486	multi-dom	227112	15	181	6.1238e-23	95.1666	COG4771	FepA	N	-	Outer membrane receptor for ferrienterochelin and colicins	[Inorganic ion transport and metabolism]
Q#1485	EGY33826	specific	226366	13	72	1.38465e-08	46.153	COG3847	Flp	-	cl01585	Flp pilus assembly protein, pilin Flp	[Intracellular trafficking, secretion, and vesicular transport, Extracellular structures]
Q#1497	EGY33838	multi-dom	227296	11	80	0.00253026	37.8277	COG4961	TadG	C	-	Flp pilus assembly protein TadG	[Intracellular trafficking, secretion, and vesicular transport, Extracellular structures]
Q#1491	EGY33832	specific	227297	35	379	4.69764e-165	471.443	COG4962	CpaF	-	cl21455	Pilus assembly protein, ATPase of CpaF family	[Intracellular trafficking, secretion, and vesicular transport, Extracellular structures]
Q#1490	EGY33831	multi-dom	227298	1	373	7.17395e-80	251.567	COG4963	CpaE	-	-	Flp pilus assembly protein, ATPase CpaE	[Intracellular trafficking, secretion, and vesicular transport, Extracellular structures]
Q#1488	EGY33829	multi-dom	227299	17	460	2.92177e-115	348.961	COG4964	CpaC	-	-	Flp pilus assembly protein, secretin CpaC	[Intracellular trafficking, secretion, and vesicular transport, Extracellular structures]
Q#1492	EGY33833	specific	227300	60	295	1.22011e-82	253.798	COG4965	TadB	N	cl19503	Flp pilus assembly protein TadB	[Intracellular trafficking, secretion, and vesicular transport, Extracellular structures]
Q#1494	EGY33835	multi-dom	227343	6	253	1.51245e-47	159.907	COG5010	TadD	-	-	Flp pilus assembly protein TadD, contains TPR repeats	[Intracellular trafficking, secretion, and vesicular transport, Extracellular structures]
Q#1832	EGY33074	multi-dom	227614	2	377	1.73375e-13	70.6709	COG5295	Hia	N	-	Autotransporter adhesin	[Intracellular trafficking, secretion, and vesicular transport, Extracellular structures]
Q#1533	EGY32651	multi-dom	226032	111	667	0	566.188	COG3501	VgrG	-	-	Uncharacterized conserved protein, implicated in type VI secretion and phage assembly	[Intracellular trafficking, secretion, and vesicular transport, Mobilome: prophages, transposons, General function prediction only]
Q#899	EGY34655	multi-dom	223279	1	432	3.09687e-179	510.996	COG0201	SecY	-	-	Preprotein translocase subunit SecY	[Intracellular trafficking, secretion, and vesicular transport]
Q#1401	EGY33638	multi-dom	223418	28	328	7.62223e-115	337.635	COG0341	SecF	-	-	Preprotein translocase subunit SecF	[Intracellular trafficking, secretion, and vesicular transport]
Q#1402	EGY33639	multi-dom	223419	75	616	0	571.643	COG0342	SecD	-	-	Preprotein translocase subunit SecD	[Intracellular trafficking, secretion, and vesicular transport]
Q#1145	EGY35353	multi-dom	223615	1	435	0	672.322	COG0541	Ffh	-	-	Signal recognition particle GTPase	[Intracellular trafficking, secretion, and vesicular transport]
Q#1503	EGY32621	multi-dom	223626	153	474	1.67259e-157	453.251	COG0552	FtsY	-	-	Signal recognition particle GTPase	[Intracellular trafficking, secretion, and vesicular transport]
Q#1020	EGY34009	non-specific	223703	33	54	0.00332773	36.1978	COG0630	VirB11	NC	cl21455	Type IV secretory pathway ATPase VirB11/Archaellum biosynthesis ATPase	[Intracellular trafficking, secretion, and vesicular transport]
Q#1613	EGY34781	specific	223703	28	331	2.12073e-73	231.879	COG0630	VirB11	-	cl21455	Type IV secretory pathway ATPase VirB11/Archaellum biosynthesis ATPase	[Intracellular trafficking, secretion, and vesicular transport]
Q#2034	EGY32518	non-specific	223703	9	79	0.0035737	33.8866	COG0630	VirB11	NC	cl21455	Type IV secretory pathway ATPase VirB11/Archaellum biosynthesis ATPase	[Intracellular trafficking, secretion, and vesicular transport]
Q#2101	EGY32840	non-specific	223703	15	42	0.00220626	36.583	COG0630	VirB11	NC	cl21455	Type IV secretory pathway ATPase VirB11/Archaellum biosynthesis ATPase	[Intracellular trafficking, secretion, and vesicular transport]
Q#1168	EGY35376	multi-dom	223726	2	890	0	1239.41	COG0653	SecA	-	-	Preprotein translocase subunit SecA (ATPase, RNA helicase)	[Intracellular trafficking, secretion, and vesicular transport]
Q#1991	EGY33233	specific	223753	86	195	1.77799e-20	86.2049	COG0681	LepB	-	cl10465	Signal peptidase I	[Intracellular trafficking, secretion, and vesicular transport]
Q#1757	EGY32999	specific	223762	58	130	7.02025e-17	70.4746	COG0690	SecE	-	cl00481	Preprotein translocase subunit SecE	[Intracellular trafficking, secretion, and vesicular transport]
Q#1117	EGY35325	specific	223876	1	253	2.21797e-92	275.268	COG0805	TatC	-	cl00521	Sec-independent protein secretion pathway component TatC	[Intracellular trafficking, secretion, and vesicular transport]
Q#1142	EGY35350	specific	223881	1	140	9.33023e-36	124.732	COG0811	TolQ	N	cl00568	Biopolymer transport protein ExbB/TolQ	[Intracellular trafficking, secretion, and vesicular transport]
Q#1352	EGY33589	specific	223881	10	225	6.78936e-77	233.358	COG0811	TolQ	-	cl00568	Biopolymer transport protein ExbB/TolQ	[Intracellular trafficking, secretion, and vesicular transport]
Q#1355	EGY33592	multi-dom	223893	10	424	4.42569e-149	433.416	COG0823	TolB	-	-	Periplasmic component of the Tol biopolymer transport system	[Intracellular trafficking, secretion, and vesicular transport]
Q#1141	EGY35349	specific	223917	2	127	2.85508e-33	115.792	COG0848	ExbD	-	cl00537	Biopolymer transport protein ExbD	[Intracellular trafficking, secretion, and vesicular transport]
Q#1353	EGY33590	specific	223917	1	140	4.58852e-29	104.621	COG0848	ExbD	-	cl00537	Biopolymer transport protein ExbD	[Intracellular trafficking, secretion, and vesicular transport]
Q#1431	EGY33772	specific	224233	1	87	1.26094e-14	64.2082	COG1314	SecG	-	cl09123	Preprotein translocase subunit SecG	[Intracellular trafficking, secretion, and vesicular transport]
Q#1115	EGY35323	specific	224739	1	75	7.12173e-16	66.6395	COG1826	TatA	C	cl00788	Sec-independent protein translocase protein TatA	[Intracellular trafficking, secretion, and vesicular transport]
Q#1116	EGY35324	specific	224739	1	101	6.26236e-22	86.6699	COG1826	TatA	-	cl00788	Sec-independent protein translocase protein TatA	[Intracellular trafficking, secretion, and vesicular transport]
Q#1403	EGY33640	specific	224775	1	99	1.07604e-35	118.889	COG1862	YajC	-	cl00806	Preprotein translocase subunit YajC	[Intracellular trafficking, secretion, and vesicular transport]
Q#753	EGY33377	specific	224863	9	150	2.75659e-70	212.162	COG1952	SecB	-	cl00251	Preprotein translocase subunit SecB	[Intracellular trafficking, secretion, and vesicular transport]
Q#227	EGY34324	non-specific	225138	334	492	1.60693e-09	57.085	COG2229	Srp102	-	cl21455	Signal recognition particle receptor subunit beta, a GTPase	[Intracellular trafficking, secretion, and vesicular transport]
Q#1072	EGY34061	non-specific	225138	13	167	7.12379e-07	48.2254	COG2229	Srp102	-	cl21455	Signal recognition particle receptor subunit beta, a GTPase	[Intracellular trafficking, secretion, and vesicular transport]
Q#1291	EGY34721	non-specific	225138	13	196	8.10936e-08	51.307	COG2229	Srp102	-	cl21455	Signal recognition particle receptor subunit beta, a GTPase	[Intracellular trafficking, secretion, and vesicular transport]
Q#1988	EGY33230	non-specific	225138	214	382	0.00110199	38.5954	COG2229	Srp102	-	cl21455	Signal recognition particle receptor subunit beta, a GTPase	[Intracellular trafficking, secretion, and vesicular transport]
Q#1992	EGY33234	non-specific	225138	19	167	0.000132653	42.0622	COG2229	Srp102	-	cl21455	Signal recognition particle receptor subunit beta, a GTPase	[Intracellular trafficking, secretion, and vesicular transport]
Q#707	EGY32470	multi-dom	225463	11	1293	0	1038.85	COG2911	TamB	-	-	Autotransporter translocation and assembly factor TamB	[Intracellular trafficking, secretion, and vesicular transport]
Q#1612	EGY34780	multi-dom	225499	39	367	6.67469e-62	204.626	COG2948	VirB10	-	-	Type IV secretory pathway, VirB10 components	[Intracellular trafficking, secretion, and vesicular transport]
Q#1959	EGY33201	specific	225656	1	65	5.44366e-24	86.7225	COG3114	CcmD	-	cl11475	Heme exporter protein D	[Intracellular trafficking, secretion, and vesicular transport]
Q#818	EGY32695	multi-dom	225982	3	538	1.09704e-141	431.418	COG3451	VirB4	N	-	Type IV secretory pathway, VirB4 component	[Intracellular trafficking, secretion, and vesicular transport]
Q#1605	EGY34773	multi-dom	225982	126	921	0	593.202	COG3451	VirB4	-	-	Type IV secretory pathway, VirB4 component	[Intracellular trafficking, secretion, and vesicular transport]
Q#1611	EGY34779	non-specific	226035	5	282	2.31447e-35	129.062	COG3504	VirB9	-	cl11423	Type IV secretory pathway, VirB9 components	[Intracellular trafficking, secretion, and vesicular transport]
Q#2039	EGY34936	multi-dom	226036	28	364	1.07119e-56	196.454	COG3505	VirD4	N	-	Type IV secretory pathway, VirD4 component, TraG/TraD family ATPase	[Intracellular trafficking, secretion, and vesicular transport]
Q#1605	EGY34773	non-specific	226225	11	98	0.000683578	39.2849	COG3702	VirB3	-	cl01501	Type IV secretory pathway, VirB3 components	[Intracellular trafficking, secretion, and vesicular transport]
Q#1608	EGY34776	non-specific	226227	1	306	0.000500694	40.1402	COG3704	VirB6	-	cl01503	Type IV secretory pathway, VirB6 components	[Intracellular trafficking, secretion, and vesicular transport]
Q#2098	EGY32837	non-specific	226227	75	162	5.97628e-05	42.4514	COG3704	VirB6	NC	cl01503	Type IV secretory pathway, VirB6 components	[Intracellular trafficking, secretion, and vesicular transport]
Q#1610	EGY34778	non-specific	226259	24	228	2.47127e-35	126.72	COG3736	VirB8	-	cl01500	Type IV secretory pathway, component VirB8	[Intracellular trafficking, secretion, and vesicular transport]
Q#1366	EGY33603	multi-dom	227132	5	234	8.22159e-41	140.239	COG4795	PulJ	-	-	Type II secretory pathway, component PulJ	[Intracellular trafficking, secretion, and vesicular transport]
Q#1181	EGY35389	multi-dom	227133	22	437	4.33731e-126	384.893	COG4796	HofQ	N	-	Type II secretory pathway, component HofQ	[Intracellular trafficking, secretion, and vesicular transport]
Q#736	EGY33360	multi-dom	225186	29	62	1.82087e-05	45.5226	COG2303	BetA	C	-	Choline dehydrogenase or related flavoprotein	[Lipid transport and metabolism, General function prediction only]
Q#536	EGY33925	multi-dom	223959	4	241	4.87337e-62	196.962	COG1028	FabG	-	-	NAD(P)-dependent dehydrogenase, short-chain alcohol dehydrogenase family	[Lipid transport and metabolism, Secondary metabolites biosynthesis, transport and catabolism, General function prediction only]
Q#938	EGY33956	multi-dom	223959	7	277	3.81802e-45	154.59	COG1028	FabG	-	-	NAD(P)-dependent dehydrogenase, short-chain alcohol dehydrogenase family	[Lipid transport and metabolism, Secondary metabolites biosynthesis, transport and catabolism, General function prediction only]
Q#1810	EGY33052	multi-dom	223959	1	239	1.52056e-75	231.63	COG1028	FabG	-	-	NAD(P)-dependent dehydrogenase, short-chain alcohol dehydrogenase family	[Lipid transport and metabolism, Secondary metabolites biosynthesis, transport and catabolism, General function prediction only]
Q#522	EGY33911	specific	223314	1	84	1.1702e-07	44.2076	COG0236	AcpP	-	cl09936	Acyl carrier protein	[Lipid transport and metabolism, Secondary metabolites biosynthesis, transport and catabolism]
Q#523	EGY33912	specific	223314	1	78	2.53672e-10	51.5264	COG0236	AcpP	-	cl09936	Acyl carrier protein	[Lipid transport and metabolism, Secondary metabolites biosynthesis, transport and catabolism]
Q#1811	EGY33053	specific	223314	1	76	2.34652e-20	77.72	COG0236	AcpP	-	cl09936	Acyl carrier protein	[Lipid transport and metabolism, Secondary metabolites biosynthesis, transport and catabolism]
Q#534	EGY33923	multi-dom	223381	10	403	6.79365e-85	267.204	COG0304	FabB	-	-	3-oxoacyl-(acyl-carrier-protein) synthase	[Lipid transport and metabolism, Secondary metabolites biosynthesis, transport and catabolism]
Q#537	EGY33926	multi-dom	223381	1	413	4.30879e-146	424.751	COG0304	FabB	-	-	3-oxoacyl-(acyl-carrier-protein) synthase	[Lipid transport and metabolism, Secondary metabolites biosynthesis, transport and catabolism]
Q#913	EGY32317	multi-dom	223381	1	405	5.40405e-172	490.235	COG0304	FabB	-	-	3-oxoacyl-(acyl-carrier-protein) synthase	[Lipid transport and metabolism, Secondary metabolites biosynthesis, transport and catabolism]
Q#97	EGY34194	multi-dom	223395	15	516	1.96416e-160	469.635	COG0318	CaiC	-	-	Acyl-CoA synthetase (AMP-forming)/AMP-acid ligase II	[Lipid transport and metabolism, Secondary metabolites biosynthesis, transport and catabolism]
Q#98	EGY34195	multi-dom	223395	2	48	4.46141e-14	64.4048	COG0318	CaiC	N	-	Acyl-CoA synthetase (AMP-forming)/AMP-acid ligase II	[Lipid transport and metabolism, Secondary metabolites biosynthesis, transport and catabolism]
Q#175	EGY34272	multi-dom	223395	13	470	5.62252e-102	317.481	COG0318	CaiC	-	-	Acyl-CoA synthetase (AMP-forming)/AMP-acid ligase II	[Lipid transport and metabolism, Secondary metabolites biosynthesis, transport and catabolism]
Q#348	EGY34445	multi-dom	223395	618	1151	1.09854e-97	322.874	COG0318	CaiC	-	-	Acyl-CoA synthetase (AMP-forming)/AMP-acid ligase II	[Lipid transport and metabolism, Secondary metabolites biosynthesis, transport and catabolism]
Q#524	EGY33913	multi-dom	223395	17	444	7.65203e-35	136.437	COG0318	CaiC	-	-	Acyl-CoA synthetase (AMP-forming)/AMP-acid ligase II	[Lipid transport and metabolism, Secondary metabolites biosynthesis, transport and catabolism]
Q#526	EGY33915	multi-dom	223395	1	453	4.4396e-35	135.667	COG0318	CaiC	-	-	Acyl-CoA synthetase (AMP-forming)/AMP-acid ligase II	[Lipid transport and metabolism, Secondary metabolites biosynthesis, transport and catabolism]
Q#1808	EGY33050	multi-dom	223409	1	316	8.77763e-153	434.346	COG0332	FabH	-	-	3-oxoacyl-	[Lipid transport and metabolism]
Q#2142	EGY32881	multi-dom	223696	1	259	4.39531e-155	435.49	COG0623	FabI	-	-	Enoyl-	[Lipid transport and metabolism]
Q#994	EGY35258	specific	223099	6	238	5.43064e-135	382.791	COG0020	UppS	-	cl00230	Undecaprenyl pyrophosphate synthase	[Lipid transport and metabolism]
Q#348	EGY34445	specific	223282	428	592	1.09539e-19	89.9704	COG0204	PlsC	C	cl17185	1-acyl-sn-glycerol-3-phosphate acyltransferase	[Lipid transport and metabolism]
Q#521	EGY33910	specific	223282	16	228	2.68689e-15	71.866	COG0204	PlsC	-	cl17185	1-acyl-sn-glycerol-3-phosphate acyltransferase	[Lipid transport and metabolism]
Q#1007	EGY35271	specific	223282	8	206	9.07071e-19	80.7256	COG0204	PlsC	-	cl17185	1-acyl-sn-glycerol-3-phosphate acyltransferase	[Lipid transport and metabolism]
Q#1636	EGY34995	specific	223282	269	493	3.07913e-13	69.1696	COG0204	PlsC	-	cl17185	1-acyl-sn-glycerol-3-phosphate acyltransferase	[Lipid transport and metabolism]
Q#2009	EGY33251	specific	223282	26	246	6.91583e-39	136.965	COG0204	PlsC	-	cl17185	1-acyl-sn-glycerol-3-phosphate acyltransferase	[Lipid transport and metabolism]
Q#1622	EGY34981	specific	223323	2	158	6.64278e-93	269.064	COG0245	IspF	-	cl10030	2C-methyl-D-erythritol 2,4-cyclodiphosphate synthase	[Lipid transport and metabolism]
Q#1809	EGY33051	specific	223408	1	309	9.83333e-141	403.206	COG0331	FabD	-	cl08282	Malonyl CoA-acyl carrier protein transacylase	[Lipid transport and metabolism]
Q#1947	EGY33189	specific	223421	1	193	1.9207e-75	227.906	COG0344	PlsY	-	cl00410	Phospholipid biosynthesis protein PlsY, probable glycerol-3-phosphate acyltransferase	[Lipid transport and metabolism]
Q#1807	EGY33049	specific	223493	3	339	9.93622e-139	400.03	COG0416	PlsX	-	cl17212	Fatty acid/phospholipid biosynthesis enzyme	[Lipid transport and metabolism]
Q#1872	EGY33114	multi-dom	223516	1	448	0	685.152	COG0439	AccC	-	-	Biotin carboxylase	[Lipid transport and metabolism]
Q#1006	EGY35270	specific	223632	14	201	9.0714e-26	99.3688	COG0558	PgsA	-	cl00453	Phosphatidylglycerophosphate synthase	[Lipid transport and metabolism]
Q#1711	EGY35194	specific	223632	1	183	5.6445e-41	138.659	COG0558	PgsA	-	cl00453	Phosphatidylglycerophosphate synthase	[Lipid transport and metabolism]
Q#995	EGY35259	specific	223648	1	288	4.56535e-53	175.967	COG0575	CdsA	-	cl21502	CDP-diglyceride synthetase	[Lipid transport and metabolism]
Q#1644	EGY35003	multi-dom	223657	30	359	1.15541e-59	195.053	COG0584	UgpQ	-	-	Glycerophosphoryl diester phosphodiesterase	[Lipid transport and metabolism]
Q#329	EGY34426	multi-dom	223730	64	369	0.000270649	41.4592	COG0657	Aes	-	-	Acetyl esterase/lipase	[Lipid transport and metabolism]
Q#692	EGY32455	multi-dom	223730	121	244	1.05887e-15	76.8975	COG0657	Aes	NC	-	Acetyl esterase/lipase	[Lipid transport and metabolism]
Q#81	EGY34178	multi-dom	223743	41	240	8.20072e-12	61.7223	COG0671	PgpB	-	-	Membrane-associated phospholipid phosphatase	[Lipid transport and metabolism]
Q#1799	EGY33041	specific	223760	14	283	1.09095e-80	246.431	COG0688	Psd	-	cl03656	Phosphatidylserine decarboxylase	[Lipid transport and metabolism]
Q#993	EGY35257	multi-dom	223814	30	424	0	610.753	COG0743	Dxr	-	-	1-deoxy-D-xylulose 5-phosphate reductoisomerase	[Lipid transport and metabolism]
Q#29	EGY33988	specific	223832	1	295	0	505.225	COG0761	IspH	-	cl19123	4-Hydroxy-3-methylbut-2-enyl diphosphate reductase IspH	[Lipid transport and metabolism]
Q#468	EGY34565	specific	223835	17	172	2.93628e-50	160.882	COG0764	FabA	-	cl00509	3-hydroxymyristoyl/3-hydroxydecanoyl-(acyl carrier protein) dehydratase	[Lipid transport and metabolism]
Q#524	EGY33913	non-specific	223835	463	548	1.54245e-05	43.7816	COG0764	FabA	N	cl00509	3-hydroxymyristoyl/3-hydroxydecanoyl-(acyl carrier protein) dehydratase	[Lipid transport and metabolism]
Q#1000	EGY35264	specific	223835	1	134	6.61942e-63	191.313	COG0764	FabA	-	cl00509	3-hydroxymyristoyl/3-hydroxydecanoyl-(acyl carrier protein) dehydratase	[Lipid transport and metabolism]
Q#319	EGY34416	specific	223848	1	289	1.6504e-176	492.599	COG0777	AccD	-	cl21466	Acetyl-CoA carboxylase beta subunit	[Lipid transport and metabolism]
Q#624	EGY32387	specific	223888	3	117	6.13836e-33	113.076	COG0818	DgkA	-	cl00526	Diacylglycerol kinase	[Lipid transport and metabolism]
Q#1926	EGY33168	specific	223891	7	367	0	603.823	COG0821	IspG	-	cl19500	4-hydroxy-3-methylbut-2-en-1-yl diphosphate synthase IspG/GcpE	[Lipid transport and metabolism]
Q#530	EGY33919	specific	223894	9	123	1.03715e-20	82.6768	COG0824	FadM	-	cl00509	Acyl-CoA thioesterase FadM	[Lipid transport and metabolism]
Q#1351	EGY33588	specific	223894	1	129	1.78435e-45	146.62	COG0824	FadM	-	cl00509	Acyl-CoA thioesterase FadM	[Lipid transport and metabolism]
Q#218	EGY34315	specific	223895	2	316	0	580.375	COG0825	AccA	-	cl21466	Acetyl-CoA carboxylase alpha subunit	[Lipid transport and metabolism]
Q#1835	EGY33077	multi-dom	223953	4	595	0	730.656	COG1022	FAA1	-	-	Long-chain acyl-CoA synthetase (AMP-forming)	[Lipid transport and metabolism]
Q#988	EGY35252	non-specific	224056	75	381	5.85693e-23	100.236	COG1133	SbmA	N	cl00549	ABC-type long-chain fatty acid transport system, fused permease and ATPase components	[Lipid transport and metabolism]
Q#2089	EGY32828	non-specific	224056	72	348	8.95216e-09	56.3228	COG1133	SbmA	N	cl00549	ABC-type long-chain fatty acid transport system, fused permease and ATPase components	[Lipid transport and metabolism]
Q#1621	EGY34980	specific	224132	3	228	1.33182e-100	294.509	COG1211	IspD	-	cl11394	2-C-methyl-D-erythritol 4-phosphate cytidylyltransferase	[Lipid transport and metabolism]
Q#582	EGY34885	specific	224186	13	159	4.42304e-41	137.087	COG1267	PgpA	-	cl00559	Phosphatidylglycerophosphatase A	[Lipid transport and metabolism]
Q#324	EGY34421	multi-dom	224419	46	485	9.53559e-94	293.684	COG1502	Cls	-	-	Phosphatidylserine/phosphatidylglycerophosphate/cardiolipin synthase or related enzyme	[Lipid transport and metabolism]
Q#1749	EGY32991	multi-dom	224419	7	442	2.94399e-70	231.282	COG1502	Cls	-	-	Phosphatidylserine/phosphatidylglycerophosphate/cardiolipin synthase or related enzyme	[Lipid transport and metabolism]
Q#109	EGY34206	specific	224476	6	310	1.41558e-114	336.176	COG1560	HtrB	-	cl17185	Lauroyl/myristoyl acyltransferase	[Lipid transport and metabolism]
Q#180	EGY34277	specific	224476	16	318	1.42558e-120	351.969	COG1560	HtrB	-	cl17185	Lauroyl/myristoyl acyltransferase	[Lipid transport and metabolism]
Q#922	EGY32326	specific	224523	4	151	2.29352e-65	199.034	COG1607	YciA	-	cl00509	Acyl-CoA hydrolase	[Lipid transport and metabolism]
Q#87	EGY34184	multi-dom	224857	1	286	4.92805e-151	427.495	COG1946	TesB	-	-	Acyl-CoA thioesterase	[Lipid transport and metabolism]
Q#1221	EGY33513	multi-dom	224858	22	294	5.00016e-119	346.555	COG1947	IspE	-	-	4-diphosphocytidyl-2C-methyl-D-erythritol kinase	[Lipid transport and metabolism]
Q#388	EGY34485	non-specific	224978	74	226	0.00511998	36.6004	COG2067	FadL	N	cl21487	Long-chain fatty acid transport protein	[Lipid transport and metabolism]
Q#1296	EGY34726	specific	224978	2	477	3.0231e-137	405.622	COG2067	FadL	-	cl21487	Long-chain fatty acid transport protein	[Lipid transport and metabolism]
Q#1334	EGY33571	non-specific	224978	399	589	2.77945e-07	52.0084	COG2067	FadL	N	cl21487	Long-chain fatty acid transport protein	[Lipid transport and metabolism]
Q#1784	EGY33026	multi-dom	224995	22	306	8.10478e-88	267.147	COG2084	MmsB	-	-	3-hydroxyisobutyrate dehydrogenase or related beta-hydroxyacid dehydrogenase	[Lipid transport and metabolism]
Q#1741	EGY32983	multi-dom	225176	5	307	6.64237e-66	211.077	COG2267	PldB	-	-	Lysophospholipase, alpha-beta hydrolase superfamily	[Lipid transport and metabolism]
Q#1800	EGY33042	multi-dom	225176	3	217	3.77931e-43	148.289	COG2267	PldB	C	-	Lysophospholipase, alpha-beta hydrolase superfamily	[Lipid transport and metabolism]
Q#1801	EGY33043	multi-dom	225176	1	58	2.45404e-07	50.4488	COG2267	PldB	N	-	Lysophospholipase, alpha-beta hydrolase superfamily	[Lipid transport and metabolism]
Q#692	EGY32455	specific	225181	41	544	4.56359e-122	370.993	COG2272	PnbA	-	cl21494	Carboxylesterase type B	[Lipid transport and metabolism]
Q#1302	EGY34732	specific	225410	4	205	1.56161e-69	213.395	COG2854	MlaC	-	cl01074	ABC-type transporter Mla maintaining outer membrane lipid asymmetry, periplasmic MlaC component	[Lipid transport and metabolism]
Q#1636	EGY34995	multi-dom	225488	1	807	0	1219.57	COG2937	PlsB	-	-	Glycerol-3-phosphate O-acyltransferase	[Lipid transport and metabolism]
Q#1804	EGY33046	non-specific	226472	1	107	0.00452909	35.4631	COG3963	COG3963	N	cl17173	Phospholipid N-methyltransferase	[Lipid transport and metabolism]
Q#1008	EGY35272	specific	226955	1	309	7.14443e-135	387.922	COG4589	YnbB	-	cl21502	CDP-diglyceride synthetase	[Lipid transport and metabolism]
Q#630	EGY32393	multi-dom	227013	1	50	2.59359e-07	45.4278	COG4667	YjjU	C	-	Predicted phospholipase, patatin/cPLA2 family	[Lipid transport and metabolism]
Q#535	EGY33924	non-specific	227050	6	145	5.62969e-34	118.049	COG4706	COG4706	-	cl00509	Predicted 3-hydroxylacyl-ACP dehydratase, HotDog domain	[Lipid transport and metabolism]
Q#218	EGY34315	multi-dom	227136	68	277	6.03013e-18	82.6464	COG4799	MmdA	N	-	Acetyl-CoA carboxylase, carboxyltransferase component	[Lipid transport and metabolism]
Q#319	EGY34416	multi-dom	227136	59	236	4.97973e-16	76.4832	COG4799	MmdA	C	-	Acetyl-CoA carboxylase, carboxyltransferase component	[Lipid transport and metabolism]
Q#1154	EGY35362	specific	225467	1	203	1.87704e-89	264.223	COG2915	HflD	-	cl01097	Regulator of phage lambda lysogenization HflD, binds to CII and stimulates its degradation	[Mobilome: prophages, transposons, Signal transduction mechanisms]
Q#686	EGY32449	multi-dom	225361	34	264	1.84433e-20	86.5476	COG2801	Tra5	-	-	Transposase InsO and inactivated derivatives	[Mobilome: prophages, transposons]
Q#1332	EGY32343	multi-dom	225361	23	264	1.98921e-20	86.5476	COG2801	Tra5	-	-	Transposase InsO and inactivated derivatives	[Mobilome: prophages, transposons]
Q#2076	EGY32815	multi-dom	225382	3	233	9.81956e-62	198.374	COG2826	Tra8	N	-	Transposase and inactivated derivatives, IS30 family	[Mobilome: prophages, transposons]
Q#1079	EGY34068	multi-dom	225484	7	137	4.62886e-26	98.2605	COG2932	COG2932	N	-	Phage repressor protein C, contains Cro/C1-type HTH and peptisase s24 domains	[Mobilome: prophages, transposons]
Q#1572	EGY33700	multi-dom	225511	1	102	1.34044e-05	39.5205	COG2963	InsE	-	-	Transposase and inactivated derivatives	[Mobilome: prophages, transposons]
Q#1837	EGY33079	multi-dom	225511	1	48	0.00322396	32.2017	COG2963	InsE	C	-	Transposase and inactivated derivatives	[Mobilome: prophages, transposons]
Q#1364	EGY33601	non-specific	226128	3	143	1.6977e-29	106.395	COG3600	GepA	-	cl01445	Uncharacterized phage-associated protein	[Mobilome: prophages, transposons]
Q#1360	EGY33597	multi-dom	226144	1	171	4.83231e-41	139.425	COG3617	COG3617	-	-	Prophage antirepressor	[Mobilome: prophages, transposons]
Q#117	EGY34214	non-specific	226162	1	89	2.30018e-25	92.0303	COG3636	COG3636	-	cl22854	DNA-binding prophage protein	[Mobilome: prophages, transposons]
Q#1085	EGY34074	non-specific	226162	2	94	2.13991e-28	100.119	COG3636	COG3636	-	cl22854	DNA-binding prophage protein	[Mobilome: prophages, transposons]
Q#2085	EGY32824	specific	226162	1	97	1.27973e-45	144.032	COG3636	COG3636	-	cl22854	DNA-binding prophage protein	[Mobilome: prophages, transposons]
Q#451	EGY34548	non-specific	226180	244	297	1.41772e-07	48.9158	COG3654	Doc	NC	cl00960	Prophage maintenance system killer protein	[Mobilome: prophages, transposons]
Q#1716	EGY35199	specific	226194	3	70	4.72355e-09	48.2038	COG3668	ParE	N	cl21503	Plasmid stabilization system protein ParE	[Mobilome: prophages, transposons]
Q#1827	EGY33069	specific	226194	1	92	1.89484e-10	52.8262	COG3668	ParE	-	cl21503	Plasmid stabilization system protein ParE	[Mobilome: prophages, transposons]
Q#1426	EGY33767	non-specific	226462	594	695	0.00686306	37.5303	COG3953	SLT	C	cl00222	SLT domain protein	[Mobilome: prophages, transposons]
Q#190	EGY34287	non-specific	227000	395	514	0.000101251	44.0515	COG4653	COG4653	C	cl21556	Predicted phage phi-C31 gp36 major capsid-like protein	[Mobilome: prophages, transposons]
Q#1911	EGY33153	non-specific	227024	6	112	3.17898e-34	116.344	COG4679	COG4679	-	cl21503	Phage-related protein	[Mobilome: prophages, transposons]
Q#1220	EGY33512	multi-dom	223538	1	315	6.10105e-173	485.168	COG0462	PrsA	-	-	Phosphoribosylpyrophosphate synthetase	[Nucleotide transport and metabolism, Amino acid transport and metabolism]
Q#1896	EGY33138	multi-dom	223538	79	117	3.66506e-07	47.5817	COG0462	PrsA	NC	-	Phosphoribosylpyrophosphate synthetase	[Nucleotide transport and metabolism, Amino acid transport and metabolism]
Q#906	EGY32310	non-specific	223611	209	263	0.000167925	39.6638	COG0537	Hit	C	cl00228	Diadenosine tetraphosphate (Ap4A) hydrolase or other HIT family hydrolase	[Nucleotide transport and metabolism, Carbohydrate transport and metabolism, General function prediction only]
Q#2002	EGY33244	specific	223611	4	113	1.27994e-37	125.563	COG0537	Hit	C	cl00228	Diadenosine tetraphosphate (Ap4A) hydrolase or other HIT family hydrolase	[Nucleotide transport and metabolism, Carbohydrate transport and metabolism, General function prediction only]
Q#1062	EGY34051	multi-dom	223808	7	574	2.56748e-174	510.082	COG0737	UshA	-	-	2',3'-cyclic-nucleotide 2'-phosphodiesterase/5'- or 3'-nucleotidase, 5'-nucleotidase family	[Nucleotide transport and metabolism, Defense mechanisms]
Q#1571	EGY33699	multi-dom	223808	19	598	2.7222e-95	304	COG0737	UshA	-	-	2',3'-cyclic-nucleotide 2'-phosphodiesterase/5'- or 3'-nucleotidase, 5'-nucleotidase family	[Nucleotide transport and metabolism, Defense mechanisms]
Q#1192	EGY35400	specific	223827	1	151	1.75461e-76	226.72	COG0756	Dut	-	cl00493	dUTPase	[Nucleotide transport and metabolism, Defense mechanisms]
Q#673	EGY32436	multi-dom	223479	22	329	3.66728e-49	171.09	COG0402	SsnA	-	-	Cytosine/adenosine deaminase or related metal-dependent hydrolase	[Nucleotide transport and metabolism, General function prediction only]
Q#1036	EGY34025	specific	224808	7	197	2.30396e-51	166.017	COG1896	YfbR	-	cl21469	5'-deoxynucleotidase YfbR and related HD superfamily hydrolases	[Nucleotide transport and metabolism, General function prediction only]
Q#706	EGY32469	multi-dom	223326	19	504	1.97878e-177	511.468	COG0248	GppA	-	-	Exopolyphosphatase/pppGpp-phosphohydrolase	[Nucleotide transport and metabolism, Signal transduction mechanisms, Inorganic ion transport and metabolism]
Q#625	EGY32388	non-specific	225232	252	352	8.09779e-13	67.3735	COG2357	YjbM	NC	cl11966	ppGpp synthetase catalytic domain (RelA/SpoT-type nucleotidyltranferase)	[Nucleotide transport and metabolism, Signal transduction mechanisms]
Q#1327	EGY34757	non-specific	225232	173	404	1.47166e-08	54.6619	COG2357	YjbM	-	cl11966	ppGpp synthetase catalytic domain (RelA/SpoT-type nucleotidyltranferase)	[Nucleotide transport and metabolism, Signal transduction mechanisms]
Q#1153	EGY35361	multi-dom	223094	12	455	1.60135e-161	466.709	COG0015	PurB	-	-	Adenylosuccinate lyase	[Nucleotide transport and metabolism]
Q#1919	EGY33161	specific	223113	1	208	3.20781e-110	317.201	COG0035	Upp	-	cl00309	Uracil phosphoribosyltransferase	[Nucleotide transport and metabolism]
Q#917	EGY32321	specific	223139	17	300	1.55316e-104	309.246	COG0061	NadF	-	cl01255	NAD kinase	[Nucleotide transport and metabolism]
Q#1704	EGY35187	specific	223182	2	431	0	736.357	COG0104	PurA	-	cl21455	Adenylosuccinate synthase	[Nucleotide transport and metabolism]
Q#1676	EGY35159	specific	223183	3	133	4.72038e-79	232.447	COG0105	Ndk	-	cl00335	Nucleoside diphosphate kinase	[Nucleotide transport and metabolism]
Q#1788	EGY33030	multi-dom	223203	1	205	6.14948e-83	247.973	COG0125	Tmk	-	-	Thymidylate kinase	[Nucleotide transport and metabolism]
Q#928	EGY33946	specific	223205	31	224	1.11248e-87	260.236	COG0127	RdgB	-	cl00276	Inosine/xanthosine triphosphate pyrophosphatase, all-alpha NTP-PPase family	[Nucleotide transport and metabolism]
Q#513	EGY33902	multi-dom	223228	3	341	0	538.331	COG0150	PurM	-	-	Phosphoribosylaminoimidazole (AIR) synthetase	[Nucleotide transport and metabolism]
Q#362	EGY34459	specific	223245	50	339	2.45901e-120	352.276	COG0167	PyrD	-	cl21457	Dihydroorotate dehydrogenase	[Nucleotide transport and metabolism]
Q#1218	EGY33510	non-specific	223245	237	334	6.64452e-08	52.2056	COG0167	PyrD	N	cl21457	Dihydroorotate dehydrogenase	[Nucleotide transport and metabolism]
Q#161	EGY34258	non-specific	223272	1	30	0.00199836	36.7404	COG0194	Gmk	C	cl17190	Guanylate kinase	[Nucleotide transport and metabolism]
Q#1305	EGY34735	non-specific	223272	28	51	0.00237524	36.7404	COG0194	Gmk	C	cl17190	Guanylate kinase	[Nucleotide transport and metabolism]
Q#1325	EGY34755	specific	223272	1	193	3.14045e-109	314.084	COG0194	Gmk	-	cl17190	Guanylate kinase	[Nucleotide transport and metabolism]
Q#1478	EGY33819	non-specific	223272	20	41	0.00246415	36.3552	COG0194	Gmk	C	cl17190	Guanylate kinase	[Nucleotide transport and metabolism]
Q#1859	EGY33101	specific	223285	1	283	1.97746e-125	361.227	COG0207	ThyA	-	cl19097	Thymidylate synthase	[Nucleotide transport and metabolism]
Q#429	EGY34526	non-specific	223286	11	328	1.86001e-27	109.313	COG0208	NrdF	-	cl00264	Ribonucleotide reductase beta subunit, ferritin-like domain	[Nucleotide transport and metabolism]
Q#586	EGY34889	specific	223286	2	372	2.47393e-130	380.494	COG0208	NrdF	-	cl00264	Ribonucleotide reductase beta subunit, ferritin-like domain	[Nucleotide transport and metabolism]
Q#428	EGY34525	multi-dom	223287	28	560	3.39476e-78	261.146	COG0209	NrdA	-	-	Ribonucleotide reductase alpha subunit	[Nucleotide transport and metabolism]
Q#588	EGY34891	multi-dom	223287	36	750	0	709.904	COG0209	NrdA	-	-	Ribonucleotide reductase alpha subunit	[Nucleotide transport and metabolism]
Q#116	EGY34213	multi-dom	223310	4	450	4.32869e-168	482.203	COG0232	Dgt	-	-	dGTP triphosphohydrolase	[Nucleotide transport and metabolism]
Q#2150	EGY35084	specific	223351	1	212	4.70468e-108	313.795	COG0274	DeoC	-	cl21457	Deoxyribose-phosphate aldolase	[Nucleotide transport and metabolism]
Q#161	EGY34258	multi-dom	223360	1	223	2.71544e-110	318.748	COG0283	Cmk	-	-	Cytidylate kinase	[Nucleotide transport and metabolism]
Q#166	EGY34263	specific	223361	1	230	2.09371e-101	296.885	COG0284	PyrF	-	cl21457	Orotidine-5'-phosphate decarboxylase	[Nucleotide transport and metabolism]
Q#1236	EGY33528	multi-dom	223372	53	177	1.91775e-46	154.748	COG0295	Cdd	-	-	Cytidine deaminase	[Nucleotide transport and metabolism]
Q#487	EGY34584	non-specific	223376	94	288	6.09917e-42	144.647	COG0299	PurN	-	cl00395	Folate-dependent phosphoribosylglycinamide formyltransferase PurN	[Nucleotide transport and metabolism]
Q#514	EGY33903	non-specific	223376	2	50	1.32082e-17	72.2291	COG0299	PurN	C	cl00395	Folate-dependent phosphoribosylglycinamide formyltransferase PurN	[Nucleotide transport and metabolism]
Q#854	EGY34610	non-specific	223376	2	81	3.32998e-08	50.2727	COG0299	PurN	N	cl00395	Folate-dependent phosphoribosylglycinamide formyltransferase PurN	[Nucleotide transport and metabolism]
Q#505	EGY33894	non-specific	223537	192	220	0.0070162	35.3083	COG0461	PyrE	NC	cl00309	Orotate phosphoribosyltransferase	[Nucleotide transport and metabolism]
Q#635	EGY32398	specific	223537	4	211	3.72653e-73	222.901	COG0461	PyrE	-	cl00309	Orotate phosphoribosyltransferase	[Nucleotide transport and metabolism]
Q#19	EGY33478	specific	223577	1	144	1.64261e-33	117.755	COG0503	Apt	-	cl00309	Adenine/guanine phosphoribosyltransferase or related PRPP-binding protein	[Nucleotide transport and metabolism]
Q#181	EGY34278	specific	223577	24	202	2.5825e-69	211.744	COG0503	Apt	-	cl00309	Adenine/guanine phosphoribosyltransferase or related PRPP-binding protein	[Nucleotide transport and metabolism]
Q#1273	EGY32745	multi-dom	223578	3	542	0	987.786	COG0504	PyrG	-	-	CTP synthase (UTP-ammonia lyase)	[Nucleotide transport and metabolism]
Q#1736	EGY35219	multi-dom	223590	258	477	1.77552e-50	171.274	COG0516	GuaB	-	-	IMP dehydrogenase/GMP reductase	[Nucleotide transport and metabolism]
Q#1736	EGY35219	multi-dom	223590	1	98	1.56423e-31	118.887	COG0516	GuaB	C	-	IMP dehydrogenase/GMP reductase	[Nucleotide transport and metabolism]
Q#220	EGY34317	multi-dom	223592	7	199	9.24115e-82	255.261	COG0518	GuaA1	-	-	GMP synthase - Glutamine amidotransferase domain	[Nucleotide transport and metabolism]
Q#498	EGY33887	multi-dom	223592	73	197	1.01644e-13	65.3573	COG0518	GuaA1	N	-	GMP synthase - Glutamine amidotransferase domain	[Nucleotide transport and metabolism]
Q#220	EGY34317	multi-dom	223593	202	519	0	624.21	COG0519	GuaA2	-	-	GMP synthase, PP-ATPase domain/subunit	[Nucleotide transport and metabolism]
Q#990	EGY35254	specific	223602	2	237	3.24326e-118	339.965	COG0528	PyrH	-	cl00452	Uridylate kinase	[Nucleotide transport and metabolism]
Q#1281	EGY34711	non-specific	223602	228	259	2.7442e-07	51.0652	COG0528	PyrH	N	cl00452	Uridylate kinase	[Nucleotide transport and metabolism]
Q#210	EGY34307	multi-dom	223637	1	214	3.08967e-68	209.439	COG0563	Adk	-	-	Adenylate kinase or related kinase	[Nucleotide transport and metabolism]
Q#28	EGY33487	multi-dom	223645	88	317	1.64759e-14	70.0034	COG0572	Udk	-	-	Uridine kinase	[Nucleotide transport and metabolism]
Q#1696	EGY35179	multi-dom	223645	82	269	1.99691e-92	274.93	COG0572	Udk	-	-	Uridine kinase	[Nucleotide transport and metabolism]
Q#1220	EGY33512	non-specific	223707	152	245	1.20584e-06	46.7464	COG0634	HptA	C	cl00309	Hypoxanthine-guanine phosphoribosyltransferase	[Nucleotide transport and metabolism]
Q#1896	EGY33138	specific	223707	1	179	7.91975e-92	268.236	COG0634	HptA	-	cl00309	Hypoxanthine-guanine phosphoribosyltransferase	[Nucleotide transport and metabolism]
Q#1697	EGY35180	specific	223789	1	192	3.07642e-71	216.379	COG0717	Dcd	-	cl00493	Deoxycytidine triphosphate deaminase	[Nucleotide transport and metabolism]
Q#1015	EGY34004	specific	223846	1	229	1.73572e-84	253.419	COG0775	Pfs	-	cl00303	Nucleoside phosphorylase	[Nucleotide transport and metabolism]
Q#487	EGY34584	multi-dom	223859	13	289	5.13142e-154	434.722	COG0788	PurU	-	-	Formyltetrahydrofolate hydrolase	[Nucleotide transport and metabolism]
Q#1598	EGY33726	specific	223883	1	234	4.40983e-148	415.878	COG0813	DeoD	-	cl00303	Purine-nucleoside phosphorylase	[Nucleotide transport and metabolism]
Q#703	EGY32466	specific	223979	120	238	4.96207e-11	58.1734	COG1051	YjhB	-	cl00447	ADP-ribose pyrophosphatase YjhB, NUDIX family	[Nucleotide transport and metabolism]
Q#1167	EGY35375	specific	223979	1	133	4.29391e-16	70.1146	COG1051	YjhB	-	cl00447	ADP-ribose pyrophosphatase YjhB, NUDIX family	[Nucleotide transport and metabolism]
Q#1831	EGY33073	multi-dom	224247	3	708	0	989.545	COG1328	NrdD	-	-	Anaerobic ribonucleoside-triphosphate reductase	[Nucleotide transport and metabolism]
Q#959	EGY33977	specific	224352	1	192	2.12709e-106	306.464	COG1435	Tdk	-	cl21455	Thymidine kinase	[Nucleotide transport and metabolism]
Q#1700	EGY35183	non-specific	224533	222	344	0.000109937	41.9201	COG1618	THEP1	C	cl21455	Nucleoside-triphosphatase THEP1	[Nucleotide transport and metabolism]
Q#1599	EGY33727	multi-dom	224883	1	410	0	519.483	COG1972	NupC	-	-	Nucleoside permease NupC	[Nucleotide transport and metabolism]
Q#1156	EGY35364	specific	224976	1	178	2.61951e-86	254.126	COG2065	PyrR	-	cl00309	Pyrimidine operon attenuation protein/uracil phosphoribosyltransferase	[Nucleotide transport and metabolism]
Q#1920	EGY33162	multi-dom	225142	13	411	2.01645e-112	339.976	COG2233	UraA	-	-	Xanthine/uracil permease	[Nucleotide transport and metabolism]
Q#215	EGY34312	multi-dom	225161	8	359	3.18532e-112	337.279	COG2252	AzgA	-	-	Xanthine/uracil/vitamin C permease, AzgA family	[Nucleotide transport and metabolism]
Q#703	EGY32466	multi-dom	225373	1	260	1.08072e-108	318.121	COG2816	NPY1	-	-	NADH pyrophosphatase NudC, Nudix superfamily	[Nucleotide transport and metabolism]
Q#1110	EGY35318	multi-dom	225373	35	101	3.4265e-05	41.5477	COG2816	NPY1	NC	-	NADH pyrophosphatase NudC, Nudix superfamily	[Nucleotide transport and metabolism]
Q#1452	EGY33793	multi-dom	225373	63	123	0.000242964	39.6217	COG2816	NPY1	NC	-	NADH pyrophosphatase NudC, Nudix superfamily	[Nucleotide transport and metabolism]
Q#1856	EGY33098	multi-dom	225373	13	74	0.000209287	39.6217	COG2816	NPY1	NC	-	NADH pyrophosphatase NudC, Nudix superfamily	[Nucleotide transport and metabolism]
Q#868	EGY34624	specific	225376	1	251	1.04533e-118	342.014	COG2820	Udp	-	cl00303	Uridine phosphorylase	[Nucleotide transport and metabolism]
Q#710	EGY32473	multi-dom	225614	1	833	0	1156.45	COG3072	CyaA	-	-	Adenylate cyclase	[Nucleotide transport and metabolism]
Q#1537	EGY32655	non-specific	226140	288	415	1.52848e-23	95.9441	COG3613	RCL	-	cl22890	Nucleoside 2-deoxyribosyltransferase	[Nucleotide transport and metabolism]
Q#1991	EGY33233	non-specific	227294	278	317	0.00374985	36.3049	COG4959	TraF	N	cl10465	Type IV secretory pathway, protease TraF	[Posttranslational modification, protein turnover, chaperones, Intracellular trafficking, secretion, and vesicular transport]
Q#2059	EGY32804	multi-dom	225400	1	863	0	1080.08	COG2844	GlnD	-	-	UTP:GlnB (protein PII) uridylyltransferase	[Posttranslational modification, protein turnover, chaperones, Signal transduction mechanisms]
Q#1486	EGY33827	non-specific	227295	23	141	7.02777e-13	61.6068	COG4960	CpaA	-	cl21703	Flp pilus assembly protein, protease CpaA	[Posttranslational modification, protein turnover, chaperones, Signal transduction mechanisms]
Q#199	EGY34296	multi-dom	223821	299	424	0.000627426	40.5683	COG0750	RseP	NC	-	Membrane-associated protease RseP, regulator of RpoE activity	[Posttranslational modification, protein turnover, chaperones, Transcription]
Q#996	EGY35260	multi-dom	223821	3	443	8.67388e-85	267.066	COG0750	RseP	-	-	Membrane-associated protease RseP, regulator of RpoE activity	[Posttranslational modification, protein turnover, chaperones, Transcription]
Q#42	EGY34139	multi-dom	223146	5	753	0	876.327	COG0068	HypF	-	-	Hydrogenase maturation factor HypF (carbamoyltransferase)	[Posttranslational modification, protein turnover, chaperones]
Q#132	EGY34229	multi-dom	223146	8	90	2.14926e-12	61.6295	COG0068	HypF	C	-	Hydrogenase maturation factor HypF (carbamoyltransferase)	[Posttranslational modification, protein turnover, chaperones]
Q#977	EGY35241	multi-dom	223146	3	141	0.00601874	35.436	COG0068	HypF	NC	-	Hydrogenase maturation factor HypF (carbamoyltransferase)	[Posttranslational modification, protein turnover, chaperones]
Q#289	EGY34386	specific	223303	40	209	8.22874e-83	251.76	COG0225	MsrA	-	cl00366	Peptide methionine sulfoxide reductase MsrA	[Posttranslational modification, protein turnover, chaperones]
Q#289	EGY34386	specific	223307	211	345	2.84015e-88	264.486	COG0229	MsrB	-	cl15841	Peptide methionine sulfoxide reductase MsrB	[Posttranslational modification, protein turnover, chaperones]
Q#617	EGY32380	specific	223312	1	96	2.59282e-39	127.682	COG0234	GroES	-	cl09113	Co-chaperonin GroES (HSP10)	[Posttranslational modification, protein turnover, chaperones]
Q#199	EGY34296	multi-dom	223343	6	368	5.12754e-114	341.875	COG0265	DegQ	-	-	Periplasmic serine protease, S1-C subfamily, contain C-terminal PDZ domain	[Posttranslational modification, protein turnover, chaperones]
Q#1037	EGY34026	multi-dom	223343	5	337	2.27445e-88	271.769	COG0265	DegQ	-	-	Periplasmic serine protease, S1-C subfamily, contain C-terminal PDZ domain	[Posttranslational modification, protein turnover, chaperones]
Q#792	EGY32761	specific	223355	1	103	1.5856e-63	190.574	COG0278	GrxD	-	cl00388	Glutaredoxin-related protein	[Posttranslational modification, protein turnover, chaperones]
Q#416	EGY34513	specific	223375	1	81	1.85187e-29	102.067	COG0298	HypC	-	cl00394	Hydrogenase maturation factor	[Posttranslational modification, protein turnover, chaperones]
Q#1023	EGY34012	multi-dom	223386	5	337	2.41066e-129	376.225	COG0309	HypE	-	-	Hydrogenase maturation factor	[Posttranslational modification, protein turnover, chaperones]
Q#504	EGY33893	specific	223393	1	99	9.22902e-37	125.375	COG0316	IscA	-	cl00400	Fe-S cluster assembly iron-binding protein IscA	[Posttranslational modification, protein turnover, chaperones]
Q#1685	EGY35168	specific	223393	1	107	2.30336e-53	164.666	COG0316	IscA	-	cl00400	Fe-S cluster assembly iron-binding protein IscA	[Posttranslational modification, protein turnover, chaperones]
Q#2057	EGY32802	specific	223393	7	113	1.01146e-54	168.518	COG0316	IscA	-	cl00400	Fe-S cluster assembly iron-binding protein IscA	[Posttranslational modification, protein turnover, chaperones]
Q#1456	EGY33797	multi-dom	223403	2	625	0	983.299	COG0326	HtpG	-	-	Molecular chaperone, HSP90 family	[Posttranslational modification, protein turnover, chaperones]
Q#105	EGY34202	multi-dom	223407	7	299	9.51802e-78	241.193	COG0330	HflC	-	-	Regulator of protease activity HflC, stomatin/prohibitin superfamily	[Posttranslational modification, protein turnover, chaperones]
Q#1275	EGY34705	multi-dom	223407	1	295	7.12946e-60	194.584	COG0330	HflC	-	-	Regulator of protease activity HflC, stomatin/prohibitin superfamily	[Posttranslational modification, protein turnover, chaperones]
Q#1276	EGY34706	multi-dom	223407	82	366	2.14903e-69	223.474	COG0330	HflC	-	-	Regulator of protease activity HflC, stomatin/prohibitin superfamily	[Posttranslational modification, protein turnover, chaperones]
Q#560	EGY34863	multi-dom	223416	1	679	0	1078.83	COG0339	Dcp	-	-	Zn-dependent oligopeptidase	[Posttranslational modification, protein turnover, chaperones]
Q#631	EGY32394	multi-dom	223431	3	294	1.63248e-90	273.855	COG0354	YgfZ	-	-	Folate-binding Fe-S cluster repair protein YgfZ, possible role in tRNA modification	[Posttranslational modification, protein turnover, chaperones]
Q#212	EGY34309	specific	223452	1	113	1.44118e-43	140.111	COG0375	HybF	-	cl19201	Hydrogenase maturation metallochaperone HypA/HybF, involved in Ni insertion	[Posttranslational modification, protein turnover, chaperones]
Q#1021	EGY34010	specific	223455	70	267	2.28154e-74	228.253	COG0378	HypB	-	cl21455	Ni2+-binding GTPase involved in regulation of expression and maturation of urease and hydrogenase	[Posttranslational modification, protein turnover, chaperones]
Q#1022	EGY34011	specific	223486	1	370	0	535.378	COG0409	HypD	-	cl12072	Hydrogenase maturation factor	[Posttranslational modification, protein turnover, chaperones]
Q#6	EGY33300	specific	223502	3	79	1.85852e-26	93.9028	COG0425	TusA	-	cl00436	TusA-related sulfurtransferase	[Posttranslational modification, protein turnover, chaperones]
Q#1683	EGY35166	multi-dom	223520	18	602	0	622.826	COG0443	DnaK	-	-	Molecular chaperone DnaK (HSP70)	[Posttranslational modification, protein turnover, chaperones]
Q#1719	EGY35202	multi-dom	223520	1	605	0	791.544	COG0443	DnaK	-	-	Molecular chaperone DnaK (HSP70)	[Posttranslational modification, protein turnover, chaperones]
Q#616	EGY32379	specific	223535	1	529	0	568.776	COG0459	GroEL	-	cl02777	Chaperonin GroEL (HSP60 family)	[Posttranslational modification, protein turnover, chaperones]
Q#485	EGY34582	multi-dom	223541	9	602	0	864.707	COG0465	HflB	-	-	ATP-dependent Zn proteases	[Posttranslational modification, protein turnover, chaperones]
Q#952	EGY33970	multi-dom	223542	4	781	0	1352.22	COG0466	Lon	-	-	ATP-dependent Lon protease, bacterial type	[Posttranslational modification, protein turnover, chaperones]
Q#1701	EGY35184	multi-dom	223560	1	163	9.98701e-37	130.823	COG0484	DnaJ	C	-	DnaJ-class molecular chaperone with C-terminal Zn finger domain	[Posttranslational modification, protein turnover, chaperones]
Q#1702	EGY35185	multi-dom	223560	7	151	2.71854e-33	121.578	COG0484	DnaJ	N	-	DnaJ-class molecular chaperone with C-terminal Zn finger domain	[Posttranslational modification, protein turnover, chaperones]
Q#1718	EGY35201	multi-dom	223560	1	372	2.63541e-177	501	COG0484	DnaJ	-	-	DnaJ-class molecular chaperone with C-terminal Zn finger domain	[Posttranslational modification, protein turnover, chaperones]
Q#90	EGY34187	multi-dom	223566	5	317	9.83198e-135	387.803	COG0492	TrxB	-	-	Thioredoxin reductase	[Posttranslational modification, protein turnover, chaperones]
Q#396	EGY34493	specific	223575	1	290	4.01023e-60	195.531	COG0501	HtpX	-	cl12018	Zn-dependent protease with chaperone function	[Posttranslational modification, protein turnover, chaperones]
Q#1507	EGY32625	specific	223575	41	246	7.34493e-32	119.647	COG0501	HtpX	N	cl12018	Zn-dependent protease with chaperone function	[Posttranslational modification, protein turnover, chaperones]
Q#287	EGY34384	specific	223600	26	143	3.63806e-10	53.7492	COG0526	TrxA	-	cl00388	Thiol-disulfide isomerase or thioredoxin	[Posttranslational modification, protein turnover, chaperones]
Q#823	EGY32700	specific	223600	1	71	1.78732e-09	49.512	COG0526	TrxA	N	cl00388	Thiol-disulfide isomerase or thioredoxin	[Posttranslational modification, protein turnover, chaperones]
Q#1962	EGY33204	specific	223600	33	157	4.76234e-14	64.92	COG0526	TrxA	-	cl00388	Thiol-disulfide isomerase or thioredoxin	[Posttranslational modification, protein turnover, chaperones]
Q#1975	EGY33217	specific	223600	30	153	6.57334e-18	75.7056	COG0526	TrxA	-	cl00388	Thiol-disulfide isomerase or thioredoxin	[Posttranslational modification, protein turnover, chaperones]
Q#2047	EGY32792	specific	223600	28	144	2.09672e-16	71.4684	COG0526	TrxA	-	cl00388	Thiol-disulfide isomerase or thioredoxin	[Posttranslational modification, protein turnover, chaperones]
Q#511	EGY33900	multi-dom	223616	1	243	1.49003e-131	392.413	COG0542	ClpA	N	-	ATP-dependent Clp protease ATP-binding subunit ClpA	[Posttranslational modification, protein turnover, chaperones]
Q#1176	EGY35384	multi-dom	223616	65	209	2.08612e-11	61.1414	COG0542	ClpA	N	-	ATP-dependent Clp protease ATP-binding subunit ClpA	[Posttranslational modification, protein turnover, chaperones]
Q#2024	EGY33266	multi-dom	223618	1	432	2.89435e-157	454.817	COG0544	Tig	-	-	FKBP-type peptidyl-prolyl cis-trans isomerase (trigger factor)	[Posttranslational modification, protein turnover, chaperones]
Q#744	EGY33368	multi-dom	223619	37	237	3.96092e-68	211.12	COG0545	FkpA	-	-	FKBP-type peptidyl-prolyl cis-trans isomerase	[Posttranslational modification, protein turnover, chaperones]
Q#1798	EGY33040	multi-dom	223619	8	210	8.34181e-78	234.617	COG0545	FkpA	-	-	FKBP-type peptidyl-prolyl cis-trans isomerase	[Posttranslational modification, protein turnover, chaperones]
Q#916	EGY32320	specific	223649	4	192	9.764e-58	182.145	COG0576	GrpE	-	cl03075	Molecular chaperone GrpE (heat shock protein)	[Posttranslational modification, protein turnover, chaperones]
Q#1228	EGY33520	multi-dom	223679	389	474	0.00053748	41.0654	COG0606	YifB	C	-	Predicted ATPase with chaperone activity	[Posttranslational modification, protein turnover, chaperones]
Q#1522	EGY32640	multi-dom	223679	10	225	2.05294e-120	354.233	COG0606	YifB	N	-	Predicted ATPase with chaperone activity	[Posttranslational modification, protein turnover, chaperones]
Q#1539	EGY32657	multi-dom	223679	15	287	2.54164e-131	384.663	COG0606	YifB	C	-	Predicted ATPase with chaperone activity	[Posttranslational modification, protein turnover, chaperones]
Q#272	EGY34369	multi-dom	223689	271	583	9.73684e-84	267.742	COG0616	SppA	-	-	Periplasmic serine protease, ClpP class	[Posttranslational modification, protein turnover, chaperones]
Q#272	EGY34369	multi-dom	223689	96	322	2.26942e-07	51.6448	COG0616	SppA	N	-	Periplasmic serine protease, ClpP class	[Posttranslational modification, protein turnover, chaperones]
Q#299	EGY34396	multi-dom	223689	98	344	1.55342e-81	253.489	COG0616	SppA	-	-	Periplasmic serine protease, ClpP class	[Posttranslational modification, protein turnover, chaperones]
Q#1914	EGY33156	multi-dom	223689	39	115	9.22761e-06	43.5556	COG0616	SppA	NC	-	Periplasmic serine protease, ClpP class	[Posttranslational modification, protein turnover, chaperones]
Q#189	EGY34286	multi-dom	223698	1	200	2.43745e-38	133.011	COG0625	GstA	-	-	Glutathione S-transferase	[Posttranslational modification, protein turnover, chaperones]
Q#444	EGY34541	multi-dom	223698	11	198	6.27366e-48	158.434	COG0625	GstA	-	-	Glutathione S-transferase	[Posttranslational modification, protein turnover, chaperones]
Q#1512	EGY32630	multi-dom	223711	1	159	2.24701e-07	47.6776	COG0638	PRE1	-	-	20S proteasome, alpha and beta subunits	[Posttranslational modification, protein turnover, chaperones]
Q#1825	EGY33067	specific	223725	1	170	1.71455e-76	227.872	COG0652	PpiB	-	cl00197	Peptidyl-prolyl cis-trans isomerase (rotamase) - cyclophilin family	[Posttranslational modification, protein turnover, chaperones]
Q#746	EGY33370	specific	223750	1	162	2.22626e-99	289.641	COG0678	AHP1	-	cl00388	Peroxiredoxin	[Posttranslational modification, protein turnover, chaperones]
Q#837	EGY32714	specific	223763	7	159	4.29676e-78	231.301	COG0691	SmpB	-	cl00482	tmRNA-binding protein	[Posttranslational modification, protein turnover, chaperones]
Q#504	EGY33893	specific	223766	100	192	2.92582e-35	121.25	COG0694	NifU	-	cl00484	Fe-S cluster biogenesis protein NfuA, 4Fe-4S-binding domain	[Posttranslational modification, protein turnover, chaperones]
Q#444	EGY34541	non-specific	223767	12	66	0.000119016	38.449	COG0695	GrxC	C	cl00388	Glutaredoxin	[Posttranslational modification, protein turnover, chaperones]
Q#746	EGY33370	specific	223767	171	242	1.05959e-26	99.6957	COG0695	GrxC	-	cl00388	Glutaredoxin	[Posttranslational modification, protein turnover, chaperones]
Q#2117	EGY32856	specific	223767	1	85	8.98217e-20	76.5838	COG0695	GrxC	-	cl00388	Glutaredoxin	[Posttranslational modification, protein turnover, chaperones]
Q#985	EGY35249	specific	223777	111	282	9.09349e-29	110.632	COG0705	GlpG	-	cl21536	Membrane associated serine protease, rhomboid family	[Posttranslational modification, protein turnover, chaperones]
Q#272	EGY34369	non-specific	223811	344	420	0.000355195	40.6889	COG0740	ClpP	C	cl21466	ATP-dependent protease ClpP, protease subunit	[Posttranslational modification, protein turnover, chaperones]
Q#1914	EGY33156	specific	223811	1	188	3.4277e-120	341.145	COG0740	ClpP	-	cl21466	ATP-dependent protease ClpP, protease subunit	[Posttranslational modification, protein turnover, chaperones]
Q#1958	EGY33200	specific	223826	1	242	1.75127e-64	204.561	COG0755	CcmC	-	cl00504	ABC-type transport system involved in cytochrome c biogenesis, permease component	[Posttranslational modification, protein turnover, chaperones]
Q#1157	EGY35365	multi-dom	223831	1	307	2.99442e-25	102.467	COG0760	SurA	-	-	Parvulin-like peptidyl-prolyl isomerase	[Posttranslational modification, protein turnover, chaperones]
Q#1918	EGY33160	multi-dom	223831	9	310	1.14162e-14	73.9626	COG0760	SurA	-	-	Parvulin-like peptidyl-prolyl isomerase	[Posttranslational modification, protein turnover, chaperones]
Q#1918	EGY33160	multi-dom	223831	244	395	6.03305e-15	74.733	COG0760	SurA	N	-	Parvulin-like peptidyl-prolyl isomerase	[Posttranslational modification, protein turnover, chaperones]
Q#1245	EGY33537	multi-dom	223864	129	571	6.31887e-127	385.146	COG0793	CtpA	-	-	C-terminal processing protease CtpA/Prc, contains a PDZ domain	[Posttranslational modification, protein turnover, chaperones]
Q#1686	EGY35169	specific	223892	1	126	5.26991e-50	158.3	COG0822	IscU	-	cl00528	NifU homolog involved in Fe-S cluster formation	[Posttranslational modification, protein turnover, chaperones]
Q#1412	EGY33649	specific	223896	1	396	9.31846e-159	456.376	COG0826	PrtC	-	cl03113	Collagenase-like protease, PrtC family	[Posttranslational modification, protein turnover, chaperones]
Q#1709	EGY35192	specific	223915	6	228	7.50217e-76	232.162	COG0846	SIR2	-	cl00195	NAD-dependent protein deacetylase, SIR2 family	[Posttranslational modification, protein turnover, chaperones]
Q#106	EGY34203	multi-dom	223961	9	148	2.12375e-06	44.6522	COG1030	NfeD	N	-	Membrane-bound serine protease (ClpP class)	[Posttranslational modification, protein turnover, chaperones]
Q#860	EGY34616	multi-dom	223976	1	155	1.36321e-61	191.699	COG1047	SlpA	-	-	FKBP-type peptidyl-prolyl cis-trans isomerase 2	[Posttranslational modification, protein turnover, chaperones]
Q#1228	EGY33520	multi-dom	223993	1	456	0	755.597	COG1066	Sms	-	-	Predicted ATP-dependent serine protease	[Posttranslational modification, protein turnover, chaperones]
Q#469	EGY34566	multi-dom	223994	49	581	3.20118e-169	499.19	COG1067	LonB	-	-	Predicted ATP-dependent protease	[Posttranslational modification, protein turnover, chaperones]
Q#636	EGY32399	multi-dom	224002	56	270	5.20058e-42	143.638	COG1076	DjlA	-	-	DnaJ-domain-containing proteins 1	[Posttranslational modification, protein turnover, chaperones]
Q#1684	EGY35167	multi-dom	224002	3	173	1.48213e-32	115.903	COG1076	DjlA	-	-	DnaJ-domain-containing proteins 1	[Posttranslational modification, protein turnover, chaperones]
Q#1175	EGY35383	multi-dom	224101	18	130	5.78959e-17	75.4122	COG1180	PflA	C	-	Pyruvate-formate lyase-activating enzyme	[Posttranslational modification, protein turnover, chaperones]
Q#2006	EGY33248	multi-dom	224101	1	246	1.75335e-102	301.139	COG1180	PflA	-	-	Pyruvate-formate lyase-activating enzyme	[Posttranslational modification, protein turnover, chaperones]
Q#1913	EGY33155	multi-dom	224140	10	411	0	771.387	COG1219	ClpX	-	-	ATP-dependent protease Clp, ATPase subunit	[Posttranslational modification, protein turnover, chaperones]
Q#1513	EGY32631	multi-dom	224141	1	443	0	817.272	COG1220	HslU	-	-	ATP-dependent protease HslVU (ClpYQ), ATPase subunit	[Posttranslational modification, protein turnover, chaperones]
Q#1289	EGY34719	specific	224146	1	154	4.27661e-76	226.374	COG1225	Bcp	-	cl00388	Peroxiredoxin	[Posttranslational modification, protein turnover, chaperones]
Q#1113	EGY35321	specific	224200	6	285	1.29177e-129	372.755	COG1281	HslO	-	cl00236	Redox-regulated molecular chaperone, HSP33 family	[Posttranslational modification, protein turnover, chaperones]
Q#550	EGY34853	multi-dom	224206	20	407	0.000175175	43.1972	COG1287	Stt3	C	-	Asparagine N-glycosylation enzyme, membrane subunit Stt3	[Posttranslational modification, protein turnover, chaperones]
Q#1075	EGY34064	multi-dom	224309	10	976	0	1157.1	COG1391	GlnE	-	-	Glutamine synthetase adenylyltransferase	[Posttranslational modification, protein turnover, chaperones]
Q#1943	EGY33185	specific	224412	1	152	2.26845e-35	123.323	COG1495	DsbB	-	cl00649	Disulfide bond formation protein DsbB	[Posttranslational modification, protein turnover, chaperones]
Q#2064	EGY35122	non-specific	224412	12	129	3.6509e-10	57.8387	COG1495	DsbB	-	cl00649	Disulfide bond formation protein DsbB	[Posttranslational modification, protein turnover, chaperones]
Q#106	EGY34203	specific	224501	7	148	2.52254e-28	102.813	COG1585	YbbJ	-	cl00686	Membrane protein implicated in regulation of membrane protease activity	[Posttranslational modification, protein turnover, chaperones]
Q#1012	EGY34001	multi-dom	224565	1	227	5.1272e-42	144.236	COG1651	DsbG	-	-	Protein-disulfide isomerase	[Posttranslational modification, protein turnover, chaperones]
Q#1769	EGY33011	multi-dom	224565	37	177	7.50843e-07	46.7801	COG1651	DsbG	N	-	Protein-disulfide isomerase	[Posttranslational modification, protein turnover, chaperones]
Q#100	EGY34197	multi-dom	224771	122	460	3.84836e-136	399.483	COG1858	MauG	-	-	Cytochrome c peroxidase	[Posttranslational modification, protein turnover, chaperones]
Q#1923	EGY33165	specific	224931	1	150	1.71893e-24	94.0411	COG2020	STE14	-	cl21511	Protein-S-isoprenylcysteine O-methyltransferase Ste14	[Posttranslational modification, protein turnover, chaperones]
Q#785	EGY32754	specific	224988	1	158	3.03502e-84	247.61	COG2077	Tpx	-	cl00388	Peroxiredoxin	[Posttranslational modification, protein turnover, chaperones]
Q#2158	EGY35092	specific	225048	5	152	3.18474e-42	140.142	COG2137	RecX	-	cl00936	SOS response regulatory protein OraA/RecX, interacts with RecA	[Posttranslational modification, protein turnover, chaperones]
Q#827	EGY32704	non-specific	225054	528	609	1.0659e-05	44.8722	COG2143	SoxW	NC	cl00388	Thioredoxin-related protein	[Posttranslational modification, protein turnover, chaperones]
Q#111	EGY34208	specific	225077	2	126	3.16144e-45	145.875	COG2166	SufE	-	cl00951	Sulfur transfer protein SufE, Fe-S cluster assembly	[Posttranslational modification, protein turnover, chaperones]
Q#740	EGY33364	non-specific	225079	1	95	3.69443e-19	75.8705	COG2168	DsrH	-	cl00672	Sulfur transfer complex TusBCD TusB component, DsrH family	[Posttranslational modification, protein turnover, chaperones]
Q#1957	EGY33199	specific	225260	1	220	4.18857e-69	213.324	COG2386	CcmB	-	cl21474	ABC-type transport system involved in cytochrome c biogenesis, permease component	[Posttranslational modification, protein turnover, chaperones]
Q#1014	EGY34003	non-specific	225355	148	194	0.00160117	36.9799	COG2761	FrnE	N	cl00388	Predicted dithiol-disulfide isomerase, DsbA family	[Posttranslational modification, protein turnover, chaperones]
Q#1268	EGY33457	specific	225489	8	77	2.49425e-29	101.571	COG2938	SdhE	-	cl01110	Succinate dehydrogenase flavin-adding protein, antitoxin component of the CptAB toxin-antitoxin module	[Posttranslational modification, protein turnover, chaperones]
Q#443	EGY34540	specific	225517	1	153	1.01388e-80	237.737	COG2969	SspB	-	cl01120	Stringent starvation protein B, binds SsrA peptide	[Posttranslational modification, protein turnover, chaperones]
Q#1681	EGY35164	specific	225522	1	64	3.96901e-31	104.479	COG2975	IscX	-	cl01123	Fe-S-cluster formation regulator IscX/YfhJ	[Posttranslational modification, protein turnover, chaperones]
Q#1377	EGY33614	non-specific	225541	5	135	7.67434e-32	112.898	COG2994	HlyC	-	cl01131	ACP:hemolysin acyltransferase (hemolysin-activating protein)	[Posttranslational modification, protein turnover, chaperones]
Q#1708	EGY35191	multi-dom	225545	1	215	3.29963e-108	312.87	COG2999	GrxB	-	-	Glutaredoxin 2	[Posttranslational modification, protein turnover, chaperones]
Q#1559	EGY33687	non-specific	225604	1	86	9.22468e-28	97.8232	COG3062	NapD	-	cl01163	Cytoplasmic chaperone NapD for the signal peptide of periplasmic nitrate reductase NapAB	[Posttranslational modification, protein turnover, chaperones]
Q#91	EGY34188	multi-dom	225660	1	285	2.01969e-100	298.889	COG3118	YbbN	-	-	Negative regulator of GroEL, contains thioredoxin-like and TPR-like domains	[Posttranslational modification, protein turnover, chaperones]
Q#823	EGY32700	multi-dom	225660	4	69	1.54819e-18	75.8581	COG3118	YbbN	NC	-	Negative regulator of GroEL, contains thioredoxin-like and TPR-like domains	[Posttranslational modification, protein turnover, chaperones]
Q#1874	EGY33116	multi-dom	225660	53	194	0.000457131	40.805	COG3118	YbbN	N	-	Negative regulator of GroEL, contains thioredoxin-like and TPR-like domains	[Posttranslational modification, protein turnover, chaperones]
Q#1975	EGY33217	multi-dom	225660	63	147	0.00849392	34.6418	COG3118	YbbN	C	-	Negative regulator of GroEL, contains thioredoxin-like and TPR-like domains	[Posttranslational modification, protein turnover, chaperones]
Q#2047	EGY32792	multi-dom	225660	55	95	6.1939e-05	40.4198	COG3118	YbbN	C	-	Negative regulator of GroEL, contains thioredoxin-like and TPR-like domains	[Posttranslational modification, protein turnover, chaperones]
Q#108	EGY34205	specific	225916	1	183	1.06055e-47	156.383	COG3381	TorD	-	cl00958	Cytoplasmic chaperone TorD involved in molybdoenzyme TorA maturation	[Posttranslational modification, protein turnover, chaperones]
Q#1127	EGY35335	specific	225916	1	196	1.61054e-53	171.791	COG3381	TorD	-	cl00958	Cytoplasmic chaperone TorD involved in molybdoenzyme TorA maturation	[Posttranslational modification, protein turnover, chaperones]
Q#199	EGY34296	non-specific	226119	109	266	0.00288187	38.1352	COG3591	eMpr	N	cl21584	V8-like Glu-specific endopeptidase	[Posttranslational modification, protein turnover, chaperones]
Q#1956	EGY33198	multi-dom	226617	3	208	1.64467e-98	287.65	COG4133	CcmA	-	-	ABC-type transport system involved in cytochrome c biogenesis, ATPase component	[Posttranslational modification, protein turnover, chaperones]
Q#288	EGY34385	multi-dom	226685	12	209	3.90607e-13	66.626	COG4232	DsbD	NC	-	Thiol:disulfide interchange protein	[Posttranslational modification, protein turnover, chaperones]
Q#827	EGY32704	multi-dom	226685	1	612	0	587.416	COG4232	DsbD	-	-	Thiol:disulfide interchange protein	[Posttranslational modification, protein turnover, chaperones]
Q#1100	EGY35308	non-specific	226919	2	82	4.70628e-28	98.3387	COG4545	COG4545	-	cl00388	Glutaredoxin-related protein	[Posttranslational modification, protein turnover, chaperones]
Q#1124	EGY35332	non-specific	226919	2	86	3.8444e-31	106.428	COG4545	COG4545	-	cl00388	Glutaredoxin-related protein	[Posttranslational modification, protein turnover, chaperones]
Q#1512	EGY32630	specific	227692	1	175	4.43148e-111	316.918	COG5405	HslV	-	cl00467	ATP-dependent protease HslVU (ClpYQ), peptidase subunit	[Posttranslational modification, protein turnover, chaperones]
Q#1535	EGY32653	multi-dom	223987	121	239	2.89132e-18	79.757	COG1059	ENDO3c	N	-	Thermostable 8-oxoguanine DNA glycosylase	[Replication, recombination and repair, Defense mechanisms]
Q#950	EGY33968	multi-dom	223655	92	387	4.96977e-08	52.9704	COG0582	XerC	-	-	Integrase	[Replication, recombination and repair, Mobilome: prophages, transposons]
Q#1357	EGY33594	multi-dom	223655	46	329	1.37661e-10	60.2892	COG0582	XerC	-	-	Integrase	[Replication, recombination and repair, Mobilome: prophages, transposons]
Q#1844	EGY33086	multi-dom	223655	23	236	2.92864e-15	72.2304	COG0582	XerC	N	-	Integrase	[Replication, recombination and repair, Mobilome: prophages, transposons]
Q#1480	EGY33821	multi-dom	224118	14	1150	0	1674.72	COG1197	Mfd	-	-	Transcription-repair coupling factor (superfamily II helicase)	[Replication, recombination and repair, Transcription]
Q#1004	EGY35268	specific	223242	12	196	8.82102e-94	274.484	COG0164	RnhB	-	cl14782	Ribonuclease HII	[Replication, recombination and repair]
Q#1053	EGY34042	multi-dom	223255	1	209	3.97998e-121	344.936	COG0177	Nth	-	-	Endonuclease III	[Replication, recombination and repair]
Q#1173	EGY35381	multi-dom	223256	1	942	0	1766.34	COG0178	UvrA	-	-	Excinuclease UvrABC ATPase subunit	[Replication, recombination and repair]
Q#27	EGY33486	multi-dom	223265	4	806	0	1074.45	COG0187	GyrB	-	-	DNA gyrase/topoisomerase IV, subunit B	[Replication, recombination and repair]
Q#191	EGY34288	multi-dom	223265	1	630	0	923.452	COG0187	GyrB	-	-	DNA gyrase/topoisomerase IV, subunit B	[Replication, recombination and repair]
Q#169	EGY34266	multi-dom	223266	1	870	0	1193.24	COG0188	GyrA	-	-	DNA gyrase/topoisomerase IV, subunit A	[Replication, recombination and repair]
Q#190	EGY34287	multi-dom	223266	9	741	0	893.165	COG0188	GyrA	-	-	DNA gyrase/topoisomerase IV, subunit A	[Replication, recombination and repair]
Q#52	EGY34149	multi-dom	223288	8	656	0	709.271	COG0210	UvrD	-	-	Superfamily I DNA or RNA helicase	[Replication, recombination and repair]
Q#1577	EGY33705	multi-dom	223288	1	651	0	707.345	COG0210	UvrD	-	-	Superfamily I DNA or RNA helicase	[Replication, recombination and repair]
Q#1774	EGY33016	multi-dom	223327	6	862	0	1102.73	COG0249	MutS	-	-	DNA mismatch repair ATPase MutS	[Replication, recombination and repair]
Q#1574	EGY33702	multi-dom	223336	1	288	8.63255e-105	330.057	COG0258	Exo	-	-	5'-3' exonuclease	[Replication, recombination and repair]
Q#1198	EGY35406	multi-dom	223344	1	269	5.92239e-142	402.793	COG0266	Nei	-	-	Formamidopyrimidine-DNA glycosylase	[Replication, recombination and repair]
Q#2130	EGY32869	specific	223348	32	357	1.76856e-86	266.99	COG0270	Dcm	-	cl21501	Site-specific DNA-cytosine methylase	[Replication, recombination and repair]
Q#960	EGY33978	multi-dom	223350	2	670	0	1082.22	COG0272	Lig	-	-	NAD-dependent DNA ligase	[Replication, recombination and repair]
Q#574	EGY34877	multi-dom	223382	18	459	0	610.772	COG0305	DnaB	-	-	Replicative DNA helicase	[Replication, recombination and repair]
Q#249	EGY34346	multi-dom	223399	1	607	0	707.124	COG0322	UvrC	-	-	Excinuclease UvrABC, nuclease subunit	[Replication, recombination and repair]
Q#547	EGY34850	multi-dom	223400	2	596	0	635.534	COG0323	MutL	-	-	DNA mismatch repair ATPase MutL	[Replication, recombination and repair]
Q#1121	EGY35329	multi-dom	223400	24	62	0.000506741	40.7854	COG0323	MutL	C	-	DNA mismatch repair ATPase MutL	[Replication, recombination and repair]
Q#1405	EGY33642	specific	223405	3	152	1.1239e-70	212.217	COG0328	RnhA	-	cl14782	Ribonuclease HI	[Replication, recombination and repair]
Q#1178	EGY35386	specific	223415	12	281	2.68387e-100	297.698	COG0338	Dam	-	cl17173	Site-specific DNA-adenine methylase	[Replication, recombination and repair]
Q#1534	EGY32652	specific	223415	3	158	6.42113e-12	61.9563	COG0338	Dam	-	cl17173	Site-specific DNA-adenine methylase	[Replication, recombination and repair]
Q#1295	EGY34725	multi-dom	223427	3	158	3.62073e-52	166.483	COG0350	AdaB	-	-	O6-methylguanine-DNA--protein-cysteine methyltransferase	[Replication, recombination and repair]
Q#1434	EGY33775	multi-dom	223430	1	199	4.79226e-120	341.476	COG0353	RecR	-	-	Recombinational DNA repair protein RecR	[Replication, recombination and repair]
Q#954	EGY33972	multi-dom	223435	5	584	0	569.435	COG0358	DnaG	-	-	DNA primase (bacterial type)	[Replication, recombination and repair]
Q#1734	EGY35217	multi-dom	223466	1	339	2.24047e-123	361.628	COG0389	DinP	-	-	Nucleotidyltransferase/DNA polymerase involved in DNA repair	[Replication, recombination and repair]
Q#1436	EGY33777	multi-dom	223497	137	304	3.24847e-05	44.0507	COG0420	SbcD	C	-	DNA repair exonuclease SbcCD nuclease subunit	[Replication, recombination and repair]
Q#684	EGY32447	multi-dom	223510	19	496	1.1571e-51	184.428	COG0433	YjgR	-	-	Archaeal DNA helicase HerA or a related bacterial ATPase, contains HAS-barrel and ATPase domains	[Replication, recombination and repair]
Q#2157	EGY35091	multi-dom	223544	1	283	5.18896e-127	368.535	COG0468	RecA	-	-	RecA/RadA recombinase	[Replication, recombination and repair]
Q#1789	EGY33031	multi-dom	223546	132	320	2.43611e-14	70.0646	COG0470	HolB	-	-	DNA polymerase III, delta prime subunit	[Replication, recombination and repair]
Q#1624	EGY34983	specific	223570	1	244	4.18319e-125	358.477	COG0496	SurE	-	cl00448	Broad specificity polyphosphatase and 5'/3'-nucleotidase SurE	[Replication, recombination and repair]
Q#918	EGY32322	multi-dom	223571	1	555	0	668.536	COG0497	RecN	-	-	DNA repair ATPase RecN	[Replication, recombination and repair]
Q#465	EGY34562	multi-dom	223581	1	658	7.90075e-102	327.911	COG0507	RecD	-	-	ATP-dependent exoDNAse (exonuclease V), alpha subunit, helicase superfamily I	[Replication, recombination and repair]
Q#1814	EGY33056	multi-dom	223587	7	418	4.85021e-146	428.44	COG0513	SrmB	-	-	Superfamily II DNA and RNA helicase	[Replication, recombination and repair]
Q#1895	EGY33137	multi-dom	223587	2	510	1.14055e-168	493.153	COG0513	SrmB	-	-	Superfamily II DNA and RNA helicase	[Replication, recombination and repair]
Q#26	EGY33485	multi-dom	223588	29	623	0	865.455	COG0514	RecQ	-	-	Superfamily II DNA helicase RecQ	[Replication, recombination and repair]
Q#359	EGY34456	multi-dom	223624	3	600	0	756.754	COG0550	TopA	-	-	DNA topoisomerase IA	[Replication, recombination and repair]
Q#1433	EGY33774	multi-dom	223624	1	616	0	609.223	COG0550	TopA	-	-	DNA topoisomerase IA	[Replication, recombination and repair]
Q#359	EGY34456	multi-dom	223625	642	861	1.7532e-20	89.5384	COG0551	YrdD	-	-	ssDNA-binding Zn-finger and Zn-ribbon domains of topoisomerase 1	[Replication, recombination and repair]
Q#978	EGY35242	multi-dom	223625	59	190	8.73896e-29	105.717	COG0551	YrdD	-	-	ssDNA-binding Zn-finger and Zn-ribbon domains of topoisomerase 1	[Replication, recombination and repair]
Q#197	EGY34294	multi-dom	223630	8	675	0	1280.22	COG0556	UvrB	-	-	Excinuclease UvrABC helicase subunit UvrB	[Replication, recombination and repair]
Q#1836	EGY33078	multi-dom	223660	3	1135	0	1524.13	COG0587	DnaE	-	-	DNA polymerase III, alpha subunit	[Replication, recombination and repair]
Q#1981	EGY33223	multi-dom	223665	1	366	1.042e-139	404.741	COG0592	DnaN	-	-	DNA polymerase III sliding clamp (beta) subunit, PCNA homolog	[Replication, recombination and repair]
Q#1922	EGY33164	multi-dom	223666	5	232	1.07874e-64	208.293	COG0593	DnaA	C	-	Chromosomal replication initiation ATPase DnaA	[Replication, recombination and repair]
Q#1982	EGY33224	multi-dom	223666	9	449	0	518.764	COG0593	DnaA	-	-	Chromosomal replication initiation ATPase DnaA	[Replication, recombination and repair]
Q#1013	EGY34002	multi-dom	223681	31	548	6.0729e-155	456.138	COG0608	RecJ	-	-	Single-stranded DNA-specific exonuclease, DHH superfamily, may be involved in archaeal DNA replication intiation	[Replication, recombination and repair]
Q#1174	EGY35382	multi-dom	223702	2	159	1.1787e-55	174.586	COG0629	Ssb	-	-	Single-stranded DNA-binding protein	[Replication, recombination and repair]
Q#1602	EGY34770	multi-dom	223702	2	145	3.68703e-51	162.645	COG0629	Ssb	-	-	Single-stranded DNA-binding protein	[Replication, recombination and repair]
Q#1345	EGY33582	multi-dom	223705	1	204	3.83078e-84	250.237	COG0632	RuvA	-	-	Holliday junction resolvasome RuvABC DNA-binding subunit	[Replication, recombination and repair]
Q#1994	EGY33236	specific	223764	1	219	1.10482e-141	398.13	COG0692	Ung	-	cl00483	Uracil DNA glycosylase	[Replication, recombination and repair]
Q#76	EGY34173	specific	223780	1	267	3.67322e-119	344.582	COG0708	XthA	-	cl00490	Exonuclease III	[Replication, recombination and repair]
Q#1574	EGY33702	multi-dom	223820	337	933	0	896.623	COG0749	PolA	-	-	DNA polymerase I - 3'-5' exonuclease and polymerase domains	[Replication, recombination and repair]
Q#1643	EGY35002	multi-dom	223829	4	237	5.98403e-74	230.658	COG0758	Smf	N	-	Predicted Rossmann fold nucleotide-binding protein DprA/Smf involved in DNA uptake	[Replication, recombination and repair]
Q#163	EGY34260	specific	223847	1	93	1.24843e-37	123.392	COG0776	HimA	-	cl00257	Bacterial nucleoid DNA-binding protein	[Replication, recombination and repair]
Q#393	EGY34490	specific	223847	2	95	1.05836e-36	121.081	COG0776	HimA	-	cl00257	Bacterial nucleoid DNA-binding protein	[Replication, recombination and repair]
Q#700	EGY32463	specific	223847	1	90	6.40358e-38	123.778	COG0776	HimA	-	cl00257	Bacterial nucleoid DNA-binding protein	[Replication, recombination and repair]
Q#293	EGY34390	specific	223863	5	119	1.36385e-46	148.149	COG0792	YraN	-	cl00516	Predicted endonuclease distantly related to archaeal Holliday junction resolvase	[Replication, recombination and repair]
Q#1344	EGY33581	specific	223887	5	163	9.05679e-73	219.408	COG0817	RuvC	-	cl21482	Holliday junction resolvasome RuvABC endonuclease subunit	[Replication, recombination and repair]
Q#1406	EGY33643	multi-dom	223916	7	245	1.57594e-70	218.946	COG0847	DnaQ	-	-	DNA polymerase III, epsilon subunit or related 3'-5' exonuclease	[Replication, recombination and repair]
Q#145	EGY34242	specific	223931	245	365	1.35731e-08	55.3313	COG0863	YhdJ	N	cl17173	DNA modification methylase	[Replication, recombination and repair]
Q#1004	EGY35268	multi-dom	223969	15	156	6.08788e-08	50.0127	COG1039	RnhC	N	-	Ribonuclease HIII	[Replication, recombination and repair]
Q#466	EGY34563	multi-dom	224000	1	1194	0	804.374	COG1074	RecB	-	-	ATP-dependent exoDNAse (exonuclease V) beta subunit (contains helicase and exonuclease domains)	[Replication, recombination and repair]
Q#1588	EGY33716	multi-dom	224036	25	392	5.41016e-14	72.3732	COG1111	MPH1	-	-	ERCC4-related helicase	[Replication, recombination and repair]
Q#643	EGY32406	multi-dom	224115	18	387	6.03256e-170	481.844	COG1194	MutY	-	-	Adenine-specific DNA glycosylase, acts on AG and A-oxoG pairs	[Replication, recombination and repair]
Q#1980	EGY33222	multi-dom	224116	1	355	6.80309e-155	442.816	COG1195	RecF	-	-	Recombinational DNA repair ATPase RecF	[Replication, recombination and repair]
Q#1206	EGY35414	multi-dom	224119	1	731	0	918.261	COG1198	PriA	-	-	Primosomal protein N' (replication factor Y) - superfamily II helicase	[Replication, recombination and repair]
Q#94	EGY34191	multi-dom	224120	11	638	0	575.986	COG1199	DinG	-	-	Rad3-related DNA helicase	[Replication, recombination and repair]
Q#1328	EGY34758	multi-dom	224121	1	686	0	981.316	COG1200	RecG	-	-	RecG-like helicase	[Replication, recombination and repair]
Q#980	EGY35244	multi-dom	224241	69	537	2.13835e-117	357.087	COG1322	RmuC	-	-	DNA anti-recombination protein (rearrangement mutator) RmuC	[Replication, recombination and repair]
Q#1369	EGY33606	multi-dom	224249	1	1121	0	1049.28	COG1330	RecC	-	-	Exonuclease V gamma subunit	[Replication, recombination and repair]
Q#627	EGY32390	multi-dom	224299	2	223	2.28865e-67	210.282	COG1381	RecO	-	-	Recombinational DNA repair protein (RecF pathway)	[Replication, recombination and repair]
Q#1166	EGY35374	multi-dom	224383	4	343	2.98147e-74	234.951	COG1466	HolA	-	-	DNA polymerase III, delta subunit	[Replication, recombination and repair]
Q#113	EGY34210	multi-dom	224442	2	166	9.43054e-33	116.494	COG1525	YncB	-	-	Endonuclease YncB, thermonuclease family	[Replication, recombination and repair]
Q#509	EGY33898	multi-dom	224472	168	237	4.38218e-19	80.5677	COG1555	ComEA	N	-	DNA uptake protein ComE and related DNA-binding proteins	[Replication, recombination and repair]
Q#927	EGY33945	multi-dom	224472	37	109	6.61871e-23	87.5013	COG1555	ComEA	N	-	DNA uptake protein ComE and related DNA-binding proteins	[Replication, recombination and repair]
Q#1318	EGY34748	multi-dom	224486	1	438	0	572.661	COG1570	XseA	-	-	Exonuclease VII, large subunit	[Replication, recombination and repair]
Q#965	EGY33983	specific	224489	1	190	4.25207e-61	191.059	COG1573	Udg4	-	cl00483	Uracil-DNA glycosylase	[Replication, recombination and repair]
Q#318	EGY34415	specific	224636	4	81	3.95778e-14	61.9513	COG1722	XseB	-	cl00750	Exonuclease VII small subunit	[Replication, recombination and repair]
Q#53	EGY34150	multi-dom	224706	37	270	1.14235e-36	135.581	COG1793	CDC9	N	-	ATP-dependent DNA ligase	[Replication, recombination and repair]
Q#603	EGY34790	multi-dom	224872	1	180	2.7962e-41	140.711	COG1961	PinE	-	-	Site-specific DNA recombinase related to the DNA invertase Pin	[Replication, recombination and repair]
Q#1528	EGY32646	multi-dom	224872	7	243	2.47919e-21	92.1757	COG1961	PinE	-	-	Site-specific DNA recombinase related to the DNA invertase Pin	[Replication, recombination and repair]
Q#1195	EGY35403	multi-dom	224914	3	219	3.78182e-99	289.912	COG2003	RadC	-	-	DNA repair protein RadC, contains a helix-hairpin-helix DNA-binding motif	[Replication, recombination and repair]
Q#145	EGY34242	multi-dom	225100	37	402	1.14961e-51	187.338	COG2189	Mod	-	-	Adenine specific DNA methylase Mod	[Replication, recombination and repair]
Q#1346	EGY33583	multi-dom	225164	4	331	0	597.232	COG2255	RuvB	-	-	Holliday junction resolvasome RuvABC, ATP-dependent DNA helicase subunit	[Replication, recombination and repair]
Q#1232	EGY33524	multi-dom	225165	4	442	0	703.609	COG2256	RarA	-	-	Replication-associated recombination protein RarA (DNA-dependent ATPase)	[Replication, recombination and repair]
Q#182	EGY34279	multi-dom	225369	1	442	1.56546e-172	506.171	COG2812	DnaX	-	-	DNA polymerase III, gamma/tau subunits	[Replication, recombination and repair]
Q#1789	EGY33031	multi-dom	225369	11	163	3.93889e-27	110.185	COG2812	DnaX	C	-	DNA polymerase III, gamma/tau subunits	[Replication, recombination and repair]
Q#21	EGY33480	specific	225374	4	180	3.64177e-108	310.438	COG2818	Tag	-	cl01059	3-methyladenine DNA glycosylase Tag	[Replication, recombination and repair]
Q#127	EGY34224	multi-dom	225396	1	168	2.84499e-66	202.569	COG2840	SmrA	-	-	DNA-nicking endonuclease, Smr domain	[Replication, recombination and repair]
Q#352	EGY34449	multi-dom	225477	1	473	0	825.506	COG2925	SbcB	-	-	Exonuclease I	[Replication, recombination and repair]
Q#555	EGY34858	multi-dom	225477	7	55	9.57102e-05	40.4692	COG2925	SbcB	C	-	Exonuclease I	[Replication, recombination and repair]
Q#2123	EGY32862	specific	225479	2	149	5.55166e-51	161.35	COG2927	HolC	-	cl01106	DNA polymerase III, chi subunit	[Replication, recombination and repair]
Q#1639	EGY34998	non-specific	225513	7	108	1.02516e-43	139.902	COG2965	PriB	-	cl09930	Primosomal replication protein N	[Replication, recombination and repair]
Q#2019	EGY33261	non-specific	225521	1	55	8.61795e-22	84.3416	COG2974	RdgC	N	cl01122	DNA recombination-dependent growth factor C	[Replication, recombination and repair]
Q#2020	EGY33262	non-specific	225521	3	238	1.28492e-111	325.477	COG2974	RdgC	C	cl01122	DNA recombination-dependent growth factor C	[Replication, recombination and repair]
Q#1885	EGY33127	specific	225568	1	64	1.59261e-29	101.041	COG3024	YacG	-	cl01144	Endogenous inhibitor of DNA gyrase, YacG/DUF329 family	[Replication, recombination and repair]
Q#1371	EGY33608	non-specific	225592	12	144	1.9935e-34	118.729	COG3050	HolD	-	cl11436	DNA polymerase III, psi subunit	[Replication, recombination and repair]
Q#174	EGY34271	non-specific	225599	1	202	3.98595e-85	252.468	COG3057	SeqA	-	cl11470	Negative regulator of replication initiation	[Replication, recombination and repair]
Q#1294	EGY34724	non-specific	225608	1	217	4.98774e-140	394.218	COG3066	MutH	-	cl00277	DNA mismatch repair protein MutH	[Replication, recombination and repair]
Q#470	EGY34567	non-specific	225662	1	148	1.39249e-69	209.345	COG3120	MatP	-	cl23426	Macrodomain Ter protein organizer, MatP/YcbG family	[Replication, recombination and repair]
Q#2129	EGY32868	non-specific	226250	1	141	1.2126e-28	103.756	COG3727	Vsr	-	cl00277	G:T-mismatch repair DNA endonuclease, very short patch repair protein	[Replication, recombination and repair]
Q#1250	EGY33542	non-specific	226266	59	161	0.00198047	36.7167	COG3743	H3TH	-	cl22429	Predicted 5' DNA nuclease, flap endonuclease-1-like, helix-3-turn-helix (H3TH) domain	[Replication, recombination and repair]
Q#849	EGY32726	non-specific	226436	24	187	4.16128e-15	69.0577	COG3923	PriC	-	cl11483	Primosomal replication protein N''	[Replication, recombination and repair]
Q#516	EGY33905	multi-dom	227307	1	295	4.02518e-170	476.504	COG4973	XerC	-	-	Site-specific recombinase XerC	[Replication, recombination and repair]
Q#2023	EGY33265	multi-dom	227308	1	297	2.72349e-156	441.643	COG4974	XerD	-	-	Site-specific recombinase XerD	[Replication, recombination and repair]
Q#555	EGY34858	specific	224860	1	180	1.18723e-125	354.338	COG1949	Orn	-	cl10012	Oligoribonuclease (3'-5' exoribonuclease)	[RNA processing and modification]
Q#206	EGY34303	multi-dom	223574	92	189	0.00320715	36.4157	COG0500	SmtA	N	-	SAM-dependent methyltransferase	[Secondary metabolites biosynthesis, transport and catabolism, General function prediction only]
Q#267	EGY34364	multi-dom	223574	75	285	3.61959e-05	42.9641	COG0500	SmtA	-	-	SAM-dependent methyltransferase	[Secondary metabolites biosynthesis, transport and catabolism, General function prediction only]
Q#464	EGY34561	multi-dom	223574	1	138	1.32143e-05	43.3493	COG0500	SmtA	C	-	SAM-dependent methyltransferase	[Secondary metabolites biosynthesis, transport and catabolism, General function prediction only]
Q#1333	EGY33570	specific	223423	1	125	1.01972e-21	85.202	COG0346	GloA	-	cl14632	Catechol 2,3-dioxygenase or other lactoylglutathione lyase family enzyme	[Secondary metabolites biosynthesis, transport and catabolism]
Q#689	EGY32452	non-specific	223729	48	139	7.67663e-12	59.9614	COG0656	ARA1	C	cl00470	Aldo/keto reductase, related to diketogulonate reductase	[Secondary metabolites biosynthesis, transport and catabolism]
Q#690	EGY32453	specific	223729	2	198	8.1747e-22	90.3921	COG0656	ARA1	N	cl00470	Aldo/keto reductase, related to diketogulonate reductase	[Secondary metabolites biosynthesis, transport and catabolism]
Q#691	EGY32454	specific	223729	1	305	1.47958e-48	165.506	COG0656	ARA1	-	cl00470	Aldo/keto reductase, related to diketogulonate reductase	[Secondary metabolites biosynthesis, transport and catabolism]
Q#787	EGY32756	specific	224961	2	140	6.74447e-42	137.899	COG2050	PaaI	-	cl00509	Acyl-coenzyme A thioesterase PaaI, contains HGG motif	[Secondary metabolites biosynthesis, transport and catabolism]
Q#1378	EGY33615	multi-dom	225483	735	835	6.9635e-16	80.4258	COG2931	COG2931	N	-	Ca2+-binding protein, RTX toxin-related	[Secondary metabolites biosynthesis, transport and catabolism]
Q#687	EGY32450	specific	225852	4	269	1.93608e-47	161.358	COG3315	YktD	-	cl17173	O-Methyltransferase involved in polyketide biosynthesis	[Secondary metabolites biosynthesis, transport and catabolism]
Q#1937	EGY33179	non-specific	225856	6	81	1.16046e-05	43.9684	COG3319	EntF	C	cl21494	Thioesterase domain of type I polyketide synthase or non-ribosomal peptide synthetase	[Secondary metabolites biosynthesis, transport and catabolism]
Q#1809	EGY33051	multi-dom	225858	2	289	4.21382e-39	147.216	COG3321	PksD	NC	-	Acyl transferase domain in polyketide synthase (PKS) enzymes	[Secondary metabolites biosynthesis, transport and catabolism]
Q#1409	EGY33646	multi-dom	225969	32	97	0.000470645	36.6252	COG3435	COG3435	N	-	Gentisate 1,2-dioxygenase	[Secondary metabolites biosynthesis, transport and catabolism]
Q#1779	EGY33021	non-specific	226040	195	346	9.73786e-07	48.9799	COG3509	LpqC	C	cl21494	Poly(3-hydroxybutyrate) depolymerase	[Secondary metabolites biosynthesis, transport and catabolism]
Q#1800	EGY33042	non-specific	226040	19	124	0.00168314	37.4239	COG3509	LpqC	C	cl21494	Poly(3-hydroxybutyrate) depolymerase	[Secondary metabolites biosynthesis, transport and catabolism]
Q#1786	EGY33028	specific	223424	1	112	5.86658e-59	179.3	COG0347	GlnK	-	cl00412	Nitrogen regulatory protein PII	[Signal transduction mechanisms, Amino acid transport and metabolism]
Q#557	EGY34860	specific	224836	1	81	1.90387e-31	106.884	COG1925	PtsH	-	cl00206	Phosphotransferase system, HPr and related phosphotransfer proteins	[Signal transduction mechanisms, Carbohydrate transport and metabolism]
Q#1765	EGY33007	specific	224836	298	384	2.97041e-29	110.351	COG1925	PtsH	-	cl00206	Phosphotransferase system, HPr and related phosphotransfer proteins	[Signal transduction mechanisms, Carbohydrate transport and metabolism]
Q#1765	EGY33007	specific	224836	421	509	7.85943e-25	98.4094	COG1925	PtsH	-	cl00206	Phosphotransferase system, HPr and related phosphotransfer proteins	[Signal transduction mechanisms, Carbohydrate transport and metabolism]
Q#625	EGY32388	multi-dom	223394	9	743	0	984.821	COG0317	SpoT	-	-	(p)ppGpp synthase/hydrolase, HD superfamily	[Signal transduction mechanisms, Transcription]
Q#932	EGY33950	multi-dom	223394	330	407	0.00980627	36.8447	COG0317	SpoT	N	-	(p)ppGpp synthase/hydrolase, HD superfamily	[Signal transduction mechanisms, Transcription]
Q#1327	EGY34757	multi-dom	223394	1	703	0	976.346	COG0317	SpoT	-	-	(p)ppGpp synthase/hydrolase, HD superfamily	[Signal transduction mechanisms, Transcription]
Q#678	EGY32441	multi-dom	223816	3	227	2.5618e-81	245.284	COG0745	OmpR	-	-	DNA-binding response regulator, OmpR family, contains REC and winged-helix (wHTH) domain	[Signal transduction mechanisms, Transcription]
Q#831	EGY32708	multi-dom	223816	4	232	2.36797e-74	227.565	COG0745	OmpR	-	-	DNA-binding response regulator, OmpR family, contains REC and winged-helix (wHTH) domain	[Signal transduction mechanisms, Transcription]
Q#912	EGY32316	multi-dom	223816	360	472	1.70318e-16	78.4929	COG0745	OmpR	C	-	DNA-binding response regulator, OmpR family, contains REC and winged-helix (wHTH) domain	[Signal transduction mechanisms, Transcription]
Q#1065	EGY34054	multi-dom	223816	1	220	2.05983e-86	257.996	COG0745	OmpR	-	-	DNA-binding response regulator, OmpR family, contains REC and winged-helix (wHTH) domain	[Signal transduction mechanisms, Transcription]
Q#709	EGY32472	multi-dom	225107	6	207	5.29903e-77	232.58	COG2197	CitB	-	-	DNA-binding response regulator, NarL/FixJ family, contains REC and HTH domains	[Signal transduction mechanisms, Transcription]
Q#648	EGY32411	specific	223349	1	88	4.08956e-30	104.358	COG0271	BolA	-	cl00386	Stress-induced morphogen (activity unknown)	[Signal transduction mechanisms]
Q#862	EGY34618	specific	223471	12	159	1.03071e-42	140.862	COG0394	Wzb	-	cl00105	Protein-tyrosine-phosphatase	[Signal transduction mechanisms]
Q#1631	EGY34990	multi-dom	223554	76	229	1.87974e-06	46.5424	COG0478	RIO2	N	-	RIO-like serine/threonine protein kinase fused to N-terminal HTH domain	[Signal transduction mechanisms]
Q#398	EGY34495	multi-dom	223591	197	310	4.63898e-18	77.8969	COG0517	CBS	-	-	CBS domain	[Signal transduction mechanisms]
Q#1736	EGY35219	multi-dom	223591	96	202	8.09077e-17	76.7413	COG0517	CBS	-	-	CBS domain	[Signal transduction mechanisms]
Q#357	EGY34454	specific	223662	154	305	1.43179e-15	71.9046	COG0589	UspA	-	cl00292	Nucleotide-binding universal stress protein, UspA family	[Signal transduction mechanisms]
Q#357	EGY34454	specific	223662	1	152	0.00207037	36.8515	COG0589	UspA	-	cl00292	Nucleotide-binding universal stress protein, UspA family	[Signal transduction mechanisms]
Q#671	EGY32434	specific	223662	1	140	8.694e-17	72.2898	COG0589	UspA	-	cl00292	Nucleotide-binding universal stress protein, UspA family	[Signal transduction mechanisms]
Q#1249	EGY33541	specific	223662	176	298	0.00139874	39.1627	COG0589	UspA	-	cl00292	Nucleotide-binding universal stress protein, UspA family	[Signal transduction mechanisms]
Q#1159	EGY35367	specific	223712	118	263	2.55578e-17	76.2327	COG0639	ApaH	-	cl13995	Diadenosine tetraphosphatase ApaH/serine/threonine protein phosphatase, PP2A family	[Signal transduction mechanisms]
Q#679	EGY32442	multi-dom	223715	158	462	1.8439e-50	176.098	COG0642	BaeS	-	-	Signal transduction histidine kinase	[Signal transduction mechanisms]
Q#912	EGY32316	multi-dom	223715	6	345	2.7121e-53	186.498	COG0642	BaeS	-	-	Signal transduction histidine kinase	[Signal transduction mechanisms]
Q#1066	EGY34055	multi-dom	223715	122	443	3.16241e-37	139.504	COG0642	BaeS	-	-	Signal transduction histidine kinase	[Signal transduction mechanisms]
Q#356	EGY34453	multi-dom	223736	34	238	1.66592e-54	176.946	COG0664	Crp	-	-	cAMP-binding domain of CRP or a regulatory subunit of cAMP-dependent protein kinases	[Signal transduction mechanisms]
Q#1189	EGY35397	multi-dom	223736	12	214	1.13365e-53	173.094	COG0664	Crp	-	-	cAMP-binding domain of CRP or a regulatory subunit of cAMP-dependent protein kinases	[Signal transduction mechanisms]
Q#477	EGY34574	specific	223855	8	125	6.67061e-20	84.8964	COG0784	CheY	-	cl19078	CheY chemotaxis protein or a CheY-like REC (receiver) domain	[Signal transduction mechanisms]
Q#678	EGY32441	specific	223855	1	121	5.08323e-27	101.845	COG0784	CheY	-	cl19078	CheY chemotaxis protein or a CheY-like REC (receiver) domain	[Signal transduction mechanisms]
Q#709	EGY32472	specific	223855	1	128	2.83898e-19	80.274	COG0784	CheY	-	cl19078	CheY chemotaxis protein or a CheY-like REC (receiver) domain	[Signal transduction mechanisms]
Q#831	EGY32708	specific	223855	1	120	5.62233e-26	99.1488	COG0784	CheY	-	cl19078	CheY chemotaxis protein or a CheY-like REC (receiver) domain	[Signal transduction mechanisms]
Q#912	EGY32316	specific	223855	358	484	1.45191e-19	85.6668	COG0784	CheY	-	cl19078	CheY chemotaxis protein or a CheY-like REC (receiver) domain	[Signal transduction mechanisms]
Q#1065	EGY34054	specific	223855	1	119	2.37232e-25	97.2228	COG0784	CheY	-	cl19078	CheY chemotaxis protein or a CheY-like REC (receiver) domain	[Signal transduction mechanisms]
Q#188	EGY34285	multi-dom	223861	47	237	4.68109e-28	108.593	COG0790	TPR	N	-	TPR repeat	[Signal transduction mechanisms]
Q#697	EGY32460	multi-dom	223999	11	331	4.25533e-31	119.43	COG1073	FrsA	-	-	Fermentation-respiration switch protein FrsA, has esterase activity, DUF1100 family	[Signal transduction mechanisms]
Q#1291	EGY34721	multi-dom	224138	6	611	0	1195.51	COG1217	TypA	-	-	Predicted membrane GTPase involved in stress response	[Signal transduction mechanisms]
Q#1451	EGY33792	multi-dom	224327	14	274	3.63734e-47	160.9	COG1409	CpdA	-	-	3',5'-cyclic AMP phosphodiesterase CpdA	[Signal transduction mechanisms]
Q#669	EGY32432	specific	224468	1	60	6.07345e-24	86.3112	COG1551	CsrA	-	cl00670	sRNA-binding carbon storage regulator CsrA	[Signal transduction mechanisms]
Q#1317	EGY34747	specific	224574	6	286	1.16648e-153	433.967	COG1660	RapZ	-	cl22859	RNase adaptor protein for sRNA GlmZ degradation, contains a P-loop ATPase domain	[Signal transduction mechanisms]
Q#1582	EGY33710	specific	224767	1	162	9.3974e-102	292.33	COG1854	LuxS	-	cl00802	S-ribosylhomocysteine lyase LuxS, autoinducer biosynthesis	[Signal transduction mechanisms]
Q#545	EGY34848	specific	224834	1	74	2.36801e-35	117.104	COG1923	Hfq	-	cl00259	sRNA-binding regulator protein Hfq	[Signal transduction mechanisms]
Q#1474	EGY33815	multi-dom	224877	1	498	1.04323e-158	467.591	COG1966	CstA	-	-	Carbon starvation protein CstA	[Signal transduction mechanisms]
Q#1731	EGY35214	specific	224973	3	150	1.50429e-46	150.905	COG2062	SixA	-	cl11399	Phosphohistidine phosphatase SixA	[Signal transduction mechanisms]
Q#1557	EGY33685	non-specific	225083	481	562	0.00503173	36.5825	COG2172	RsbW	N	cl00075	Anti-sigma regulatory factor (Ser/Thr protein kinase)	[Signal transduction mechanisms]
Q#241	EGY34338	non-specific	225095	66	217	9.90129e-07	47.0164	COG2184	FIDO	-	cl00960	Fido, protein-threonine AMPylation domain	[Signal transduction mechanisms]
Q#1134	EGY35342	non-specific	225095	28	78	1.54614e-07	48.9424	COG2184	FIDO	N	cl00960	Fido, protein-threonine AMPylation domain	[Signal transduction mechanisms]
Q#1136	EGY35344	non-specific	225095	4	192	4.62682e-45	153.331	COG2184	FIDO	-	cl00960	Fido, protein-threonine AMPylation domain	[Signal transduction mechanisms]
Q#1255	EGY33547	non-specific	225095	56	241	1.80895e-21	89.7735	COG2184	FIDO	-	cl00960	Fido, protein-threonine AMPylation domain	[Signal transduction mechanisms]
Q#1877	EGY33119	specific	225095	1	178	2.09177e-65	201.481	COG2184	FIDO	-	cl00960	Fido, protein-threonine AMPylation domain	[Signal transduction mechanisms]
Q#2026	EGY32331	non-specific	225095	112	230	2.10053e-06	45.8608	COG2184	FIDO	N	cl00960	Fido, protein-threonine AMPylation domain	[Signal transduction mechanisms]
Q#2074	EGY32813	non-specific	225095	26	182	4.39716e-24	96.3219	COG2184	FIDO	C	cl00960	Fido, protein-threonine AMPylation domain	[Signal transduction mechanisms]
Q#912	EGY32316	specific	225108	500	611	9.39269e-13	65.5447	COG2198	HPtr	-	cl00086	HPt (histidine-containing phosphotransfer) domain	[Signal transduction mechanisms]
Q#477	EGY34574	multi-dom	225114	5	415	2.97177e-112	340.058	COG2204	AtoC	-	-	DNA-binding transcriptional response regulator, NtrC family, contains REC, AAA-type ATPase, and a Fis-type DNA-binding domains	[Signal transduction mechanisms]
Q#1880	EGY33122	multi-dom	225114	4	98	2.5294e-12	61.1736	COG2204	AtoC	N	-	DNA-binding transcriptional response regulator, NtrC family, contains REC, AAA-type ATPase, and a Fis-type DNA-binding domains	[Signal transduction mechanisms]
Q#671	EGY32434	multi-dom	225115	4	118	0.000236864	38.4225	COG2205	KdpD	NC	-	K+-sensing histidine kinase KdpD	[Signal transduction mechanisms]
Q#1714	EGY35197	non-specific	225215	4	61	3.39666e-08	45.8535	COG2336	MazE	C	cl00877	Antitoxin component of the MazEF toxin-antitoxin module	[Signal transduction mechanisms]
Q#1802	EGY33044	multi-dom	225297	338	418	3.42903e-10	57.8465	COG2453	CDC14	N	-	Protein-tyrosine phosphatase	[Signal transduction mechanisms]
Q#679	EGY32442	specific	225359	158	239	0.000842375	37.7403	COG2770	HAMP	-	cl01054	HAMP domain	[Signal transduction mechanisms]
Q#1821	EGY33063	non-specific	225473	13	99	3.2837e-34	114.765	COG2921	YbeD	-	cl01102	Putative lipoic acid-binding regulatory protein	[Signal transduction mechanisms]
Q#1924	EGY33166	multi-dom	225523	1	204	5.27972e-58	183.768	COG2976	YfgM	-	-	Putative negative regulator of RcsB-dependent stress response	[Signal transduction mechanisms]
Q#1271	EGY33460	specific	225570	34	329	1.38235e-140	403.715	COG3026	RseB	-	cl19192	Negative regulator of sigma E activity	[Signal transduction mechanisms]
Q#1270	EGY33459	multi-dom	225615	1	192	7.57079e-75	226.615	COG3073	RseA	-	-	Negative regulator of sigma E activity	[Signal transduction mechanisms]
Q#1244	EGY33536	multi-dom	225651	6	207	7.70357e-92	270.573	COG3109	ProQ	-	-	sRNA-binding protein	[Signal transduction mechanisms]
Q#1736	EGY35219	multi-dom	225979	149	259	0.000191016	42.1185	COG3448	COG3448	N	-	CBS-domain-containing membrane protein	[Signal transduction mechanisms]
Q#2133	EGY32872	multi-dom	226080	1	37	5.81942e-05	37.4334	COG3550	HipA	NC	-	Serine/threonine protein kinase HipA, toxin component of the HipAB toxin-antitoxin module	[Signal transduction mechanisms]
Q#2134	EGY32873	multi-dom	226080	7	87	5.17549e-10	54.3822	COG3550	HipA	NC	-	Serine/threonine protein kinase HipA, toxin component of the HipAB toxin-antitoxin module	[Signal transduction mechanisms]
Q#2135	EGY32874	multi-dom	226080	2	38	0.000926908	33.9666	COG3550	HipA	C	-	Serine/threonine protein kinase HipA, toxin component of the HipAB toxin-antitoxin module	[Signal transduction mechanisms]
Q#558	EGY34861	non-specific	226367	173	228	2.28068e-06	46.2213	COG3848	PykA2	N	cl22963	Phosphohistidine swiveling domain of PEP-utilizing enzymes	[Signal transduction mechanisms]
Q#1557	EGY33685	multi-dom	226368	3	563	0	624.756	COG3850	NarQ	-	-	Signal transduction histidine kinase, nitrate/nitrite-specific	[Signal transduction mechanisms]
Q#478	EGY34575	multi-dom	226655	1	656	0	616.551	COG4192	COG4192	-	-	Signal transduction histidine kinase regulating phosphoglycerate transport system	[Signal transduction mechanisms]
Q#1300	EGY34730	specific	227340	1	79	1.27904e-35	117.468	COG5007	IbaG	-	cl00386	Acid stress-induced BolA-like protein IbaG/YrbA, predicted regulator of iron metabolism	[Signal transduction mechanisms]
Q#666	EGY32429	specific	225602	1	105	6.52474e-76	221.791	COG3060	MetJ	-	cl23424	Transcriptional regulator of met regulon	[Transcription, Amino acid transport and metabolism]
Q#543	EGY34846	multi-dom	225821	9	319	8.21854e-168	479.627	COG3283	TyrR	N	-	Transcriptional regulator of aromatic amino acids metabolism	[Transcription, Amino acid transport and metabolism]
Q#315	EGY34412	multi-dom	224268	1	243	6.89203e-90	268.718	COG1349	GlpR	-	-	DNA-binding transcriptional regulator of sugar metabolism, DeoR/GlpR family	[Transcription, Carbohydrate transport and metabolism]
Q#699	EGY32462	multi-dom	224268	17	265	4.10505e-82	249.458	COG1349	GlpR	-	-	DNA-binding transcriptional regulator of sugar metabolism, DeoR/GlpR family	[Transcription, Carbohydrate transport and metabolism]
Q#931	EGY33949	multi-dom	224268	7	44	0.00675091	35.2872	COG1349	GlpR	NC	-	DNA-binding transcriptional regulator of sugar metabolism, DeoR/GlpR family	[Transcription, Carbohydrate transport and metabolism]
Q#986	EGY35250	multi-dom	224268	1	251	1.87394e-94	280.659	COG1349	GlpR	-	-	DNA-binding transcriptional regulator of sugar metabolism, DeoR/GlpR family	[Transcription, Carbohydrate transport and metabolism]
Q#1785	EGY33027	multi-dom	224268	1	252	8.45144e-86	258.318	COG1349	GlpR	-	-	DNA-binding transcriptional regulator of sugar metabolism, DeoR/GlpR family	[Transcription, Carbohydrate transport and metabolism]
Q#2112	EGY32851	multi-dom	224268	1	249	2.55992e-68	213.635	COG1349	GlpR	-	-	DNA-binding transcriptional regulator of sugar metabolism, DeoR/GlpR family	[Transcription, Carbohydrate transport and metabolism]
Q#2149	EGY35083	multi-dom	224268	4	240	2.08222e-62	198.227	COG1349	GlpR	-	-	DNA-binding transcriptional regulator of sugar metabolism, DeoR/GlpR family	[Transcription, Carbohydrate transport and metabolism]
Q#82	EGY34179	multi-dom	224851	1	304	7.63064e-76	237.002	COG1940	NagC	-	-	Sugar kinase of the NBD/HSP70 family, may contain an N-terminal HTH domain	[Transcription, Carbohydrate transport and metabolism]
Q#209	EGY34306	multi-dom	224851	84	406	6.1703e-63	206.957	COG1940	NagC	-	-	Sugar kinase of the NBD/HSP70 family, may contain an N-terminal HTH domain	[Transcription, Carbohydrate transport and metabolism]
Q#440	EGY34537	multi-dom	224851	76	402	8.08273e-20	87.93	COG1940	NagC	-	-	Sugar kinase of the NBD/HSP70 family, may contain an N-terminal HTH domain	[Transcription, Carbohydrate transport and metabolism]
Q#1093	EGY34082	multi-dom	224851	1	292	7.2582e-64	205.801	COG1940	NagC	-	-	Sugar kinase of the NBD/HSP70 family, may contain an N-terminal HTH domain	[Transcription, Carbohydrate transport and metabolism]
Q#140	EGY34237	multi-dom	223627	18	215	9.17149e-16	78.6232	COG0553	HepA	NC	-	Superfamily II DNA or RNA helicase, SNF2 family	[Transcription, Replication, recombination and repair]
Q#141	EGY34238	multi-dom	223627	4	83	1.46245e-07	52.4296	COG0553	HepA	N	-	Superfamily II DNA or RNA helicase, SNF2 family	[Transcription, Replication, recombination and repair]
Q#146	EGY34243	multi-dom	223989	193	447	2.98671e-11	63.9979	COG1061	SSL2	N	-	Superfamily II DNA or RNA helicase	[Transcription, Replication, recombination and repair]
Q#1637	EGY34996	multi-dom	224885	1	205	4.37801e-81	242.54	COG1974	LexA	-	-	SOS-response transcriptional repressor LexA (RecA-mediated autopeptidase)	[Transcription, Signal transduction mechanisms]
Q#1735	EGY35218	multi-dom	224885	15	140	2.92609e-29	106.95	COG1974	LexA	N	-	SOS-response transcriptional repressor LexA (RecA-mediated autopeptidase)	[Transcription, Signal transduction mechanisms]
Q#1342	EGY33579	specific	223295	1	240	8.4281e-141	397.722	COG0217	TACO1	-	cl00361	Transcriptional and/or translational regulatory protein YebC/TACO1	[Transcription, Translation, ribosomal structure and biogenesis]
Q#1751	EGY32993	multi-dom	223163	1	1342	0	1584.13	COG0085	RpoB	-	-	DNA-directed RNA polymerase, beta subunit/140 kD subunit	[Transcription]
Q#1750	EGY32992	multi-dom	223164	16	854	0	1040.66	COG0086	RpoC	-	-	DNA-directed RNA polymerase, beta' subunit/160 kD subunit	[Transcription]
Q#226	EGY34323	multi-dom	223273	161	355	8.35356e-68	217.868	COG0195	NusA	-	-	Transcription antitermination factor NusA, contains S1 and KH domains	[Transcription]
Q#904	EGY34660	multi-dom	223280	8	323	1.38735e-139	400.953	COG0202	RpoA	-	-	DNA-directed RNA polymerase, alpha subunit/40 kD subunit	[Transcription]
Q#1756	EGY32998	multi-dom	223328	6	181	6.60114e-79	235.295	COG0250	NusG	-	-	Transcription antitermination factor NusG	[Transcription]
Q#1649	EGY35008	multi-dom	223631	24	734	0	874.409	COG0557	VacB	-	-	Exoribonuclease R	[Transcription]
Q#953	EGY33971	multi-dom	223642	259	615	4.51359e-139	411.693	COG0568	RpoD	-	-	DNA-directed RNA polymerase, sigma subunit (sigma70/sigma32)	[Transcription]
Q#1990	EGY33232	multi-dom	223644	1	226	1.505e-103	301.863	COG0571	Rnc	-	-	dsRNA-specific ribonuclease	[Transcription]
Q#155	EGY34252	multi-dom	223656	6	294	1.50819e-52	176.315	COG0583	LysR	-	-	DNA-binding transcriptional regulator, LysR family	[Transcription]
Q#276	EGY34373	multi-dom	223656	1	297	5.27821e-49	167.455	COG0583	LysR	-	-	DNA-binding transcriptional regulator, LysR family	[Transcription]
Q#360	EGY34457	multi-dom	223656	4	290	1.2395e-56	186.715	COG0583	LysR	-	-	DNA-binding transcriptional regulator, LysR family	[Transcription]
Q#688	EGY32451	multi-dom	223656	4	175	1.12393e-16	74.2371	COG0583	LysR	N	-	DNA-binding transcriptional regulator, LysR family	[Transcription]
Q#696	EGY32459	multi-dom	223656	13	295	1.01573e-51	173.619	COG0583	LysR	-	-	DNA-binding transcriptional regulator, LysR family	[Transcription]
Q#724	EGY32487	multi-dom	223656	1	291	1.42637e-59	194.034	COG0583	LysR	-	-	DNA-binding transcriptional regulator, LysR family	[Transcription]
Q#747	EGY33371	multi-dom	223656	1	281	3.54322e-56	185.56	COG0583	LysR	-	-	DNA-binding transcriptional regulator, LysR family	[Transcription]
Q#1041	EGY34030	multi-dom	223656	6	294	1.91945e-52	175.545	COG0583	LysR	-	-	DNA-binding transcriptional regulator, LysR family	[Transcription]
Q#1761	EGY33003	multi-dom	223656	10	303	7.65146e-50	168.996	COG0583	LysR	-	-	DNA-binding transcriptional regulator, LysR family	[Transcription]
Q#986	EGY35250	specific	223713	9	55	0.00785929	34.0241	COG0640	ArsR	NC	cl21459	DNA-binding transcriptional regulator, ArsR family	[Transcription]
Q#580	EGY34883	specific	223852	6	139	6.68881e-51	161.328	COG0781	NusB	-	cl00223	Transcription termination factor NusB	[Transcription]
Q#855	EGY34611	non-specific	223852	17	138	5.91617e-05	41.9159	COG0781	NusB	-	cl00223	Transcription termination factor NusB	[Transcription]
Q#718	EGY32481	multi-dom	223853	7	157	2.07004e-55	173.64	COG0782	GreA	-	-	Transcription elongation factor, GreA/GreB family	[Transcription]
Q#2082	EGY32821	multi-dom	223853	6	157	7.64706e-63	192.514	COG0782	GreA	-	-	Transcription elongation factor, GreA/GreB family	[Transcription]
Q#1150	EGY35358	multi-dom	223860	3	117	5.90368e-27	98.2795	COG0789	SoxR	-	-	DNA-binding transcriptional regulator, MerR family	[Transcription]
Q#1172	EGY35380	multi-dom	223860	1	105	1.42982e-24	92.1163	COG0789	SoxR	-	-	DNA-binding transcriptional regulator, MerR family	[Transcription]
Q#1907	EGY33149	multi-dom	223860	1	123	1.35243e-20	81.7159	COG0789	SoxR	-	-	DNA-binding transcriptional regulator, MerR family	[Transcription]
Q#663	EGY32426	specific	223886	2	137	1.36533e-63	193.218	COG0816	YqgF	-	cl21482	RNase H-fold protein, predicted Holliday junction resolvase in Firmicutes and mycoplasms, involved in anti-termination at Rho-dependent terminators	[Transcription]
Q#725	EGY32488	non-specific	223886	330	430	0.00809245	36.0562	COG0816	YqgF	C	cl21482	RNase H-fold protein, predicted Holliday junction resolvase in Firmicutes and mycoplasms, involved in anti-termination at Rho-dependent terminators	[Transcription]
Q#1813	EGY33055	multi-dom	224080	1	412	0	806.882	COG1158	Rho	-	-	Transcription termination factor Rho	[Transcription]
Q#1554	EGY33682	multi-dom	224112	24	280	1.07114e-26	105.104	COG1191	FliA	-	-	DNA-directed RNA polymerase specialized sigma subunit	[Transcription]
Q#471	EGY34568	specific	224197	1	67	1.52617e-28	98.3837	COG1278	CspC	-	cl09927	Cold shock protein, CspA family	[Transcription]
Q#1850	EGY33092	specific	224197	3	69	1.02309e-28	98.7689	COG1278	CspC	-	cl09927	Cold shock protein, CspA family	[Transcription]
Q#371	EGY34468	multi-dom	224228	10	174	8.59543e-12	59.5669	COG1309	AcrR	-	-	DNA-binding transcriptional regulator, AcrR family	[Transcription]
Q#748	EGY33372	multi-dom	224228	1	196	4.20531e-13	63.8041	COG1309	AcrR	-	-	DNA-binding transcriptional regulator, AcrR family	[Transcription]
Q#1191	EGY35399	multi-dom	224228	1	178	1.16066e-09	54.1741	COG1309	AcrR	-	-	DNA-binding transcriptional regulator, AcrR family	[Transcription]
Q#1208	EGY35416	multi-dom	224228	10	102	5.4248e-14	66.1153	COG1309	AcrR	C	-	DNA-binding transcriptional regulator, AcrR family	[Transcription]
Q#1039	EGY34028	multi-dom	224246	1	149	7.00971e-85	248.303	COG1327	NrdR	-	-	Transcriptional regulator NrdR, contains Zn-ribbon and ATP-cone domains	[Transcription]
Q#335	EGY34432	multi-dom	224313	12	57	0.000360726	36.5574	COG1395	COG1395	NC	-	Predicted transcriptional regulator	[Transcription]
Q#7	EGY33301	multi-dom	224314	5	59	1.51559e-05	43.1005	COG1396	HipB	C	-	Transcriptional regulator, contains XRE-family HTH domain	[Transcription]
Q#407	EGY34504	multi-dom	224314	10	65	6.75875e-05	37.3226	COG1396	HipB	C	-	Transcriptional regulator, contains XRE-family HTH domain	[Transcription]
Q#1045	EGY34034	multi-dom	224355	7	151	4.3889e-54	169.716	COG1438	ArgR	-	-	Arginine repressor	[Transcription]
Q#2137	EGY32876	non-specific	224393	8	56	0.00644885	31.034	COG1476	XRE	C	cl22854	DNA-binding transcriptional regulator, XRE-family HTH domain	[Transcription]
Q#869	EGY34625	multi-dom	224439	1	150	1.21379e-37	127.501	COG1522	Lrp	-	-	DNA-binding transcriptional regulator, Lrp family	[Transcription]
Q#877	EGY34633	multi-dom	224439	1	155	3.09092e-40	134.435	COG1522	Lrp	-	-	DNA-binding transcriptional regulator, Lrp family	[Transcription]
Q#1229	EGY33521	multi-dom	224439	9	156	4.38989e-52	165.251	COG1522	Lrp	-	-	DNA-binding transcriptional regulator, Lrp family	[Transcription]
Q#717	EGY32480	multi-dom	224511	10	186	1.23969e-38	132.522	COG1595	RpoE	-	-	DNA-directed RNA polymerase specialized sigma subunit, sigma24 family	[Transcription]
Q#1269	EGY33458	multi-dom	224511	6	179	1.5485e-46	152.938	COG1595	RpoE	-	-	DNA-directed RNA polymerase specialized sigma subunit, sigma24 family	[Transcription]
Q#49	EGY34146	multi-dom	224525	7	332	8.33782e-96	289.98	COG1609	PurR	-	-	DNA-binding transcriptional regulator, LacI/PurR family	[Transcription]
Q#274	EGY34371	multi-dom	224525	100	207	0.00200468	36.9034	COG1609	PurR	C	-	DNA-binding transcriptional regulator, LacI/PurR family	[Transcription]
Q#280	EGY34377	multi-dom	224525	2	332	1.40625e-142	409.391	COG1609	PurR	-	-	DNA-binding transcriptional regulator, LacI/PurR family	[Transcription]
Q#283	EGY34380	multi-dom	224525	1	313	3.80939e-72	228.733	COG1609	PurR	-	-	DNA-binding transcriptional regulator, LacI/PurR family	[Transcription]
Q#629	EGY32392	multi-dom	224525	159	217	0.00986262	35.3626	COG1609	PurR	NC	-	DNA-binding transcriptional regulator, LacI/PurR family	[Transcription]
Q#907	EGY32311	multi-dom	224525	2	332	7.05172e-118	346.604	COG1609	PurR	-	-	DNA-binding transcriptional regulator, LacI/PurR family	[Transcription]
Q#664	EGY32427	specific	224592	1	186	1.32785e-84	250.669	COG1678	AlgH	-	cl00731	Putative transcriptional regulator, AlgH/UPF0301 family	[Transcription]
Q#1073	EGY34062	multi-dom	224623	5	49	0.00578582	33.0778	COG1709	COG1709	C	-	Predicted transcriptional regulator	[Transcription]
Q#762	EGY33386	specific	224647	15	118	1.55243e-33	114.77	COG1733	HxlR	-	cl21459	DNA-binding transcriptional regulator, HxlR family	[Transcription]
Q#398	EGY34495	multi-dom	224651	2	167	3.92531e-22	92.7446	COG1737	RpiR	N	-	DNA-binding transcriptional regulator, MurR/RpiR family, contains HTH and SIS domains	[Transcription]
Q#1094	EGY34083	multi-dom	224651	3	288	8.14397e-92	276.1	COG1737	RpiR	-	-	DNA-binding transcriptional regulator, MurR/RpiR family, contains HTH and SIS domains	[Transcription]
Q#1388	EGY33625	multi-dom	224651	9	277	1.76567e-62	200.601	COG1737	RpiR	-	-	DNA-binding transcriptional regulator, MurR/RpiR family, contains HTH and SIS domains	[Transcription]
Q#1479	EGY33820	multi-dom	224651	10	164	1.27513e-09	54.9951	COG1737	RpiR	N	-	DNA-binding transcriptional regulator, MurR/RpiR family, contains HTH and SIS domains	[Transcription]
Q#1326	EGY34756	specific	224672	1	72	1.00525e-20	79.2746	COG1758	RpoZ	-	cl14651	DNA-directed RNA polymerase, subunit K/omega	[Transcription]
Q#1688	EGY35171	specific	224870	1	130	1.26929e-53	168.649	COG1959	IscR	-	cl21459	DNA-binding transcriptional regulator, IscR family	[Transcription]
Q#1033	EGY34022	specific	224916	5	131	1.45486e-54	174.425	COG2005	ModE	-	cl21459	DNA-binding transcriptional regulator ModE (molybdenum-dependent)	[Transcription]
Q#1761	EGY33003	non-specific	224916	15	86	2.97019e-06	44.6129	COG2005	ModE	C	cl21459	DNA-binding transcriptional regulator ModE (molybdenum-dependent)	[Transcription]
[truncated: 276 more rows]
